# Supplementary material for: Dysregulated lipid metabolism in late preterm low birth weight neonates: A case-control study on maternal lipid levels and early metabolic programming implications
Source: PeerJ journal article supplement (doi:10.7717/peerj.19542), 2025-06-11
Supplement: raw_data.xlsx [file raw_data.xlsx]

## Sheet: Sheet1
Index	Class I	Class II	Q1 (Da)	Molecular weight (Da)	Ionization model	Formula	Case-1	Case-2	Case-4	Case-5	Control-2	Control-3	Control-4	Control-5	Control-6	Control-7	Control-8	Case-6	Control-9	Case-7	Case-8	Case-9	Control-10	Control-11	Control-12	Control-13	Case-10	Case-11	Control-14	Case-12	Case-13	Case-14	Control-15	Case-15	Control-16	Control-17	Control-18	Case-16	Case-17	Control-19	Control-20	Case-18	Case-19	Control-21	Control-22	Case-20	Control-23	Control-24	Case-21
LIPID-N-0039	FA	Eicosanoid	319.227	320.235	[M-H]-	C20H32O3	317625	58289.9	428022	145067	18770.6	59220.1	34206.5	48035.7	23908.3	90560.6	30784.3	50084.4	25601.9	254610	255234	119919	63263.2	25387.4	45261.6	19608.7	177631	90025.3	68440.7	35782.1	132892	78110.2	25382.9	96900.9	46533.9	45716	26210.1	88465.4	134548	49405.8	191114	20449.8	7659.44	7146.6	28303.7	12508.7	40478.9	26699	133231
LIPID-N-0032	FA	Eicosanoid	317.212	318.219	[M-H]-	C20H30O3	49952.6	17896.9	36173.5	20002.8	30063.3	12817.1	26377.9	26161.2	7838.13	21051.6	20653	27280	12310.8	25015.1	27509.8	39922.3	18924.2	12542.9	20626.3	23656.4	29335.3	16193.6	8054.73	8741.43	29007.7	27287.5	29513.6	30214.2	26550	23311.6	21588.5	35253.7	16812.5	22453.4	17482.3	36229.9	26298.6	26688.1	32316.6	22807.2	18206.2	28936.2	32103
LIPID-P-0055	ST	CE	628.603	610.569	[M+NH4]+	C42H74O2	53047.3	17362.9	28655.7	35885.8	36797	39200	29233.8	30428.6	44708.6	31470	31217.3	26794.4	28362.6	57204.8	55829.6	44181.7	51405.3	41051.5	36575.4	60161.9	30768.9	42203.8	38423.3	50891.4	66493.9	32868.5	38579.6	32161.9	40015	37388.8	50376.2	45921.6	37483.6	30701.8	21671	37307.3	44104	42710.9	28509.8	36894.2	30009.4	39149.5	39216.9
LIPID-P-0056	ST	CE	642.628	624.585	[M+NH4]+	C43H76O2	748350	455543	908980	962633	916170	1.12542e+06	1.10088e+06	1.09877e+06	847200	836927	502329	740362	527653	933454	989038	953273	683381	790759	660813	807927	563233	528752	601894	617289	712279	688224	579554	525239	615863	847637	546292	554175	550540	537452	503852	693292	534923	617533	552543	636128	458670	503468	535341
LIPID-P-0064	ST	CE	640.613	622.569	[M+NH4]+	C43H74O2	325454	283023	276858	687474	463523	429198	465504	399014	565499	1.03862e+06	241119	530289	344686	441628	399245	687430	479611	399071	407663	407728	334055	320553	323124	301013	918468	406486	274408	385729	409828	410646	363927	261223	223832	401052	256449	546504	231053	379207	289647	476101	249743	309514	205084
LIPID-P-0065	ST	CE	654.619	636.585	[M+NH4]+	C44H76O2	90898	56646.2	85112.7	129440	77955.3	112834	100971	110918	128151	152090	75119.9	115296	80907.2	131296	90328.5	141312	134079	101858	81056.6	92564.7	96580.6	78442.9	115963	98020.5	213887	117756	97769.4	99213.7	116773	100351	140813	92249.7	80529.2	91188.5	102352	146535	86246.8	128659	95258.7	111657	70815.1	99855.7	83140.8
LIPID-P-0057	ST	CE	670.66	652.616	[M+NH4]+	C45H80O2	598194	220879	470022	781774	759537	878827	717787	845293	708761	675424	349577	498836	396668	660227	737337	589877	601989	589142	528002	598364	390310	377688	458563	457829	492396	453248	413462	391114	447345	481431	422980	377828	371892	384559	431909	568899	362201	375760	372242	409482	327644	461840	373561
LIPID-P-0066	ST	CE	668.644	650.6	[M+NH4]+	C45H78O2	1.13372e+06	1.02418e+06	1.84912e+06	1.71225e+06	1.49207e+06	1.66449e+06	1.8202e+06	1.35222e+06	1.48394e+06	2.14752e+06	1.09895e+06	1.36882e+06	1.22478e+06	1.88064e+06	1.47458e+06	1.88844e+06	1.58027e+06	1.30472e+06	1.36313e+06	1.06695e+06	1.71283e+06	1.51216e+06	1.35246e+06	1.28909e+06	2.01017e+06	1.85588e+06	1.22913e+06	1.69699e+06	1.74519e+06	2.17737e+06	1.84944e+06	1.55966e+06	1.48982e+06	1.96396e+06	1.50599e+06	1.80588e+06	1.32463e+06	1.93398e+06	2.09765e+06	1.63093e+06	1.36187e+06	1.57259e+06	1.56072e+06
LIPID-P-0073	ST	CE	666.628	648.585	[M+NH4]+	C45H76O2	1.16366e+06	1.02801e+06	1.76658e+06	1.17e+06	1.00864e+06	2.27872e+06	1.69403e+06	1.17854e+06	1.38688e+06	1.48061e+06	1.27662e+06	894529	1.13139e+06	1.69391e+06	1.19414e+06	2.91386e+06	1.59695e+06	1.48337e+06	1.1783e+06	1.09794e+06	2.38977e+06	1.84423e+06	990123	1.14083e+06	1.63954e+06	1.79896e+06	1.35756e+06	1.87232e+06	2.58253e+06	1.94069e+06	1.66556e+06	1.58828e+06	1.39422e+06	1.4216e+06	1.69609e+06	1.86503e+06	1.92542e+06	1.56237e+06	1.74912e+06	1.87148e+06	1.83502e+06	1.56886e+06	1.81661e+06
LIPID-P-0077	ST	CE	664.613	646.569	[M+NH4]+	C45H74O2	35767.4	27657.3	79802.4	71003.5	28790.6	88354.4	53497.4	39681.1	65932	116111	60053.4	49565.9	36810	122304	75872.1	125270	63420.6	48923.3	31929.8	30240.9	109314	82600.7	30745.3	48238	121650	114517	57155.7	128501	152200	93717.3	123229	129272	90813.3	80023	82963.4	106429	50601.2	59221.2	113619	80839.6	53683.7	59134.7	57841.2
LIPID-P-0068	ST	CE	696.675	678.631	[M+NH4]+	C47H82O2	26370.6	21560.7	55976.1	56669	42048.9	47851.7	64761.8	33126.6	45189.4	91774.1	23968.3	49584.4	44101.7	71604.7	30215.8	62301.9	58716.4	41117.1	37212.3	21295.8	48586.2	41574.2	27469.1	45219.9	86128.3	83118	32562	65061.5	51425.4	44340.2	80220.8	48537.2	55499	82905.3	60332.1	93900	41269.1	95374.5	48525.3	68270.8	41911.8	57186	45023.7
LIPID-P-0075	ST	CE	694.657	676.616	[M+NH4]+	C47H80O2	19988.9	13908.9	21507.5	34520.4	19208.1	35655.7	28991.3	32213.2	29184.4	19717.7	28905.4	20164.9	21504.5	47028.4	19889.5	38016.7	24083.5	18136.8	21413	25622.7	45120.9	30784.3	12779	35096.7	53556.6	46770.4	19484.6	38466.6	36363.9	28351.9	46315.7	33787.5	35488.6	34732.6	42720.4	48219.2	26559.1	31493.3	38576	33777.8	22281.3	31799.7	26011.6
LIPID-P-0079	ST	CE	692.644	674.6	[M+NH4]+	C47H78O2	172496	99101.2	178568	328393	228087	243424	282327	320297	358975	492074	294530	198119	287079	227478	216885	379608	282939	324181	307816	369205	254085	238191	386477	258507	448633	258495	198171	250073	444926	367649	268156	175055	192289	302501	228684	280359	308260	241458	228285	288976	186821	193787	194895
LIPID-P-0083	ST	CE	690.585	672.585	[M+NH4]+	C47H76O2	509238	163591	449793	712651	583185	804375	726994	765797	990096	1.33796e+06	617095	510022	725865	748980	901184	1.09261e+06	916064	833559	979165	1.05619e+06	635928	1.064e+06	830266	659153	865411	838226	730998	952987	900867	906085	991592	515715	554047	609248	590080	683258	798736	788336	623844	819820	678347	695777	561112
LIPID-P-0087	ST	CE	688.613	670.569	[M+NH4]+	C47H74O2	89002.8	98692.2	201442	118411	47639	355741	153394	51886.7	122165	174456	282651	36981	167965	113208	201851	143442	86243	220585	151899	199597	77204.5	59562.9	121774	48258.8	147119	105980	146410	89713.1	130945	99181.9	316064	108112	46151.6	141476	85053.4	68288.4	87820.5	121756	91676.4	118385	113095	129457	33485.2
LIPID-P-0060	ST	CE	726.722	708.678	[M+NH4]+	C49H88O2	4242.49	1830.47	4654.34	4468.63	2849.54	7548.29	5867.97	5292.28	3371.85	4046.62	1440.6	3671.83	2027.06	5027.32	3336.33	4535.26	5616.09	3085.68	2140.81	2275.97	2493.72	3773.53	2070.26	3506.52	4224.76	3793.66	2119.35	1473.74	2436.62	2647.99	1623.21	2661.56	3438.14	3731.05	2468.77	3410.56	2085.21	2917.11	2267.64	2328.65	1565.85	2427.83	1888.72
LIPID-P-0069	ST	CE	724.707	706.663	[M+NH4]+	C49H86O2	8139.82	8718.22	19801.9	13331.6	7930.82	15450.2	12981.5	10241.9	11561.6	14578	6338.85	9525.04	9526.32	15939.3	7528.91	18118.1	13649.3	5542.32	7903.73	4421.4	13578.3	11183.4	6441.57	9953.06	21732.9	17190.3	6686.88	16791.6	13806.3	8443.18	12947.2	10373.8	12026.5	18757.4	10998.5	17949.2	9851.58	18552.8	11304.6	12526.3	7815.3	12241.7	8687.27
LIPID-P-0089	ST	CE	716.644	698.6	[M+NH4]+	C49H78O2	27794.6	30040	19893.5	136768	76375.1	64022.6	61303.8	107073	146228	156011	67922.8	50450.4	74081.8	94860	43972.4	95785	60557.6	70746.1	106114	39228.1	39544.9	62874.6	83538.8	91810.5	154376	86399	48221.7	64977.5	106787	74714.6	108217	47515.1	71835.8	128452	39268.7	129494	78572.9	88075.7	80718.5	108681	58757.3	65749.6	49710.4
LIPID-P-0092	ST	CE	714.628	696.585	[M+NH4]+	C49H76O2	113094	64782.8	98154.3	254703	160989	265550	146694	237800	257524	359794	214428	136316	197712	201440	260153	331990	250200	493915	287802	440689	228814	103860	177738	247707	234809	187659	167164	328678	168395	322962	307661	153155	140222	221025	113250	148156	190289	335410	209163	483964	134366	244514	110103
LIPID-P-0070	ST	CE	752.728	734.694	[M+NH4]+	C51H90O2	7139.12	4274.07	9944.65	7950.69	5997.26	14920.8	13463.9	6907.2	9174.17	12679	4926.7	7588.07	6147.06	12916	5587.89	12861.5	8030.61	4410.86	6628.5	3725.96	6282.53	6060.59	4206.58	7850.52	18629.8	9621.35	5276.77	5252.05	9349.02	5942.61	5409.83	5374.61	7669.35	10494.2	6306.86	12229.2	7103.07	13402.2	5028.58	9063.13	3075.15	6439.84	3305.33
LIPID-P-0090	ST	CE	744.7	712.616	[M+NH4]+	C50H80O2	17253	22923.8	21401.6	29568.4	14568.3	42905.8	19885.5	14074.5	12911.4	15636.4	32104.4	15957	34571.4	47329.8	28043.8	43866.9	30409.5	32980.5	22687.2	47444.5	24245.1	24915.4	13009	32497.9	48542.7	63341	30837.7	37725	41786.7	26398.5	32784.7	38117.2	34486.6	30961.5	33273.5	41433.5	23112.6	41151.9	25680.5	58133.8	21351.4	58190	19096.7
LIPID-P-1251	ST	CE	780.76	762.725	[M+NH4]+	C53H94O2	1847.44	1037.74	2569.73	2489.27	1674.65	3896.53	3289.64	2355.33	2330.47	2820.96	849.662	2692.14	1313.46	2890.8	1262.7	2805.36	7193.93	1668.98	951.636	1302.81	1041.24	1198.64	988.809	1446.79	3594.37	2276.65	967.047	1297.01	1523.2	1632.55	1269.15	1483.85	1459.21	2485.16	1640.05	2373.45	876.307	1860.92	1194.88	2148.58	739.998	1437.7	1205.97
LIPID-P-0013	FA	CAR	316.25	315.241	[M+H]+	C17H33NO4	1.47837e+06	1.89672e+06	1.22045e+06	1.81118e+06	2.41003e+06	1.89139e+06	1.34062e+06	1.01182e+06	730968	1.17105e+06	919843	1.31718e+06	1.74149e+06	1.64053e+06	2.5428e+06	2.53397e+06	1.54763e+06	1.08473e+06	1.18409e+06	1.18372e+06	1.57012e+06	2.32324e+06	677193	1.4703e+06	1.34896e+06	2.14301e+06	1.09728e+06	1.49272e+06	949451	1.75935e+06	659978	1.49748e+06	1.62838e+06	971827	1.82925e+06	1.13341e+06	1.87968e+06	1.85022e+06	1.50635e+06	1.70488e+06	2.30531e+06	1.38609e+06	1.01865e+06
LIPID-P-0033	FA	CAR	314.234	313.225	[M+H]+	C17H31NO4	255715	949259	492038	1.10869e+06	982563	799504	420260	419040	262099	373724	495793	721881	693102	837758	613405	1.2607e+06	572611	672608	492121	308741	445651	727800	298167	637337	411744	910460	466184	431978	261223	757852	382445	542913	675073	486521	572907	387528	661508	589152	554001	663790	1.10492e+06	364288	723605
LIPID-P-0046	FA	CAR	312.218	311.21	[M+H]+	C17H29NO4	54973.7	200347	168482	210828	164743	284465	72870.4	62795.3	36752.8	78799.2	125608	132356	98103.8	248860	103054	308102	111159	127911	95864.1	59440.2	130360	206994	41362.1	123620	96463.1	198292	113402	128458	86986.1	114644	71231.5	80957.1	155989	96687.8	123304	94770.7	136514	101098	140109	114143	229265	64510.8	177910
LIPID-P-0016	FA	CAR	360.276	359.267	[M+H]+	C19H37NO5	78760.4	127433	105639	245175	329498	105334	98738	139870	73068.8	122632	64769.2	423532	66407.9	42848.3	156595	153757	117869	126512	110831	236224	52978.2	81029.4	49916.9	74965.8	66105.7	131625	77556.9	86478.5	68817.2	157543	64165.5	95749.6	82983.4	99629.6	111408	90931.5	156395	189399	104326	165847	171120	141425	124543
LIPID-P-0014	FA	CAR	344.281	343.272	[M+H]+	C19H37NO4	577932	428974	401230	631510	1.05165e+06	268854	432506	565802	424094	331576	187106	321726	180619	128751	513910	286540	449837	433776	321924	587709	103850	165451	319139	278773	136462	424470	381477	438307	347197	960826	404220	394895	366904	457321	458987	384323	595626	737618	337262	689028	622678	722322	392579
LIPID-P-0035	FA	CAR	342.265	341.257	[M+H]+	C19H35NO4	397350	607344	382474	1.97449e+06	2.01414e+06	520809	717491	607396	569369	509700	387504	703797	403814	313794	1.33033e+06	671237	599469	704993	729471	917749	228181	367758	271001	569564	360549	537681	419591	265188	210614	644235	242289	298882	357337	402185	432531	296594	344756	530586	317206	387624	715708	344190	469857
LIPID-P-0019	FA	CAR	374.255	373.246	[M+H]+	C19H35NO6	9228.74	32739.8	15051	16896.9	12942.4	38584.7	6211.48	11273.2	8645.52	8215.7	8601.89	11701.1	5947.31	6527.96	5029.8	20626.8	5978.13	20753.1	6639.34	10117.8	5514.05	8480.49	6859.55	11517.7	5995.07	8419.64	13698.4	3848.98	1921.63	4836.51	9086.7	8353.94	7693.21	4278.16	3775.98	7448.8	4144.25	6947.36	5651.28	6300.69	24511.5	2903.05	2600.34
LIPID-P-0036	FA	CAR	358.26	357.252	[M+H]+	C19H35NO5	11540.1	99874.3	38519	134614	162870	96559.8	52126	67685.3	31620.5	75553.8	50013	114805	40825.4	55563.6	65194.7	151568	54896.8	67443.1	59837.9	82256.4	42978.4	85256	18976.2	53093.4	50722.1	82320.2	45412.9	42327.4	28878.4	61304.7	26940.8	66291.8	94891.3	74002.3	64692.4	68288.6	58254.1	64900.4	60488.4	62298	86831.7	33040.1	68486.9
LIPID-P-0015	FA	CAR	358.295	357.288	[M+H]+	C20H39NO4	291530	739681	451334	473447	109889	958498	32193.4	125410	166375	70095.3	86398.5	62327.7	34257	42107.4	113926	244240	73015.7	437343	75452.3	170119	22772.2	61387.8	146499	134016	40906	56276.3	418882	56282	44824.1	123567	302853	100407	42660.1	55056.1	57855.8	50091.1	37772.2	82278.9	44035.8	118038	623122	44374.3	51042.4
LIPID-P-0020	FA	CAR	388.307	387.298	[M+H]+	C21H41NO5	18006.3	14718	27617	45210.5	69969.1	12851.7	30717.2	26570.8	19575.5	32535.4	16622.7	21859.1	18928.2	10770.4	40525.6	42972.4	32826.9	31079.4	28566.1	68394.9	16113.8	18693	14404.3	19310.5	10670.9	22902.8	26276.3	19884	22294.6	44574.1	15639.6	22749.9	19136.5	29597.1	26834.6	23036.8	24412.5	31743.3	21889.2	25765.5	46564.2	24578.8	24584.8
LIPID-P-0017	FA	CAR	372.313	371.304	[M+H]+	C21H41NO4	892273	1.04523e+06	801044	1.13272e+06	3.54427e+06	792817	1.33426e+06	1.26758e+06	3.19533e+06	1.17416e+06	591776	834968	375932	383232	930783	921392	712697	1.43934e+06	881617	1.68617e+06	237037	372891	730704	834161	461455	788924	1.39279e+06	677799	672251	2.34518e+06	826145	815832	664746	826659	944073	801665	634770	954864	602365	1.10803e+06	1.0098e+06	1.16605e+06	577957
LIPID-P-0037	FA	CAR	370.297	369.288	[M+H]+	C21H39NO4	861149	1.01566e+06	1.25757e+06	1.69126e+06	3.43546e+06	928694	1.67303e+06	1.13397e+06	1.82749e+06	1.17782e+06	785618	1.2145e+06	585401	469971	1.99887e+06	891957	938277	1.34873e+06	1.05458e+06	1.52158e+06	603389	887261	736242	997958	724535	1.63435e+06	954606	624642	512643	2.00877e+06	668205	1.03582e+06	798449	1.2402e+06	986179	908840	739746	1.67022e+06	715009	1.0869e+06	1.87295e+06	1.01224e+06	1.19944e+06
LIPID-P-0038	FA	CAR	386.292	385.283	[M+H]+	C21H39NO5	53776.7	82396.5	86577	178904	145170	85951.2	43036.7	81912.3	33048.6	80898.2	70487.5	32102.9	30691.4	46332.2	121404	134350	68394	93459.9	80503	123354	48501.3	109746	21121.6	60522.7	63669.3	69265.5	54159.6	47198.6	39142.7	77352.1	51755.2	87194.8	52333.5	171890	54293.4	43672.5	58209.1	116344	43661.4	57632	106946	56533.7	89266.7
LIPID-P-0047	FA	CAR	368.281	367.272	[M+H]+	C21H37NO4	331963	366899	392089	372110	712485	407237	376071	279897	500466	293455	303206	385696	163963	325172	394207	498326	234780	285778	161762	285008	288078	487482	172786	417825	388184	786832	387810	296881	239922	597090	230128	425144	415226	303213	464927	399519	255211	416891	337154	381955	614847	347692	267893
LIPID-P-0018	FA	CAR	386.325	385.319	[M+H]+	C22H43NO4	61392.3	111153	80272.7	175836	229569	105491	61557.3	116184	226243	53377.8	75423.9	62898.7	37184.3	48489	99707.4	130217	55136.1	164905	54767.2	115000	36885.4	52576.8	63087.2	127975	60181.8	62462.4	215247	59136.6	34243.9	132606	108090	58844.1	58917.3	63188.5	67597	53279.6	33670.8	77808.3	61283.8	67607	179643	54661.1	43578.1
LIPID-P-0022	FA	CAR	416.339	415.33	[M+H]+	C23H45NO5	24631.6	33073.2	32825.3	72607.7	114807	30389.9	36398.3	35241.5	49080.3	60138	30626.6	38410.9	18346.6	12737.8	43133.3	40073.8	31983.6	40029.9	36614.5	92279.4	15012.4	19291.9	15343.7	27767.3	20386.2	22605.3	32574.9	19269	20704.1	36932.8	13385.8	16577.6	15895.4	23409	29702.5	25226.7	16947.4	26521.4	21001	21818.1	46254.4	26282.9	26176.9
LIPID-P-0021	FA	CAR	400.344	399.335	[M+H]+	C23H45NO4	3.51078e+06	5.17598e+06	3.92199e+06	4.78517e+06	1.6657e+07	4.52068e+06	6.69228e+06	6.57891e+06	1.37761e+07	5.93526e+06	4.09145e+06	4.49846e+06	2.82368e+06	3.31234e+06	5.61973e+06	7.31131e+06	3.40026e+06	7.28443e+06	5.52614e+06	1.0005e+07	1.5201e+06	2.43463e+06	3.49011e+06	5.14573e+06	3.07721e+06	3.09412e+06	6.51878e+06	2.73451e+06	2.7186e+06	1.03172e+07	2.48277e+06	2.19006e+06	3.38592e+06	4.53222e+06	3.9588e+06	3.04825e+06	1.97415e+06	4.00486e+06	3.01616e+06	3.83635e+06	4.24297e+06	3.82189e+06	2.82298e+06
LIPID-P-0039	FA	CAR	398.328	397.319	[M+H]+	C23H43NO4	1.14064e+06	1.74374e+06	1.07547e+06	1.67952e+06	5.20211e+06	1.27093e+06	2.56336e+06	2.06731e+06	3.16474e+06	1.7694e+06	1.07794e+06	1.79005e+06	870395	663355	2.19156e+06	1.89872e+06	913811	2.3543e+06	1.76122e+06	3.01459e+06	378789	634543	1.09467e+06	1.45278e+06	865510	1.2057e+06	1.55352e+06	592744	762417	2.89462e+06	578155	694197	772394	1.1572e+06	964627	811220	450824	1.23233e+06	574141	1.0243e+06	1.07762e+06	1.01541e+06	656239
LIPID-P-0048	FA	CAR	396.313	395.304	[M+H]+	C23H41NO4	163501	176364	185098	193033	385321	206778	210724	126397	401568	194059	166886	196107	67864.9	182962	171021	258855	100059	158202	89214.6	130199	155288	243364	105864	243891	246127	417300	209098	166109	172623	381323	118416	221470	181307	155834	227691	215259	85249.4	169275	183828	179282	292934	184511	124939
LIPID-P-1298	FA	CAR	394.296	393.288	[M+H]+	C23H39NO4	93765.9	93487.8	97361.5	196470	211406	140180	129452	131662	169693	100195	124741	167230	81229.1	132544	154211	172052	119856	126950	78721.4	150574	86280.9	127042	85351.2	162195	135085	191990	122494	85282.7	56928.8	172164	96268.3	122981	113894	131378	128447	107342	86238.3	135528	120990	113961	196688	101802	101955
LIPID-P-1282	FA	CAR	414.358	413.351	[M+H]+	C24H47NO4	35523	46540.8	44587.1	40249	91998	38955.3	37280.1	46076.4	130947	30453.7	37281.9	32406.6	18518.9	35737.4	40674.4	52996.9	31813.5	63729.6	29075.8	57613.5	19273.3	31740.4	29028.8	51141.5	33782.9	31088.1	72628.8	31570.7	19504.7	68492.8	34437.8	31401.5	38480.9	37409.4	42221.7	26201.8	21054.3	48936.7	36991.6	30709.6	43502.5	36777	28817.4
LIPID-P-1290	FA	CAR	412.343	411.335	[M+H]+	C24H45NO4	28089	49831.9	31078.3	28624	76899.4	32889	26825.9	43907.3	90717.6	23635.2	21269.3	29003.1	13994.6	23999.7	34335.9	36739.6	15343.6	51962.4	26885.6	38787	11078.8	18601.4	28668.5	36453.1	31366.3	23282.4	58772.3	25544.1	18222.8	72629.7	33472.1	28686.9	26560.1	24949.4	33729.3	19554	13532.6	33647.1	15818.8	23189.6	35008.8	27267.2	16128.7
LIPID-P-0025	FA	CAR	444.37	443.361	[M+H]+	C25H49NO5	13278.9	19450	22052.2	31833.4	64668.2	25263.4	31353.3	22612.4	22321	48327.1	27036.6	26934	18772	16759.2	33009.8	49896.4	19903.7	27985.9	37270.1	43591.7	17927.9	19041.1	15011.9	19328	18318.3	24769.1	31687.8	16775.3	15261.1	30863.7	14456	19517.8	17516.8	19626.7	24718.2	23624.2	18413.1	24929.3	20334.8	19269.6	41869.1	23918	22318.9
LIPID-P-0023	FA	CAR	428.375	427.366	[M+H]+	C25H49NO4	855000	957022	1.12263e+06	1.16039e+06	2.76277e+06	1.25372e+06	1.71276e+06	1.2e+06	2.48806e+06	1.24661e+06	1.08721e+06	888078	627703	979061	1.12597e+06	1.39213e+06	837148	1.50713e+06	1.00589e+06	1.79819e+06	512226	765507	649075	1.15099e+06	922186	872841	1.39868e+06	708377	599345	1.80692e+06	632705	631798	1.02064e+06	970655	1.04663e+06	850321	481289	1.19457e+06	866896	858657	1.03429e+06	935964	653810
LIPID-P-0042	FA	CAR	426.36	425.351	[M+H]+	C25H47NO4	6.22188e+06	9.80014e+06	1.14093e+07	2.94068e+06	1.4435e+07	4.91906e+06	9.17401e+06	6.18925e+06	8.55383e+06	4.10542e+06	3.54502e+06	3.92708e+06	3.34108e+06	3.3043e+06	7.28866e+06	6.44106e+06	3.74649e+06	8.6973e+06	5.32941e+06	5.6034e+06	2.72806e+06	5.34324e+06	6.02277e+06	4.36374e+06	3.83974e+06	6.54196e+06	7.14577e+06	5.31437e+06	3.92818e+06	1.69857e+07	5.89454e+06	7.76075e+06	7.17009e+06	1.18817e+07	7.75685e+06	4.75656e+06	3.40328e+06	1.39457e+07	5.23462e+06	8.921e+06	6.60465e+06	7.97364e+06	5.13036e+06
LIPID-P-0045	FA	CAR	442.355	441.345	[M+H]+	C25H47NO5	24311.8	40584.5	39601.2	45260.6	103544	26331.3	43793.1	21783.1	25198.5	38592.6	22671.7	24547.8	16996	13043.4	43259.7	31432.7	29115.2	36843.8	33898.2	60084.7	17457	31404	16407.7	20549	15813.2	31925.3	20852.5	18551.4	20098.1	33902	16584.6	23377.7	14068.4	32049.5	28879.3	24391	18286.1	38889.7	17293.3	22327.7	41473.2	29056.3	29181.9
LIPID-P-0049	FA	CAR	424.344	423.335	[M+H]+	C25H45NO4	3.83546e+06	4.89873e+06	5.24811e+06	1.21721e+06	4.58997e+06	2.91523e+06	3.44044e+06	2.4162e+06	5.49855e+06	1.58656e+06	2.23763e+06	2.74863e+06	1.34434e+06	4.46521e+06	2.55837e+06	6.20408e+06	1.23048e+06	2.92738e+06	1.23137e+06	1.36935e+06	2.43681e+06	5.31163e+06	2.19364e+06	3.71331e+06	5.29964e+06	5.1529e+06	5.50246e+06	4.92852e+06	3.49908e+06	9.36661e+06	3.66326e+06	6.7626e+06	6.9663e+06	5.13292e+06	6.07389e+06	3.40062e+06	1.77305e+06	3.87636e+06	4.16932e+06	4.90556e+06	3.97423e+06	4.19174e+06	2.25747e+06
LIPID-P-1299	FA	CAR	422.327	421.319	[M+H]+	C25H43NO4	126974	149867	188490	63698.6	186266	119126	111222	101203	173485	76379.3	97385.4	106662	50089.8	181941	94068.8	246643	48826.5	111427	42091.7	61087.4	88855.4	207685	79724.3	151571	226578	203565	272150	178089	131146	311820	158006	262609	208631	194574	212443	126481	51181	98935	150749	143841	159437	134574	104227
LIPID-P-0024	FA	CAR	456.404	455.397	[M+H]+	C27H53NO4	12357.8	14969.7	22920.8	12698.5	22813	27664	19303.8	12505.6	12891.8	22931.1	20434.1	16719.7	13572.4	14194.8	19909.2	29374.1	17441.2	20506.8	20709.2	17622	13147.2	18959.2	12558	13405.2	13348.9	19180.2	20332.3	14198	14821.9	22332	8067.44	11951	19544.6	18362.8	16026.5	19390.5	12784.9	26514.2	16749.8	10905.1	21299.2	13794.5	17946.5
LIPID-P-0050	FA	CAR	452.374	451.366	[M+H]+	C27H49NO4	57762.4	73092.4	83185.6	56154.1	108721	80423	82123.3	76911.3	172001	58527.4	60460.7	66154.3	51807.5	92074.6	63021	107473	41925	76010	58152	82194.5	45853.4	89796.9	57411.8	78072.9	74814.7	78485.4	99550.3	69379.8	74699.1	189430	72241.9	93175.7	93338.7	120631	97778.8	76230.1	42060.1	80169	64327.1	118497	65104.1	97337.2	59136.1
LIPID-P-1300	FA	CAR	450.358	449.351	[M+H]+	C27H47NO4	96338.6	84192.8	107036	94310.4	134645	74993.4	126021	138314	278474	75023	69692.6	106621	63035.3	110621	80488.9	130205	46334.8	106716	61570.3	148798	49574.6	106177	143638	132315	162322	109193	202875	89253.7	84205.1	337989	86061.2	132924	123566	251088	109058	73427.3	59316.3	87566.2	82627.4	182335	94923	116240	61144.8
LIPID-P-1302	FA	CAR	448.343	447.335	[M+H]+	C27H45NO4	134062	118826	132304	114369	229369	106342	188388	200671	484651	84596.9	73736.2	218018	98744.8	144249	154710	183054	63533.2	132720	87247.1	166025	54900.8	145032	198834	183475	197026	160108	304691	103788	85214.8	520181	159725	182292	196706	343507	156332	93854.9	65637.4	126298	104379	249672	150035	195726	75586.5
LIPID-P-1304	FA	CAR	446.327	445.319	[M+H]+	C27H43NO4	21350.2	37200.9	31235.2	9393.2	14248.6	44974.6	8589.34	5208.43	17554.6	7190.59	6276.4	7153.55	5039.05	8467.4	10298.1	13480.1	6400.05	17773.1	3369.06	15521.5	2108.35	5783.84	7393.86	6879.78	7852.2	10391.8	19257.8	4703.35	4519.85	22375.2	11907.7	12296.7	7489.45	15583	7804.95	2843.63	1990.5	6200.62	4216.31	10799.8	33636.9	7387.15	5739.72
LIPID-P-1284	FA	CAR	484.437	483.429	[M+H]+	C29H57NO4	5232.73	7066.14	12861.5	3934.36	6065.35	9281.6	8672.51	5433.19	3210.57	10323.1	6143.03	2095.62	4814.43	7348.27	5853.72	8801	9998.44	13009.3	7540	6703.13	9443.04	8446.36	4667.44	4982.59	8447.19	11190.4	7307.15	8387.81	6806.03	11010.9	6213.68	9365.83	10903.9	8198.92	7195.07	8031.59	9564.71	21967	9170.39	3835.27	7066.05	6070.21	8714.27
LIPID-P-0044	FA	CAR	482.419	481.413	[M+H]+	C29H55NO4	31362.7	29109.2	56642.9	31927.8	27985.6	64478.8	39035.2	32299.8	20360.1	27267.5	44686	41037.4	20025.8	40964.4	25844.1	44231.9	33244.6	28492	23182.4	33799	38640.9	44955.3	17909.1	31663	29903.4	41815	30079	46283.8	41433.9	26929	23438	38135.9	35607.8	26488.6	37049.1	43426.9	23697.9	19500.5	32386.2	21472.5	37523.3	23645.1	33300.6
LIPID-P-1303	FA	CAR	476.374	475.366	[M+H]+	C29H49NO4	14080.5	14513.8	11011.1	16245.4	21497.6	11309.3	19730.8	20408	50741.6	14633.7	10875.9	22115.1	10733.5	16981.8	14060.5	21528.3	9488.55	11189.1	8753.22	18130.6	5426.51	16451.4	26727.2	20515.6	18034.5	11135.4	28867.7	9009.38	7750.74	61198.2	15266.1	16695.1	19102.3	38667.4	18449.9	9559.53	8024.64	15021.5	13735.4	29560.3	17421.9	20386.2	11042.4
LIPID-P-1307	FA	CAR	472.343	471.335	[M+H]+	C29H45NO4	25411.2	21602.9	21477.4	43666.5	33707.2	34426.3	26980.7	16288.9	50222.7	14131	12140.1	19018.9	12398.6	13231	32341.7	24830	16438.4	31607.7	13103.2	40127.7	4755.72	11183.5	27094.6	31601.2	8042.35	27939.3	24096.5	6422.28	6677.57	45830.1	13103.4	17544.9	16111.8	26742.2	14122	9260.62	7580.87	15878.7	11848.2	30343.1	25595.1	19466.1	17454.8
LIPID-P-0002	FA	CAR	204.124	203.116	[M+H]+	C9H17NO4	2.67911e+06	2.62292e+06	2.75204e+06	4.10514e+06	6.16483e+06	1.8242e+06	2.43475e+06	4.95762e+06	2.96466e+06	923079	1.92494e+06	3.08118e+06	3.73534e+06	2.24231e+06	4.6493e+06	4.61937e+06	3.53307e+06	844024	3.14262e+06	4.39577e+06	4.10814e+06	4.58627e+06	1.86578e+06	3.77679e+06	5.46513e+06	7.83328e+06	3.4498e+06	4.63905e+06	3.12449e+06	7.46095e+06	3.07421e+06	5.84162e+06	1.98968e+06	3.34531e+06	2.65766e+06	2.54671e+06	5.14787e+06	4.7757e+06	3.5378e+06	3.932e+06	3.85425e+06	4.598e+06	5.3949e+06
LIPID-P-0003	FA	CAR	218.14	217.131	[M+H]+	C10H19NO4	304621	455853	524113	638794	448234	507445	287290	439347	665031	218393	347429	383466	304178	567408	249937	638270	349630	97827.4	174225	763310	472755	526130	125476	401058	525787	569605	265256	447798	378672	429814	158438	486764	204406	260060	306826	177373	349071	306748	328638	294987	371751	401131	392241
LIPID-P-0026	FA	CAR	248.113	247.106	[M+H]+	C10H17NO6	25981.8	27418.6	38383.2	52072.7	41853.8	29654.6	22463.8	22822.1	45190	24978.6	21535	24441.2	18951.5	22423.1	32734.5	44571.1	27610.1	4340.46	22162.7	106665	37068.9	55772.9	5755.78	14703.9	33421.3	72272.9	30823	55203.4	31436.8	45968.9	21286.1	38629	20619.8	19460.7	25335.2	24306.9	51017.1	40222.2	24995.3	27298.9	27954.5	38431	42288.4
LIPID-P-0006	FA	CAR	248.15	247.142	[M+H]+	C11H21NO5	29941.4	29676.8	42260.2	61691	52688.4	35345.9	24704.1	21816.6	46752.4	28379.4	27604.8	26483	26850.9	27349.3	35321.7	55275.7	27360.3	7892.55	25334	114006	40285.3	64836.6	21014.9	30684.9	36123.8	76944.4	35548.2	64640.3	33782.9	52442.4	23202.7	44394	22561.9	31312.5	28546.9	25948.6	58475.1	44066.2	29468.4	31606	33302	42888.6	41831
LIPID-P-0004	FA	CAR	232.155	231.147	[M+H]+	C11H21NO4	249326	293847	303499	640602	382343	319568	213983	321526	443004	194885	158208	342616	201749	303883	215750	395504	185873	97950.2	152128	380802	279020	365780	94536.6	298574	518955	475849	204937	317434	257091	343218	166313	362532	152761	166631	232972	241333	286679	282541	306241	265450	312223	290698	208703
LIPID-P-0027	FA	CAR	262.129	261.121	[M+H]+	C11H19NO6	58663.1	83003.3	70070.4	80743.6	78584.2	82967.2	42509.5	69190	54755.7	48150.2	48030.7	74152.8	68262.8	66380.8	64367.3	170540	49084.2	23859.8	65972.6	87032.7	68262.8	77782.1	40407.4	64598.5	83506.5	92377.4	55255.4	74272	74826.3	53712.4	49732.7	69670.5	44785.9	66500.1	58263	73249	41270.1	68595.2	69864.3	70335.2	56297.9	50844.9	56293.6
LIPID-P-0008	FA	CAR	262.166	261.158	[M+H]+	C12H23NO5	54835	78374.3	68891.1	82004.1	73118.7	70242.4	36027.3	66375.4	51934.7	43945	41451.3	66020.5	61491.6	63498	55562.7	148821	48338	29576.1	65314.9	81011.9	60573.9	72664.5	38563.1	63732.5	81963.9	88687.8	50813.6	73746.1	67462.4	49672	45136	59527.8	43250.8	60095.8	54973.9	72947	41931.1	63400.7	64022.1	65887.9	51212.1	46072.9	50844.9
LIPID-P-0028	FA	CAR	244.155	243.147	[M+H]+	C12H21NO4	31318.7	30785.6	39674.5	44267.7	25610.7	30173.7	22744.3	31737.6	27192	20536.3	19978.9	37312	21593.1	25074.1	23210.9	25146.6	16927.5	14406.7	18512.4	26928.4	29658.9	33387.1	15340.5	21266.8	23240.6	31178.7	18750.3	25055.2	20490.5	23095.9	16093.5	26369.4	19741	22378.3	22861.5	22825.8	23807.8	18122.8	22804.2	22854.7	27809.8	23155.9	25794.3
LIPID-P-0011	FA	CAR	290.161	289.153	[M+H]+	C13H23NO6	372477	406937	436162	386322	473722	396308	405589	389549	398422	499379	402984	421671	430828	389815	390657	384580	394226	416991	369691	416020	442261	415678	414872	471904	473019	420988	350947	423301	348957	373329	371530	340603	380529	433566	321165	369041	396809	404060	370130	422458	390882	395165	375840
LIPID-P-0009	FA	CAR	276.182	275.173	[M+H]+	C13H25NO5	21187.1	20911.9	25238.5	35486.5	34887.9	29238.1	15777.7	22861.4	21332.4	15182	20226.3	26387	21542.7	22408.5	28498.3	50388.7	25670.6	8218.13	38426.9	37960.5	31392.2	70140.7	10796.3	17498.4	23315.2	57082.3	29129	40223.3	21543.2	30726.3	16848.3	24759.7	21516.8	16073.9	22703.9	21464.6	59843.7	40076.3	25675.4	34956.5	35813.6	25192.7	36043.5
LIPID-P-0007	FA	CAR	260.187	259.178	[M+H]+	C13H25NO4	174253	202724	157155	165305	241651	109203	112733	107872	75730.8	85950.8	80929.8	107799	187774	104717	195842	137593	123657	68245	127599	122262	231593	260797	49590.8	129256	184183	248072	107937	214459	118921	188417	76534.5	220489	117259	76008	148701	101805	249104	198132	162696	164853	295355	179230	130062
LIPID-P-0029	FA	CAR	258.171	257.163	[M+H]+	C13H23NO4	32106.5	103919	82888.3	52005.8	25973	118988	13792.1	14979.9	19068.7	6698.3	8869.41	16925	13155.4	18670.6	17428.5	26495.7	17100.3	9291.08	12824.5	16694	21059.5	20162.8	8118.65	14006.7	23253.9	31960	25593.6	21676.2	15555.4	21098.8	15937	38084.3	17536.7	13377.2	17243.7	11802.2	37104.4	19728.5	13487	18794.7	48650.9	18703.3	19837
LIPID-P-0010	FA	CAR	288.218	287.21	[M+H]+	C15H29NO4	494504	1.11574e+06	606207	832677	1.12721e+06	1.08675e+06	675588	438472	408797	494445	464023	723244	1.10354e+06	931812	952740	1.04961e+06	684942	454572	638537	506824	1.36665e+06	1.57447e+06	327924	720952	1.02891e+06	1.28844e+06	591133	996489	549795	724807	304278	884858	869957	398619	912763	587031	1.0671e+06	873802	931081	955974	1.30172e+06	652286	579679
LIPID-P-0031	FA	CAR	286.203	285.194	[M+H]+	C15H27NO4	748602	1.80788e+06	1.77983e+06	3.87199e+06	1.81493e+06	2.4597e+06	762239	685729	304897	509447	1.34247e+06	961994	893722	2.01313e+06	1.09465e+06	3.01832e+06	1.24355e+06	746956	730872	737504	1.71315e+06	2.90009e+06	306027	1.31144e+06	1.34827e+06	3.20111e+06	2.17771e+06	1.50767e+06	1.44468e+06	1.19598e+06	806904	721842	1.45177e+06	807274	1.18848e+06	870029	2.80344e+06	1.43257e+06	1.5869e+06	1.15419e+06	1.68355e+06	1.08343e+06	2.14356e+06
LIPID-P-0032	FA	CAR	302.197	301.189	[M+H]+	C15H27NO5	50050.5	266105	216839	190205	137951	322122	88385.6	132608	46763.7	45311.5	56915.3	85507.4	140849	73399.3	72878	138246	60567.5	201785	72590.8	55186.2	51885.1	137890	51627.6	105280	60488.8	157019	393424	88548	63823	130853	227075	95634.4	76588.9	131318	129784	86740.9	96415.2	121438	146769	105815	354121	56196	96173.5
LIPID-P-0012	FA	CAR	302.233	301.225	[M+H]+	C16H31NO4	66330.9	354369	284636	237247	197657	431033	110199	160413	55694.7	57620.4	78796.1	113323	193987	81798.1	92152.6	196287	70987.1	279457	93184.3	74937.3	81183.4	197960	66781.2	153097	79489.1	211654	519052	119739	79376.8	181424	301930	124496	106113	171041	158706	121604	133234	160112	194707	134938	514864	80107.8	131962
LIPID-P-2037	SP	Cer-NS	448.415	465.418	[M-H2O+H]+	C29H55NO3	21322.5	41433.5	15911.4	44404.2	83303.7	11905.3	14507.5	23428.9	16859.8	16197	22207.8	15257	10075.9	19094.4	15617.6	19746.5	12742.9	73359.9	16860.9	14385	18527.6	22886.1	13290.4	15825.5	14275.8	39429.8	51662.8	71774.7	19534.4	29320.8	31825.6	12745.2	16193.5	20028.4	15748.7	16581.2	17169.1	10544.1	20223.6	19016.9	35154.8	30289.5	17711.2
LIPID-P-2005	SP	Cer-NDS	522.524	539.528	[M-H2O+H]+	C34H69NO3	34544.4	52153.7	50287.4	15357.6	26323.9	31332.3	25616.1	20683	28907.1	29438.4	21816.6	19921.1	19678.6	22094.6	20922	16117.7	19349.6	20499.3	19745.2	27458.8	45682.9	49838.6	9346.89	19981.9	35088.2	30356.4	13922.3	54285.2	24521.5	33401.6	27923.4	48887.1	36540.5	17281.6	42620.4	34544.4	14401.1	50856.1	35243.1	29615.3	59461.6	23817.6	29431.4
LIPID-P-2009	SP	Cer-NDS	534.524	551.528	[M-H2O+H]+	C35H69NO3	4.70008e+06	4.00428e+06	3.39e+06	3.82132e+06	3.43949e+06	3.76279e+06	3.71451e+06	4.28857e+06	5.31484e+06	4.14782e+06	3.51148e+06	4.30201e+06	3.72847e+06	2.95824e+06	2.87521e+06	2.6487e+06	3.32501e+06	3.54523e+06	3.98095e+06	3.99067e+06	2.11597e+06	2.583e+06	3.29594e+06	3.45359e+06	2.78344e+06	2.32887e+06	3.35753e+06	2.43319e+06	2.13111e+06	2.48991e+06	3.09595e+06	2.64887e+06	2.84494e+06	3.45087e+06	2.60133e+06	2.77166e+06	3.02933e+06	2.9305e+06	2.77893e+06	2.49439e+06	2.27301e+06	2.91634e+06	2.86458e+06
LIPID-P-2011	SP	Cer-NDS	548.54	565.543	[M-H2O+H]+	C36H71NO3	29437.7	32331.4	29794.9	25636.2	31157.6	23231.3	37083.5	34957.9	32687.4	24167.8	25316.1	28360.7	25751.9	21801.8	27086.3	28901.6	27798.7	29586.7	34652.5	24198.1	20952.9	24004.4	32305.2	33872.9	23664.1	28360.7	23940.9	25630.2	28633.9	19685.2	31949.3	26726.2	30499.3	25410	34971.3	17288.7	36280.4	16755.8	26377.4	23046.5	22513	26011.5	31184.8
LIPID-P-0126	SP	Cer-NS	492.478	509.481	[M-H2O+H]+	C32H63NO3	42546.6	31647.2	41239.4	25761.7	27353.7	26190.5	34670	38636.7	60775.4	34573.3	34402.7	13987	39623.2	28652.8	35263	40673.7	46887	30349.8	30389.4	37766.4	52896.2	51279.3	20531.6	26916.3	35597.1	37881.3	42971.8	53455.4	55123.8	41529.9	40851.7	101156	73797.5	22297.5	68487.8	61641.8	57797.8	82802.2	78541.4	36899.4	43285.5	37715.6	25694.2
LIPID-P-0127	SP	Cer-NS	520.509	537.512	[M-H2O+H]+	C34H67NO3	49505.8	40073.6	38020.9	24189.9	53811.1	25277.6	45382.4	49731.3	34790.1	23296.7	51794.3	21802.6	31251.7	38407.2	38038.8	44094.1	38878.2	46855.2	33430.5	43482.3	38091.2	33000.5	41290.7	38110.2	52072.6	35899.5	37236.1	44179.5	39676.1	50973.5	35963.1	54976.2	49147.8	11294.7	52049.6	54969.2	56991.5	99343.6	70450.5	35623.5	34373.2	42748	42492.9
LIPID-P-0128	SP	Cer-NS	548.54	565.543	[M-H2O+H]+	C36H71NO3	126249	138020	170154	59425.9	89059	55183.4	116230	92054.7	84580.9	86244.3	78287.7	53383.5	83950.3	113092	114548	105794	112763	75731.2	95631.8	107034	130082	133153	66954.2	76716.3	137673	152984	107166	219972	165624	124825	87353.1	250576	135160	75628.9	242328	170065	144483	315251	252458	147830	182143	138002	179032
LIPID-P-0129	SP	Cer-NS	576.571	593.575	[M-H2O+H]+	C38H75NO3	372981	298515	417107	93027.8	248465	144811	427952	241219	155096	156557	134253	125270	256057	225464	299495	237066	439307	225794	187254	193293	440077	581228	191128	115893	289247	715448	269689	735234	631842	281543	203274	1.01866e+06	468374	205244	922421	599834	539885	1.07834e+06	894926	388462	446525	317866	420926
LIPID-P-0130	SP	Cer-NS	590.587	607.59	[M-H2O+H]+	C39H77NO3	284363	182694	337505	40420.1	185404	96923.6	483039	197969	77931.4	127469	46090.7	51986.5	254487	86478.5	322949	149547	381493	121162	167806	89846.3	414765	591675	140183	76199.3	160717	541309	296168	855881	596576	241152	156906	831963	419170	218989	1.0222e+06	586335	659333	1.29203e+06	1.04774e+06	464925	462484	433477	354272
LIPID-P-0131	SP	Cer-NS	604.603	621.606	[M-H2O+H]+	C40H79NO3	1.08478e+06	767357	964936	246603	571861	624004	1.30781e+06	798196	391696	667688	406452	477549	595054	628271	718946	800434	1.1196e+06	657997	579232	523446	888656	1.44687e+06	555180	410348	796306	1.51243e+06	678498	1.66878e+06	1.38388e+06	764567	546047	2.33352e+06	1.07027e+06	601527	2.27752e+06	1.34296e+06	1.34562e+06	2.21351e+06	2.24611e+06	1.10722e+06	1.04291e+06	816470	1.27687e+06
LIPID-P-0132	SP	Cer-NS	602.587	619.59	[M-H2O+H]+	C40H77NO3	149310	140179	188890	87166.2	106253	138802	169593	115787	206646	133341	102620	102838	85986.6	198485	124745	179249	170572	96288.8	117098	118627	131360	135103	74728.5	81425.9	242234	137768	92797.9	204129	176808	135726	103649	210692	124680	107064	217176	237603	211935	319446	233887	170779	132261	106176	204481
LIPID-P-2051	SP	Cer-NS	506.493	523.496	[M-H2O+H]+	C33H65NO3	131406	121522	97005.6	56595.1	101681	79089.5	125000	77365.7	139595	96859	89763.5	61666.5	51099.3	100393	121537	143987	88317.3	68320.3	83463.7	81781.6	114945	149878	72970.5	80657.8	123706	116397	68989.2	107572	104241	108000	85697.5	183616	136310	59607.7	162381	159163	94445.6	179800	147785	86105.4	110339	92680.8	89390
LIPID-P-2053	SP	Cer-NS	534.524	551.528	[M-H2O+H]+	C35H69NO3	17380.1	24675.8	21667.1	20075.8	26473	17361.1	25967.7	34531.5	25304.6	20995.8	18295.2	19265.5	16352.5	18164.5	25600.6	27916.2	21700.1	14290.1	25447.9	20335	14681.6	21028.5	19701.3	19983.3	21388	16837.1	17950.4	32173.4	17793.2	21584.4	11384.7	31258.7	15168.3	17279.7	30733.3	20396.3	16465.7	40570.3	36229.1	25283	20013.1	21342.4	27621.8
LIPID-P-2060	SP	Cer-NS	602.587	619.59	[M-H2O+H]+	C40H77NO3	81298.8	76792	77576.1	48853.7	72975.9	84071	92800.3	82217.9	105907	108828	58513.8	76510.2	48454.9	88914.1	71786.3	135059	77577	97621.3	83261.7	111885	53245.5	75695.4	49675.8	56890	95557.1	80108.3	54255.3	64137.7	66746.5	68526	33470.2	67846	55606.9	34924.3	80159.3	89774.4	52287.5	75435.1	89791.4	56098.3	61093.5	38513	72082.3
LIPID-P-2061	SP	Cer-NS	618.618	635.622	[M-H2O+H]+	C41H81NO3	77825.7	45866	53316.7	33031.2	42402	54971.2	54920.5	61225.3	43577	74704.9	49806.8	41454.4	17741.2	59181.1	90782.2	83220.3	70036.4	69957.5	41250.1	86367	49880.1	67981.9	42648	61108.2	84057	54279.5	55500.3	32898.1	50885.9	57115.6	40749.2	49032.4	40639.2	25775.4	39327.6	40583.9	63460.1	50395	45165.1	47076.2	41703.1	47229.9	41419.8
LIPID-P-2062	SP	Cer-NS	616.603	633.606	[M-H2O+H]+	C41H79NO3	164579	169361	189388	121450	115192	130047	138688	126989	216566	118651	106218	93197.9	103281	211140	145921	209181	172506	117782	127869	123109	147558	135733	82036.8	101721	266232	180410	107913	164545	139129	181047	96758.9	166290	98030	72521.4	172342	194187	145173	258848	188245	122642	100506	99823.6	203824
LIPID-P-2065	SP	Cer-NS	630.618	647.622	[M-H2O+H]+	C42H81NO3	390924	325658	344563	172824	292800	538184	551940	337454	272040	626893	258804	335368	172015	384616	360190	712731	343307	386134	375338	401592	215375	456325	268815	287285	461781	364135	257428	210185	260337	402216	140099	290235	321249	189103	311113	447788	242315	339723	381913	310904	261018	189505	367347
LIPID-P-2493	SP	Cer-AS	856.848	873.851	[M-H2O+H]+	C57H111NO4	19274.6	99477.5	45303.9	3765.23	18426.7	70304.4	24055.9	14587.5	3400.09	34218.7	44337.9	66241.7	13311.7	93212.8	14336.9	135609	37949.2	16694.4	13004.8	3023.53	140304	179573	9745.58	33853.2	56487.4	79273.5	51105.1	91380.8	80573.8	47850	19034.4	100005	94259.8	15430.2	73514.2	42189.6	37040.3	24512.6	89624.5	25050.8	79335.8	28616.1	115091
LIPID-P-2494	SP	Cer-AS	884.879	901.883	[M-H2O+H]+	C59H115NO4	23639.2	82711.7	67299.9	2582.78	26370.4	45212.3	48183.3	45487.4	3630.77	18208	42530.7	54688.8	48599.7	52474.1	21619.8	95309.2	42203.9	42527.2	3300.77	8239.86	176792	195522	27348.3	30589.6	16530.9	93381.8	26715	62858	74588.4	61540.6	28339.5	174159	110968	48886	99921	57547.9	74498.9	38485.5	87311.8	30756.7	92214.9	41788.3	161825
LIPID-P-2495	SP	Cer-AS	882.864	899.867	[M-H2O+H]+	C59H113NO4	20617.4	103645	84331.6	5482.52	23032.3	88373.5	16965.4	40938.8	295.471	38076.6	72562.9	105893	60895.6	133073	45828.9	146650	38993.7	22954.1	17191.4	4193.7	244479	313993	29704.2	54755.4	66841.1	147178	49633.4	95177.4	148408	59167.9	45788.7	290238	182724	47500	129110	79539.7	90545.8	41678	143334	42179.1	147164	53513.9	250274
LIPID-P-2497	SP	Cer-AS	880.848	897.851	[M-H2O+H]+	C59H111NO4	18311.6	64578.6	52794	1636.9	4097.03	60487.8	6652.5	17383.1	718.175	22764.1	67255.4	134436	9197.89	105284	6291.54	216715	17514.2	7514.08	3703.81	3529.11	147181	374900	1458.41	68170.3	45489.9	99148.2	26360.7	131016	108540	38208.6	12467	249305	75627.2	5471.01	82754	104775	8674.33	1449.89	133324	10559	74935.8	12090.2	74392.1
LIPID-P-0105	SP	Cer-NDS	606.618	623.622	[M-H2O+H]+	C40H81NO3	1.11958e+06	1.29808e+06	1.31752e+06	366203	508213	1.29051e+06	1.15272e+06	682966	287220	1.16531e+06	544767	1.60034e+06	404052	1.13223e+06	656692	1.05513e+06	686109	730076	524629	643791	873958	1.1436e+06	457675	547314	960424	1.03528e+06	834959	778788	864366	896202	400344	910976	1.12639e+06	682544	1.46955e+06	844680	574466	1.16561e+06	942666	625556	762559	449582	1.13339e+06
LIPID-P-0106	SP	Cer-NDS	634.65	651.653	[M-H2O+H]+	C42H85NO3	1.5655e+06	1.60596e+06	1.97139e+06	667813	919271	2.33138e+06	2.32309e+06	1.19211e+06	622061	2.1093e+06	876509	2.04391e+06	744901	1.58993e+06	1.29866e+06	2.14484e+06	1.31653e+06	1.43353e+06	1.09138e+06	1.33047e+06	1.40817e+06	1.87202e+06	966060	847538	1.80526e+06	1.69114e+06	1.16051e+06	1.02083e+06	1.3585e+06	1.74749e+06	616194	1.32034e+06	1.35739e+06	954677	1.8904e+06	1.10786e+06	983314	1.61428e+06	1.80289e+06	1.10188e+06	1.17301e+06	869044	1.45853e+06
LIPID-P-0107	SP	Cer-NDS	632.634	649.637	[M-H2O+H]+	C42H83NO3	83575	124729	171822	182869	90363.4	102165	100625	91346	126673	123928	82883.8	81078.8	77913.8	93745.6	80865	132118	105673	36814.4	50926	87204.5	176716	178029	30647.8	102745	97451.9	138972	70922.6	129654	65433.2	104656	62278.4	155287	61514.8	39329.7	148247	89603.3	76673.5	169012	114440	102130	55197.3	59293.8	153257
LIPID-P-2499	SP	Cer-AS	492.441	509.444	[M-H2O+H]+	C31H59NO4	113266	176962	148564	34424.9	75956.8	71616.7	101569	48907.6	78543.1	112015	95805.1	46183.7	51555.3	97947.5	76796.3	112176	123540	66164.5	64394.7	83788.8	97667.7	75681.5	52783.9	70630.8	72211.7	80831	60516.8	121559	132119	93092.8	167777	132799	78191	68144	122130	124606	113371	127080	102516	111760	85177.4	92808.9	143943
LIPID-P-0108	SP	Cer-NS	492.478	509.481	[M-H2O+H]+	C32H63NO3	48623.7	65457.6	43341.6	29699.5	57965	37279.9	42470	48086	56351.4	51587.9	31654.6	34681.4	33342.4	39073.1	33920.5	40769.4	39930.5	20578.1	51574	39931.8	34247.2	48235.2	28177.4	21825	39882.7	51380.6	46792.2	93833.7	78563.5	68326.2	88240.8	130537	77270.6	39052.8	70473.8	42508.4	69419.9	51498	85189.2	67179.6	51034.4	79768	46269.3
LIPID-P-2501	SP	Cer-AS	520.472	537.476	[M-H2O+H]+	C33H63NO4	1.58349e+06	3.03661e+06	2.34118e+06	1.21492e+06	1.35079e+06	2.06054e+06	1.75931e+06	1.17621e+06	1.30033e+06	2.23081e+06	1.88661e+06	1.95828e+06	1.40743e+06	2.68147e+06	1.20896e+06	1.57113e+06	1.88374e+06	1.9031e+06	1.57576e+06	2.1402e+06	2.13195e+06	2.45216e+06	952079	1.46336e+06	1.00387e+06	1.1996e+06	1.34357e+06	2.27715e+06	2.49113e+06	1.6486e+06	1.71058e+06	1.76516e+06	1.2752e+06	1.38912e+06	2827115	1.46971e+06	1.38898e+06	1.72289e+06	1.00082e+06	1.57132e+06	1.14736e+06	1.86998e+06	1.92989e+06
LIPID-P-0109	SP	Cer-NS	520.509	537.512	[M-H2O+H]+	C34H67NO3	1.36652e+06	2.30789e+06	1.91419e+06	1.04291e+06	1.8605e+06	1.74321e+06	1.17087e+06	1.27043e+06	1.71736e+06	1.75688e+06	1.31518e+06	1.06776e+06	902604	1.2902e+06	1.28871e+06	1.53823e+06	1.22087e+06	1.05903e+06	1.80631e+06	1.31911e+06	1.54579e+06	1.61794e+06	935053	972163	1.76565e+06	1.43664e+06	1.27207e+06	1.63727e+06	1.4592e+06	1.51013e+06	1.12901e+06	1.91114e+06	1.41938e+06	1.07134e+06	1.85116e+06	1.64733e+06	953507	1.59278e+06	1.83113e+06	1.26532e+06	1.77519e+06	1.1736e+06	1.18564e+06
LIPID-P-0111	SP	Cer-NS	548.54	565.543	[M-H2O+H]+	C36H71NO3	667220	1.44015e+06	979090	651834	1.27505e+06	941910	945064	798874	903144	987498	957224	717277	574278	844995	912608	1.40151e+06	695908	649511	988474	914795	767408	926402	528621	626495	1.09125e+06	746730	691407	850150	769068	872607	548577	895231	630734	399515	903406	1.11152e+06	528277	1.35454e+06	1.13857e+06	641815	1.11111e+06	648534	773339
LIPID-P-0113	SP	Cer-NS	576.571	593.575	[M-H2O+H]+	C38H75NO3	739105	1.41171e+06	1.45154e+06	427275	970180	1.02359e+06	858237	624612	496876	960487	644671	640055	444723	762591	791072	1.32677e+06	643918	552656	645174	746228	841109	830175	402008	435475	978393	827333	625346	1.16996e+06	895500	798509	535094	1.1156e+06	652755	416619	1.01445e+06	1.05369e+06	418917	1.24301e+06	1.13495e+06	704949	1e+06	684659	1.06246e+06
LIPID-P-0122	SP	Cer-NS	574.556	591.559	[M-H2O+H]+	C38H73NO3	33093.5	78743.7	84428.8	25038.3	29595	47934.4	41140.4	23308.3	29705.5	64726.7	40373.3	35962.3	11806.6	53651.8	36539.7	71989.7	27181.4	25351	18225.9	50747.7	76567	83157.4	19077.2	37183.8	76945.2	61306	46427	68736.9	75482.7	25411.5	23062.4	78711.2	70904.9	21649.1	71099.7	73648.8	27778.1	63587.2	85915.1	49800.4	46068.1	26795.8	49834.1
LIPID-P-2510	SP	Cer-AS	606.582	623.585	[M-H2O+H]+	C39H77NO4	212197	443064	386764	84994.3	194491	414280	184161	130716	101077	204150	142910	151392	96630.1	157303	164021	281526	175639	124001	136237	166172	241209	255726	106859	85000.7	155816	204552	119907	250935	241872	140883	112304	261584	196065	97316.1	241593	218593	124111	223490	260536	129920	252863	146946	195719
LIPID-P-0114	SP	Cer-NS	590.587	607.59	[M-H2O+H]+	C39H77NO3	148461	383031	386068	26979.6	118243	253074	66556.3	81614.2	39531	83677.4	69763.1	58308.4	60527.1	107666	106610	173519	83922.6	64165.8	64018.3	47187.8	180978	194610	50259.5	57454.5	117400	169064	105879	260847	176498	100516	71299	222978	122550	54545.9	194958	163433	54421.3	144676	201950	131113	179567	132930	160681
LIPID-P-0115	SP	Cer-NS	604.603	621.606	[M-H2O+H]+	C40H79NO3	7.98471e+06	1.74176e+07	1.64215e+07	3.49622e+06	7.14347e+06	1.67504e+07	8.34036e+06	5.69525e+06	4.05001e+06	9.23296e+06	6.16472e+06	5.52271e+06	4.04656e+06	7.38966e+06	6.37435e+06	1.17863e+07	7.27826e+06	5.13685e+06	5.55437e+06	5.96298e+06	1.00193e+07	1.11059e+07	3.8599e+06	3.94002e+06	7.94999e+06	1.00657e+07	5.39564e+06	1.16083e+07	9.06401e+06	6.19625e+06	4.08202e+06	1.11287e+07	7.99834e+06	4.05443e+06	1.14524e+07	9.76091e+06	4.67667e+06	9.21184e+06	1.08281e+07	5.77777e+06	1.06832e+07	5.28573e+06	8.45068e+06
LIPID-P-2513	SP	Cer-AS	636.593	635.585	[M+H]+	C40H77NO4	45746.9	27074.4	55144.2	30514.4	54791	50158.5	50325.9	57460.5	35076.2	20344	44584.5	40761.7	27841.7	48507.9	70868.6	38265.6	38010.8	62408.9	34074.1	45534.1	23569.5	40750.6	50858.8	36063.8	27698.5	53924.7	20387.8	30001.1	26075.8	55718.6	28189	12704.3	27791.1	30856.3	27389.6	32167.2	33024.3	27493.5	31470.2	40104.8	37356.4	43462.5	32723
LIPID-P-0123	SP	Cer-NS	602.587	619.59	[M-H2O+H]+	C40H77NO3	217849	621943	635470	92710.9	158545	706187	141944	83862.8	113980	336765	361453	179068	65913.3	574161	172797	568286	120317	80088.5	96676.2	150154	669847	587509	60526.5	197254	443539	383115	194413	708226	550823	144900	132389	533123	402276	113141	502797	491123	100964	234160	493063	167846	276501	137171	225911
LIPID-P-0116	SP	Cer-NS	618.618	635.622	[M-H2O+H]+	C41H81NO3	4.3425e+06	1.16952e+07	1.08564e+07	1.51938e+06	3.35566e+06	1.13243e+07	4.56795e+06	2.85186e+06	1.54257e+06	5.04242e+06	2.98496e+06	2.14386e+06	2.28482e+06	3.86176e+06	3.49823e+06	6.50663e+06	4.25343e+06	2.15192e+06	3.0054e+06	2.44339e+06	6.4766e+06	8.2009e+06	1.77776e+06	2.24728e+06	4.58315e+06	5.44683e+06	4.45728e+06	8.31682e+06	6.29466e+06	3.99812e+06	2.1207e+06	7.32386e+06	5.43211e+06	2.32836e+06	7.58714e+06	5.58396e+06	3.16923e+06	6.20034e+06	8.80365e+06	3.51129e+06	7.03441e+06	3.50278e+06	4.03233e+06
LIPID-P-2074	SP	Cer-NS	616.603	633.606	[M-H2O+H]+	C41H79NO3	173749	481014	488594	61631.5	85518.6	476451	122177	61834.9	96034.7	169033	189578	105916	50498.3	354888	135599	363288	149429	113859	75371.5	79870.9	433232	397820	62600.3	152354	257824	277429	225757	461109	351025	133718	53042.9	362847	288311	72721.7	367593	262447	126754	87011.9	345209	170647	163175	129846	164434
LIPID-P-1559	SP	Cer-AS	666.639	665.632	[M+H]+	C42H83NO4	45274.1	48475	60160.2	53883.2	44786.3	52146	57726.7	46246	53273.2	88726.4	48457.3	35511.7	23711.2	49564.5	58899.1	63412.3	48448.4	47369.8	45181.8	60082.1	41748.8	73751.8	34554.6	40965.1	60450.3	57962.3	62297.8	41212.8	54028.7	66790	53329.8	48816	27514.2	38765.8	44299.8	46304.3	46367	112192	47373.4	50361.2	42665.9	48857.9	60527.3
LIPID-P-0117	SP	Cer-NS	632.634	649.637	[M-H2O+H]+	C42H83NO3	2.8244e+07	3.94134e+07	4.95631e+07	1.547e+07	2.33989e+07	5.57683e+07	4.52267e+07	2.85634e+07	1.45763e+07	4.29048e+07	1.97591e+07	2.49704e+07	1.81776e+07	2.97139e+07	2.70105e+07	4.77076e+07	3.22829e+07	2.61466e+07	2.47915e+07	2.56314e+07	3.37169e+07	4.27969e+07	1.87777e+07	1.51082e+07	3.35033e+07	3.75965e+07	2.13563e+07	3.08333e+07	3.23882e+07	2.88895e+07	1.41226e+07	3.5802e+07	2.80695e+07	1.47586e+07	3.46198e+07	3.30812e+07	1.86101e+07	2.94145e+07	3.96822e+07	2.16192e+07	2.84621e+07	1.82576e+07	3.41235e+07
LIPID-P-2075	SP	Cer-NS	628.603	645.606	[M-H2O+H]+	C42H79NO3	817466	1.81322e+06	1.55089e+06	503361	814343	1.55476e+06	582113	637711	858318	754088	837946	650175	272145	1.1216e+06	663025	2.13342e+06	669308	382851	436331	788047	1.16899e+06	1.11602e+06	227090	602335	1.34982e+06	1.00212e+06	465299	1.24398e+06	944601	694561	408731	1.19484e+06	761597	345222	943014	1.06068e+06	430762	558952	1.24767e+06	647584	1.02349e+06	476360	913596
LIPID-P-0118	SP	Cer-NS	646.65	663.653	[M-H2O+H]+	C43H85NO3	1.12596e+06	2.64545e+06	2.58109e+06	378202	849919	1.88222e+06	1.13406e+06	814873	325196	957125	539477	445252	783961	1.06236e+06	724490	1.71325e+06	1.28081e+06	735456	623642	473210	1.53474e+06	3.27358e+06	348854	629129	891064	1.19116e+06	1.02677e+06	1.73267e+06	1.71107e+06	1.19982e+06	599416	1.77985e+06	1.3289e+06	549320	1.94063e+06	1.12685e+06	1.33137e+06	1.08692e+06	1.59303e+06	797602	1.30948e+06	756691	1.40314e+06
LIPID-P-2076	SP	Cer-NS	644.634	661.637	[M-H2O+H]+	C43H83NO3	440124	1.00533e+06	844857	215351	193791	970270	380489	161833	249334	491180	296956	222653	185441	430352	234568	923762	415403	153193	198123	222240	529540	692340	102914	192901	623540	415583	423270	560651	593198	305911	172122	607303	387567	162180	528538	536996	212440	552181	634564	270851	466891	169451	505066
LIPID-P-0119	SP	Cer-NS	660.665	677.669	[M-H2O+H]+	C44H87NO3	507721	835422	874750	282541	368016	975787	509732	415151	477067	637230	322650	534319	256610	573176	280492	928816	427080	323498	259557	365486	844998	944771	261971	273128	506121	675950	442728	697525	548377	486507	395276	701782	608804	309574	676430	540960	433292	365787	644495	360408	673288	376707	559460
LIPID-P-0125	SP	Cer-NS	658.65	675.653	[M-H2O+H]+	C44H85NO3	411445	827485	876908	339861	318031	749435	507835	369581	502633	727794	364535	404952	269667	552949	381801	785625	477394	259495	304281	321410	586802	701583	202139	320115	633155	458747	336718	547355	469058	463463	317429	513659	402859	239329	599859	570668	263988	588232	551785	434917	425118	334918	565938
LIPID-P-2519	SP	Cer-AS	672.629	689.632	[M-H2O+H]+	C44H83NO4	108896	190731	109999	56340.5	128021	84818.7	98820.8	243370	506086	74662.9	64455.5	196409	33824.5	98760	181890	118176	65728.7	133692	65432.6	130463	57183.2	123061	59945	71210.1	72721.2	85955.7	57379.1	105544	71278.1	107459	76939.5	63368.3	102334	59980.8	88204.3	63667.8	71078.8	100281	56278.9	84754.4	156541	67043.1	84839
LIPID-P-2077	SP	Cer-NS	656.634	673.637	[M-H2O+H]+	C44H83NO3	183392	428618	318447	155172	184863	284771	166775	194904	218980	236014	198549	183632	80192.4	323840	142758	595185	245870	102112	110255	238264	399595	339617	66816.8	145558	285531	252385	124717	277670	226624	186567	117259	301675	204455	102100	288292	277565	119877	126351	314613	200144	195863	147882	339006
LIPID-P-2523	SP	Cer-AS	872.879	889.883	[M-H2O+H]+	C58H115NO4	36471.6	36116.2	55984.3	37219	51542	55353.6	56943.4	56763.3	14990.7	49339	18737	25509.5	9654.65	19474.8	39004.3	44655.7	32505.5	42837.6	30097.9	44976.8	26462.6	37628.3	40423.8	12278.9	9580.9	33958.1	23469.8	36277.8	30224.3	30790	21560.5	42494	23442.6	17829.4	30469.8	22328.9	27368.6	21407.7	25184.6	22269.1	37758.7	16144.6	53962.2
LIPID-P-2525	SP	Cer-AS	868.848	885.851	[M-H2O+H]+	C58H111NO4	183012	493211	425826	144350	364744	535024	391730	264057	152872	451684	130690	240681	164204	191071	239042	363565	237956	257243	333907	336390	337046	329110	252141	108202	253694	216800	211794	286955	279335	322714	142187	365579	197951	215452	247321	230534	204324	242195	267501	204705	412061	149427	631237
LIPID-P-0134	SP	Cer-NS	518.493	535.496	[M-H2O+H]+	C34H65NO3	129292	164641	112154	79310.2	199399	139430	157189	138988	244372	231560	144692	89169.7	74035.9	129302	132044	205730	86173.1	129480	171157	203109	117957	133069	83593.9	123403	159933	87151	82311.6	107914	138113	116340	112434	136829	126866	101415	124330	220212	83490.8	120448	117476	86168	129010	112320	101253
LIPID-P-0136	SP	Cer-NS	546.524	563.528	[M-H2O+H]+	C36H69NO3	164543	191699	108787	121667	210949	106837	187368	172878	244716	194552	189054	125226	102456	129575	155095	238570	101019	160970	169284	267761	128321	131965	104685	150399	217422	94266.7	112802	130856	120889	148716	97779.6	116821	104345	81873.9	137661	206618	104227	223137	158779	115801	143188	107356	110091
LIPID-P-0137	SP	Cer-NS	574.556	591.559	[M-H2O+H]+	C38H73NO3	178057	167512	182856	108761	158338	155355	200241	162466	214966	192924	143714	135702	97432.1	178241	163231	273530	139176	142666	157437	289473	118143	152143	97461.4	157433	278306	144129	125816	171526	167992	126942	94180.2	142583	107411	64078.3	155751	218524	86425	240806	228951	117217	144298	105846	148021
LIPID-P-0138	SP	Cer-NS	588.571	605.575	[M-H2O+H]+	C39H75NO3	15569.9	27386	21456.9	8138.91	11932.1	12500.5	17217.8	14290.9	15928.6	24312.4	10397.1	10204.9	3141.84	13990.2	13788.2	27573.6	12366.1	7996.59	13770.7	22100.1	14149.8	17337.3	8395.73	12648.2	28539	13649.1	15774.1	25664.1	23017.9	7904.49	9881.27	18518.1	12885.7	8537.81	21078.7	15926.3	16588	26947	30957.8	13335.5	19933.5	12289.9	20956.7
LIPID-P-2530	SP	Cer-AS	602.551	619.554	[M-H2O+H]+	C39H73NO4	113951	80777.4	131498	68343.9	118364	106823	137597	85611.5	99977.4	126368	109825	36774.1	77338.8	132428	184166	178126	129077	116437	101394	72205.6	102838	102318	59427.7	100391	105320	69245.5	91493.5	132246	150933	112696	136256	114172	80760.7	129036	102527	115655	84550.2	96719.3	100795	113359	88065.5	101319	106515
LIPID-P-0139	SP	Cer-NS	602.587	619.59	[M-H2O+H]+	C40H77NO3	851684	680394	686989	530159	615633	862762	973918	703597	1.00942e+06	1.03412e+06	592806	619500	409390	823051	689199	1.2293e+06	630482	895734	752104	1.09472e+06	482238	716878	453156	620582	1.11312e+06	746582	525956	564561	611882	623588	313575	624807	577522	333665	738258	960005	498828	967130	829234	528675	590596	423488	666848
LIPID-P-0140	SP	Cer-NS	616.603	633.606	[M-H2O+H]+	C41H79NO3	488811	627371	390433	273793	374755	515394	745747	398275	498511	920355	321576	346171	269091	390408	454506	990898	477811	393367	612524	614166	290129	658895	257295	347532	620891	472026	539262	416122	526609	451662	180288	541619	401977	287317	526407	653847	496179	819060	774853	432434	450173	343954	423800
LIPID-P-0141	SP	Cer-NS	630.618	647.622	[M-H2O+H]+	C42H81NO3	3.91423e+06	2.9722e+06	3.22793e+06	1.69694e+06	2.34123e+06	5.34284e+06	6.0322e+06	2.98231e+06	3.06216e+06	5.89886e+06	2.44444e+06	3.27482e+06	1.82849e+06	3.78575e+06	3.10052e+06	6.57344e+06	3.17953e+06	3.88855e+06	3.80082e+06	3.98262e+06	2.2962e+06	4.04913e+06	2.55535e+06	3.03096e+06	4.41913e+06	3.72114e+06	2.66649e+06	2.36761e+06	3.34904e+06	3.67774e+06	1.376e+06	3.00932e+06	2.97979e+06	1.66383e+06	3.56892e+06	4.22829e+06	2.36949e+06	3.21075e+06	4.07852e+06	2.50169e+06	2.74067e+06	2.03805e+06	3.31177e+06
LIPID-P-0142	SP	Cer-NS	628.603	645.606	[M-H2O+H]+	C42H79NO3	831669	1.01094e+06	946402	656736	787238	1.1203e+06	1.18645e+06	751660	1.43084e+06	1.30037e+06	793982	869346	512810	1.08906e+06	970621	1.79481e+06	845179	846535	989789	989726	636089	761855	515150	762189	1.51698e+06	907977	616414	724568	785311	950330	426546	686671	597876	490517	943046	1.40585e+06	684002	1.46069e+06	1.05964e+06	785120	874437	552890	1.01683e+06
LIPID-P-2084	SP	Cer-NS	626.587	643.59	[M-H2O+H]+	C42H77NO3	93315.8	100399	88305.5	75049.9	77671.2	95678.8	58310.1	80212.5	149465	86033.1	83359.4	80049.8	23794.7	144971	69845.9	252365	69461.3	86530.6	52415.9	125511	95770.7	100939	32728.9	108483	186926	100713	46513	93541.4	101412	89994.3	47063.3	113981	81317.6	36103.7	77141.6	146880	75673.2	63455.1	129663	81786.7	74526.4	61605.3	81741
LIPID-P-2085	SP	Cer-NS	644.634	661.637	[M-H2O+H]+	C43H83NO3	148734	190335	139113	39036.4	60040.1	144021	194881	84800.6	48652.2	179344	67081.3	113608	84599.2	100816	118470	249179	127116	122818	85567.5	127002	105543	311955	66633.3	124881	112239	129074	129950	124509	149646	134878	76690.6	148308	137333	73454.2	165903	138025	205406	134610	179816	92251.3	91799.4	71104.7	167865
LIPID-P-2086	SP	Cer-NS	642.618	659.622	[M-H2O+H]+	C43H81NO3	37909.3	62978.6	28734.6	22484.7	16289.7	44585.1	37721.9	20270.5	38451.5	66497.2	30792.9	25412.4	23248.1	34865.6	25577.1	101563	47346.9	24825.2	30797.5	37574	23875.5	40555.1	18387.4	35673.5	75947.3	27819	40084.9	31312.6	44238.2	22708.6	16499.6	47769	24824.9	17080.8	41288.1	48216.1	21298	54531.4	59997.9	37725.3	25482.5	21359.3	40169.7
LIPID-P-0143	SP	Cer-NS	658.65	675.653	[M-H2O+H]+	C44H85NO3	56978	98780.4	80049.1	36634.6	40823.6	121238	76387.9	52464.3	56984.3	70681.9	35795.3	58482	34355.6	89106.5	64652.7	105206	35716.3	69816.7	20877.7	59694.4	65282.5	103765	34995	34355.6	60738.3	52554.6	37239.8	62519	43846	68458.5	35346.6	76843.3	48564	36179.2	65692.9	83210.3	56030.6	43066.7	76574.3	35334.6	70555.3	47151.9	51550.6
LIPID-P-2087	SP	Cer-NS	656.634	673.637	[M-H2O+H]+	C44H83NO3	76207.8	96853.2	90947	58756	43982.3	86533.9	68505	34046.3	93035.1	93803.8	42224.5	63040.5	58617.1	68268.6	59328.1	126885	74377.6	37405.5	51190	64673.5	56353.4	78083.2	43325	52144.9	100614	47461.6	55781.7	63185.9	54877.4	74475.6	30808.8	48107	43064.7	28263	63547.4	61045.5	42117.6	59855.1	65207.7	56597.3	53528.5	48082.2	81253.5
LIPID-P-2534	SP	Cer-AS	868.848	885.851	[M-H2O+H]+	C58H111NO4	59942	58040	51232.9	42422.2	61570.9	85960.6	110175	94499.2	45774.5	85345.7	26828.9	60364.4	23144.4	23938.2	78948	104724	69272.7	84570.3	74364.8	93255.5	36648.1	72945	78334.7	31933.3	37106.1	27628.4	52973.9	39553.1	59910.5	77574.2	27202.8	45394.8	35646.8	33527.9	41231.1	43656.1	62228.9	30128.3	48655	26695.5	62249	20208.9	75098.9
LIPID-P-2536	SP	Cer-AS	894.864	911.867	[M-H2O+H]+	C60H113NO4	50455.2	48272.5	40492.1	30036.5	56801.5	54898.5	81816.5	66932.6	28479	79160.7	27872	58320.9	36284.3	50053.1	61394	87868.8	42978.4	80803.3	83037.8	74655.2	25154.1	82919.9	62265.3	22524.8	48785.9	47826.6	46709.4	42143.3	54125	95222.2	24328.2	49167.2	46599.5	37098.6	46640.7	37948.9	49044.5	44812.8	55253.6	44207.3	46567.8	34228.5	87216.7
LIPID-P-2092	SP	Cer-NS	618.618	635.622	[M-H2O+H]+	C41H81NO3	223755	225498	190131	96990.9	207787	157076	135324	212064	175564	181931	130055	99058	130193	156225	275223	238931	289654	239146	74639.3	159899	216404	354144	116215	114586	167068	174277	295942	282435	170302	164507	283788	258402	202217	68540.6	245037	180264	146658	183204	227782	104703	304377	141125	455931
LIPID-P-2094	SP	Cer-NS	632.634	649.637	[M-H2O+H]+	C42H83NO3	119073	129483	106912	59728.1	122222	83432.4	72311.4	117266	75903.5	99343.1	46050.7	37155.6	90707.9	62012.3	108239	143708	139759	120258	56580.9	62422.9	97899.1	233500	58191.6	52576.2	100733	115327	275446	175085	111436	87627.4	115813	237676	117007	41749.3	194055	91174.1	140325	131131	149119	77338.8	220912	88194.9	274247
LIPID-P-2096	SP	Cer-NS	644.634	661.637	[M-H2O+H]+	C43H83NO3	305597	356851	283944	229415	280618	184662	201333	373872	366648	304377	212246	159903	209196	295172	335096	373955	381555	312527	86042.2	206135	321068	511426	148833	249472	470762	232954	474773	370841	211007	251600	410608	384615	211657	155131	349234	289613	220453	345469	386641	240925	387252	179757	969347
LIPID-P-2551	SP	Cer-AS	880.848	897.851	[M-H2O+H]+	C59H111NO4	1930.52	25899.8	24287.3	1084.06	4231.78	45961.4	8839.91	107.99	107.99	20345.4	50691	80755.8	15238.7	117996	2018.6	136451	2728.85	5360.95	3376.96	1497.65	100667	193958	1465.93	28448.7	37523.1	64393.5	17942.9	64158.2	55585.8	14711.5	3675.7	151078	68697	15300.7	42287.5	53825.1	12752	5585.53	86646.1	10593.6	53527.5	2684.53	65090.1
LIPID-P-2104	SP	Cer-NS	658.65	675.653	[M-H2O+H]+	C44H85NO3	307814	327904	399161	313648	331215	497073	516342	343804	234981	547141	392036	389365	330311	365585	368139	477136	370368	191569	367260	318657	441303	593523	178211	191456	367763	317520	192743	410197	233188	328256	198944	281305	297046	163883	403611	399657	209766	532986	360121	246251	411565	190062	464885
LIPID-P-2108	SP	Cer-NS	688.697	705.7	[M-H2O+H]+	C46H91NO3	38550.1	44879.6	45872	95454.8	46943.8	60402	51596.2	45167.8	44889.8	28844.2	46868.7	44265.4	17954.7	46737	59974.7	72360.2	37493.7	34366.3	54238	62058	71837.1	83334.2	42486.7	43815.4	36168.2	69740.4	64152.7	53144.8	49030.4	55504.9	46763.7	53886.7	35921.3	16247.7	86673.3	44857.2	41286.2	40899.2	61113.9	33407.3	34815.7	67653.4	50205.9
LIPID-P-2562	SP	Cer-AS	882.864	899.867	[M-H2O+H]+	C59H113NO4	3472.46	36449.2	28113.1	1123.59	7006.56	32240.3	6023.02	8530.6	224.718	5577.17	20639.4	30698.1	28235.1	38818.5	9502.33	32299.2	22187.1	4034.19	1682.03	2649.54	90565.4	146136	13045.1	22075.5	23218.9	61231.3	21730	53505.5	53220.7	28457	2986.98	91598.1	51121.5	7555.05	47791.3	41457.4	45619.5	16377.5	57002	9009.5	41674.9	8059.22	70099
LIPID-P-2563	SP	Cer-AS	856.848	873.851	[M-H2O+H]+	C57H111NO4	40429.3	75004.1	63005.4	3023.53	14335.3	78638.3	26569.6	29169.4	4000.27	15956.2	70939.4	46290.4	12506.9	108320	13975.9	116835	28150.4	21022.4	15052.5	8874.28	130924	171745	14543.9	52708.1	48625.2	93358.9	34285.3	74984.1	108498	35987.6	14102	118759	91662.4	31322.3	100117	54248.7	44366.2	28686.9	106977	34793.3	80901.1	49915.3	114365
LIPID-P-2565	SP	Cer-AS	880.848	897.851	[M-H2O+H]+	C59H111NO4	135640	291291	273383	113048	199875	214176	200433	150537	39051.5	115500	215551	158597	128494	230549	189083	261898	184998	187748	135424	79131.9	285386	230755	203647	214410	174460	177378	182382	284097	268867	246167	133320	246123	277062	172692	259945	217367	277714	138676	247483	186087	321969	155698	287180
LIPID-P-2116	SP	Cer-NS	558.524	575.528	[M-H2O+H]+	C37H69NO3	143861	127536	128350	113617	112667	117895	122988	148400	116156	105130	112675	121280	134291	101321	113794	86212	105912	119844	144334	138368	67566.6	87114.2	109015	105899	75502.2	84792.9	97247.8	99357.2	93729.9	104104	123522	100185	104804	115804	89485.6	91198.1	116188	82818.1	108062	94487.2	80176.2	111653	97998
LIPID-P-2567	SP	Cer-AS	878.832	895.836	[M-H2O+H]+	C59H109NO4	48803.6	120840	122465	17010.4	38225.8	62587.5	64216.8	46057.4	8874.19	24373	54040.6	68127.8	22286.7	90078.5	38195.9	102056	43879.3	46577.9	32222.5	18448.2	127258	104042	35207.4	66108.2	54747.6	94234.2	91024.8	128965	119573	77105.2	56240.8	94836.6	60606.1	67731.6	88257	81327.7	95055.4	38021.9	109417	37129.3	112176	56234.3	148546
LIPID-P-2568	SP	Cer-AS	688.66	705.664	[M-H2O+H]+	C45H87NO4	2.32898e+06	1.46779e+06	3.1476e+06	767219	1.43965e+06	2.56814e+06	2.22999e+06	1.07619e+06	1.30224e+06	856826	487312	225194	262248	2.0036e+06	1.23035e+06	1.05001e+06	1.24356e+06	928549	572320	1.03296e+06	1.15898e+06	787814	569864	1.07164e+06	849473	794236	905614	961126	819654	501344	401285	747531	1.24933e+06	698699	1.25853e+06	450929	282663	170598	488671	314080	511976	518205	1.11819e+06
LIPID-P-2571	SP	Cer-AS	854.832	871.836	[M-H2O+H]+	C57H109NO4	8527.21	79261.3	53820.8	1482.16	6534.9	64673.6	7825.94	4110.38	2412.32	12274.9	50510.5	97376.2	9160.67	136661	13843.7	152552	23355.6	12781	12101.2	2413.15	187949	219318	8039.82	48503.2	41290.6	63527	22043.7	54486.2	88343.8	42936.2	14283.9	149853	92489.3	5949.07	101501	51113.8	29619.2	6708.96	78410.2	15549.3	99756.9	22490.4	120472
LIPID-P-2573	SP	Cer-AS	856.848	873.851	[M-H2O+H]+	C57H111NO4	20985	105735	58323.6	1493.98	25003.4	56293.1	11540.6	10240.8	200.196	20061.8	48889.7	81508.3	13267.3	51666.5	20962.3	105880	33267.5	19086.7	8205.84	12830.9	148240	169659	10068.2	32295.9	44967.1	93357.3	41659	60705.9	64062.3	47156.7	26119.4	101563	84884.1	12870.2	74558.8	57318.4	31842	11327.2	92643.4	10692.7	60547.1	21394.5	89034.8
LIPID-P-2575	SP	Cer-AS	882.864	899.867	[M-H2O+H]+	C59H113NO4	18154.6	81621.2	68555.5	1503.5	25080.4	38893.1	13310.2	27556.9	212.859	10968.5	64327.7	55357.8	29172.5	86983.1	22126.9	129168	23545.9	17904.2	9494.36	7172.25	163651	242405	9262.75	31717.6	37657.1	113211	21680.6	77279	82901.2	44765.5	30816.7	183744	79535.5	16983.8	72522.9	41234.8	55048.3	32930.7	86770.1	22007.8	81809.9	27147.7	97218.2
LIPID-P-2576	SP	Cer-AS	880.848	897.851	[M-H2O+H]+	C59H111NO4	2712.08	40490.7	17647.2	215.017	2521.54	68936	1075.08	6727	215.017	19352.9	37309.7	96093.3	19479.9	112400	9873.45	138005	7770.31	2996.65	2892.33	1120.96	114561	276378	2112.22	42341.6	44466	67458.8	25643	60250.3	50865.4	4854.29	1947.89	146631	100338	2683.69	65895.9	75097.4	13377.2	10759.5	82755	6315.6	48598.8	5246.45	47155.2
LIPID-P-2029	SP	Cer-NDS	634.65	651.653	[M-H2O+H]+	C42H85NO3	381856	283795	404791	339006	206427	454428	543769	337333	182313	285622	121165	306238	208053	302213	251320	302723	241840	230513	200345	338839	344718	457379	181235	180244	336719	388250	323160	288482	250008	398029	119812	234169	338848	203164	411433	302003	209929	263669	253338	251370	269287	181239	324516
LIPID-P-2583	SP	Cer-AS	856.848	873.851	[M-H2O+H]+	C57H111NO4	13267.6	96512.8	65492.3	6508.45	15109.2	70829.1	13027.1	22071.9	1063.96	31263.5	59282.8	63116.2	16381	86444.5	11777	151269	40549.6	19317	12360.5	6659.73	135853	145637	34946.6	48962.5	59604.4	104907	41069.7	80937.1	97918.7	52148.5	21738.7	126058	76246.8	14413.2	84983.7	58854.7	66813.1	12870.2	124892	16873.7	83512.1	11557.6	86983.1
LIPID-P-2585	SP	Cer-AS	882.864	899.867	[M-H2O+H]+	C59H113NO4	13824.3	85999.4	53723.1	3261.18	18446.6	54682.9	14472.5	18061.5	298.997	45898.9	56333.2	70937.8	30704.1	85451.7	26563.7	124216	47087.2	24100.7	20474	2581.31	203294	262739	24516.7	52708.1	40754.2	108063	31727.3	89252.2	107985	57411	38790	211380	106761	29772.4	84865.3	67695.9	87457.1	21019.7	102722	30702.3	122465	28303.2	120251
LIPID-P-2586	SP	Cer-AS	600.535	617.538	[M-H2O+H]+	C39H71NO4	240579	174624	205705	191833	186387	179043	212996	209311	247953	199055	188776	204556	239951	168977	152654	172586	194607	172035	206281	170222	147338	185058	170053	184544	151815	185351	214522	211838	165484	143106	213654	218819	223866	187233	193542	192996	194111	155153	208124	153087	120385	153702	174896
LIPID-P-2593	SP	Cer-AS	856.848	873.851	[M-H2O+H]+	C57H111NO4	10943.8	108401	59799.1	5991.32	21838.5	76036.3	25228.9	29506.5	5109.08	19557.5	63635.5	63119.3	24055.9	102337	10943.8	122982	26104.4	15130.2	12736.2	11793.8	157529	173408	10573.8	59896.5	34563.1	79244.7	27600.9	81427.1	84945.3	42542	10574	145354	106778	17231.2	88642.7	68751.4	66810	22643.5	108000	28073.5	106506	30260.6	132566
LIPID-P-2594	SP	Cer-AS	882.864	899.867	[M-H2O+H]+	C59H113NO4	25737.5	123720	74700.6	2723.22	22919.9	48102.6	13311.7	36333.2	299.13	26758.7	72561.4	52998.5	31729.2	91080.2	30033.7	115262	33852.7	18016.1	25481.1	9567.56	177561	266107	12585.6	46567.9	59624.5	134316	29012.5	76140.4	88023.9	30873.9	25672.1	191421	99788.6	27272.5	100301	54590.3	76655.7	35013.6	125324	21374.7	89014.1	22646	129463
LIPID-P-2601	SP	Cer-AS	856.848	873.851	[M-H2O+H]+	C57H111NO4	29170.4	98563.4	44260.8	4530.79	26565.2	61970.4	27125.2	11795.3	1514.03	15947.9	55289.8	73026.2	17947.2	115648	11465.4	117877	32947.5	31318.5	3261.18	7832.82	153351	181131	22433.3	30194.6	44443.4	76672.2	19272.5	100780	97230.3	37550.1	13579.1	77780	82285.2	7725.8	76125.5	46355.5	48569.2	11327.2	70636.1	21493.7	98130.7	25567.1	82379.6
LIPID-P-2602	SP	Cer-AS	882.864	899.867	[M-H2O+H]+	C59H113NO4	12002.7	74949	58838.6	2528.78	37359.9	50660.9	35309.6	33265.4	1506	13384	27119.3	54544.8	34284.6	90055.2	15894.7	120558	30729.1	20510.5	16124.7	2978.46	200720	214077	14313.7	51686	58294.1	98285.8	29100	75623.5	104394	46305.4	19045.8	165307	133062	28147.3	84357.8	45297	59675.3	22447.3	101907	27123.8	85920.4	30262.1	115129
LIPID-P-2604	SP	Cer-AS	880.848	897.851	[M-H2O+H]+	C59H111NO4	5785.78	25117.7	21704.4	194.635	194.635	194.635	194.635	194.635	194.635	194.635	194.635	63887	194.635	58968.1	7491.23	104248	194.635	194.635	194.635	194.635	91237.5	187664	194.635	34855.3	31180.9	49542.3	194.635	48939.5	194.635	194.635	194.635	124110	68695.5	194.635	194.635	45361.6	7127.95	194.635	194.635	6106.47	194.635	194.635	29737
LIPID-P-2607	SP	Cer-AS	856.848	873.851	[M-H2O+H]+	C57H111NO4	15340.7	43635.6	42434.2	2500.37	8196.65	31730.8	9396.51	12273.2	1102.29	7037.64	42252.6	29213.9	12802.2	26082.2	4545.54	77174.7	23171.8	10811.8	3006.67	2978.46	90752.9	109076	14927.1	33101.3	22488.3	54193.7	22914.3	38970.5	39064.1	15894.6	5529.47	64476	58335.7	8963.26	48489.3	13824.2	22969.7	9430.44	41445.3	9034.53	51966.7	12527	55260.4
LIPID-P-2612	SP	Cer-AS	882.864	899.867	[M-H2O+H]+	C59H113NO4	26103.1	74949	48093.7	2503.33	22918.3	52197.1	20474	15086.5	199.496	13899.3	49030.9	74612.1	52924.4	67027	14045	126062	21121	11056.9	11067.2	997.479	168815	219743	13900.8	35311.1	44364.9	114832	20364.3	66878.7	80852.4	66373.7	14928.6	185266	105418	33961.4	85382	63110.8	56589.6	29434.7	90296.5	9730.26	105995	23673.7	144298
LIPID-P-2619	SP	Cer-AS	856.848	873.851	[M-H2O+H]+	C57H111NO4	6778.36	72091.3	31720.8	1496.76	16893.6	35351.9	14846.4	16569.6	299.352	18011.4	50635.4	48024.2	9511.23	84728.6	11264.5	124211	36337.2	19303.4	9088.05	5295.9	132246	128995	15090.9	29688.9	39205.6	70411	36841.8	76140.4	72258.1	45794.7	19841.1	95658.1	79825.7	16708.4	76171.9	44788.7	49904.5	11385.3	69070	15868.3	86164.5	19961.7	95650.9
LIPID-P-2621	SP	Cer-AS	882.864	899.867	[M-H2O+H]+	C59H113NO4	14048.2	60060.5	60883.9	1490.96	15358.9	42185.1	16381	24055.9	295.559	5484.81	39628.2	40139.3	33263.9	70611.6	29682	99818.2	25714.6	17316.8	8487.6	1477.79	175495	210987	9785.22	29683.5	26312.9	103431	22004.7	59679.9	112585	29844.7	14928.6	181178	111050	9776.32	73037.4	51290.1	48182	30875.4	81214.9	22007.8	77690.1	31276.3	127924
LIPID-P-2622	SP	Cer-AS	880.848	897.851	[M-H2O+H]+	C59H111NO4	4843.44	35431.1	42032.3	1038.16	2894.33	52609	1498.96	1930.52	204.015	26326.6	36139.1	62228.7	18649.3	70695.5	9616.78	130475	14340	7444.94	204.015	1465.93	127242	183084	1925.07	42335.6	52134.7	86365.8	30246.9	61649.4	63715	10171.9	10397.6	132067	62575.6	5617.55	35596.5	44608.8	20764.1	4139.37	99610.2	12572.6	64290.3	11018.7	56375.6
LIPID-P-2624	SP	Cer-AS	856.848	873.851	[M-H2O+H]+	C57H111NO4	35312.7	83854.4	71857	1496.62	23543.3	81366.5	16379.5	11475.8	2016.69	13897.8	54289.1	58942.5	15084.7	131238	14090.5	203051	35315	26757.2	13046.9	2013.02	187271	254752	25216.9	61917.7	61696.1	153464	55263.5	102305	88375	62578.8	14928.6	135611	82135.9	17764.8	112632	82910.2	92396.9	20346.1	121314	26526	87981.9	27652.5	126034
LIPID-P-2627	SP	Cer-AS	882.864	899.867	[M-H2O+H]+	C59H113NO4	7487.65	91889.7	93626.6	8031.19	28659.9	76246.8	37872.5	32752.9	1496.7	11557.6	67931.4	102310	41449.8	106431	21178.6	130695	23545.9	29846.2	14590.6	2976.97	215654	288779	18530.3	75224.8	52435.7	141007	38377.8	95689.6	83413.7	41678	26760.1	206790	128458	45276.2	88983.7	67186.1	101869	29332.4	101399	29515.9	55052.7	24098.8	122301
LIPID-P-2631	SP	Cer-AS	880.848	897.851	[M-H2O+H]+	C59H111NO4	7255.8	30240.5	24956.8	305.414	305.414	305.414	305.414	305.414	305.414	305.414	305.414	81779.7	305.414	101305	6718.01	113409	305.414	305.414	305.414	305.414	105776	240578	305.414	41422.6	39360.1	67927.9	305.414	73413.7	305.414	305.414	305.414	168384	61004.7	305.414	305.414	49394.3	19749.9	305.414	305.414	3102.65	305.414	305.414	52786.7
LIPID-P-2632	SP	Cer-AS	856.848	873.851	[M-H2O+H]+	C57H111NO4	10547.5	98962.1	63891.7	3006.67	16868	52601	28659.9	29633.5	200.299	16470	43818.5	59489.8	24484.4	67537.9	10091.1	119964	30708.9	25056.4	4257.16	5002.33	142494	204641	20345.1	64985.5	35554.4	76153.7	41918.4	60572.9	95131.7	39142.7	13057.8	126917	81241.9	13091.9	84041.4	47312.2	60544	8239.62	99300.7	23916	87164	17373.8	105409
LIPID-P-2636	SP	Cer-AS	882.864	899.867	[M-H2O+H]+	C59H113NO4	16820	75460.1	41443.9	2002.66	17915.7	46366.1	10943.4	20986.6	202.608	10068.2	33450.2	65863.9	49281.4	65536.5	20171.6	103418	18941.4	12003.4	12224.4	2997.37	136371	182671	21085.6	31218.2	26276	82841.8	31214.8	63793.1	51561.6	33258.2	11078.2	179132	82397.8	27271	70978.1	57832.5	46303.5	29329.3	85755	22518.8	79751.5	21616.7	93639.8
LIPID-P-1940	SP	Cer-AP	538.483	555.486	[M-H2O+H]+	C33H65NO5	12248.5	11435.9	7305.7	15415.4	29792.2	13427.8	8576.39	8929.84	12066	9674.04	7312.87	7743.72	10051.6	11844.8	4867.29	5784.25	6970.76	11026	2833.22	9833.05	11001.7	8535.54	10969.9	5296.54	11069.9	11258.5	27256.5	48614.9	3675.14	8995	9420.1	7322.52	6447.1	3693.17	4023.31	5639.8	11404.1	10549.8	7708.59	11472	12284.8	14329.4	6490.89
LIPID-P-2399	SP	Cer-NP	614.551	631.554	[M-H2O+H]+	C40H73NO4	11859.8	37036.5	6251.17	29443.6	67774	6981.61	6543.54	13500.8	8023.01	17608.1	10252.2	18338.4	7698.5	11507.2	5445.44	10485	15945.8	38133.9	12613.4	11638.9	15770.1	15284.4	6663.31	6306.52	5771.71	26767.3	58905.2	76783.9	6248.24	6975.5	9279.43	8385.31	9274.29	9251.28	10179	9549.61	9061.32	10732.9	4352.12	9551.45	28893.9	22736.9	2891.1
LIPID-P-1943	SP	Cer-AP	538.483	555.486	[M-H2O+H]+	C33H65NO5	30019.6	21696.3	7330.92	21496	31219.6	14695.5	26541.9	22313.7	14178.6	20770.2	13790.7	12682.5	13375.7	11252.3	19347.3	7582.22	11688.6	12368.2	15864.9	19872.7	23931.5	16635.8	10185.3	14293.5	5220.3	29193.7	32544.6	78850.2	11773.3	6088.08	8444.49	14185	13516.4	13935.1	18796.1	13379.3	20874.3	17288.1	15513.5	9413.94	17194.3	22921.3	5688.06
LIPID-P-2405	SP	Cer-NP	632.598	649.601	[M-H2O+H]+	C41H79NO4	167803	96464.1	254693	69325.3	195479	206916	179981	238650	132352	113143	187643	118686	110829	278685	319395	175813	172932	236002	137730	163778	103750	151851	172928	107048	138416	195026	77680.2	137991	117427	183015	137136	48326.6	133691	135555	85254.5	162713	112559	117313	139721	176041	135225	164836	118404
LIPID-P-2406	SP	Cer-NP	648.629	665.632	[M-H2O+H]+	C42H83NO4	67360.4	157666	186497	45299.2	56838.4	252155	78670.8	50353.2	82261.3	130677	96430.7	59881.7	35503.5	174298	91336.7	203405	50841.3	60362.1	53330.1	126860	184311	198391	28839.9	85131.5	155687	122920	73209.7	207263	195970	55281.3	16908.6	198794	181605	52470.5	191874	121243	54136.7	127919	169620	65986.3	101639	58128	61889.7
LIPID-P-2422	SP	Cer-NP	520.472	537.476	[M-H2O+H]+	C33H63NO4	1.8408e+06	1.76139e+06	2.0613e+06	1.32781e+06	1.45636e+06	1.98664e+06	1.91974e+06	1.27955e+06	1.41679e+06	1.62515e+06	1.55839e+06	1.06257e+06	1.31148e+06	1.89002e+06	1.61359e+06	1.61859e+06	1.46419e+06	1.41563e+06	1.25076e+06	1.33845e+06	1.94484e+06	1.61813e+06	1.14797e+06	1.75577e+06	2.09957e+06	1.97953e+06	1.12154e+06	1.74812e+06	1.73477e+06	1.89086e+06	1.55775e+06	1.46025e+06	1.39071e+06	1.572e+06	1.6689e+06	1.75354e+06	1.24406e+06	1.56119e+06	1.71655e+06	1.5444e+06	1.48398e+06	1.52156e+06	1.52162e+06
LIPID-P-2423	SP	Cer-NP	518.457	535.46	[M-H2O+H]+	C33H61NO4	190609	215453	213234	103845	146858	161193	136210	83756.6	132494	154572	102399	71495.2	78373.6	135721	147719	184543	155799	62055.3	105213	91946.5	178961	145489	79309.6	119031	227883	173479	157730	229454	188695	119622	129737	231372	142624	114693	193480	186391	139413	162511	181231	92259.6	132637	121022	170915
LIPID-P-2425	SP	Cer-NP	548.504	565.507	[M-H2O+H]+	C35H67NO4	1.00761e+06	529216	921647	650277	970113	805664	1.1047e+06	899453	811423	626471	1.11144e+06	282197	573800	1.23112e+06	1.62962e+06	1.40579e+06	973187	1.06016e+06	670443	530916	1.05891e+06	680004	386662	805891	839901	779874	680837	757648	860628	1.26078e+06	896726	711346	800043	768399	931532	764376	779684	1.1213e+06	836582	1.24463e+06	546273	940132	812951
LIPID-P-2427	SP	Cer-NP	574.519	591.523	[M-H2O+H]+	C37H69NO4	40432.2	130481	89826.3	80575.6	95123	41994.8	107544	40414.6	70152.8	86005.8	59378.5	34044.5	37141.9	65368.1	65270.6	141110	74606.7	43360.2	62582.5	105671	91156.6	121164	22588.9	71412.2	111950	77577.8	60100.9	98967.9	124573	67084	43048.1	150098	84990.8	72498.3	102357	79161.1	61601.2	142661	90499.7	59390.3	64805.6	55620	47066.7
LIPID-P-2429	SP	Cer-NP	604.566	621.57	[M-H2O+H]+	C39H75NO4	1.07692e+06	645956	1.71997e+06	532081	1.23698e+06	1.11891e+06	1.40649e+06	1.50485e+06	771322	814921	1.08947e+06	684805	747018	1.78827e+06	1.78802e+06	1.20222e+06	1.69914e+06	1.47152e+06	890684	895825	689180	1.15778e+06	998944	773579	915204	2.28601e+06	468774	1.10447e+06	846906	706585	1.00533e+06	409746	952601	744670	733340	1.95941e+06	737742	942608	1.44813e+06	1.56751e+06	1.04772e+06	899371	1.17746e+06
LIPID-P-2430	SP	Cer-NP	602.551	619.554	[M-H2O+H]+	C39H73NO4	110750	106569	154720	98272.5	163068	144066	133564	115011	84874.1	109328	127602	59415.5	140429	161363	118707	105311	134497	108132	88737	76054.6	155138	102865	106940	104697	106555	166240	76550.2	147134	119790	123454	162762	91962.6	84486.8	98833.9	88068.7	141241	86314.6	177819	88523.2	149949	99109.7	138317	187802
LIPID-P-2431	SP	Cer-NP	618.582	635.585	[M-H2O+H]+	C40H77NO4	262085	119954	226754	47453.9	83368.5	320525	112223	125314	115969	167195	108721	40051.8	81640.7	194676	203976	161263	150126	135396	122735	165732	191803	276407	71663.5	175023	137242	165930	70671.1	225878	208912	118090	97927.7	63635	190149	93360.7	81328.2	129088	209340	99874.6	136950	138557	106524	114269	223030
LIPID-P-2432	SP	Cer-NP	632.598	649.601	[M-H2O+H]+	C41H79NO4	1.42679e+06	869553	2.49647e+06	828131	1.45869e+06	1.76585e+06	1.74863e+06	2.34692e+06	1.30536e+06	1.07384e+06	1.70219e+06	1.13358e+06	1.04356e+06	2.47363e+06	3.00516e+06	1.53045e+06	1.54306e+06	2.29101e+06	1.28875e+06	1.59509e+06	969092	1.44057e+06	1.65341e+06	1.07746e+06	1.21538e+06	2.01522e+06	847595	1.42447e+06	1.16524e+06	1.96106e+06	1.40344e+06	606197	1.27701e+06	1.22208e+06	1.06375e+06	1.5619e+06	1.19466e+06	1.02176e+06	1.30053e+06	1.69214e+06	1.27157e+06	1.65714e+06	1.2163e+06
LIPID-P-2433	SP	Cer-NP	630.582	647.585	[M-H2O+H]+	C41H77NO4	2.46435e+06	1.17795e+06	2.48679e+06	796978	2.80525e+06	3.35666e+06	3.32543e+06	1.87215e+06	1.58976e+06	2.06366e+06	2.08133e+06	1.67513e+06	1.88765e+06	2.70871e+06	2.20181e+06	1.92685e+06	1.74321e+06	2.01685e+06	1.64824e+06	1.4497e+06	2.45803e+06	1.90829e+06	2.06042e+06	2.70508e+06	2.23227e+06	2288740	1.75832e+06	2.34466e+06	1.89657e+06	2.57301e+06	2.31475e+06	1.4002e+06	1.4397e+06	1.59939e+06	2.10191e+06	2.54049e+06	1.80956e+06	4.3426e+06	1.88621e+06	2.23761e+06	1464360	1.93331e+06	3.35928e+06
LIPID-P-2434	SP	Cer-NP	646.613	663.617	[M-H2O+H]+	C42H81NO4	119906	282394	288722	165622	87478.3	302618	130792	44835.1	213029	416333	185435	111547	51411.7	279132	102875	391153	102844	38536.2	105268	242453	332414	435557	34054.1	137191	370210	235569	234556	312957	492384	104627	66218.1	393695	307752	130068	400612	338253	126476	505905	436953	162954	155845	94971.2	97441.2
LIPID-P-2437	SP	Cer-NP	758.738	775.742	[M-H2O+H]+	C50H97NO4	50744.3	165435	133257	22234.8	79895.2	118299	57022	73333	44511.5	59520.8	23509.5	38501.2	24809.6	71169.2	53558.8	84521.4	42647.5	41663.2	57552.4	50118.5	115710	126928	44636.4	31618.8	62014.7	40227.1	73636.1	91847.2	70455.3	75378.5	42894.8	104737	80066.6	32122.3	88895.5	59315.6	60236.9	83935.3	107030	56561.9	134941	47605.7	93785.8
LIPID-P-2438	SP	Cer-NP	786.77	803.773	[M-H2O+H]+	C52H101NO4	48502.8	139469	66529.2	28131.5	52679.6	88671	61331.7	60495.5	43304.5	38293.1	38827.1	28853.5	30249.3	55448.7	47978.8	101530	53863.3	40900.7	42766	45371.6	78642.4	94861.4	42542.2	26080.9	67707	63989.6	55293.3	99388.3	62406.2	59166.3	28298	163208	46226.8	25197	98399.7	45696.5	46270.9	46792.3	73827.3	33186.4	80780.3	38388.6	87616.8
LIPID-P-2439	SP	Cer-NP	784.754	801.757	[M-H2O+H]+	C52H99NO4	57068.2	163630	139731	59340.8	84864.2	129011	89318.7	73928.3	40702.6	79862.4	44207.5	68398.1	37209.2	56340.1	46642.8	137906	82862.3	70527.4	103537	44170.3	149992	188420	49424.5	29476.6	71904.9	101667	81050.6	132485	117106	71500.7	55305.6	152850	85925.3	75864.3	123828	76612.9	76362.7	47118.7	110866	49617.4	131971	75882.4	173738
LIPID-P-1509	SP	Cer-AP	610.577	627.58	[M-H2O+H]+	C38H77NO5	286822	336089	304630	206037	283949	267920	216342	233884	256481	238753	318862	253378	179867	322830	283971	438526	348337	225728	183876	353244	283423	285130	120912	343709	346125	318978	199345	307396	346550	277723	291068	296635	265950	230545	306901	295559	265344	204589	295480	380775	252331	303289	294120
LIPID-P-2445	SP	Cer-NP	640.624	639.617	[M+H]+	C40H81NO4	66972.1	92244.3	121232	17507.5	37361.6	109258	35219.6	45098.8	8443.92	23634.9	41686.6	29467.2	17614.7	35491.7	39785.9	43868.8	44560.3	29971.9	24353.3	14804	119215	96314.5	25962.6	29274	25992.9	94116	32201.7	110898	74701.7	46468.7	35299.6	77048.4	62214.3	45296.6	87467.6	68321.4	26225	51241	92927.6	40019.6	88078.8	71427.2	63232.3
LIPID-P-2447	SP	Cer-NP	668.655	667.648	[M+H]+	C42H85NO4	126226	110855	164101	72816.4	97352.7	164435	82603.9	109887	60579.8	71575.2	59878.4	43301	65754.5	100239	83589.3	96870.4	106027	70699	35190.5	56648.2	149226	142118	47402.2	34748.3	61855	98541.6	70168.2	121016	146944	91462.1	74841.4	162415	114951	63133.3	139288	96204	80625.7	94999.8	151515	58985	159052	106503	99749.5
LIPID-P-2451	SP	Cer-NP	520.472	537.476	[M-H2O+H]+	C33H63NO4	512260	500389	622864	345068	550134	612191	513947	398200	431272	618142	548831	361928	382543	586318	557786	728352	499128	539757	475191	421698	616034	555717	403159	460770	632352	542403	419028	587024	557261	581699	546115	594841	545003	430336	535001	590150	410031	529118	578845	505409	453982	508593	411572
LIPID-P-1952	SP	Cer-AP	800.749	817.752	[M-H2O+H]+	C52H99NO5	19527.4	72141.2	50260.5	289.369	24076	3395.66	28581.2	88656.2	1446.84	4396.39	4889.97	7829.07	7330.28	4392.56	2409.77	5410.69	23576.8	10729.6	5367.55	289.369	37847.4	35958.7	30686.6	7805.94	2989.23	83458.2	3865.83	115554	125010	117382	54359.8	275759	91878.5	34953.2	119840	52828.1	153431	61623.4	47245.3	32421.1	56358.2	70132.3	137169
LIPID-P-1953	SP	Cer-AP	830.796	847.799	[M-H2O+H]+	C54H105NO5	58428.5	209155	149078	22174.4	47699.6	89227.8	36164.6	61154.7	3400.12	25456.2	92489.5	91568	36907.3	128561	41185.6	202183	74233.2	41486.1	19645.7	22727.2	158428	188437	49300.1	68713.5	84181	99699.9	80731.5	124134	131893	76979.6	36577	145811	104182	57336.3	146190	61701.6	68327.5	28163.4	139925	43344.1	235591	44043.7	304829
LIPID-P-1954	SP	Cer-AP	828.78	845.784	[M-H2O+H]+	C54H103NO5	26206.7	158785	110397	5049.92	39813.1	35608.1	48242.1	56442.3	4137.17	21683.5	58261.3	109933	19658.8	100463	27682.8	149221	75431	76142.3	20666	2728.81	164582	131583	40052.6	38810.8	38334.6	113403	59478	153406	127529	87835.5	46024.3	250661	96294.7	50128.6	120900	70169.7	123323	24090.9	137127	41219.6	175968	58091.8	171999
LIPID-P-1956	SP	Cer-AP	856.812	873.815	[M-H2O+H]+	C56H107NO5	168177	733366	587440	49226.2	161298	408138	186769	166557	10708	117801	410312	454913	179880	620516	144300	892710	284455	168446	104591	39859.9	1.08532e+06	1.11456e+06	200989	317296	313481	593452	315706	642543	657377	347708	157165	840537	665426	198797	526905	370393	469604	128224	728184	202136	749999	165350	1.06463e+06
LIPID-P-1960	SP	Cer-AP	854.796	871.799	[M-H2O+H]+	C56H105NO5	23471.9	179559	78077.1	11161.7	28745.4	100856	21524.4	25426.5	7583.37	27195	67543.5	168310	21919.1	148583	24403	254119	41651.8	23458	14048.8	10715.1	293247	296198	16224.7	61120.7	67040.9	105012	42220.3	150787	159274	50102.4	46469.5	193686	108518	34583.1	94347.7	82681	74057.5	29321	143909	17623.8	166433	18349.7	188679
LIPID-P-1961	SP	Cer-AP	882.827	899.831	[M-H2O+H]+	C58H109NO5	15420.7	83804.8	55051.1	13140.8	16234.6	60222.8	38834.2	43503.8	5452.23	41412.1	52523.4	81739.8	36688.1	71489.6	34283.9	108415	37544.1	14333	39924.1	22958.9	131068	176822	43293.5	59846	51529.8	88129.9	50646.6	64921.1	97379.3	77376.7	58733.7	144640	89093.2	19346.4	77660.4	55673.4	94837.7	12992.1	95886.1	18372.7	77769.1	26704.5	236073
LIPID-P-1965	SP	Cer-AP	856.812	873.815	[M-H2O+H]+	C56H107NO5	33195.6	99063.4	51553.7	21083.8	24481.7	68429.7	42685.1	34777.4	3335.3	33671.3	97545.6	134599	40630.7	97900.9	13012.3	178985	63538.5	23997.4	18977.7	8508.78	172146	166523	33383.3	69790.2	74486.2	107439	38537.2	93428.5	129182	39636.5	31322.5	155228	89577.4	25059.4	93152	54167	54805.5	12748	132639	32810.6	102307	31302.5	130730
LIPID-P-1966	SP	Cer-AP	884.843	901.846	[M-H2O+H]+	C58H111NO5	40910.6	151622	91478.3	37174.1	49634.8	99796.5	81137.3	69590.7	8023.38	64541.4	97951.2	180891	49743	82181.9	44665.4	200910	104397	55669.4	56668.6	38435.3	236004	233493	82381.5	86508.6	86559.2	145480	78034.2	161888	158640	96969.5	69809.8	167393	123827	59494.5	113103	110359	98038.5	46777.5	145416	60581.1	137315	39143.5	177131
LIPID-P-1968	SP	Cer-AP	606.546	623.549	[M-H2O+H]+	C38H73NO5	17237.8	23989.5	22164.8	52294.1	46096.1	14873	34231.4	65863.9	49813	52851.9	38606	46850.6	43660.2	12982.7	19825.3	32718.4	26291.2	41603.7	36211.4	69870	13123.8	15259.6	40412.8	32003.5	33358.1	24364.9	44594.1	17235.2	17660.1	29982.7	31938.9	22681.3	21187.6	55814.9	44975.7	36211.4	27051.4	34106.7	18741.7	31258	24057.9	50600.2	16364.9
LIPID-P-1973	SP	Cer-AP	856.812	873.815	[M-H2O+H]+	C56H107NO5	54803	167651	79523.4	74812.4	89029.7	76304.4	79423.9	75692.2	16727.5	52425.2	45931.9	126399	44597.2	70195	68151.6	134435	85964.1	61140.8	54898	111406	163495	136610	94789.3	101544	78711.5	77809.7	50504.1	111665	155271	126399	50195.1	98311.3	112820	45309.4	80492.5	66521.1	89563.7	33572.6	137911	39728.1	177582	43909.9	316610
LIPID-P-1974	SP	Cer-AP	854.796	871.799	[M-H2O+H]+	C56H105NO5	27548.5	118827	45974.8	53473.9	46447.2	91279.2	58303.4	84260.5	16838.8	47353	46568.3	190530	33486.6	84913.3	38890.6	200927	103167	32907.5	63740.4	47537.3	147814	184596	87706	67614.2	83936.5	134285	50299.8	87672.8	187655	95241.8	92538.6	223153	115606	43304	80118.1	76702.1	139646	13458	125470	58378.2	148308	59563.8	161542
LIPID-P-1976	SP	Cer-AP	882.827	899.831	[M-H2O+H]+	C58H109NO5	127100	740551	260178	150907	301940	357741	275760	259660	75705.9	226012	250485	559571	226405	242891	214969	664058	467285	275916	314913	180152	870065	851601	351631	365834	259701	481037	307548	405924	612814	519821	376440	709370	426440	219571	407095	291696	639473	162962	655631	253931	782723	204792	1.4977e+06
LIPID-P-1978	SP	Cer-AP	910.859	927.862	[M-H2O+H]+	C60H113NO5	67773.3	120232	73449.1	55603	113714	72636.1	144837	118285	19096.3	66184.4	85614.4	135118	99172.1	62619.9	99339.8	183210	150117	96787.7	164768	67634.3	233663	307236	157627	121591	102392	153010	126162	83777.8	123671	129836	81571.8	206543	108675	71602.4	97613.8	93784.3	247987	104219	138122	64274.4	173429	70741.7	300547
LIPID-P-1981	SP	Cer-AP	856.812	873.815	[M-H2O+H]+	C56H107NO5	86976.9	283861	224958	22284.4	69366	139514	81699.4	59403.4	2060.82	51939.8	153696	156859	68963.5	237112	89113.7	361992	99210	48737.1	46606.5	10304.1	421939	414698	85035.5	129965	139871	209327	175581	273276	249910	112310	59367.7	390152	198963	97009.4	255888	167093	192409	59339.7	259549	73196.1	301742	75243.9	445367
LIPID-P-1985	SP	Cer-AP	910.859	927.862	[M-H2O+H]+	C60H113NO5	39289.2	119667	32570.7	29200	59602.6	67091.9	69736.2	79825.1	16395.9	77900.4	71532.5	155394	41481.4	90665.9	50460.7	194707	88071.7	52976.8	68350.7	52299.1	207158	119090	99333.9	92920.8	67903	89773	46014.7	102077	113741	98865.8	57316.6	110914	80560.5	42534.3	87030.6	63500.5	157592	19880.8	139713	55929.5	133350	39846.3	282511
LIPID-P-2465	SP	Cer-NP	650.645	667.648	[M-H2O+H]+	C42H85NO4	49284.9	79513.9	98060.2	80176.3	36157	45824.5	59724.6	39943.3	47093.7	53729.8	16092.8	27134.6	30489.1	45944.3	32789.6	78474.6	46123.1	21436.2	23385	52496	95286.9	72267.3	15644.8	18504	46180.8	66986.7	33217.8	61337	47922.7	59083.5	19086.8	31112.8	26912.1	24790.6	58702	41841.8	16979.4	83417	44499.9	40928.1	35295.1	27464.2	79541.6
LIPID-P-1988	SP	Cer-AP	856.812	873.815	[M-H2O+H]+	C56H107NO5	18756.1	72915.7	23957.5	6007.33	22918.3	40621.7	7695.19	14587.5	3966.13	30254.1	46948.8	55110.7	9036.91	55195.5	11463.9	66239.3	19944.9	13374.4	6007.33	7693.94	138749	114830	13252.3	30212.2	14939.9	56849.6	14561.3	74118.5	71353.7	37554.8	7728.18	82290.8	58326.7	18013	62568.6	34898.2	29935.4	9646.38	72683.8	21493.7	61589.6	27557.7	56766.4
LIPID-P-1991	SP	Cer-AP	630.546	647.549	[M-H2O+H]+	C40H73NO5	16096.2	12883.7	15320.4	14919.1	34832	23731.3	29350.4	26552.3	19963.4	9516.34	27809.1	17091.7	15870.8	19574.6	16441.9	9413.54	21135.8	20215.7	23487.9	14876.9	22646.3	25794.4	17241.3	25745	16051.4	27788.7	19181.4	16125.8	24663.1	18931.9	14878.5	25438	21915.1	27375.4	22249.6	6354.61	25748.9	16460.6	28997.6	22281.9	28165.7	25245.2	23440.9
LIPID-P-1993	SP	Cer-AP	606.546	623.549	[M-H2O+H]+	C38H73NO5	13793.5	7118.26	12657.7	16750.8	27059.8	9550.71	25702.1	26426.4	13771.4	26103.7	14527.3	23711	17014.1	8797.49	8394.19	14137.8	15748.4	15746.1	23666.3	33927.5	11173.8	7510.14	21464.6	11319.3	16762.8	14529.9	13016.5	7439.28	7717.51	17411.2	14131.5	17157	9297.43	25860.5	10027.5	15127.6	13529.6	9315.78	7616.97	12205	13493.2	25536.5	5941.86
LIPID-P-1994	SP	Cer-AP	856.812	873.815	[M-H2O+H]+	C56H107NO5	9380.37	44594.1	34312	5264.9	9746.21	35416.1	13010.9	4520.27	449.564	13967.3	29225.2	31300.7	6025.52	47670.1	5738.18	98059.2	13003.6	11921.4	6156.69	6700.02	77245.3	116927	16922.2	28095	23008.8	53693.7	21532.3	66285.6	50522.9	22788.6	2525.04	62500.3	69257.9	9268.8	42234.6	35419.9	24681.3	5026.24	60093	7933.45	44889.1	6268.95	72258.1
LIPID-P-0152	SP	CerP	616.471	615.463	[M+H]+	C34H66NO6P	178367	191756	184527	149682	209639	152089	264967	206423	258812	264716	182737	188077	155813	210752	261654	219396	216086	195189	213365	210313	157413	191526	165700	192752	179496	183260	207911	197251	167919	227975	246084	150483	141818	183688	155823	221709	179577	219277	133177	205572	181241	207766	144686
LIPID-N-0609	SP	CerP	642.486	643.494	[M-H]-	C36H70NO6P	77572	205529	167280	134535	111454	286303	274311	150461	174704	153269	263939	74938.2	79733.2	232581	159972	298924	232942	125845	145091	95808.8	165452	185138	111885	170945	198362	193635	146428	178543	189311	303315	136019	174735	140356	188018	248004	190222	157725	322329	198312	188892	128634	296964	136338
LIPID-N-0606	SP	CerP	728.596	729.604	[M-H]-	C42H84NO6P	11788.6	9075.34	10475.3	6946.31	8699.28	15027.4	13468.5	9763.34	8974.16	14574.5	9599.18	7011.45	8332.84	10366.7	9106.9	14248.6	9463.1	11918.8	7819.53	8843.88	10256.6	10088.9	8136.3	9307.95	8531.14	13793.3	7863.14	12621.3	8516.03	10873	8322.69	10216.7	9646.45	9567.02	10562.2	10931.8	10675.1	10966	10736.5	11256.5	8188.83	9102.35	8721.93
LIPID-N-0005	ST	BA	391.5	392.293	[M-H]-	C24H40O4	82847.8	74947	117530	37958.2	83593.8	103496	97492.8	87220.8	75291.2	77640.7	70257.8	66036.3	56760.2	89940.1	70057	152142	89751.1	76312	68056.4	63820.8	126283	90550.7	55365.1	70487.1	64458.3	85175.4	80084	115780	84926.1	79792.8	67628.7	84919.3	86962.6	57690.9	79704.4	27855.1	57843.6	67327.5	67509.5	61164.8	64972.9	57523.3	74701.4
LIPID-P-0052	ST	Cho	369.4	386.355	[M-H2O+H]+	C27H46O	6.34504e+06	6.47045e+06	6.92911e+06	4.44077e+06	5.20659e+06	6.12892e+06	5.75458e+06	4.60842e+06	4.82083e+06	6.26289e+06	5.12619e+06	4.87295e+06	4.53851e+06	6.13951e+06	5.26665e+06	6.28825e+06	5.191e+06	4.91844e+06	4.3676e+06	4.32367e+06	6.59269e+06	6.4597e+06	4.19141e+06	4.84063e+06	6.17179e+06	5.98014e+06	4.77439e+06	6.67097e+06	5.63201e+06	5.39634e+06	5.56516e+06	6.44475e+06	6.51222e+06	4.59802e+06	5.72443e+06	6.18944e+06	4.7637e+06	5.45949e+06	5.80573e+06	5.05965e+06	5.45093e+06	5.7591e+06	5.43453e+06
LIPID-P-0161	PR	CoQ	863.691	862.684	[M+H]+	C59H90O4	104878	209328	193298	333149	213579	368279	349791	298824	140379	456956	222154	246380	376819	257609	313704	363493	332260	438605	389751	328158	345712	370056	340709	252176	387308	553902	457217	316626	489984	408160	261368	469819	244148	335414	380168	328654	541425	371400	394331	395616	394338	268099	297800
LIPID-P-0160	PR	CoQ	795.629	794.621	[M+H]+	C54H82O4	23970.2	40323.9	44779.8	19916.1	29837.5	29350.7	72316.2	25410.4	1847.02	28545.6	7726.63	18139.4	74614.9	10439.1	70419.7	23582.2	87276.1	43525.6	39350	10858.8	106098	180822	22402.1	23062.8	24479.4	234344	63757.8	58734.4	91790.4	65735.3	58449.9	296392	36254	92259.8	67509.1	72784.2	91546.3	64463	91986.5	70622.2	75297.2	54247.3	154158
LIPID-P-0171	GL	DG	586.55	568.507	[M+NH4]+	C35H68O5	31679.4	36119.3	28941.8	29019.7	21636.2	33348.8	29805.2	47064.5	24450.4	27744.8	22067	25691.8	26978.5	27645.2	27921.5	32196.3	28970.6	21307.3	23899.8	21590.1	24461.7	34037.2	23615.5	27397.2	32524.8	26960.1	25488.6	24988	22524.3	25474.7	21543.2	30608.8	19528.4	25407.1	27234.2	23601.2	25238.1	28382.5	30277.9	25342.4	25784.2	32227.8	34504.2
LIPID-P-0169	GL	DG	586.55	568.507	[M+NH4]+	C35H68O5	1.53174e+06	1.51863e+06	1.58481e+06	1.4258e+06	1647386	1.66044e+06	1.57374e+06	1.74256e+06	1.4064e+06	2.18794e+06	1.44111e+06	1.39502e+06	1.59698e+06	1.4412e+06	1.56071e+06	1.53276e+06	1.36483e+06	1.24908e+06	1.35359e+06	1.50883e+06	1.44161e+06	1.48553e+06	1.47252e+06	1.45799e+06	1.32991e+06	1.3647e+06	1.32181e+06	1.63966e+06	1.27465e+06	1.547e+06	1.62863e+06	1.21157e+06	1.45798e+06	1.70691e+06	1.34904e+06	1.3265e+06	1.53227e+06	1.61085e+06	1.57722e+06	1.40957e+06	1.31551e+06	1.4099e+06	1.37608e+06
LIPID-P-0174	GL	DG	614.582	596.538	[M+NH4]+	C37H72O5	636304	930440	761600	1.00898e+06	848245	911636	867068	994422	1.02878e+06	1.18283e+06	767517	800504	943849	780335	850207	793357	717448	791682	802798	933715	738120	829067	793267	925431	1.02233e+06	841063	822257	841038	1.63997e+06	1.028e+06	998727	609483	761642	891839	708654	997173	972160	862568	717807	746901	784835	970510	836290
LIPID-P-0196	GL	DG	612.566	594.522	[M+NH4]+	C37H70O5	252018	382281	590154	143735	225016	329434	268294	308383	42581	122088	123482	157561	134205	244092	138200	294135	176026	140183	172670	232840	199344	275288	137098	170140	148903	239611	110209	272485	326668	200254	77301.3	275641	232617	124473	333600	152133	153827	119469	251453	113206	271383	106200	471608
LIPID-P-0214	GL	DG	610.55	592.507	[M+NH4]+	C37H68O5	134542	224183	177108	31286	107606	182575	79662	88144.1	11902.6	31872.4	83931.6	61059.4	48250.7	173148	53894.9	208711	79282.2	72987.9	37815.7	50496.2	198449	225998	53163.2	106190	72640.6	156812	58462.2	141964	201846	81372.5	36585.8	189214	189453	37539.4	167328	101188	73233.3	45694.5	147652	36464.4	140317	65652.6	213273
LIPID-P-0178	GL	DG	642.613	624.569	[M+NH4]+	C39H76O5	423863	298222	370482	810016	632218	391678	495624	594177	562679	631738	592126	519909	516589	411471	576632	437864	417706	443635	733410	560706	392180	416558	572683	589247	968507	340135	606994	356883	634098	457542	604983	263110	312994	533422	319288	478927	393644	535479	430126	573624	489438	498977	366910
LIPID-P-0218	GL	DG	638.582	620.538	[M+NH4]+	C39H72O5	430486	839568	1.24152e+06	181807	338684	615811	472442	493205	56407.8	219320	161537	396180	229288	516084	275017	543997	332829	302906	321105	176273	535560	803103	279599	245373	262007	599578	189897	550261	566889	560052	221947	985594	699325	293533	513775	319761	485880	413864	509569	245166	492601	263546	1.2544e+06
LIPID-P-0229	GL	DG	636.566	618.522	[M+NH4]+	C39H70O5	113696	346579	207304	41938.5	81552.1	183639	112210	131264	9127.65	33980.7	98981.7	112753	75063.1	203525	80938.5	223330	139938	73245.3	72261.6	35049.7	400543	476062	74956.3	84970.3	61979.2	401249	95555	170218	224370	140014	62141.6	444275	276435	88233	270224	129387	217110	136690	275146	92941.1	251257	88102.1	376661
LIPID-P-0252	GL	DG	660.566	642.522	[M+NH4]+	C41H70O5	19547.6	45696.1	27511.7	18502.5	21446	49683.4	30922.3	36813.8	16270.4	12753.4	25827.1	20954.7	20998	36045.7	23794.5	38659.9	35555.2	25522.6	20555.6	17598.8	134093	143634	29904	25613	18671.8	79816.3	15110.7	55974	55985.1	34654.6	37966.8	180180	64107.6	49142.6	98565.6	53624.1	67045.4	69351.9	81132.9	36259.2	87601.1	31244.1	171442
LIPID-P-0269	GL	DG	684.561	666.522	[M+NH4]+	C43H70O5	15103.2	38802.7	27853.1	61313.9	20759	99520	38818.7	36086.3	11652	34345.6	37171.4	33434.3	28932.6	52678.2	32415.2	112199	59450.5	60948.1	39075.4	58934.5	57370.5	63531.5	37962.3	61747.5	8851.56	49711.5	23970.2	16958.4	25236.6	58787.9	28435.5	75993.9	26177.1	20677.3	33429.3	46848.1	58102.4	41494.6	47423.8	43219.5	54477.8	32853.5	99408.2
LIPID-P-0240	GL	DG	634.55	616.507	[M+NH4]+	C39H68O5	33055.6	150784	47520.9	5554.83	17469.3	72236	24602.5	29356.5	4149.2	28449.8	41532.3	41062.5	18401.7	139595	11061.3	155619	29435.7	23886.2	10549.4	4981.57	174869	323403	13999.5	41778.7	55812.9	109900	40541.5	116671	80910.9	41399.3	10238	130130	168157	20477.5	101855	55605.4	47517.8	33107.1	103929	26373.5	90172.7	28261.1	90390.6
LIPID-P-0182	GL	DG	656.614	638.585	[M+NH4]+	C40H78O5	118889	764280	70785.5	6689.76	38264.3	72601.6	281804	40802.1	10533.3	10304.5	31113.2	50493.5	668021	64150.6	147703	142370	535848	10817.7	96089.9	2802.16	1.58214e+06	853648	20201.5	30337	19715.2	638136	25866.9	1.05249e+06	830833	1.19018e+06	56001.8	2.03408e+06	798942	22155	1.01147e+06	230880	1.36313e+06	442805	831725	459012	112706	1.09273e+06	55606.7
LIPID-P-1639	GL	DG-O	614.609	596.574	[M+NH4]+	C38H76O4	825742	690678	809598	1.77153e+06	828993	944040	961781	853810	818962	1.13396e+06	1.08311e+06	942135	822650	920578	830965	755804	779044	724375	806868	1.1444e+06	795154	778189	792279	878147	767698	622132	725675	834748	763796	660412	848822	776239	1.05697e+06	980524	928477	940097	843282	917598	848461	848360	824186	937950	627348
LIPID-P-1691	GL	DG-O	634.577	616.543	[M+NH4]+	C40H72O4	30174	96037.8	42165.8	3147.19	11984.9	76286.6	12904.5	41993.5	5214.69	16443	51096.4	54251.1	15703.7	124634	14166.5	164742	29382	18737.5	14608.3	5666.2	191418	228921	11174.7	53269.1	37009	85274.5	32244.8	70747.1	79379	36005	20774.7	164670	123836	15047.4	88550.9	70231.9	74676.2	33712.7	111622	36166.1	122200	22300.1	71582.4
LIPID-P-1678	GL	DG-O	666.64	648.606	[M+NH4]+	C42H80O4	1.09232e+06	1.02712e+06	1.94434e+06	1.44848e+06	1.22671e+06	2.40459e+06	1.62009e+06	1.19358e+06	1.50937e+06	1.78023e+06	1.75047e+06	1.16661e+06	1.44998e+06	2.29875e+06	1.39144e+06	2.51386e+06	2.37142e+06	1.53182e+06	1.47118e+06	1.3763e+06	2.67165e+06	1.91733e+06	1.08157e+06	1.43157e+06	1.84463e+06	2.49035e+06	1.70765e+06	2.35855e+06	2.86306e+06	2.34521e+06	2.03408e+06	2.28103e+06	2.04404e+06	2.0293e+06	1.74197e+06	2.15109e+06	2.11199e+06	1.82724e+06	1.98803e+06	1.84027e+06	1.61124e+06	1.82585e+06	2.06975e+06
LIPID-P-1693	GL	DG-O	704.656	686.621	[M+NH4]+	C45H82O4	65227.7	67487.6	105146	30331.8	51295	63758	75839.7	69700.4	40078.6	25962.4	30442.3	44740	34641.7	29841.6	51035.9	48381.7	50557.4	37660	40341.4	43557.1	59515.3	79235	25842.4	34078.2	37427.9	65038.7	27975.9	87738.9	93030.5	52694.6	58408.4	107173	55061.5	53747.7	129343	57260.4	91156.7	88112.7	67290.6	50113.9	63436.8	64189	85757.7
LIPID-P-0001	FA	CAR	162.113	161.105	[M+H]+	C7H15NO3	1.15473e+06	1.57163e+06	1.65702e+06	1.92476e+06	1.62199e+06	1.07868e+06	967248	1.74682e+06	1.6006e+06	353785	733359	1.38515e+06	1.37914e+06	1.25068e+06	1.41456e+06	1.22006e+06	1.23641e+06	280277	1.2885e+06	1.22345e+06	1.77074e+06	1.35742e+06	770388	1.42266e+06	3.18855e+06	2.15171e+06	1.38858e+06	1.71452e+06	977496	2.0537e+06	756050	1.77078e+06	842008	1.05454e+06	998696	674711	1.78445e+06	1.43575e+06	1.3975e+06	1.23442e+06	1.22434e+06	1.41181e+06	1.42379e+06
LIPID-N-0067	FA	FFA	171.139	172.146	[M-H]-	C10H20O2	3.78773e+06	2.80081e+06	3.00655e+06	2.36188e+06	2.63416e+06	3.24435e+06	2.61976e+06	2.74754e+06	2.7574e+06	2.66268e+06	2.54835e+06	2.85148e+06	2.28887e+06	1.30597e+06	2.41093e+06	2.46712e+06	2.83628e+06	2.61195e+06	2.44723e+06	1.12713e+06	2.41046e+06	2.67326e+06	2.11844e+06	2.45414e+06	2.24588e+06	2.58155e+06	2.42705e+06	2.58389e+06	2.46608e+06	3.12624e+06	2.12808e+06	2.98761e+06	2.68748e+06	2.50212e+06	2.25539e+06	2.70618e+06	2.03344e+06	2.06194e+06	991897	2.0194e+06	2.36141e+06	2.00594e+06	2.33963e+06
LIPID-N-0073	FA	FFA	255.232	256.24	[M-H]-	C16H32O2	2.11603e+06	1.66158e+06	989083	1.1964e+06	1.94562e+06	1.22145e+06	906827	899545	1.12637e+06	1.71466e+06	1.08228e+06	1.11216e+06	884469	1.40293e+06	459267	837254	1.71647e+06	1.68966e+06	1.20001e+06	1.34381e+06	851405	936772	1.0989e+06	879360	991585	1.11887e+06	962546	962914	1.39631e+06	733135	666668	841896	1.61251e+06	979377	1.21256e+06	1.10719e+06	801749	1.15683e+06	855247	748146	899217	1.27652e+06	1.68584e+06
LIPID-N-0075	FA	FFA	283.264	284.272	[M-H]-	C18H36O2	4.09561e+06	4.86457e+06	3.92961e+06	5.77993e+06	4.1921e+06	4.85074e+06	3.90033e+06	4.14241e+06	3.59778e+06	3.28823e+06	5.76733e+06	5.79925e+06	5.00564e+06	3.61466e+06	7.84227e+06	4.69164e+06	3.84536e+06	4.57869e+06	4.02967e+06	4.56798e+06	7.06313e+06	3.5367e+06	4.87512e+06	6.39539e+06	5.75867e+06	4.14326e+06	5.26084e+06	5.02927e+06	3.48744e+06	5.17375e+06	4.44088e+06	3.87068e+06	8.47585e+06	3.82336e+06	4.6172e+06	5.14524e+06	4.02476e+06	5.88968e+06	3.63793e+06	3.46577e+06	6.19982e+06	4.18926e+06	4.68901e+06
LIPID-N-0084	FA	FFA	281.248	282.256	[M-H]-	C18H34O2	9.35923e+06	9.66519e+06	8.05216e+06	9.34603e+06	1.25849e+07	5.14408e+06	5.36056e+06	4.46894e+06	2.65764e+06	2.77548e+06	4.85535e+06	3.802e+06	3.67781e+06	4.81152e+06	1.17298e+07	7.09486e+06	8.94712e+06	6.49365e+06	7.04143e+06	7.55016e+06	4.98348e+06	8.78535e+06	2.31632e+06	2.22753e+06	1.70813e+06	9.36836e+06	2.29848e+06	5.38509e+06	5.66464e+06	4.45013e+06	2.7598e+06	5.95302e+06	4.78507e+06	7.08631e+06	1.01574e+07	5.39536e+06	4.15796e+06	1.7975e+07	4.23044e+06	3.98329e+06	7.14476e+06	3.46503e+06	7.6107e+06
LIPID-N-0090	FA	FFA	279.232	280.24	[M-H]-	C18H32O2	3.30572e+06	3.77608e+06	3.47421e+06	1.90307e+06	2.73792e+06	3.32813e+06	1.40831e+06	1.28947e+06	743097	1.20449e+06	2.53623e+06	1.1135e+06	1.33496e+06	3.77021e+06	2.67539e+06	6.45716e+06	2.77337e+06	2.10355e+06	1.48103e+06	1.66206e+06	3.62789e+06	7.01767e+06	784393	1.12889e+06	1.40198e+06	4.83069e+06	1.03404e+06	3.52289e+06	2.95712e+06	2.18933e+06	1.31462e+06	3.1325e+06	3.45335e+06	2.09948e+06	4.92105e+06	2.70397e+06	1.49964e+06	4.63056e+06	2.49432e+06	1.76048e+06	2.90905e+06	1.95663e+06	3.26144e+06
LIPID-N-0695	FA	FFA	297.279	298.287	[M-H]-	C19H38O2	75970.1	108036	72338.8	149712	73128	108688	39219	85811.6	81689.9	82752	113278	125929	114984	41275.2	188597	94898.5	79748.8	69069.6	81673.8	60418.3	218397	71210.2	93799.7	98452.8	99406.7	95702.8	119632	42474.3	105609	126927	55967.4	78278.4	201385	72631.6	111109	86114.7	130543	76793.3	81625.7	44061.1	370054	97625.1	80954.8
LIPID-N-0086	FA	FFA	309.279	310.287	[M-H]-	C20H38O2	350435	515322	399442	504813	424249	421143	297099	364266	342652	339982	459083	440678	431865	330100	602181	432744	329053	318637	353971	416747	629224	428694	333058	370910	226570	430864	382157	355968	452352	424731	273826	394765	584762	308951	502098	357722	384517	477267	316991	284503	900354	363588	443343
LIPID-N-0091	FA	FFA	307.264	308.272	[M-H]-	C20H36O2	229006	244818	210909	378991	239888	231612	161635	242858	207182	200970	247248	192079	160024	232784	242024	280882	239528	210713	196785	298552	250228	264951	156769	170249	147444	233279	132718	193151	195492	170508	130734	175454	179608	148268	249113	186893	154394	224521	163773	168799	200865	150082	223820
LIPID-N-0095	FA	FFA	305.248	306.256	[M-H]-	C20H34O2	56655.6	114059	71288.9	223357	102964	123182	84970.1	74795.2	73751	153051	65666.8	76098.6	79827.7	55654	70419.4	90400.5	58174.5	61077.8	99405.2	76058.5	67555.9	93755.5	73853.1	74513.2	118235	78883.6	53029.7	72340.8	94117.3	75373.6	76827	73103.4	58137.4	79230.7	101091	93642.5	49369.7	92655.1	55106.9	41991.5	86704.1	56414.9	91084.8
LIPID-N-0098	FA	FFA	303.232	304.24	[M-H]-	C20H32O2	581590	464808	1.02133e+06	1.05209e+06	923766	1.18513e+06	681655	487431	478021	957990	678033	554577	474144	755009	728942	1.55779e+06	864695	542928	545329	747582	751446	937546	514813	448142	722593	768540	315952	686704	731573	688485	465638	692857	1.20749e+06	451754	693300	451930	322755	276007	355019	280802	512431	432210	733975
LIPID-N-0101	FA	FFA	301.217	302.225	[M-H]-	C20H30O2	32237.3	63795.5	94944.1	22358	15331.7	149000	17838.6	8699.74	9874.2	24725.4	21202.3	15513.6	18746.7	32235.5	28247.1	57260.5	24525.3	24858.4	14054.4	27345.6	24215.9	23038.3	16534.8	11287.6	23765.3	21586.6	11571.9	17961.5	24040.1	17622.1	23957.5	24108.9	27022.2	16693	15484.4	11958.4	8919.61	10834.3	11547.2	9361.05	41708.9	18049.8	14808
LIPID-N-0710	FA	FFA	323.295	324.303	[M-H]-	C21H40O2	79950	123734	58774.1	116272	88205.6	150756	25918.4	90971	85641.3	47674.9	77814.3	90357.1	95092.7	109829	111370	110313	35241.4	15667.2	86337	46118.3	131269	78745.9	107574	108971	114254	43244	102732	70083	106298	96736	68268.9	34730.2	141663	73281.3	72250.4	131994	90786.6	35457.8	80235.3	63410.6	242189	100317	135062
LIPID-N-0092	FA	FFA	335.295	336.303	[M-H]-	C22H40O2	98556.2	125037	122190	170458	136169	145529	104971	89566	116324	103689	116165	101248	115762	94820.4	166123	78231.7	107709	95542.7	126068	145273	237403	86390.7	81648.1	112982	68593.9	119315	89670.6	89253.8	114471	122371	77553.4	96769.7	176286	94421.5	133694	100278	109786	30086.6	85646.1	86533.4	207863	51740.1	112408
LIPID-N-0096	FA	FFA	333.279	334.287	[M-H]-	C22H38O2	167298	180635	160260	255011	231617	185250	155959	206890	257631	232164	158094	151017	132787	137123	131936	159120	155835	170958	166386	346569	125604	147913	148468	145358	107588	143317	106016	132334	135666	132772	113566	120661	105254	118480	133182	123873	122023	132716	94808.4	131625	124921	120531	142124
LIPID-N-0099	FA	FFA	331.264	332.272	[M-H]-	C22H36O2	241254	271527	182146	449912	320519	326792	152309	173502	238618	242778	219867	182343	159503	169996	200005	237457	394907	232678	170725	400488	207550	189810	123376	147394	101599	198249	81837.7	127785	137894	162669	109505	142405	127593	99244.1	163307	136848	187639	118066	113350	110415	173513	115033	313798
LIPID-N-0102	FA	FFA	329.248	330.256	[M-H]-	C22H34O2	253429	238559	138757	652685	412827	371942	160830	241345	258798	414407	231388	217826	179699	237127	219133	430896	322725	188872	254701	295975	243190	325789	205767	200434	228851	321532	64102.7	179399	213088	190450	146593	132541	196676	119283	284891	205678	166853	100816	176783	118550	263111	106195	456364
LIPID-N-0104	FA	FFA	327.232	328.24	[M-H]-	C22H32O2	2.2617e+06	1.28312e+06	1.46414e+06	3.61274e+06	1.69546e+06	2.29281e+06	992143	1.00919e+06	1.10855e+06	1.47789e+06	1.25965e+06	1.12327e+06	1.00155e+06	1.69217e+06	2.12326e+06	2.82696e+06	2.06439e+06	1.86478e+06	1.44947e+06	3.13865e+06	1.14307e+06	1.38924e+06	1.02026e+06	1.21416e+06	596065	1.51962e+06	496887	842612	1.07536e+06	1.21771e+06	794208	920186	1.01648e+06	789378	1.04313e+06	670988	935265	1.06062e+06	808445	877505	1.26659e+06	884237	1.82143e+06
LIPID-N-0103	FA	FFA	357.279	358.287	[M-H]-	C24H38O2	298610	377227	284561	270672	396967	318791	221049	245902	358423	238674	242151	233722	193978	232879	265331	263961	258110	259691	169183	475726	234215	291019	155679	225466	168320	266434	176123	199702	129332	197005	169562	195698	206233	182095	338275	203477	162930	211700	184115	155136	230176	179416	212014
LIPID-N-0105	FA	FFA	355.264	356.272	[M-H]-	C24H36O2	14135.6	13496.3	12546.1	13182.3	10127.4	12240.5	4908.58	6679.82	6582.12	6963.97	7754	6211.08	4230.41	10538.7	11264.7	11294.7	10801.8	8919	6840.18	22387.4	12946.5	13610.2	5738.08	6125.75	5429.09	13599.4	3133.22	5190.85	6446.72	7800.27	5287.41	5764.13	7801.81	5503.33	13462.5	7227.91	4378.51	6578.73	5548.38	5374.4	7319.8	6378.56	7674.45
LIPID-N-0702	FA	FFA	451.452	452.459	[M-H]-	C30H60O2	206345	205365	163681	200278	146856	88508.8	200182	228513	214415	214454	184845	229673	131561	158117	160653	257208	210019	169501	158413	152896	292976	271436	227519	217841	194854	183239	221437	217505	148253	203676	154175	254727	176167	181545	155970	160006	197218	155149	224232	167795	139406	177284	197314
LIPID-N-0727	FA	FFA	495.42	496.428	[M-H]-	C34H56O2	571206	551190	635759	340882	498298	438570	503173	273733	383843	511379	409706	406987	345151	551338	466053	439255	448170	345126	413835	380869	436452	519653	345149	339672	455037	409052	389814	410342	390526	459670	395966	490128	575349	282879	474950	453016	373517	414472	405549	397333	360288	437538	377499
LIPID-N-0012	ST	BA	448.5	449.314	[M-H]-	C26H43NO5	23722.1	55797.7	34111.3	12686.1	34071.7	6968.58	28224	26130.6	3434.13	11193	10659.8	22247.8	8418.56	4706.24	31128	11662.1	15249.6	6883.53	72738.4	7735.48	20456.7	23697	21136	11706.1	24934.1	11492.1	17042.8	9146.98	20109.9	20967.7	29633.7	122431	78587.7	35092.4	19304.1	24934.1	67623.8	30097.9	22804.8	18576.1	54986.8	34540.8	18105.9
LIPID-N-0015	ST	BA	464.4	465.309	[M-H]-	C26H43NO6	687211	810948	609046	341185	404979	428386	330403	493507	461451	391924	303994	899595	308491	323396	454894	430279	426244	202497	642836	412281	381880	494533	331587	519892	546619	372777	355508	231592	354065	697603	461935	1.73597e+06	763047	722518	453091	677621	1.11011e+06	321352	527307	437278	635862	689555	794731
LIPID-N-0013	ST	BA	448.5	449.314	[M-H]-	C24H38O3	19549.3	46421	28921.6	9103.73	26730.4	3918.41	22823.4	20248.5	4016.31	8402.77	8168.24	19934	5992.14	3774.18	27035.4	9874.94	13249.6	5094.07	60203.7	6701.31	16154.1	18476.5	17326.7	9738.95	22841.9	9038.58	13967.2	6966.79	16606.9	18360.6	26233	94998.3	66905.1	29053	15688.3	20344.6	53517.8	24425.5	19884.9	15221.4	44149.4	29325.4	14183.4
LIPID-P-0317	SP	Hex2Cer	844.614	861.618	[M-H2O+H]+	C46H87NO13	1.28584e+06	2.36849e+06	1.78778e+06	941241	1.24308e+06	1.54108e+06	1.68598e+06	881548	986014	1.56289e+06	1.54815e+06	1.47879e+06	1.13666e+06	1.37075e+06	993871	1.62169e+06	1.49196e+06	749975	1.18483e+06	1.63346e+06	957998	1.00179e+06	738608	1.07064e+06	1.0206e+06	1.13877e+06	1.08642e+06	1.25698e+06	2.03023e+06	1.33474e+06	1.287e+06	769371	972613	1.03264e+06	2.28149e+06	1.10532e+06	951030	1.45206e+06	950521	1.27923e+06	1.05493e+06	1.30244e+06	1.50611e+06
LIPID-P-0318	SP	Hex2Cer	872.646	889.649	[M-H2O+H]+	C48H91NO13	146122	67677.4	52170.6	104527	173021	111661	140529	52100.3	88409.5	118316	125528	71314.4	54986	51796.6	57797.1	149185	115922	49194.8	111830	109189	136132	38374.9	71890.3	106958	116640	99487.7	93950.8	21283.9	135694	65072.3	121363	43096.7	42485.7	109388	147437	122462	27674.2	176674	114571	54883.4	105300	55820.8	116406
LIPID-P-0320	SP	Hex2Cer	928.708	945.712	[M-H2O+H]+	C52H99NO13	106731	271524	177467	107258	199854	198213	188488	93559.3	93546.4	168041	138466	249615	80353.8	105535	129537	120893	131541	112746	72452.1	146920	164057	132121	74922.4	90171.5	83541.6	111149	119773	90985.6	172194	99445.8	90249.5	80364.1	111914	105811	290878	123677	80505.1	207225	78939.3	106741	129145	102553	114413
LIPID-P-0321	SP	Hex2Cer	956.74	973.743	[M-H2O+H]+	C54H103NO13	234117	357235	264687	145766	287069	253702	255551	135266	122325	166256	195911	345237	82224.2	155271	176844	151826	135602	142251	63107.9	213689	189686	176177	88864.8	122721	74353.4	132373	133687	126660	169529	177929	81969.4	62331.6	182638	119896	499214	152903	132984	140164	111969	125531	141768	131599	99562.5
LIPID-P-0323	SP	Hex2Cer	842.599	859.602	[M-H2O+H]+	C46H85NO13	130614	113201	141019	90096.8	90267.9	135947	130232	94249.6	67779.4	207631	141938	81409.3	61712.2	148719	109735	215912	124412	83226.6	106401	121610	83262.7	88509.1	50045.2	128921	86561.3	103625	71877.3	111771	154167	114429	96231.4	76042.3	72457.9	93106.2	101199	136371	72496	115909	74038.2	111352	81371.9	109795	109873
LIPID-P-0325	SP	Hex3Cer	1006.67	1023.67	[M-H2O+H]+	C52H97NO18	212957	167997	194646	129363	194558	173686	238702	179749	74965.5	246128	173304	43191.4	134012	154552	239015	257763	194385	199556	167048	165920	221029	227885	136495	149425	211561	212676	212137	186838	195438	177019	242138	176893	63082.2	208501	172126	243709	160677	225965	174544	225614	176580	173732	129416
LIPID-P-0326	SP	Hex3Cer	1034.7	1051.7	[M-H2O+H]+	C54H101NO18	69390.4	41939	76300.5	54308.6	58807.4	39823.3	47611.9	66950.1	32924	72748.5	57174	18498.1	48733.4	98216.6	126109	79404.5	63599.4	67449.1	54680.1	38312.2	59468.6	25422.1	47877.3	59518.2	61995.2	60123.1	44263.1	43056.9	69560.5	86838.7	67637.9	50224	50182.8	42723.9	49076.7	55469.4	38133.1	84964.3	67176.2	80100.5	40867.8	72376.7	45907.2
LIPID-P-0285	SP	HexCer-NS	520.509	699.565	[M-H2O+H]+	C40H77NO8	39754	27061.9	28054.5	28058.9	38458.9	22189.9	36868.6	42658.3	28905	23965.3	34976	22348.4	33611.5	28441.2	35890.5	28663.5	38822.1	23080.1	31675.2	40527.7	21376.6	25784.6	17782	30835.7	43375	25761	29236.8	47802.7	23765.8	25586.8	39902.4	35552.1	25162.2	12077.7	40688.9	27794.3	38345.4	77935.8	50986.2	31353.2	35706.3	23965.3	35543.4
LIPID-P-0288	SP	HexCer-NS	604.603	783.659	[M-H2O+H]+	C46H89NO8	45508.3	21398.2	29067.2	19951	25931.8	43329.5	38294.1	31919.7	30829.1	57700.1	25977.8	16826.2	16688.4	29700.8	41786.8	36895.7	32178.7	46668.3	25205.5	45511.5	22973.3	33499.2	27770.1	32277.4	47118.7	42504.3	41883.3	34988.3	39886.9	33300.1	20946.6	40348.7	24415.8	17904	48291.2	37139.1	31486.2	43230.1	29262.7	32637.8	28278.3	30748.6	37166.9
LIPID-P-0289	SP	HexCer-NS	602.588	781.643	[M-H2O+H]+	C46H87NO8	116703	124276	148251	90695.3	85705.5	116575	126372	92209.8	174433	134260	100957	93004.5	81842.8	168836	104564	150860	123773	87483.3	96568.2	84462.9	113122	114764	69808.9	85083.1	223649	119319	88613.1	160538	136226	126293	81713.2	153769	110772	93090	191886	217287	153140	265773	186494	147826	126784	86767.3	174509
LIPID-P-0291	SP	HexCer-NS	492.478	671.534	[M-H2O+H]+	C38H73NO8	155662	219177	180501	67479.8	79375.8	133640	153104	70845.6	83993.8	90814.2	106075	73558.5	83914.2	114819	85190	128371	171144	76321.5	78202.9	103528	92254.3	87786.2	52755.2	97439.2	102173	77161.6	100467	185827	183476	63322.8	205178	139867	104369	97935.8	167645	99438.8	148716	102592	112931	144644	66290.5	133291	157948
LIPID-P-0292	SP	HexCer-NS	520.509	699.565	[M-H2O+H]+	C40H77NO8	2.94942e+06	3.98637e+06	2.85862e+06	1.40015e+06	2.88266e+06	3.4604e+06	2.44441e+06	1.5494e+06	1.88459e+06	2.32028e+06	3.24739e+06	2.55978e+06	2.10574e+06	3.18173e+06	2.88769e+06	4.12858e+06	2.62799e+06	2.34748e+06	2.0893e+06	2.76339e+06	2.96658e+06	2.97902e+06	1.25819e+06	2.57647e+06	2.7567e+06	2.78275e+06	1.92013e+06	3.28438e+06	3.39375e+06	2.30159e+06	3.28747e+06	2.26993e+06	2.39195e+06	2.73576e+06	3.54303e+06	3.15578e+06	2.60413e+06	2.3145e+06	2.6464e+06	3.26823e+06	1.71332e+06	2.24032e+06	2.40713e+06
LIPID-P-0302	SP	HexCer-NS	518.494	697.549	[M-H2O+H]+	C40H75NO8	101204	116607	135492	47314.6	57752.2	114558	48179.1	37735.1	79576.2	82798.3	90778.8	56013.7	33863.7	75024.8	81902.8	265935	47310.8	52539.3	83338.4	41240.8	214674	136822	69028.1	63658.9	108545	164837	92469.6	104130	110538	83810.2	39021.7	149279	73792.3	62526.2	128454	135944	93378.5	104488	170867	86889.2	135780	58393	74934.4
LIPID-P-0294	SP	HexCer-NS	548.541	727.596	[M-H2O+H]+	C42H81NO8	179301	146629	142178	170433	254950	170207	228661	171449	151334	315157	198430	173594	127384	198858	261824	278496	127485	201198	204814	288478	106567	184097	181476	137446	217050	213207	287887	123145	195699	203181	140753	108171	98657.3	97091.8	134111	211231	128753	266706	95962.5	179936	149417	131966	129948
LIPID-P-0296	SP	HexCer-NS	576.572	755.628	[M-H2O+H]+	C44H85NO8	106847	78281.3	126561	106700	118461	146807	136221	89118.4	75530	171035	86976.7	88639	66332.9	126993	132519	151733	82729.1	109140	91949.5	175751	93081.4	133189	78043.8	95229.9	145354	151430	178282	85357.3	150549	112268	79964.1	73778.5	65105.4	71523	96997.4	141929	75342.3	194963	94207.1	136277	91029.9	74288.9	129119
LIPID-P-0304	SP	HexCer-NS	574.556	753.612	[M-H2O+H]+	C44H83NO8	28986.8	59401.7	62676	23531.9	17574.8	38006.4	24853.5	15756.7	20759.5	36185.7	30891.6	11798.5	7683.29	41472.4	24344.3	49092.8	14626.4	14739.7	14441	42834.1	52546.3	68839.6	11282.8	24123.4	50626	42523	41527.2	60976.3	70506	27192.5	12571	71090.5	34548.1	14931.4	56206.5	43976.6	17509.5	45436.2	56748.8	38891.3	47609.3	25466.4	40197.3
LIPID-P-0297	SP	HexCer-NS	604.603	783.659	[M-H2O+H]+	C46H89NO8	635402	587024	748862	587182	634440	1.03203e+06	790105	545830	427862	1.06033e+06	557903	446070	253002	658994	807137	814456	513415	608059	499396	936205	592341	753609	448328	519716	633768	876822	799668	428981	831091	645749	406980	518414	467173	381499	581476	698351	453369	891278	617291	624906	458829	429422	554937
LIPID-P-0305	SP	HexCer-NS	602.588	781.643	[M-H2O+H]+	C46H87NO8	142811	392127	435851	63966	97869	484558	93012	57610.6	84132.6	224671	248635	119743	39136.4	390719	103347	413597	73334.9	59811	72257.8	100473	474714	382846	38599.8	134299	283734	277161	128253	448621	366067	96906.6	76852	329192	277846	81986	375050	269086	71746.4	144114	358331	114391	213505	95889.9	130699
LIPID-P-0298	SP	HexCer-NS	618.619	797.674	[M-H2O+H]+	C47H91NO8	169497	218448	206806	131080	208718	314269	190982	129230	144107	289669	154180	124318	57355.6	167550	243640	224084	184212	119612	149557	270866	192352	282886	100760	133211	181342	226423	259157	134549	236099	146978	86534.7	233467	130023	114585	200109	219633	191438	226763	226278	154210	125225	111796	129556
LIPID-P-0299	SP	HexCer-NS	632.635	811.69	[M-H2O+H]+	C48H93NO8	1.56076e+07	2.10536e+07	2.47887e+07	8.54843e+06	1.22407e+07	3.15453e+07	2.48635e+07	1.42292e+07	8.22358e+06	2.30341e+07	1.10539e+07	1.3605e+07	9.90664e+06	1.72794e+07	1.47376e+07	2.65224e+07	1.77244e+07	1.36463e+07	1.41183e+07	1.41676e+07	1.7424e+07	2.18017e+07	1.01616e+07	8.51667e+06	1.62983e+07	1.9582e+07	1.17989e+07	1.66302e+07	1.60624e+07	1.74387e+07	7.87472e+06	1.78013e+07	1.60741e+07	8.8267e+06	1.87136e+07	1.78627e+07	1.00794e+07	1.6511e+07	2.2191e+07	1.16499e+07	1.57107e+07	9.97395e+06	1.80439e+07
LIPID-P-0300	SP	HexCer-NS	646.65	825.706	[M-H2O+H]+	C49H95NO8	730753	1.58916e+06	1.43116e+06	234066	478911	1.36942e+06	644477	462678	169459	558312	341031	361355	405514	569674	440180	1.03669e+06	732159	439273	362678	339036	899331	1.98761e+06	216645	394367	578333	793688	508824	1.01023e+06	1.01359e+06	716358	349761	987062	745301	375089	1.06494e+06	639929	867736	595624	915036	498844	727973	422899	813469
LIPID-P-0301	SP	HexCer-NS	660.666	839.721	[M-H2O+H]+	C50H97NO8	301415	642054	582614	212957	265598	629536	379888	295925	377935	386072	191283	320012	140716	387335	225157	631265	264950	181563	174426	225865	513459	596374	148729	197380	355063	426383	260582	429518	326693	303212	229947	464902	431948	159660	435411	392402	265508	247169	408655	209244	425963	261979	361478
LIPID-P-0311	SP	HexCer-NS	602.588	781.643	[M-H2O+H]+	C46H87NO8	135507	92392.3	112341	113412	112942	171413	161218	100344	104208	207060	110675	82933	50607.8	133346	157433	161052	100959	115029	91700.7	239384	90391.7	135149	97909.6	131823	145680	142441	174266	60891.3	157292	125986	81112.5	90619.4	70064.9	73925.7	89779	149559	90738.9	152203	113530	128698	108487	83767.3	116026
LIPID-P-0312	SP	HexCer-NS	630.619	809.674	[M-H2O+H]+	C48H91NO8	287821	199011	231678	192746	240178	332183	279989	228673	250970	476152	202362	164183	85382.4	244673	339157	392506	174351	278130	209801	438117	213236	273722	241127	289308	337978	280669	306382	123498	260029	258401	118802	200644	133042	174986	229228	297351	187098	196165	224058	183227	197230	179583	152332
LIPID-P-2252	SP	HexCer-NS	646.65	825.706	[M-H2O+H]+	C49H95NO8	64193.1	28022.5	22612.7	23070.4	38448	31666.4	28477.6	55630	38896.9	34431.6	19486.7	24486.2	34026.1	66037.7	56091.5	38535.7	53359.7	61653.8	10465.4	32110	27657.8	72500.6	37267.1	21714.1	38073.6	26034.8	75933.8	48026.5	27130.8	40692	66419.4	49509.2	49711.9	11764.5	43496.5	27593.8	40975.7	22162.5	36787.6	24903.3	44895	32107.4	103972
LIPID-P-2125	SP	HexCer-AP	510.452	689.508	[M-H2O+H]+	C37H71NO10	17902.5	15553.8	12870.6	35085.6	34690.3	12505.6	41293.5	42061.8	52667.8	39939	36174	38313.9	35149.2	14351.4	31365.8	22464.4	18761.1	32856.4	34827.4	31442	12561.3	12487.7	28433.4	34307.6	35387.7	18416	37101.8	39572.2	22541.4	29646.8	38823.9	17611	15838.3	40463.4	38187.8	32587.1	35529.7	29929.5	17693.8	27201.2	20494.5	34742.9	17802.4
LIPID-P-2132	SP	HexCer-AP	686.608	865.664	[M-H2O+H]+	C50H91NO10	32060	96540.6	12716.1	55619.8	198005	13430.5	8872.66	19805.3	16423.8	18445.6	19906.9	12885.7	29981.9	17817.6	13321.3	11591.9	20721.4	114045	19971.4	19781.1	12972.3	50537.3	15446.4	7725.44	6741.09	54944.1	118450	191835	5926.06	9889.54	43440.4	24825.1	9159.42	16328.6	16412.5	8422.6	10201.2	12283.6	8153.26	14469.9	56745	39203.6	12371.1
LIPID-P-2133	SP	HexCer-AP	508.436	687.492	[M-H2O+H]+	C37H69NO10	24447.1	14193.4	65576.8	9077.37	14967.1	25367.3	20334.6	13481.1	12739.1	22779	16988.1	8336.44	7830.04	26507	19943.3	27756.5	15246	16034.8	12508.8	26558.9	13554.4	13629.3	9066.31	11205.7	14413.7	19457.8	14400	20183.4	23526.6	13386.4	10822	15614.8	26660.1	11878	14746.3	12564.7	8539.84	9125.71	13502.6	11098.1	8174.31	10410.8	11521
LIPID-P-2141	SP	HexCer-AP	538.483	717.539	[M-H2O+H]+	C39H75NO10	26445.9	30732.3	14875.5	33166.1	49897.6	27661.9	23522.5	24748.1	22837.3	18656.5	24144.9	15073.3	33843.3	13795.2	27154.5	15513.6	19644.3	34071.4	15714.4	17083.8	24443	41746.7	29879.2	22527.7	20369	25950.7	40560.9	100097	31247.7	25378.4	34381.2	21477.4	19873.5	22313.7	28112.4	11277.2	28647.7	22813.4	18369.8	13796.2	21695.1	31222	15414.1
LIPID-P-2143	SP	HexCer-AP	536.467	715.523	[M-H2O+H]+	C39H73NO10	111958	173440	165615	97646.5	99556.2	138667	139280	105753	118508	145762	108531	78636.7	67457	111212	110620	192318	131482	61518.4	91438.1	133055	179006	209976	65870.5	116927	195639	127680	131212	210916	183358	120571	99569	277112	175048	89961.2	164792	168066	88029.7	126134	175627	68553.8	117287	89100.3	119390
LIPID-P-2144	SP	HexCer-AP	564.499	743.555	[M-H2O+H]+	C41H77NO10	34185.9	100681	65171.3	88791.9	56617.4	50020.8	104283	56537.9	56483.3	105968	33046.7	46393.7	24344.7	34101.1	72342.7	118750	55987.5	31388.3	58594.3	114728	75513.8	69374.1	17989.5	59267.9	93350.7	53458.9	72906.9	66508.4	131043	47692.4	31827.7	173840	74455.5	61551.3	84492.8	97174.4	57740.3	119602	115839	45262.8	59548.9	57473.2	30575.8
LIPID-P-2145	SP	HexCer-AP	616.53	795.586	[M-H2O+H]+	C45H81NO10	180461	175850	214795	156663	214662	185071	222538	184610	216855	289844	205795	161916	164817	244382	264556	291192	218551	197209	213039	221847	172889	195212	163710	178406	180381	180935	208904	176351	233164	217219	228319	151277	125291	198264	219277	208215	195987	216599	149226	295990	191189	200916	175762
LIPID-P-2149	SP	HexCer-AP	784.718	963.774	[M-H2O+H]+	C57H105NO10	52105.2	127521	162797	28160.5	93149.8	133324	53587.3	55572.3	39202.8	75996.6	29310.3	41219	41224.7	83490	32662.7	126667	50112.9	60588.5	82727	26222.3	134596	177009	47115.7	33102.8	71852.6	88508	63257.7	125560	90457.7	102164	30445.4	158801	60738.8	41976.4	96353.2	61229	57771.5	79018.8	122151	58459.9	143354	56911.8	142934
LIPID-P-2150	SP	HexCer-AP	870.827	1049.88	[M-H2O+H]+	C63H119NO10	215983	317561	405715	164008	394925	502439	465554	426311	127996	360274	116865	167652	107901	136483	260933	323442	232668	314253	239068	384251	175226	240552	203002	92731.8	142412	166453	193023	203678	196348	296399	112243	194687	214302	132328	193223	125463	156792	130506	177199	123810	308055	110432	350719
LIPID-P-2151	SP	HexCer-AP	898.859	1077.91	[M-H2O+H]+	C65H123NO10	141284	129171	209954	111098	182015	293063	197968	206646	48804.4	115061	48262.7	91931.2	45872.6	85948.1	136543	106015	114056	130807	90892.1	162972	88239.3	120083	82327	43178.7	56710.9	95837.2	81463.2	74389.1	62985.4	98657.9	44357	75339.2	94403.9	36946.9	80509.9	58811.6	73395.2	66154.9	69635.8	46382.2	92153	51944	95298.7
LIPID-P-2153	SP	HexCer-AP	540.499	719.555	[M-H2O+H]+	C39H77NO10	8029.66	8518.08	14338.1	15101.7	14607.7	4029.89	14748.3	14287	3671.2	12979.3	4465.15	15148.3	14344.1	7721.8	2825.14	14700.7	6835.45	15162.1	7254.83	6490.89	18494.9	9373.34	11356.2	10855.8	3213.79	10645.2	11766.2	27178	7757.35	18013	11887	5587.66	1213.13	1239.71	8624.24	13536.2	8113.15	10188.1	7744.94	10551.6	17195.5	10186.9	10186.5
LIPID-P-2158	SP	HexCer-AP	666.639	845.696	[M-H2O+H]+	C48H95NO10	44752.8	51860	50935.5	58438.3	44576.5	49324.1	51835.3	45458.9	62658.7	90334.8	61857	37214.7	29497.3	44870.1	60015	59115.6	47243	41874.5	38954.7	54651.5	37631.2	60254.2	41926.2	42196	58363	54530.9	60399.6	45267.9	59505.4	54251.9	41444	42640.8	25390.2	33289.2	42294	46746.5	40710.2	91827.3	43781.4	57004.1	33673	43575	50330.4
LIPID-P-2159	SP	HexCer-AP	608.561	787.617	[M-H2O+H]+	C44H85NO10	22981.5	23240.9	17537	37245.8	40518.6	15539.3	30915.6	30494.1	40935.8	50520.2	25490.1	26574.2	23618.7	18151.1	24518.7	23592.4	16471.1	31065.3	33302.8	50335.4	10362.8	17382.3	32172.2	27045.4	23837.9	16303.9	32302.2	25878.3	18826.7	43257.9	37743.7	19459.4	15613.1	40069.4	34801.2	22617.2	31016.5	32932.7	20710.9	25120.7	15530.9	21492.2	20005.8
LIPID-P-2161	SP	HexCer-AP	606.546	785.602	[M-H2O+H]+	C44H83NO10	11693.4	12374.1	18374.3	30539.7	51820.9	20078.1	32937.8	43850.2	41540.6	42986.4	18895.9	46402.8	33159.8	20819.5	19153.5	9541.37	11538.3	32235.2	31256.5	51460.8	10562.4	11544.7	35923.3	25166.6	24452.2	15192.9	28734.7	22497.5	22541.3	20239.9	27805.9	16854.7	15777	41448.8	22080.9	27446.9	25123.5	41976.9	17992.1	23053.7	21357.7	31859.8	16120.9
LIPID-P-2167	SP	HexCer-AP	882.827	1061.88	[M-H2O+H]+	C64H119NO10	133580	195053	207049	114824	135355	164083	172817	158994	44084.7	136350	103867	207299	141494	150769	142537	185060	189562	157330	165743	127017	189333	161017	162397	129455	142737	152263	131413	179307	166283	168800	140777	175213	149787	166733	185553	116926	140028	134163	153763	119453	172575	139225	225610
LIPID-P-2168	SP	HexCer-AP	606.546	785.602	[M-H2O+H]+	C44H83NO10	23748.7	26572	37560.1	85031.6	100604	32003.5	48895.4	90374.8	77746.2	79097.9	61843.6	80957.2	92607.1	28591.4	49930.8	28535.9	24036.4	52122.6	73241.4	107879	23991.8	27811	67080.7	67229.9	77584.1	24699.9	55532.3	42833.4	32784.4	48720	51850.2	28169.8	31543.9	66163.3	37106.6	54384.9	47711.4	79457.8	41529.7	39691.9	34467.9	52981.5	31857.4
LIPID-N-0957	GP	LNAPE	690.507	691.515	[M-H]-	C37H74NO8P	173483	187498	117045	117289	75089.3	102735	156772	138029	171959	177498	125491	100430	89873.3	121863	129478	112725	152321	92817	84545.6	150083	137400	92115.1	133972	111005	172836	83303.1	123014	222787	116526	148879	169109	186026	112150	128266	183084	265150	152255	133538	216894	280435	143052	188201	145482
LIPID-N-0959	GP	LNAPE	716.523	717.531	[M-H]-	C39H76NO8P	232612	540943	756714	179232	205548	1.03494e+06	251052	259068	309414	375895	691104	702433	130007	984488	164022	1.03416e+06	212199	196563	160589	189354	1.26723e+06	1.21069e+06	145642	499013	764652	738482	356718	1.27579e+06	1.05182e+06	345866	220201	1.19384e+06	583901	488034	1.20004e+06	1.19062e+06	396361	334362	1.0903e+06	391485	989391	467216	734155
LIPID-N-0958	GP	LNAPE	688.492	689.5	[M-H]-	C37H72NO8P	13022.1	75153.3	29468.2	43542.7	44311	49117.1	38648.7	69004.3	25111	153321	65079.2	223383	25111	76354.7	19455.4	115190	47439.2	31499.2	22296.1	62176.5	59908.5	90250.3	7336.47	55123.9	97414.2	45089	26722.2	77406.8	79988.2	43600.3	34338.9	93076.2	24222.2	68197.5	105106	114278	22122.7	35959.6	50036	25946	87058.4	69663	49016.5
LIPID-N-0964	GP	LNAPE	740.523	741.531	[M-H]-	C41H76NO8P	378601	589518	1.92558e+06	179477	519117	1.18461e+06	725417	394184	202542	673828	1.04622e+06	1.14675e+06	682086	1.20371e+06	735061	1.62453e+06	1.09815e+06	479995	427639	163021	4.09693e+06	2.87559e+06	444012	541232	1.44923e+06	2.47239e+06	845457	2.71364e+06	2.64001e+06	1.44985e+06	1.20586e+06	3.89865e+06	1.07721e+06	2.68458e+06	2.37673e+06	2.93222e+06	1.90595e+06	2.32504e+06	3.34584e+06	1.94433e+06	2.22133e+06	2.78627e+06	3.57164e+06
LIPID-N-0965	GP	LNAPE	738.507	739.515	[M-H]-	C41H74NO8P	14000.3	7828.07	40395.8	8827.17	37283.7	40862.2	37412.5	24060.1	6957.23	18247.7	53199.1	41858.7	32203.3	49932.4	27806.3	58421	49705.9	52914	26038.5	17447	229197	168403	19191	22243.1	55836.9	133280	73888.8	153791	179916	82388.1	66824.1	146043	53122.2	128882	121991	109282	101186	128871	125157	98626.9	116228	125776	138770
LIPID-N-0615	GP	LPA	409.236	410.243	[M-H]-	C19H39O7P	77145.6	131422	155149	58590.4	73850.4	138172	102395	80360	71188.8	53340.2	47714.5	57957.8	50877.3	61925.3	57609.1	105084	62389.8	41411.6	72119.3	39264.5	92101.4	54455.8	29717	50979.3	72415.3	72596.4	45920.1	78001.2	47277.5	77341.6	48707.9	57966.4	81889.6	41112.6	48425	65668.3	30712.5	33539.4	38107.8	44905	60592.7	29644.7	70746.6
LIPID-N-0617	GP	LPA	435.259	436.259	[M-H]-	C21H41O7P	83804.9	154649	260368	45906.2	85047.6	203457	110699	60387.3	48555.2	59161.6	52671	47569.1	55363.6	56086.5	60811.8	110961	67368.3	31226.1	71352.4	16479	157836	63535.3	15066.6	45388.4	86027.9	96607	35146.5	98314.9	26790.2	85682.4	56443.1	89071.1	85757.9	51278.2	66620.7	104025	31995.3	55267.2	32185.4	58381.6	69961.8	33053.3	116436
LIPID-N-0618	GP	LPA	433.236	434.243	[M-H]-	C21H39O7P	185436	231848	395148	83048.3	196437	320629	209358	107363	55830.4	74924.7	107644	53124.5	110658	85636.3	140944	174315	156728	59970.6	106006	28236.3	365284	126705	26455	80494.3	114360	222732	83401.3	234195	45467.2	193400	126032	202767	189994	118531	171794	234065	71942.1	108487	74322.1	146368	183816	96520.1	289968
LIPID-N-0619	GP	LPA	457.236	458.243	[M-H]-	C23H39O7P	253324	200778	301396	203170	360694	471501	311641	241621	228571	156269	150855	141704	188129	125021	179451	254792	209532	88542.3	207381	72642	265404	123805	41589	163671	172891	206547	103333	193462	40568.3	186108	141952	164932	168775	85395.3	138363	217992	67341.8	90579	58386.5	102087	145075	93469.9	158332
LIPID-N-0620	GP	LPA	481.236	482.243	[M-H]-	C25H39O7P	84999.8	98536.1	107655	59140.8	133008	184649	129792	83243.1	109764	71945.7	58565.5	50670.3	56356.6	42736.9	76778.4	148316	70283.8	50162.9	74632.1	49090.3	98449.5	74335.2	19921	71203.9	57884.7	65967	27950.7	90713.2	19756.7	100683	48054.6	73440.4	67790.1	28820.5	45732.2	51517	32574.3	43861	26300	35614.4	52814.7	38035.6	52109.3
LIPID-P-0351	GP	LPC	482.322	481.317	[M+H]+	C23H48NO7P	7.62584e+06	5.91928e+06	8.98853e+06	5.58207e+06	6.07329e+06	7.39579e+06	5.74031e+06	9.19938e+06	1.03218e+07	4.58026e+06	5.32066e+06	7.30374e+06	2.99189e+06	7.7305e+06	4.63156e+06	7.82589e+06	6.0447e+06	6.62054e+06	3.52326e+06	6.6442e+06	6.49992e+06	7.8172e+06	4.54119e+06	7.62498e+06	8.08243e+06	6.1052e+06	9.63284e+06	8.74629e+06	7.53526e+06	5.55939e+06	9.94344e+06	8.43982e+06	6.88488e+06	5.47184e+06	5.35014e+06	5.79978e+06	4.17378e+06	3.61653e+06	6.24228e+06	4.72778e+06	6.62389e+06	4.7146e+06	5.49309e+06
LIPID-P-0353	GP	LPC	496.34	495.332	[M+H]+	C24H50NO7P	1.39889e+07	8.04574e+06	1.82132e+07	1.01199e+07	1.27662e+07	1.54448e+07	1.42352e+07	1.32386e+07	1.45928e+07	1.11727e+07	1.0356e+07	1.10314e+07	7.7674e+06	1.28545e+07	9.92893e+06	1.68136e+07	1.13498e+07	1.2066e+07	9.63353e+06	1.17567e+07	1.17542e+07	1.3991e+07	7.86452e+06	1.02586e+07	1.01193e+07	1.23921e+07	1.12879e+07	1.67082e+07	1.42147e+07	1.16639e+07	1.107e+07	1.21826e+07	1.23171e+07	1.01683e+07	9.52235e+06	1.04917e+07	6.74812e+06	5.85383e+06	1.09728e+07	9.76944e+06	1.01928e+07	9.35738e+06	1.00214e+07
LIPID-P-0355	GP	LPC	510.356	509.348	[M+H]+	C25H52NO7P	2.11588e+07	1.31592e+07	2.95217e+07	1.22846e+07	1.84435e+07	1.97406e+07	1.55096e+07	1.96779e+07	1.67469e+07	8.75013e+06	1.2535e+07	1.19423e+07	8.33753e+06	1.83773e+07	1.48857e+07	1.92298e+07	1.74016e+07	1.77828e+07	9.85394e+06	1.24532e+07	1.9197e+07	2.20492e+07	1.21554e+07	1.52107e+07	1.25118e+07	1.77795e+07	1.79812e+07	2.78801e+07	1.86064e+07	1.65084e+07	1.92729e+07	1.89712e+07	1.84907e+07	1.19149e+07	1.62506e+07	1.43131e+07	1.21413e+07	1.01155e+07	1.6027e+07	1.22608e+07	1.33485e+07	1.26118e+07	1.6072e+07
LIPID-P-0357	GP	LPC	524.372	523.364	[M+H]+	C26H54NO7P	3.13895e+06	1.99697e+06	4.99332e+06	2.42282e+06	3.27707e+06	3.81248e+06	3.82911e+06	3.02452e+06	2.38625e+06	2.17826e+06	2.51112e+06	2.09829e+06	1.89494e+06	3.19171e+06	2.51733e+06	3.84438e+06	2.60927e+06	2.71291e+06	2.15104e+06	2.19706e+06	3.2345e+06	3.62972e+06	2.34582e+06	2.4124e+06	2.49473e+06	3.15098e+06	2.76133e+06	4.30922e+06	3.68919e+06	2.98567e+06	2.77874e+06	2.99444e+06	2.99165e+06	2.32943e+06	2.97489e+06	2.60661e+06	1.94855e+06	1.74001e+06	2.65886e+06	2.24051e+06	2.51539e+06	2.15352e+06	2.63772e+06
LIPID-P-0370	GP	LPC	522.356	521.348	[M+H]+	C26H52NO7P	4.70239e+06	4.14424e+06	8.38904e+06	3.94569e+06	4.88969e+06	6.63454e+06	5.37632e+06	4.03017e+06	3.82344e+06	5.87198e+06	4.81798e+06	3.7622e+06	3.49129e+06	5.62549e+06	4.42833e+06	6.06201e+06	4.73545e+06	4.28617e+06	3.58125e+06	3.01585e+06	5.7846e+06	6.25863e+06	3.27544e+06	3.68701e+06	4.35059e+06	6.04366e+06	4.50126e+06	7.29242e+06	5.62159e+06	4.78335e+06	5.44558e+06	5.76007e+06	4.94268e+06	5.56459e+06	6.24211e+06	7.08629e+06	4.13892e+06	5.24333e+06	6.13175e+06	5.22464e+06	5.25805e+06	4.82099e+06	5.60247e+06
LIPID-P-0378	GP	LPC	520.34	519.332	[M+H]+	C26H50NO7P	6.60421e+06	5.31383e+06	1.0765e+07	4.72737e+06	6.59356e+06	7.07e+06	6.48996e+06	4.74675e+06	3.73308e+06	4.88973e+06	6.02611e+06	2.91804e+06	4.29745e+06	6.48555e+06	5.58388e+06	6.86917e+06	6.89144e+06	5.6819e+06	3.10495e+06	3.64327e+06	8.69139e+06	9.47977e+06	3.15878e+06	4.13226e+06	4.50694e+06	9.9736e+06	6.65195e+06	1.12611e+07	8.38455e+06	7.59348e+06	7.97173e+06	9.4287e+06	7.40586e+06	8.28604e+06	9.3444e+06	9.66194e+06	6.70972e+06	7.7895e+06	9.18883e+06	8.38791e+06	9.27291e+06	8.7434e+06	9.87563e+06
LIPID-P-0359	GP	LPC	538.388	537.379	[M+H]+	C27H56NO7P	735135	440458	1.11143e+06	228924	478100	575660	433243	521095	326036	237692	292482	250506	214931	446374	411585	470891	399753	412038	279161	237462	661088	575255	354624	400869	348862	558059	563226	899074	678696	456135	459178	485203	509827	298029	434003	377130	351008	250913	455205	295595	357999	306946	367379
LIPID-P-0361	GP	LPC	552.403	551.395	[M+H]+	C28H58NO7P	1.09626e+06	842345	2.47797e+06	520170	745292	1098881	1.13627e+06	799326	603131	600682	638175	668374	556968	745718	806183	784165	944748	898156	523652	549210	1.25938e+06	1.12696e+06	630964	589774	703203	1.13135e+06	734762	1.51955e+06	1.21186e+06	969256	898602	991426	1.11662e+06	1.03418e+06	986691	836829	931921	674672	1.00767e+06	799446	715804	796637	1.00455e+06
LIPID-P-0373	GP	LPC	550.387	549.379	[M+H]+	C28H56NO7P	2.53407e+06	2.35211e+06	7.97561e+06	1.16676e+06	2.0742e+06	2.38993e+06	2.73389e+06	1.40492e+06	1.18643e+06	1.70875e+06	1.71771e+06	1.30778e+06	1.32696e+06	1.87302e+06	2.65466e+06	2.13828e+06	2.14237e+06	1.46398e+06	1.39194e+06	1.00056e+06	3.85779e+06	2.92749e+06	1.23801e+06	1.05136e+06	1.59361e+06	2.81252e+06	1.85678e+06	4.84932e+06	3.09583e+06	3.41563e+06	3.19798e+06	3.08399e+06	2.87773e+06	3.45349e+06	3.11132e+06	2.49385e+06	1.72378e+06	1.95048e+06	2.27021e+06	3.02045e+06	1.71507e+06	2.66339e+06	3.60662e+06
LIPID-P-0380	GP	LPC	548.372	547.364	[M+H]+	C28H54NO7P	9.97519e+06	7.07999e+06	1.72848e+07	1.36224e+07	1.01553e+07	1.21178e+07	1.1466e+07	1.12511e+07	1.07715e+07	1.2138e+07	1.06218e+07	6.93457e+06	5.86907e+06	1.15311e+07	8.80401e+06	1.32444e+07	9.17978e+06	7.66518e+06	6.19566e+06	8.40064e+06	1.85413e+07	1.7397e+07	5.70292e+06	8.84371e+06	1.1883e+07	1.47333e+07	7.40492e+06	2.46023e+07	1.51801e+07	1.03891e+07	1.2233e+07	1.46515e+07	1.48085e+07	1.22471e+07	1.4814e+07	1.63131e+07	8.48722e+06	9.42808e+06	1.25745e+07	1.4376e+07	9.45539e+06	1.15873e+07	1.09718e+07
LIPID-P-0375	GP	LPC	578.419	577.411	[M+H]+	C30H60NO7P	243990	246820	462927	146951	209647	313040	227482	170139	236686	181484	138101	105408	132949	197093	172772	140060	198024	205020	127264	119059	215799	145122	130116	145632	156064	174414	155888	231599	195054	174576	215537	154353	202099	187170	174475	192644	128962	190055	155273	188589	153421	163209	183033
LIPID-P-0387	GP	LPC	572.372	571.364	[M+H]+	C30H54NO7P	5.17399e+06	3.38213e+06	4.14503e+06	4.38248e+06	5.51909e+06	5.8909e+06	4.52593e+06	5.71631e+06	5.30778e+06	6.43135e+06	5.18405e+06	3.81202e+06	2.90914e+06	5.0974e+06	4.2367e+06	5.52497e+06	4.56621e+06	3.90608e+06	3.36824e+06	4.89873e+06	3.82605e+06	4.46563e+06	3.47226e+06	4.56656e+06	4.48029e+06	4.02001e+06	3.97162e+06	4.71743e+06	4.13137e+06	3.6808e+06	4.68269e+06	3.77109e+06	4.15292e+06	3.49222e+06	4.28559e+06	5.67853e+06	3.27572e+06	3.55756e+06	4.65501e+06	3.79527e+06	4.54054e+06	4.22716e+06	3.81612e+06
LIPID-P-0390	GP	LPC	570.364	569.348	[M+H]+	C30H52NO7P	3.19203e+06	1.21008e+06	2.78688e+06	3.2054e+06	3.09481e+06	3.14946e+06	2.56778e+06	2.82408e+06	2.03494e+06	3.04332e+06	2.33334e+06	1.9366e+06	1.77449e+06	2.76134e+06	2.65588e+06	3.37048e+06	2.29705e+06	2.58706e+06	2.17448e+06	3.01785e+06	2.00869e+06	3.00107e+06	2.03684e+06	2.4053e+06	1.30028e+06	2.42142e+06	1.67944e+06	3.04088e+06	2.36206e+06	2.48425e+06	1.96928e+06	2.31134e+06	2.12408e+06	1.90979e+06	2.53608e+06	2.27515e+06	1.93701e+06	2.45791e+06	2.80235e+06	1.91093e+06	2.91461e+06	1.99888e+06	2.26807e+06
LIPID-P-0350	GP	LPC	468.309	467.301	[M+H]+	C22H46NO7P	3.42563e+07	1.82338e+07	3.38281e+07	2.26955e+07	2.42453e+07	2.36774e+07	2.70152e+07	3.84807e+07	3.79848e+07	1.91524e+07	1.83788e+07	2.17325e+07	1.03351e+07	1.87817e+07	1.25891e+07	2.05935e+07	2.71793e+07	2.28856e+07	1.32672e+07	1.99334e+07	1.79311e+07	2.11476e+07	1.51956e+07	2.10366e+07	2.22703e+07	2.76159e+07	2.59464e+07	5.28619e+07	3.9398e+07	3.38886e+07	5.78123e+07	5.35851e+07	2.37339e+07	2.72372e+07	3.03935e+07	4.22377e+07	2.55447e+07	2.04178e+07	3.24185e+07	3.17756e+07	2.22704e+07	3.04251e+07	2.44084e+07
LIPID-P-0352	GP	LPC	482.322	481.317	[M+H]+	C23H48NO7P	7.61985e+06	5.86055e+06	9.02106e+06	5.54909e+06	6.30686e+06	7.41195e+06	5.72608e+06	9.30643e+06	1.06357e+07	4.63476e+06	5.62961e+06	7.37116e+06	3.07867e+06	7.85186e+06	4.64927e+06	7.79269e+06	5.97308e+06	6.64499e+06	3.57081e+06	6.71761e+06	6.59428e+06	7.95053e+06	4.63409e+06	7.61067e+06	8.54096e+06	6.18749e+06	9.68294e+06	8.86447e+06	7.60285e+06	5.51064e+06	1.04006e+07	8.65585e+06	6.95999e+06	5.41181e+06	5.4193e+06	6.09012e+06	4.26633e+06	3.6217e+06	6.25873e+06	4.74606e+06	6.93308e+06	4.88544e+06	5.49646e+06
LIPID-P-0354	GP	LPC	496.34	495.332	[M+H]+	C24H50NO7P	8.79564e+06	7.08815e+06	1.28532e+07	7.56568e+06	9.57988e+06	1.06903e+07	9.44465e+06	8.91646e+06	7.46793e+06	8.95659e+06	8.12245e+06	8.02113e+06	5.86387e+06	9.12322e+06	8.23884e+06	1.15882e+07	8.5595e+06	8.04042e+06	8.14312e+06	7.42115e+06	8.11312e+06	8.55762e+06	6.91088e+06	7.22168e+06	8.01121e+06	8.70205e+06	7.95004e+06	1.04635e+07	9.63552e+06	8.97256e+06	7.33345e+06	7.91099e+06	8.70807e+06	7.04039e+06	8.59844e+06	8.36698e+06	6.01373e+06	5.61028e+06	7.77303e+06	6.23219e+06	7.81113e+06	7.22802e+06	7.05528e+06
LIPID-P-0368	GP	LPC	494.325	493.317	[M+H]+	C24H48NO7P	9.08293e+07	7.70737e+07	1.22424e+08	1.68102e+08	1.17909e+08	1.30295e+08	1.26948e+08	1.56094e+08	1.68336e+08	2.15118e+08	1.15285e+08	2.07862e+08	7.01624e+07	1.24037e+08	8.87175e+07	1.49466e+08	9.49111e+07	8.21649e+07	7.78807e+07	1.22755e+08	8.10138e+07	9.90645e+07	6.63034e+07	1.05347e+08	1.5607e+08	9.86651e+07	8.50255e+07	1.46984e+08	1.2338e+08	7.802e+07	9.12965e+07	7.65679e+07	8.89555e+07	1.01331e+08	9.4266e+07	1.59588e+08	4.1668e+07	6.09221e+07	9.58423e+07	6.40507e+07	8.33066e+07	7.90574e+07	4.99812e+07
LIPID-P-0356	GP	LPC	510.356	509.348	[M+H]+	C25H52NO7P	2.25802e+07	1.38703e+07	3.04912e+07	1.30523e+07	1.95288e+07	2.115e+07	1.67013e+07	2.14195e+07	1.85724e+07	9.18052e+06	1.36788e+07	1.3191e+07	8.90973e+06	1.99977e+07	1.57963e+07	2.02378e+07	1.85559e+07	1.90131e+07	1.07513e+07	1.33348e+07	2.069e+07	2.42202e+07	1.29517e+07	1.62247e+07	1.39717e+07	1.90358e+07	2.00506e+07	2.98542e+07	2.05272e+07	1.74111e+07	2.04831e+07	2.04375e+07	1.98378e+07	1.26798e+07	1.7599e+07	1.54253e+07	1.3527e+07	1.07015e+07	1.74383e+07	1.39573e+07	1.47219e+07	1.3716e+07	1.81135e+07
LIPID-P-0369	GP	LPC	508.339	507.332	[M+H]+	C25H50NO7P	6.33273e+06	6.39339e+06	1.09159e+07	7.58382e+06	5.13425e+06	8.32009e+06	4.67173e+06	6.77992e+06	7.60604e+06	5.72153e+06	5.8254e+06	6.84193e+06	3.28544e+06	7.55463e+06	5.29376e+06	7.67001e+06	5.29986e+06	6.46104e+06	3.49022e+06	4.94726e+06	6.00888e+06	6.59573e+06	3.98575e+06	6.32285e+06	7.70111e+06	6.00241e+06	7.00812e+06	8.86689e+06	6.28949e+06	6.27888e+06	8.75996e+06	6.91933e+06	6.00226e+06	4.7525e+06	5.989e+06	6.62895e+06	3.07696e+06	4.22514e+06	5.71006e+06	3.72993e+06	5.56254e+06	4.10199e+06	3.85328e+06
LIPID-P-0358	GP	LPC	524.372	523.364	[M+H]+	C26H54NO7P	1.71991e+06	1.02216e+06	3.01501e+06	1.10197e+06	1.6204e+06	2.09834e+06	2.03587e+06	1.54647e+06	1.09401e+06	948893	1.04559e+06	876858	974311	1.64733e+06	1.18096e+06	1.78757e+06	1.33397e+06	1.2534e+06	924018	998550	1.59497e+06	1.78907e+06	1.12078e+06	1.06205e+06	1.17994e+06	1.51837e+06	1.27703e+06	2.36017e+06	1.78669e+06	1.48415e+06	1.31102e+06	1.47527e+06	1.69492e+06	1.04992e+06	1.38083e+06	1.24854e+06	823883	699235	1.26272e+06	1.02321e+06	1.17291e+06	923928	1.39639e+06
LIPID-P-0371	GP	LPC	522.356	521.348	[M+H]+	C26H52NO7P	4.58126e+06	4.20814e+06	8.36394e+06	4.09945e+06	4.89661e+06	6.50326e+06	5.26249e+06	3.97182e+06	3.8106e+06	5.78612e+06	4.76299e+06	3.63819e+06	3.45465e+06	5.72507e+06	4.37003e+06	6.10834e+06	4.76254e+06	4.32037e+06	3.58532e+06	2.96766e+06	5.7645e+06	6.29903e+06	3.21959e+06	3.70127e+06	4.35807e+06	6.08325e+06	4.45975e+06	7.15552e+06	5.64345e+06	4.67625e+06	5.47939e+06	6.00589e+06	5.05747e+06	5.54142e+06	5.95383e+06	7.2111e+06	4.1922e+06	5.1353e+06	6.03597e+06	5.11462e+06	5.25934e+06	4.72837e+06	5.55467e+06
LIPID-P-0379	GP	LPC	520.34	519.332	[M+H]+	C26H50NO7P	6.69985e+06	5.10697e+06	1.05115e+07	4.7456e+06	6.41572e+06	6.99555e+06	6.03745e+06	4.74404e+06	3.60762e+06	4.86311e+06	5.96752e+06	2.80358e+06	4.18175e+06	6.47192e+06	5.51134e+06	6.89235e+06	6.81694e+06	5.47095e+06	3.01767e+06	3.56194e+06	8.55847e+06	9.40795e+06	3.21852e+06	4.11506e+06	4.31938e+06	9.43597e+06	6.79874e+06	1.11028e+07	8.28524e+06	7.50131e+06	7.69371e+06	9.26858e+06	7.15588e+06	8.27129e+06	9.1921e+06	9.73393e+06	6.89606e+06	7.57551e+06	9.05941e+06	8.23097e+06	9.31509e+06	8.2755e+06	9.76023e+06
LIPID-P-0383	GP	LPC	518.325	517.317	[M+H]+	C26H48NO7P	8.55003e+06	7.02498e+06	2.1087e+07	1.4713e+07	7.44317e+06	1.13535e+07	6.95884e+06	6.96867e+06	1.04132e+07	1.27963e+07	1.18533e+07	1.02795e+07	4.05989e+06	1.44169e+07	6.66492e+06	1.48503e+07	7.75954e+06	6.2455e+06	3.27249e+06	3.64962e+06	1.78684e+07	2.17006e+07	3.62563e+06	6.82301e+06	1.63319e+07	1.51365e+07	1.05775e+07	2.49478e+07	1.82902e+07	1.20972e+07	2.18361e+07	2.18541e+07	1.39505e+07	1.49584e+07	1.54119e+07	1.73977e+07	6.44716e+06	7.63762e+06	1.59161e+07	7.65462e+06	1.72796e+07	9.41006e+06	1.53612e+07
LIPID-P-0360	GP	LPC	538.388	537.379	[M+H]+	C27H56NO7P	691976	415304	1.01987e+06	204432	463023	537429	420860	464988	288850	222791	271121	225930	200293	409070	370463	454100	380597	398637	260088	232336	580954	539054	313112	370231	316703	501454	502920	814074	624611	422360	404470	427793	472207	265316	385570	326528	335895	246512	411136	264884	339126	273526	330473
LIPID-P-0372	GP	LPC	536.371	535.364	[M+H]+	C27H54NO7P	1.59458e+06	1.48358e+06	3.6506e+06	1.27345e+06	1.68337e+06	2.3513e+06	1.4193e+06	1.48379e+06	1.47881e+06	1.48213e+06	1.56626e+06	994766	768894	2.31064e+06	1.44675e+06	2.46658e+06	1.45329e+06	1.49073e+06	926334	956255	2.48094e+06	2.65308e+06	982037	1.47145e+06	1.8426e+06	2.28045e+06	2.04092e+06	3.55869e+06	2.35082e+06	1.62614e+06	2.33695e+06	2.39927e+06	2.21093e+06	1.71707e+06	2.30294e+06	2.30285e+06	1.13495e+06	1.35382e+06	1.95001e+06	1.5072e+06	1.69259e+06	1.27595e+06	1.85006e+06
LIPID-P-0362	GP	LPC	552.403	551.395	[M+H]+	C28H58NO7P	1.07548e+06	766981	2.31594e+06	501859	692191	995629	1.07082e+06	764762	594525	540542	595813	595460	529766	738590	754061	734516	910571	805975	509360	545282	1.15968e+06	1.05371e+06	580600	569306	639377	1.09866e+06	693699	1.4201e+06	1.1487e+06	908149	840882	924087	1.11369e+06	977632	896486	794058	853383	650073	939211	732278	702177	716833	950815
LIPID-P-0374	GP	LPC	550.387	549.379	[M+H]+	C28H56NO7P	2.66172e+06	2.09916e+06	8.15353e+06	1.18404e+06	2.09294e+06	2.40967e+06	2.65223e+06	1.37994e+06	1.1859e+06	1.67215e+06	1.73208e+06	1.30168e+06	1.369e+06	1.88391e+06	2.61555e+06	2.10677e+06	2.12643e+06	1.48308e+06	1.42177e+06	1.02104e+06	3.8952e+06	3.07005e+06	1.17145e+06	1.08737e+06	1.60587e+06	2.89487e+06	1.87161e+06	4.96668e+06	3.06624e+06	3.34365e+06	3.11439e+06	3.22657e+06	2.92146e+06	3.44893e+06	3.13173e+06	2.53636e+06	1.68648e+06	1.95032e+06	2.24503e+06	2.85196e+06	1.73175e+06	2.65394e+06	3.57769e+06
LIPID-P-0381	GP	LPC	548.372	547.364	[M+H]+	C28H54NO7P	1.04682e+07	7.44489e+06	1.7545e+07	1.41007e+07	1.04332e+07	1.21761e+07	1.17225e+07	1.15905e+07	1.11016e+07	1.28584e+07	1.04817e+07	7.14479e+06	5.9485e+06	1.16793e+07	9.20842e+06	1.35746e+07	9.63199e+06	7.70841e+06	6.58466e+06	8.67456e+06	1.91613e+07	1.7836e+07	5.80763e+06	9.01112e+06	1.16716e+07	1.5218e+07	7.8335e+06	2.55523e+07	1.55539e+07	1.01423e+07	1.25306e+07	1.55627e+07	1.52944e+07	1.23993e+07	1.51487e+07	1.66255e+07	8.75552e+06	9.94455e+06	1.34553e+07	1.5057e+07	9.6998e+06	1.15623e+07	1.11937e+07
LIPID-P-0384	GP	LPC	546.356	545.348	[M+H]+	C28H52NO7P	5.31489e+07	2.99477e+07	6.97052e+07	1.06158e+08	6.6762e+07	6.20993e+07	6.13528e+07	9.17944e+07	6.76285e+07	8.05866e+07	6.47673e+07	3.5435e+07	4.38471e+07	6.34804e+07	4.48629e+07	6.56606e+07	6.49023e+07	5.90335e+07	4.48912e+07	7.39499e+07	5.59887e+07	5.44003e+07	5.00417e+07	5.35353e+07	6.12211e+07	7.09709e+07	4.82373e+07	8.30636e+07	7.10477e+07	4.78106e+07	5.97536e+07	4.93823e+07	3.90085e+07	5.93181e+07	5.48866e+07	8.14059e+07	4.7704e+07	5.63025e+07	6.16752e+07	5.96894e+07	5.63086e+07	5.42572e+07	5.266e+07
LIPID-P-0386	GP	LPC	544.34	543.332	[M+H]+	C28H50NO7P	4.03915e+06	1.94186e+06	3.08503e+06	4.30144e+06	4.40506e+06	4.34391e+06	3.10459e+06	3.88731e+06	4.46721e+06	3.34804e+06	2.90885e+06	2.38141e+06	2.69991e+06	3.22518e+06	2.87526e+06	3.52951e+06	3.3854e+06	2.63428e+06	2.43657e+06	2.95466e+06	2.29209e+06	3.11263e+06	2.3869e+06	2.85991e+06	2.38116e+06	3.23388e+06	3.27657e+06	3.10533e+06	2.73143e+06	2.96486e+06	2.90415e+06	2.60807e+06	2.78873e+06	2.23972e+06	2.97274e+06	3.21651e+06	2.09319e+06	2.53925e+06	2.83343e+06	2.37694e+06	2.94536e+06	2.62285e+06	2.62572e+06
LIPID-P-0389	GP	LPC	542.325	541.317	[M+H]+	C28H48NO7P	1.42681e+07	1.97573e+07	3.95209e+07	1.02641e+07	7.01109e+06	4.86806e+07	1.02358e+07	4.59121e+06	4.90364e+06	8.69547e+06	1.02494e+07	6.88552e+06	6.8774e+06	1.63513e+07	1.34519e+07	1.66575e+07	1.0386e+07	1.62082e+07	4.22383e+06	9.78633e+06	9.04354e+06	8.34302e+06	5.54402e+06	6.15575e+06	1.04143e+07	1.11378e+07	1.2476e+07	1.38763e+07	1.33124e+07	1.16847e+07	2.88353e+07	1.60807e+07	6.10502e+06	8.42842e+06	6.83628e+06	9.75506e+06	4.30079e+06	5.05612e+06	8.82047e+06	5.04483e+06	2.2771e+07	1.1103e+07	5.60532e+06
LIPID-P-0363	GP	LPC	580.434	579.426	[M+H]+	C30H62NO7P	221893	188182	427970	85718.7	171973	289493	228937	192362	161155	130025	104518	102161	126533	258796	126950	175240	220896	205762	107463	145046	256829	197613	108762	152755	160357	253786	143074	260695	219384	136307	178903	271810	215190	157518	165777	212782	155668	161074	268883	169949	140672	168573	145077
LIPID-P-0376	GP	LPC	578.419	577.411	[M+H]+	C30H60NO7P	317642	231246	469832	147036	193478	313769	228936	179494	232190	156140	150113	115136	125185	168335	173671	140556	195767	187548	130128	125408	198138	166680	126404	125668	153812	176980	178391	222085	190402	155347	223283	147581	202108	191332	179355	192950	147845	171166	158047	158546	156801	165973	168644
LIPID-P-0382	GP	LPC	576.403	575.395	[M+H]+	C30H58NO7P	106070	99199.5	160957	102354	99883.4	141429	105748	104029	122175	89407.2	112052	71517.8	54159.2	120887	79550.1	120854	91050.9	76171	56659.4	102937	172308	145083	55577	84399.9	124989	134022	82514.8	156369	141737	87974.5	119756	129270	149134	91697.2	115486	134193	67573.4	78184.6	116867	111876	77095.6	86652.6	84777.4
LIPID-P-0388	GP	LPC	572.372	571.364	[M+H]+	C30H54NO7P	5.28625e+06	3.49083e+06	4.1795e+06	4.44731e+06	5.63425e+06	5.97636e+06	4.65491e+06	5.84488e+06	5.60327e+06	6.57998e+06	5.30351e+06	3.8114e+06	2.92511e+06	5.08404e+06	4.27573e+06	5.6771e+06	4.60205e+06	3.93304e+06	3.40731e+06	4.91331e+06	3.78195e+06	4.4688e+06	3.50152e+06	4.71457e+06	4.55493e+06	4.05755e+06	3.9976e+06	4.81576e+06	4.06664e+06	3.74971e+06	4.82897e+06	3.79054e+06	4.28921e+06	3.47734e+06	4.28282e+06	5.57379e+06	3.30421e+06	3.59837e+06	4.75994e+06	3.85241e+06	4.60141e+06	4.22871e+06	3.87841e+06
LIPID-P-0391	GP	LPC	570.364	569.348	[M+H]+	C30H52NO7P	4.80247e+06	5.64069e+06	5.1578e+06	1.5957e+06	2.39896e+06	8.66861e+06	2.42245e+06	2.64853e+06	1.81159e+06	2.33143e+06	2.75956e+06	1.12941e+06	1.56291e+06	2.82671e+06	2.79479e+06	5.39909e+06	2.90069e+06	4.30783e+06	1.89289e+06	3.00721e+06	2.9348e+06	3.38955e+06	2.3806e+06	1.85914e+06	1.90565e+06	2.20789e+06	3.56605e+06	2.98551e+06	2.99812e+06	2.63827e+06	3.32337e+06	3.2317e+06	2.82194e+06	2.31875e+06	2.15548e+06	2.18874e+06	2.43115e+06	2.05332e+06	2.43046e+06	1.92086e+06	3.61579e+06	2.17653e+06	1.96216e+06
LIPID-P-0392	GP	LPC	568.34	567.332	[M+H]+	C30H50NO7P	7.36295e+07	3.62896e+07	6.67823e+07	7.31534e+07	7.42541e+07	9.1663e+07	5.92985e+07	6.78637e+07	4.72353e+07	7.16021e+07	5.68742e+07	4.33076e+07	4.32137e+07	6.28234e+07	6.03359e+07	8.19845e+07	5.60749e+07	6.39957e+07	4.89297e+07	7.25626e+07	4.71171e+07	7.34403e+07	4.74015e+07	5.76244e+07	3.52235e+07	5.62534e+07	4.26104e+07	7.31246e+07	5.38996e+07	5.85429e+07	4.86194e+07	5.1244e+07	4.79194e+07	4.68351e+07	5.90753e+07	5.40605e+07	5.20077e+07	5.35006e+07	6.50582e+07	4.43944e+07	6.82693e+07	4.53683e+07	5.50829e+07
LIPID-P-0364	GP	LPC	608.466	607.458	[M+H]+	C32H66NO7P	359981	383737	545328	271215	296854	540792	402392	388749	394084	391514	202916	235299	217985	415187	309693	395529	366645	358820	226271	319619	502668	409145	183633	378844	514133	441921	256194	437565	353731	273409	420887	508449	419511	338199	350502	411762	301735	349921	415587	369573	314474	358587	265118
LIPID-P-0377	GP	LPC	606.45	605.442	[M+H]+	C32H64NO7P	859732	526073	943460	295618	394419	539825	613161	391471	498208	371103	208790	162028	215523	469548	356871	317703	517145	339552	220237	309603	298242	295658	199460	368416	349991	331653	271126	399448	304095	201249	316388	315844	387797	246676	318207	251659	175537	305244	292914	190777	203245	244111	252249
LIPID-P-1930	GP	LPC	604.434	603.426	[M+H]+	C32H62NO7P	216476	114920	197745	98905.4	121553	199858	135395	116374	155412	75517.5	78250	62740	52642.6	143692	81272.7	119817	116594	84200.7	47874.3	96655.1	124214	108246	53329.2	103724	130855	118895	70403.8	114388	121884	78929.5	113448	121964	162373	83958.6	68875	111437	77834.2	68606.5	105074	104597	69733.5	92383.4	87967.3
LIPID-P-0365	GP	LPC	636.497	635.489	[M+H]+	C34H70NO7P	340587	266783	358638	230698	258101	393975	244583	304119	369741	251069	230431	151862	169603	312586	263652	192187	233181	311069	164117	321635	218036	228619	204640	336568	396297	253446	193856	224180	180627	150746	211415	266195	307311	239869	178647	248577	200486	203985	240853	229842	219034	288819	194404
LIPID-P-1927	GP	LPC	634.481	633.473	[M+H]+	C34H68NO7P	146070	156949	241656	265832	357465	213293	152110	362989	486978	293587	211825	183047	236555	503132	131693	284412	154559	277131	198594	277872	350490	321361	207384	410516	461067	265735	226006	331244	270786	251862	270193	301262	136756	241544	109015	204778	125452	230444	283843	214731	217304	210967	214122
LIPID-P-0393	GP	LPC-O	454.33	453.322	[M+H]+	C22H48NO6P	166217	211146	305757	117894	270788	175469	172563	270670	189209	187309	176346	115404	131438	159232	154936	252087	174212	222246	153322	309758	140362	94727.5	157143	251910	166787	149387	235428	206591	244270	200513	177329	180207	164292	161086	163887	123386	100203	104157	119237	163534	152469	119166	116627
LIPID-P-0394	GP	LPC-O	482.361	481.353	[M+H]+	C24H52NO6P	4.27265e+07	4.3393e+07	1.11775e+08	3.17135e+07	6.56284e+07	5.95565e+07	4.54848e+07	5.09553e+07	6.00826e+07	6.94897e+07	5.28897e+07	4.00669e+07	3.07713e+07	6.03937e+07	4.41786e+07	7.40805e+07	5.1066e+07	4.01117e+07	3.74872e+07	9.51996e+07	3.45421e+07	3.79109e+07	3.52726e+07	3.76659e+07	4.6054e+07	3.65058e+07	3.59859e+07	4.71674e+07	6.65237e+07	5.08442e+07	3.20673e+07	2.83366e+07	5.71989e+07	2.94259e+07	3.37503e+07	3.83213e+07	1.91719e+07	2.12801e+07	2.73972e+07	2.72869e+07	2.9539e+07	3.66865e+07	2.6415e+07
LIPID-P-0399	GP	LPC-O	480.345	479.338	[M+H]+	C24H50NO6P	1.66764e+07	1.05581e+07	3.61235e+07	1.03475e+07	1.7542e+07	1.72277e+07	1.69242e+07	1.36655e+07	1.38291e+07	1.65551e+07	1.38451e+07	8.36615e+06	8.92226e+06	1.95009e+07	1.40541e+07	2.26526e+07	1.40925e+07	1.41797e+07	1.12583e+07	1.3202e+07	9.98001e+06	1.05623e+07	9.05083e+06	1.29219e+07	1.18862e+07	1.28532e+07	1.36643e+07	1.3915e+07	1.62268e+07	1.33159e+07	1.07536e+07	1.03412e+07	1.8884e+07	1.1029e+07	1.03012e+07	1.17079e+07	7.30481e+06	8.14856e+06	9.5339e+06	1.35631e+07	8.78252e+06	1.01645e+07	8.92789e+06
LIPID-P-0395	GP	LPC-O	510.392	509.385	[M+H]+	C26H56NO6P	2.67447e+06	2.59367e+06	7.46004e+06	1.32754e+06	2.56212e+06	2.97229e+06	1.71549e+06	1.93111e+06	1.99827e+06	3.76248e+06	2.56812e+06	1.95551e+06	1.39575e+06	3.35826e+06	1.78169e+06	3.18301e+06	2.13969e+06	1.97923e+06	1.28123e+06	7.33129e+06	1.81597e+06	1.84365e+06	1.21257e+06	1.57326e+06	2.03574e+06	1.6669e+06	1.28929e+06	2.31179e+06	3.65481e+06	1.78467e+06	1.23634e+06	1.37819e+06	2.57977e+06	1.15138e+06	1.73777e+06	1.65776e+06	782554	918697	1.27345e+06	875772	1.26488e+06	1.67329e+06	1.2045e+06
LIPID-P-0400	GP	LPC-O	508.377	507.369	[M+H]+	C26H54NO6P	2.30315e+07	2.73688e+07	7.30187e+07	1.69644e+07	2.90771e+07	3.41639e+07	2.50811e+07	2.24886e+07	2.61579e+07	2.97102e+07	2.78436e+07	1.52838e+07	1.62937e+07	3.0672e+07	2.18916e+07	3.36387e+07	2.60439e+07	1.95498e+07	1.68663e+07	3.50455e+07	2.19373e+07	2.27195e+07	1.76421e+07	1.58679e+07	2.31e+07	2.24485e+07	1.76768e+07	3.67625e+07	3.90436e+07	2.99713e+07	2.8454e+07	2.22658e+07	3.20363e+07	2.52257e+07	2.41351e+07	2.17228e+07	1.32132e+07	2.06859e+07	1.73978e+07	1.96184e+07	1.70196e+07	1.9837e+07	1.71041e+07
LIPID-P-0403	GP	LPC-O	506.361	505.353	[M+H]+	C26H52NO6P	443438	451432	934176	410153	553936	552296	399034	454865	566920	408496	585099	357504	211335	650642	350685	793440	455431	280643	204138	1.06406e+06	575022	570525	172841	403986	551158	484648	296634	717417	804674	458866	468299	491660	675951	338565	422864	387778	234371	221035	384243	322639	272191	420430	310310
LIPID-P-0396	GP	LPC-O	538.424	537.416	[M+H]+	C28H60NO6P	330196	360204	1.01349e+06	207860	379254	364125	273499	312582	326547	590270	356774	247283	252251	373870	256672	273737	360026	335587	200193	1.5295e+06	218864	220034	188387	237069	183943	200399	210264	292744	548815	277483	235946	158478	321541	194211	240144	237068	175848	144077	160316	145343	195674	288130	222505
LIPID-P-0401	GP	LPC-O	536.408	535.4	[M+H]+	C28H58NO6P	184364	278193	583375	96856.2	234326	211783	137055	132254	157502	361021	286010	91907	177253	186439	90317.9	212635	199263	143413	114317	981984	130542	104521	81078.8	114756	89210.9	82460.2	81811.7	204002	548361	124856	100229	83392.1	158204	81654.7	128330	91145.3	52056.9	84984.7	65878.6	60318.4	78243.3	160267	107623
LIPID-P-0404	GP	LPC-O	534.392	533.385	[M+H]+	C28H56NO6P	620426	610116	1.63752e+06	392030	1.04375e+06	663009	424013	506038	526204	907418	1.06034e+06	355519	410829	773187	381671	1.22275e+06	709517	478221	259056	4.11929e+06	416816	362709	176326	512941	385102	310707	239007	856295	1.68746e+06	395276	340430	405396	615458	279064	362667	313477	189614	207668	225616	247644	244511	877741	413840
LIPID-P-0406	GP	LPC-O	532.377	531.369	[M+H]+	C28H54NO6P	75935.5	111863	144217	65668.6	126834	73528.3	69793.7	80106.7	90695	96314.9	206935	72794.2	57329	127112	68519.5	143770	112579	67308.2	42534.8	488667	86777.2	68935.8	42481.5	81888.2	82306.5	61020	42119.5	99012.5	226428	78017.6	79440.5	76293.1	93110.2	41332.8	50626.3	35093.6	42977.4	36550.1	35243.5	40545.3	35831.4	96936.5	57212.5
LIPID-P-0397	GP	LPC-O	566.455	565.447	[M+H]+	C30H64NO6P	330922	325524	862702	202442	396350	416394	313128	397953	372823	515176	249304	218180	289220	416679	305143	291524	384437	380110	253837	778864	263621	245993	292650	357867	249644	280603	293375	313542	382369	325187	319554	224664	361864	277632	306367	302424	252691	240263	258492	246906	266573	293907	286725
LIPID-P-0405	GP	LPC-O	562.424	561.416	[M+H]+	C30H60NO6P	197461	191351	477194	105273	346555	191839	142558	169881	184979	266832	325758	87329.8	153548	209493	106194	297229	241263	156755	94410.1	1.48673e+06	130897	103194	70302.9	157443	98869.2	100895	91112.3	267444	554737	138334	129505	116374	148548	87684.6	101577	101422	77394.8	69037.8	81298.4	83608.8	74035.1	264606	148372
LIPID-P-1937	GP	LPC-O	594.486	593.478	[M+H]+	C32H68NO6P	406324	433532	725509	232405	426304	508324	539605	463397	394436	763625	413618	410083	528108	504194	491013	364465	592817	490890	394367	761182	439159	379032	455676	390193	407055	418745	398659	488197	384581	530130	464738	326332	506732	408471	459594	421630	405085	516947	389455	357014	388992	500692	418313
LIPID-P-1936	GP	LPC-O	592.471	591.463	[M+H]+	C32H66NO6P	576578	428891	1.20922e+06	231878	539263	594324	489320	386863	431197	651088	370908	226973	413925	559485	293406	316092	573352	376081	340135	1.06704e+06	288324	296359	361778	351081	307451	297938	331106	399029	454250	414345	388310	208994	400648	303577	410549	305385	264204	464162	297456	215536	253035	316052	463196
LIPID-P-0407	GP	LPE	454.293	453.286	[M+H]+	C21H44NO7P	1.24473e+06	866547	2.36777e+06	1.36693e+06	1.17727e+06	2.35107e+06	1.71875e+06	1.53184e+06	1.08207e+06	991763	1.45141e+06	1.6453e+06	772794	1.75973e+06	1.02544e+06	1.94225e+06	1.22547e+06	1.32766e+06	860879	1.24691e+06	1.39667e+06	1.48468e+06	647714	1.44616e+06	1.03012e+06	1.39727e+06	1.18083e+06	1.78919e+06	1.59392e+06	1.04969e+06	1.0024e+06	1.59329e+06	1.35673e+06	1.25478e+06	1.29489e+06	1.70583e+06	975165	684175	1.35747e+06	944140	1.48088e+06	1.14216e+06	1.239e+06
LIPID-P-0410	GP	LPE	482.325	481.317	[M+H]+	C23H48NO7P	1.16694e+06	1.015e+06	2.35987e+06	1.08089e+06	1.08217e+06	2.86052e+06	1.64183e+06	1.15099e+06	619818	766400	1.6368e+06	1.52769e+06	739701	1.48622e+06	883878	1.77265e+06	1.07264e+06	1.0523e+06	696718	1.01653e+06	1.60364e+06	1.89078e+06	510535	1.15622e+06	1.08008e+06	1.60706e+06	1.0953e+06	1.77337e+06	1.5423e+06	829543	722850	1.58282e+06	1.41992e+06	880361	1.44077e+06	1.62132e+06	767660	666336	1.2193e+06	730045	1.48281e+06	893236	1.13863e+06
LIPID-P-0417	GP	LPE	480.309	479.301	[M+H]+	C23H46NO7P	1.7807e+06	939145	4.55146e+06	1.10274e+06	1.62615e+06	2.69085e+06	1.89933e+06	1.47855e+06	725740	1.19877e+06	1.7515e+06	1.82828e+06	1.29124e+06	1.8485e+06	1.53914e+06	1.93944e+06	2.15657e+06	1.72934e+06	975851	685733	2.6263e+06	2.57391e+06	1.02024e+06	1.10542e+06	1.19384e+06	3.26346e+06	1.57815e+06	3.46032e+06	2.84368e+06	1.87707e+06	2.5448e+06	3.29075e+06	1.71169e+06	3.67045e+06	3.04911e+06	3.76599e+06	2.77975e+06	3.04353e+06	2.85869e+06	3.11847e+06	3.01027e+06	2.95489e+06	3.7028e+06
LIPID-P-0423	GP	LPE	478.293	477.286	[M+H]+	C23H44NO7P	1.7404e+06	841307	3.66151e+06	1.21388e+06	1.53019e+06	2.09492e+06	2.25388e+06	1.3733e+06	627616	1.21107e+06	2.03922e+06	1.31189e+06	1.30906e+06	2.02085e+06	1.76435e+06	2.07634e+06	2.22356e+06	1.7354e+06	822186	851952	3.3632e+06	2.89633e+06	843201	1.1172e+06	1.26522e+06	3.87699e+06	1.9292e+06	3.91426e+06	2.96966e+06	2.19954e+06	2.64383e+06	3.29685e+06	1.97886e+06	3.01318e+06	3.364e+06	4.06445e+06	2.74791e+06	2.73702e+06	3.13355e+06	2.92895e+06	3.72754e+06	3.16293e+06	3.50318e+06
LIPID-P-0419	GP	LPE	508.34	507.332	[M+H]+	C25H50NO7P	23472.7	15642.6	71926.3	26882	24322.9	32642	40928.1	21038	12396	20675.7	29406.4	24868.1	18819.8	23339.3	28231.7	21097.9	23986.8	25294.4	20824.4	16524.2	44771.6	36649.3	13340.5	15580.8	20128.1	40501.5	24021.6	60609.7	31582.2	29997.8	35750.5	44912.2	27054.1	55244.1	42048.9	46600.2	30724.7	42535.2	29716	31995.4	38053	31129.4	52519.1
LIPID-P-0429	GP	LPE	504.309	503.301	[M+H]+	C25H46NO7P	103635	31255.3	175355	191787	120337	120996	205924	190971	91652.1	143700	155766	145007	99166.4	129695	118467	139977	177344	144729	102237	138223	201121	129952	104005	113393	178577	224053	113715	272162	177986	121569	181135	184944	91859.4	198818	150526	255652	158674	164835	190907	165220	165887	171893	147317
LIPID-P-0408	GP	LPE	454.293	453.286	[M+H]+	C21H44NO7P	1.19441e+06	883024	2.33615e+06	1.35306e+06	1.22175e+06	2.35989e+06	1.74484e+06	1.57919e+06	1.062e+06	1.02165e+06	1.4248e+06	1.64828e+06	758512	1.7904e+06	1.02776e+06	1.93301e+06	1.2202e+06	1.2923e+06	915937	1.31538e+06	1.38781e+06	1.42113e+06	629562	1.46044e+06	1.05581e+06	1.4267e+06	1.18223e+06	1.85047e+06	1.57807e+06	1.0219e+06	985886	1.6247e+06	1.35461e+06	1.25262e+06	1.3235e+06	1.68003e+06	1.01167e+06	689842	1.2831e+06	1.02844e+06	1.48212e+06	1.09745e+06	1.23584e+06
LIPID-P-0415	GP	LPE	452.278	451.27	[M+H]+	C21H42NO7P	99441	47963.1	154381	325897	158429	194395	197642	241758	197941	370904	219871	640470	144931	276094	160040	271680	247361	131610	116087	199138	123553	112703	66758.1	172380	265672	196691	100565	246566	185811	125820	175587	129639	98754.7	164877	135833	388977	73882.8	106777	164556	112821	143627	161370	70526.2
LIPID-P-0409	GP	LPE	468.305	467.301	[M+H]+	C22H46NO7P	25593.7	18422.4	47824.2	31498.9	30731.9	47095.1	32714.9	37480.8	29293.9	15162.8	37344.1	46291	15932.9	36221.9	21242.7	35208.2	29982.9	37089.2	15690.1	24661.2	39247.4	41303.2	20255	42167	21898.3	36770.3	31417.8	53850.9	35451.8	19610.3	24405.1	39104.8	35039.8	28720.4	30819.6	39921.4	25016.2	17901.6	25534.2	27706.3	37254.4	29701.5	37234.7
LIPID-P-0411	GP	LPE	482.325	481.317	[M+H]+	C23H48NO7P	1.1181e+06	990785	2.3902e+06	1.10116e+06	1.08832e+06	2.7714e+06	1.54169e+06	1.10262e+06	616953	787379	1.5992e+06	1.45084e+06	716635	1.54269e+06	857648	1.75112e+06	1.05226e+06	1.05582e+06	674885	1.04723e+06	1.59678e+06	1.92019e+06	491105	1.18708e+06	1.08055e+06	1.61676e+06	1.09618e+06	1.75086e+06	1.58957e+06	824478	723785	1.55875e+06	1.4101e+06	847636	1.41885e+06	1.60427e+06	752923	646390	1.19628e+06	708594	1.43644e+06	872652	1.14254e+06
LIPID-P-0418	GP	LPE	480.309	479.301	[M+H]+	C23H46NO7P	1.79683e+06	966859	4.70098e+06	1.15249e+06	1.64488e+06	2.69682e+06	1.85947e+06	1.47661e+06	728362	1.19224e+06	1.75854e+06	1.77789e+06	1.32906e+06	1.9061e+06	1.54513e+06	1.93105e+06	2.2891e+06	1.72976e+06	958971	677448	2.60221e+06	2.64588e+06	1.0219e+06	1.11695e+06	1.18729e+06	3.39432e+06	1.51392e+06	3.46289e+06	2.7852e+06	1.87428e+06	2.51752e+06	3.20989e+06	1.67243e+06	3.61388e+06	3.06739e+06	3.72895e+06	2.78513e+06	3.05864e+06	2.92742e+06	3.16784e+06	2.99116e+06	3.01471e+06	3.73701e+06
LIPID-P-0424	GP	LPE	478.293	477.286	[M+H]+	C23H44NO7P	1.72944e+06	855431	3.57501e+06	1.2109e+06	1.63761e+06	2.15432e+06	2.27015e+06	1.45221e+06	651508	1.18134e+06	2.01904e+06	1.30128e+06	1.36071e+06	2.06149e+06	1.70881e+06	2.02472e+06	2.29511e+06	1.74204e+06	843507	826744	3.35408e+06	2.95803e+06	819771	1.11385e+06	1.35366e+06	3.92895e+06	1.933e+06	3.96703e+06	3.00092e+06	2.23857e+06	2.69628e+06	3.28585e+06	1.99826e+06	3.09017e+06	3.33049e+06	4.09679e+06	2.74157e+06	2.71396e+06	3.1781e+06	3.01866e+06	3.84218e+06	3.28636e+06	3.59824e+06
LIPID-P-0428	GP	LPE	476.278	475.27	[M+H]+	C23H42NO7P	42056.2	17829.2	112329	32118.7	32018.4	48362.7	33396.9	24017.1	16200.5	25209.6	57113.2	35743.2	30253.6	62270.7	48360.5	61007.3	47100.8	40117.1	14401.8	4116.8	89629.3	98895	12727.2	35962.9	52460.2	110837	62151.5	99973.9	71078	99149.4	147417	136483	53317.6	83275.4	75765	94750.8	49276.7	44878.1	81870.9	51900.4	153708	54982	110473
LIPID-P-0412	GP	LPE	510.356	509.348	[M+H]+	C25H52NO7P	8384.77	9104.53	21626	10171.4	9296.5	12593.8	8228.23	7995.31	6003.24	5205.79	15221.6	20146.8	5088.21	3805.49	7605.12	8359.05	6858.24	8866.08	6278.59	7352.26	13238.3	16021.9	4411.68	8263.96	7572.54	11360.3	8369.42	13442.6	12185.2	8294.36	5495.57	5732.65	9788.08	12214.4	11137.6	9457.38	11127.9	6293.14	10598.7	8319.92	14496.4	9174.7	18072.9
LIPID-P-0420	GP	LPE	508.34	507.332	[M+H]+	C25H50NO7P	20518.4	15672.6	65320.6	25142.5	22296	34848.5	39934.5	24195.1	14419.6	20978.9	29688.5	26548	17458	18766.6	28415.4	22036.9	31489.5	26185	21173.1	14924.5	46760.2	37257.4	16231.9	14148.8	21111.9	48908.7	23572.9	61872.2	33617.3	29034	34703.2	45142.3	27841.3	55304.1	45148.6	49003.6	32182.7	40499.8	33151.1	32699.3	42127.9	32319	54122.2
LIPID-P-0430	GP	LPE	504.309	531.332	[M+H]+	C27H50NO7P	111480	54499.9	197673	203404	117715	134446	209127	201408	89283.1	140720	164060	133316	115142	133439	118981	142276	179174	133014	113222	150410	196049	141556	111144	121573	181788	220556	107535	254430	181377	110611	181936	194865	104779	206001	152184	255268	160573	170039	178641	171864	173083	193880	162713
LIPID-P-0432	GP	LPE	502.293	501.286	[M+H]+	C25H44NO7P	1.03284e+06	382936	1.35256e+06	1.61188e+06	1.27026e+06	1.26821e+06	1.35226e+06	1.28351e+06	824795	1.11393e+06	1.18364e+06	1.33535e+06	1.07965e+06	1.08399e+06	1.17852e+06	1.20658e+06	1.30741e+06	1.14693e+06	811556	823705	1.12606e+06	996883	756176	897628	994113	1.65196e+06	1.12734e+06	1.44388e+06	1.11058e+06	1.01629e+06	1.39416e+06	1.34155e+06	876544	1.05088e+06	1.33327e+06	1.8452e+06	1.09274e+06	1.09765e+06	1.15339e+06	1.0055e+06	1.47503e+06	1.35394e+06	1.20491e+06
LIPID-P-0434	GP	LPE	500.278	499.27	[M+H]+	C25H42NO7P	29040.2	26759.4	90946.3	26821.6	10322.2	84198.6	29571.8	7897.46	7549.62	22510.9	25090.3	27474.8	21421.5	35131.9	43666	26791.2	22510.9	40433.8	9083.61	23499.5	31246.4	16105.1	5489.21	14064.4	49078	42442.1	26848.6	38900	29378.6	46501.7	137432	56632.2	11842.5	28288.5	20430.6	33995.7	13081.3	18534.4	25965.8	15388.6	78609.5	37410.7	17561.7
LIPID-P-0437	GP	LPE	526.293	525.286	[M+H]+	C27H44NO7P	857159	428929	1.16044e+06	1.28159e+06	1.09086e+06	1.28639e+06	1.22494e+06	1.15179e+06	688855	1.06382e+06	1.05346e+06	950087	711886	882447	1.33324e+06	1.22341e+06	1.19591e+06	1.13687e+06	927620	978405	1.01271e+06	935831	778595	931688	674159	1.20051e+06	700409	1.23097e+06	1.0015e+06	1.11421e+06	1.25479e+06	1.24618e+06	744751	1.06905e+06	1.0595e+06	1.1317e+06	1.19054e+06	1.06769e+06	1.29324e+06	844589	1.49349e+06	1.08262e+06	1.10547e+06
LIPID-P-0414	GP	LPE	566.419	565.411	[M+H]+	C29H60NO7P	22249.1	31150.9	17769.7	43692.7	32421.7	28244.6	31990.2	25079.1	21024.4	14772.2	28727.1	33609.2	33138.6	16811.2	31729.4	36901	34436	32369.4	29883.5	16821.8	36889.7	33879.2	26314.5	27206.3	40212.3	22537.9	21272.4	24602.3	39139.4	18860.4	31571.1	31980.5	27489.6	43454.7	40023.7	34330.6	27201.2	32087	22022	34533	17233	27061.6	16073.5
LIPID-P-0438	GP	LPE-P	438.3	437.291	[M+H]+	C21H44NO6P	1.26266e+06	658112	3.12568e+06	1.61835e+06	1.24928e+06	1.48917e+06	1.05688e+06	988639	1.33571e+06	1.40569e+06	2.57567e+06	2.50567e+06	892355	1.19973e+06	1.02223e+06	1.57446e+06	1.21413e+06	1.38257e+06	694464	2.67674e+06	975688	1.1376e+06	673810	791351	762848	790066	711282	1.54566e+06	1.65574e+06	781892	724043	844218	1.01044e+06	921846	1.36998e+06	1.02686e+06	712535	619295	587632	1.06639e+06	967070	1.34801e+06	1.1782e+06
LIPID-P-0439	GP	LPE-P	452.31	451.306	[M+H]+	C22H46NO6P	28724.1	10533	46343.9	16703.9	14881	21969.7	14142.1	18993.8	13874.4	12288.2	27083	19377	9455.96	17823.4	17656.9	19392.7	17754.6	19198	11144.2	35757.8	17025.2	15963.3	7440.24	14827.7	11601.6	17243.8	10689.7	25502	20406.5	19585.2	13742.7	20223.4	16466	12463.1	21429.4	13526	9451.99	12119.4	13201.7	12261.6	15106	16590.8	19994.1
LIPID-P-0440	GP	LPE-P	466.3	465.322	[M+H]+	C23H48NO6P	557058	354665	1.23979e+06	460100	437923	630310	416516	384709	369360	489030	781311	697305	327088	463854	435941	533965	444834	503508	272999	1.30361e+06	507089	504657	245225	359990	320324	387547	321212	657644	694684	405320	356832	436417	399264	349868	549580	384839	276473	246778	295119	292664	446575	495144	440580
LIPID-P-0445	GP	LPE-P	464.3	463.306	[M+H]+	C23H46NO6P	299609	164537	1.15123e+06	288624	284369	284929	240497	234044	215295	309082	525336	332597	220832	268475	290777	266210	372202	295312	131457	568973	269397	283187	177842	157979	167735	234848	140921	545480	475099	212980	256661	315002	286498	306529	401685	219674	167664	188378	125923	276593	265277	314478	414872
LIPID-P-0441	GP	LPE-P	494.3	493.353	[M+H]+	C25H52NO6P	43724.2	26754.1	124253	36221.7	41730.5	46568.7	48594.8	28072.5	37143.9	31590.7	50343.8	41111.5	30524.8	30886.7	43468.1	32903.6	43062.2	47576.8	26400.8	130438	37013	43464	27687.4	31036.7	19203.8	29667.2	33270.2	56356.2	57575.4	40569.6	37845.6	31954.5	35578.7	24657.2	41700.7	30138.5	31583.2	28979.7	22001	24510.6	24549	46713.8	43158
LIPID-P-0442	GP	LPE-P	522.389	521.385	[M+H]+	C27H56NO6P	422112	725801	1.47016e+06	29651.4	27436.4	2.54596e+06	22447.5	29591.8	26301.8	1.29741e+06	2.22164e+06	3.24147e+06	25518.9	2.90217e+06	24110.5	3.49941e+06	36173.8	17212.5	19624.6	55475.4	2.50248e+06	4.66821e+06	11566.9	2.42143e+06	1.94898e+06	2.10254e+06	908542	2.89224e+06	2.58456e+06	31128.8	22005.7	3.08961e+06	2.57903e+06	23766.1	1.78127e+06	2.20719e+06	43314.3	25400.5	2.83248e+06	24768.8	1.5672e+06	21609.4	25740.8
LIPID-N-0166	GP	LPG	483.272	484.28	[M-H]-	C22H45O9P	40593.1	90104.4	59768.2	97701.8	83559.4	84729.6	78424.5	129489	76794.5	62826.8	94170.4	52239.3	56035.7	54598.7	68997.5	83688.7	93657.2	78503.4	71159.5	97511.1	68142.4	45221.7	49960.6	76161.8	42985.2	40547.8	69795.7	57023.7	64261.6	52015.2	76704.3	65822.1	45015.3	51527.9	58575.5	116648	66547.5	69511.7	68170.5	85864	88625.1	73889.9	80170.6
LIPID-N-0167	GP	LPG	511.304	512.311	[M-H]-	C24H49O9P	14333	20999.8	25450	20330.4	34434.8	30472	24360.2	31975.9	26118.9	17467	20594.6	25434.7	24623.2	34409.3	21905.8	24196.2	38782	38305.7	17413.7	22639.4	22617	18004.8	16486.9	21534.2	18642.8	22334.5	24963.7	17288.6	22220.1	18715	15341.7	18611.1	15141.1	15752.7	20652.9	27438.3	18299	17307.3	17648.7	17754.1	22785.4	18042.4	24931.8
LIPID-N-0170	GP	LPG	509.288	510.296	[M-H]-	C24H47O9P	361509	368699	1.03223e+06	294808	498254	713244	481682	496417	389919	286170	325777	352526	356915	408994	347715	522635	430285	381741	409577	254000	373044	325111	265378	284808	282453	414023	349652	516858	469274	447699	355786	397598	291300	335845	447142	515804	423076	452758	341929	330717	405032	412067	433946
LIPID-N-0171	GP	LPG	507.272	508.28	[M-H]-	C24H45O9P	127230	132867	158371	83394.3	109151	169939	103465	115571	132721	57340.8	127573	108495	84253.6	230296	93778.2	173803	127790	119209	57172.5	65103.6	183751	190095	68364.5	108791	138524	199568	129858	155756	154029	138120	128912	177092	138846	111395	220295	247615	135706	163138	185138	160742	190841	119957	125576
LIPID-N-0172	GP	LPG	531.27	532.28	[M-H]-	C26H45O9P	22849.2	23546.1	16362.2	20334.7	50701.9	24815	34113.2	43068.7	82409.7	25122.2	19489.6	37809.4	19921	31401.3	19702.7	26378	19865.9	21356.9	15418	32269.8	20738.8	22342.6	22532	23003.7	19377.5	26400.5	28970	20337.6	36031.2	32788.3	28429.7	25249.2	22466.8	20284.1	31871.8	40115.2	21278.1	27589.1	20005.2	29480.5	32430.1	21932	18610.2
LIPID-N-0668	GP	LPG	559.304	560.311	[M-H]-	C28H49O9P	6705.2	4320.26	7603.9	5789.3	11721.4	11717.5	9458.37	12031.4	15584.5	8299.54	6380.86	8067.77	3608.59	6795.91	5515.01	11505.7	6092.85	4708.86	3665.17	8506.55	5247.43	7091.4	4685.64	7041.5	6445.64	6458.94	7163.84	7667.36	9056.32	6714.94	6849.63	5462.36	4830.83	4542.73	8239.81	7288.68	2497.52	6591.97	4859.66	6015.54	6216.53	6364.22	4799.19
LIPID-N-0175	GP	LPI	571.288	572.296	[M-H]-	C25H49O12P	225581	168011	546642	66644.7	80678.8	149728	130827	93886.4	96165.5	46964.7	38773.2	75941.8	42252.9	110079	74512.4	76457.7	78183.4	39058.3	56169	58272.1	56730.9	54229	52077.7	70176.9	85512.6	53718.7	43896.2	71151.9	48183.6	66320.9	34944.3	68690.2	101473	62788.8	84196.3	44505.6	27748	22853	32207.6	31053.5	50710.9	36210.8	77614.5
LIPID-N-0177	GP	LPI	569.273	570.281	[M-H]-	C25H47O12P	8991.04	10353.5	11259.4	15374.3	11017.9	13957.8	18929.5	12671	14819.2	17905.8	12255.6	31647.2	5114.61	10619.8	12122	18343.6	11313.4	4030.3	12592.4	16710.6	10205.2	8409.1	4424.95	11839.1	10112.5	9744.01	6202.75	11607.6	10407.2	10567.2	8268.48	10822.5	6279.96	7610.13	8047.3	18532.8	5439	6908.19	6304.21	9115.62	7193.73	7718.46	6235.15
LIPID-N-0176	GP	LPI	599.32	600.327	[M-H]-	C27H53O12P	707963	533173	1.70806e+06	240576	230161	531823	331726	226270	217857	110797	133108	237745	153337	410036	230351	244203	268091	153558	151160	151398	214191	164671	150704	198486	214466	165491	129148	207924	145551	159775	120075	145247	377431	167927	305538	137473	82287.7	81232.4	89063	116729	148317	129672	184956
LIPID-N-0178	GP	LPI	597.304	598.312	[M-H]-	C27H51O12P	168623	162593	767167	68113.1	101523	123509	162292	83039.7	80178.9	50865.2	46967.4	102773	48398.3	135546	108278	97534.2	100766	46919.3	48373.6	57705.1	157699	90245.5	63039.9	65160.1	115991	110100	56421.8	179195	84338.3	100628	96261.1	162446	148150	185553	131550	102290	96467.4	87382.9	76760.4	97446.7	96198.1	92645.1	206453
LIPID-N-0179	GP	LPI	595.288	596.296	[M-H]-	C27H49O12P	88250.3	76797	105602	25137.7	49190.6	66546.8	71091.6	40288.7	26155.2	19143.3	54051.8	36583.2	28435	48779.6	50241.5	54217.9	62428.9	23570.2	27721	25173.7	97160.9	120377	21017.2	42198.9	34386.4	124511	42193.2	158852	88571.5	90665.5	74568.5	167398	92617.7	87171.3	113748	98788.5	78874.4	59052.2	84875.8	85914.6	71518.7	70320.9	144537
LIPID-N-0180	GP	LPI	621.304	622.312	[M-H]-	C29H51O12P	51315.6	51714.9	75481.4	91340.5	74460.5	66867.6	72100.2	62405.9	61926.6	42849.7	62356.5	47560	28042.1	59657.6	46668.8	83297	58094.5	28640.1	35777	90491.3	44660.4	63030.6	32323.3	56173.2	46872.6	85659.5	39917.2	149001	60135.7	58350.5	52078.6	54556.6	42725.5	76285.1	93593.4	120878	54494.9	52034.4	52402.8	63062.3	57924.8	56674.4	59414.6
LIPID-N-0181	GP	LPI	619.288	620.296	[M-H]-	C29H49O12P	142676	105724	144476	182210	173029	149709	172925	136419	137301	90639.4	121848	144732	73751.4	136293	119276	156099	125897	69641.3	90495.8	145206	110324	156844	75963.8	123931	95239.5	192223	127128	204461	143495	172439	154195	218632	160355	139261	235052	235216	117614	140406	119244	125578	142866	143928	189565
LIPID-N-0187	GP	LPS	524.299	525.307	[M-H]-	C24H48NO9P	27850	43050.9	30155.1	34846.6	28491.2	22391.7	21769.2	20582.6	81076.9	17678.4	42032.1	139558	17051.8	12272.9	12733.1	22700.5	11086.3	12032.4	14551.9	23090	14566.9	26968.4	5229.06	13841.8	41379.8	21386.6	11052.1	16862.6	6405.82	45781.8	15543	7363.43	29151.4	29527.6	25538.6	26575.3	16355.7	15516.4	8575.55	25495.8	58233.9	6199.09	19106.1
LIPID-N-0192	GP	LPS	522.283	523.291	[M-H]-	C24H46NO9P	32608.8	34891	30225.8	31994.9	34049.4	29105.6	29142.1	30688.1	34440.8	13950.9	34274.2	37950.2	27878.5	16663.3	24177.4	34934	28843.4	16889.3	23433.4	22579.6	31718.4	22834.8	10805.1	26062.4	29945.1	30584.6	27906.9	29653	12466.8	30242.8	23036.6	26308.1	29060.3	26541	32556.8	21740.2	27659.2	26818.9	15790.8	23707.3	30922	19735.7	28978.3
LIPID-P-0274	GL	MG	348.321	330.277	[M+NH4]+	C19H38O4	796258	885570	817297	792158	815393	768274	724492	789812	867898	838662	760370	733563	807305	785250	768018	751106	736219	717293	751317	723881	828749	734628	721029	764439	815921	839442	760104	781711	722524	786033	804568	656672	882156	854452	716909	691983	814079	756040	779357	713057	722217	763349	698406
LIPID-P-0275	GL	MG	362.321	344.293	[M+NH4]+	C20H40O4	3563.12	4608.29	3104.33	4443.1	3976.32	4602.6	3683.1	4329.19	5522.11	3488.51	3537.82	3566.38	4698.23	4301.9	4335.81	5021.44	3104.53	5476.11	3436.26	3914.1	3486.13	4213.85	3876.63	2899.68	3699.15	4231.74	3309.24	2657.07	4248.9	3830.17	3843.4	3039.33	2964.26	4248.04	4017.85	3696.56	2835.28	4054.67	3067.62	4854.92	3622.12	3271.25	2470.44
LIPID-P-0276	GL	MG	376.352	358.308	[M+NH4]+	C21H42O4	863633	968266	949802	917508	910859	973784	858991	913419	932016	1.04975e+06	845514	958570	911862	932042	926062	853768	877600	888405	879472	915576	911209	927536	865831	919410	907130	956676	857930	978100	913725	923206	941006	836082	1.01698e+06	997183	1.04024e+06	807173	947726	988612	835501	933262	823289	879477	900173
LIPID-P-0282	GL	MG	374.336	356.293	[M+NH4]+	C21H40O4	28066.9	32316.5	56102.5	14851.1	17151.9	33519.5	17375.9	15676.8	1752.16	9532.08	7165.99	4279.9	12740.1	34579.7	32887.6	37093.7	15636.4	7901.79	13404.2	6766.42	47661.3	29009.5	11585.4	7254.18	14071	30310.8	4106.5	25668.2	22470.2	11401.9	10218.2	34436.3	27932.6	7717.6	62613.6	28126.9	5029.89	18546	20778.3	12623.5	18608.3	13737.6	32116.2
LIPID-P-0283	GL	MG	372.31	354.277	[M+NH4]+	C21H38O4	10661.2	18280.3	18352.3	3067.85	103.743	103.743	103.743	103.743	103.743	103.743	103.743	1871.88	103.743	21484.4	8192.05	21198.3	103.743	103.743	103.743	103.743	36857.4	22422.8	103.743	8284.04	8394.16	22120.8	103.743	16938.2	103.743	103.743	103.743	22132.9	17610.1	103.743	103.743	14864.2	2528.33	103.743	103.743	5246.19	103.743	103.743	13889.6
LIPID-N-1477	GP	PA	611.371	612.379	[M-H]-	C33H57O8P	13789.7	13352.4	12928.4	11775.5	13905.5	12963.1	11715.8	9374.4	9988.36	8056.5	11126.4	10026.9	10043.8	8898.92	11125.3	11528.9	12684.5	11358	9506.42	13844.6	10790.8	10034.6	9215.25	8585.17	8352.06	12928.4	8411.87	8934.9	10677.5	8929.53	9505.3	11658.5	11293.5	9919.67	13748	10496.2	9356.74	13688.6	10142.7	9676.35	11415.3	8464.23	11010.7
LIPID-N-1444	GP	PA	535.34	536.348	[M-H]-	C27H53O8P	20292.7	56053.1	24850.3	12634	18589.7	24945.9	14299.8	16960.3	24925.9	8132.73	12466.1	15528.6	14325.5	9976.63	11924.1	15271.3	12600.4	12396.7	12369.6	11717.4	12837.1	11684.4	3285.07	13788	11209.6	13924.2	11006.5	12024.5	7022.27	15675.4	5937.12	13313.7	31044	8638.72	12974.7	9984.99	10329.6	12385.2	4656.81	11513.7	15138.1	8199.23	15054.1
LIPID-N-1478	GP	PA	611.371	612.379	[M-H]-	C33H57O8P	604601	579443	541644	612215	526561	522023	470268	474616	483126	362526	505084	462928	467954	492332	579404	513016	534321	520693	545742	572283	488275	509082	422799	433975	416315	507057	410054	482445	457683	460461	417414	475354	493927	507906	562781	437944	422425	664518	422467	451921	482922	449300	514834
LIPID-N-1490	GP	PA	637.387	638.395	[M-H]-	C35H59O8P	57120.8	17527.5	16552.6	33109.1	12973.4	14913.7	14537	15154	15977.7	22470.7	33090.9	13875.3	14234.8	37771.6	13248.3	33941.1	30603	12988	13119.1	33755.7	34185.6	11170	13983.4	12615.8	13598.3	11995.5	11626.4	30896.6	30516.4	35824.6	30397	33377.2	15341	12186.8	32354.6	12988.7	13894.9	15094.4	32499.3	35654.7	34778.6	33155.1	29695.1
LIPID-N-1479	GP	PA	667.434	668.442	[M-H]-	C37H65O8P	27128.7	39448.7	29150.8	39696.2	34496.2	31917.6	28368.9	29041.4	24875.7	22499.1	30809.3	26626.1	26654.6	26713.3	36860.1	38097.2	34774.6	32390	31920.1	38038.8	28581.8	32310.6	22907.6	28591.9	23884.7	31844.4	24106.3	29427.6	23876.3	30970	21132.3	27828.5	27766.8	31511.2	30687	28134.2	23667.6	37967.6	26545.1	26634	29901.4	24491	36175
LIPID-N-1499	GP	PA	663.403	664.41	[M-H]-	C37H61O8P	133177	79593.7	115637	81410.7	65382.5	98297.2	81708.2	93945.2	100189	72329.2	76806.7	94670	90660.2	97322.5	85337.1	94445.6	93744.5	93176.7	85911.2	84649.6	105384	91861.5	88126	84675.7	78365.4	85683.2	83380.5	84923.2	94749.9	83830.7	87041.4	94582.5	92797.5	87572.5	89340.1	76183.9	77293.4	76224.5	80922	80196.7	77832.3	76939.2	76687.1
LIPID-N-1446	GP	PA	703.528	704.536	[M-H]-	C39H77O8P	75836.9	85273.7	73587.7	74283.5	85458.7	59185.1	56325.8	53362.7	88194.7	117695	90423.2	46301.4	40895.6	96935.8	107641	116545	91804.9	85757.2	75379.4	71617.1	54933.4	73407.4	57567.2	117048	128138	100294	83058.6	63268.6	113014	103978	92128.7	82848.1	84515.3	67266.2	60300.8	120451	62241.7	102292	66371.2	127118	60018.9	95107.7	59924.9
LIPID-N-1455	GP	PA	701.512	702.52	[M-H]-	C39H75O8P	20051	15550.8	54722.2	11549.3	25395.4	10211.8	39778.7	23954.7	16423.1	8292.09	9294.76	4611.11	32808.3	9585.55	48081.1	10212.7	52149.3	21196.6	29478.3	15957.7	67396.1	73935.3	19013.6	14516.5	21772.1	67983.5	21190.6	72874.4	58147.3	57523.3	109387	121740	32796.6	112930	68558.1	45176.3	80189	95327.4	54479.9	104921	32797.7	67489.2	89393.5
LIPID-N-1462	GP	PA	699.496	700.504	[M-H]-	C39H73O8P	11922.6	22556.3	20010.4	16211.6	19161.8	34053.4	27210.9	17028	20862	28936.6	22997.8	26810.9	14053.5	34467.7	24281.1	30243.4	11500.9	23431.1	13639.4	20004.2	34896.7	29796.9	21281.9	20003.3	31407.9	30647.4	21716.9	34051.7	29800.7	26340.1	30213.1	26764.5	22981.4	29363.9	35779	38329	26391.4	28949.3	27665.1	24711.4	20431.6	18727.9	39616.3
LIPID-N-1447	GP	PA	731.559	732.567	[M-H]-	C41H81O8P	69505	119681	135739	72878.6	84268	95299.2	78750.7	53602.1	74657.9	112750	130519	56023.8	76309.1	132486	149127	96082	138026	77771.2	96970.1	58766.8	108232	107473	129257	85496.1	154938	112631	91358.5	154351	127211	147113	210257	146789	106132	164379	132483	118177	101438	225704	106773	127223	116442	123855	118004
LIPID-N-1470	GP	PA	725.512	726.52	[M-H]-	C41H75O8P	9992.01	10795.1	20077.3	13977.7	27290.6	10412	23476.3	38143.8	19226.9	21405	44314.2	19042.1	26657.2	13508.6	25606.7	30327	28193.5	27260.3	30813.6	36118.8	49748	38983.9	25826.3	32277.1	20987.6	34564.9	33158.4	48872.1	58408.8	46359.4	34624.3	34760.3	9183.16	37265.7	44228.1	43719.6	59927.8	34042.1	45674.6	55865.2	31924.2	31718.2	48915.5
LIPID-N-1484	GP	PA	751.528	752.536	[M-H]-	C43H77O8P	33379.8	33500.4	30961.2	84883.6	74730.5	50877.3	55330.5	94792.6	108957	91541.7	143493	151569	63417.2	67550.1	92812.1	103717	64134.3	83301.1	68426.5	100142	77009.1	94241.5	62515.4	87108.4	119537	104981	94107.9	84602.8	119253	100669	92080.2	71504.3	46055.7	90349.3	127388	128171	100846	107181	95126.5	84992	101322	90866.5	97108.6
LIPID-N-0647	GP	PA	747.496	748.504	[M-H]-	C43H73O8P	57739.1	41992.9	69600.9	76324.6	148810	151373	139228	81784.1	69985.7	289771	209752	149658	114855	144442	271360	266090	115717	191649	147927	145233	250304	212666	100054	132144	269903	260330	157903	224338	288027	245381	233703	293260	115726	160979	242911	268803	188117	263736	238093	276620	240722	281245	244222
LIPID-N-0635	GP	PA	699.496	700.504	[M-H]-	C39H73O8P	41793	56198.7	78547.9	40383.2	41833.1	86036.6	37300.9	31712.9	40017.6	108046	61215	56376.3	42426.4	91384.1	67116.4	85369.3	54230.7	60911.8	54775.4	37053.2	63356.6	74813.8	40034.1	50767.3	96115	55300.2	32224.5	94486.9	87638.7	52678	68937.5	57712.5	62282.7	55846.1	110088	80544.9	43768.6	61206.6	66979.7	50476	49693.5	55719.2	49812.9
LIPID-N-0692	GP	PA	697.481	698.489	[M-H]-	C39H71O8P	35052.7	62370.9	42000.3	31535.8	20525.3	28024.1	66098.3	25928.2	34357.6	48732.5	47795.8	40582.4	27054	75918.2	48643	47754.4	56618.4	27906.1	36102.1	43277.7	84805.6	68637	37752.4	45448.4	71453.2	65203.6	61664.8	91113.2	73897.4	44153.9	58571.4	42866.9	60464.1	35728.4	50812.5	112831	53631.5	53589.6	74790.5	75677.3	55863.7	54819.3	109943
LIPID-N-1464	GP	PA	727.528	728.536	[M-H]-	C41H77O8P	23387.4	30829.5	58706.2	23780.2	36546.4	53645.1	39909.6	32440.6	36689.1	33567.8	53422.9	35984.5	36964.9	38898.9	54768.4	45921.3	39041	35107.5	44940.1	25635.8	75685.4	69748.2	27585.9	38057.6	47428.9	71822.1	42987	101554	97614.4	70495.8	110690	123794	41852.3	121197	85224.8	80921.2	74568	113965	77806.1	113946	73732.4	60113.5	105052
LIPID-N-1467	GP	PA	811.622	812.63	[M-H]-	C47H89O8P	11255.7	6581.3	13339.6	6827.09	7207.44	14908.4	11641.7	6716.06	6345.6	17028.9	10039.9	6163.7	2036.45	7121.94	8871.01	6642.66	7317.73	7503.05	8076.57	13278.1	4929.57	8732.04	10881.6	9796.74	10145.5	10452.6	10635.8	3080.69	12783	8563	3477.12	9222.42	3639.43	4617.35	7086.71	11884.8	7335.02	8795.17	7765.3	8732.05	5978.9	10489.7	5292.07
LIPID-N-1466	GP	PA	797.606	798.614	[M-H]-	C46H87O8P	4141.78	5904.24	7675.85	4986.29	5526.77	5297.95	7660.49	5480.08	5342.73	8358.96	6150.12	5254.25	6370.97	6751.14	7164.35	7938.3	5963.05	6640.79	5991.51	5814.87	9453.18	5771.88	6361.92	7985.13	10655.9	7984.06	5591.56	5627.73	8547.97	6268.25	8792.81	5343.29	8044.5	7716.02	6640	8517.85	8152.86	8320.17	9988.42	7615.45	7158.31	7758.58	8829.35
LIPID-N-1465	GP	PA	727.528	728.536	[M-H]-	C41H77O8P	47433.1	75571.2	124756	15173.1	36425.4	226353	58017	30298.4	16737.6	68565.9	136349	67557.8	38452.2	117396	60555.3	155411	63643.5	48690.2	51937.1	44956.2	229563	179747	31040.6	86627.4	141282	139083	102616	270390	204649	108842	97480.4	210093	80122.5	88021.7	212297	168705	136339	89153.3	198337	107718	185677	104805	140425
LIPID-N-1486	GP	PA	751.528	752.536	[M-H]-	C43H77O8P	123704	97925.7	143994	140974	283479	121501	237407	318957	148535	197253	230213	298280	310955	130465	389256	176416	273823	337213	368112	235081	269958	313024	260842	251603	164137	355399	332508	349433	382870	473649	397937	317015	146896	318849	439224	442022	548244	349121	402937	388128	386087	422169	451647
LIPID-N-1506	GP	PA	775.528	776.536	[M-H]-	C45H77O8P	10058.4	9400.01	15297.4	17662.8	16778.9	26200.1	20394.9	25019.8	14343.6	35092.4	32294.4	21752.7	23660.3	28998.6	42913.7	40810.6	21092.4	34759.3	33943.7	26197.5	39667.5	35682.4	24387.7	27793.8	35023.3	39340.6	31582.7	46815.8	48763.5	48016	42667.7	46373.3	15591.3	32396.5	36014.5	45380.1	46160.4	46964	49748.8	33872	44564.8	40925.1	44101.3
LIPID-N-1472	GP	PA	725.512	726.52	[M-H]-	C41H75O8P	34777	47219.2	103248	15096.4	27104.3	144985	68424.7	18533.6	15927	61655.1	111865	38300.7	52063.5	79581.4	79584.7	74422.2	87791.5	43784.6	59371.5	17218.3	216451	161429	21950.7	59644.3	83884.7	205254	80461.1	239660	219054	150456	196986	300610	79612.6	220750	169099	152746	168215	213856	194849	252196	184626	102388	213461
LIPID-N-1494	GP	PA	749.512	750.52	[M-H]-	C43H75O8P	25657.6	15747.5	34011	56964.5	79749.1	29670	74565.5	95612.1	46394.8	74642.2	71318.8	53651.4	116747	38136.1	139749	43628.5	107960	111321	119694	61654	111852	107531	68208.3	69169.6	49837	112859	100849	141902	136927	207102	220488	180205	38479.4	143585	132818	140201	188392	211720	137256	217067	122162	148457	156085
LIPID-N-0918	GP	PC	610.372	565.374	[M+COOH]-	C28H56NO8P	69833.3	77171.4	70631.5	73069.5	64669.8	64982	58411.6	57204.1	60177.4	45538.9	57626.5	58718.1	58956.3	56593.3	71311.4	63813.5	69771.5	64730.5	68375.2	74863.6	58298	63214.5	50979.8	51971.3	55555.5	66375.5	53915.8	58479.2	55745.7	61814.3	50340.4	60661.1	55318.5	64314.6	68511.4	56998.1	53841	90267.5	56658	55842.5	64680.1	58174	68725.1
LIPID-N-0980	GP	PC	722.497	677.5	[M+COOH]-	C36H72NO8P	5.33182e+06	5.0246e+06	4.49973e+06	3.90253e+06	4.10764e+06	4.61639e+06	4.27177e+06	3.92424e+06	4.61101e+06	3.45434e+06	3.20559e+06	3.56782e+06	3.9463e+06	3.49168e+06	3.56618e+06	3.82857e+06	3.31745e+06	3.3479e+06	3.20848e+06	3.79878e+06	4.03051e+06	3.52767e+06	3.42337e+06	3.75201e+06	3.98794e+06	3.75144e+06	3.30471e+06	4.09622e+06	2.96827e+06	3.31082e+06	3.60801e+06	3.32612e+06	4.48616e+06	3.9173e+06	3.67336e+06	3.22719e+06	3.92119e+06	3.62398e+06	3.38465e+06	3.50919e+06	3.06983e+06	3.43053e+06	3.19473e+06
LIPID-N-0978	GP	PC	692.45	647.453	[M+COOH]-	C34H66NO8P	24499.1	32617.2	30803.7	27851.4	27943.7	22985	22923	21505	22468.7	14469.6	25422	21607.6	22221.4	20623.9	34079.5	23154.3	26899.3	26283.2	22590.1	30097	19845	24893.5	16377.7	16885.6	17009.4	26803.2	15964	20954.7	22408	21781.9	14732.9	21074.1	23944.8	20335.7	28653.8	18848	21893.7	43310.7	22319.6	15793	21410.3	17422.1	26088.3
LIPID-N-0983	GP	PC	716.45	671.453	[M+COOH]-	C36H66NO8P	10355.5	9006.09	12371.6	11761.4	10844.5	12785.1	10871.2	10622.3	10454.9	8285.16	9505.52	8477.49	13482.3	9455.62	10268.5	11715.8	10707.9	11652.3	9275.15	10016.9	11371.7	11703	9460.95	9748.52	12709.5	10694.4	11343.3	10059.4	9376.02	12722.7	10518.4	11559.6	9010.87	11496	9684.51	10717.8	9935.46	10892.5	9829.39	10882.5	9271.18	11814.5	10897.9
LIPID-N-0989	GP	PC	748.513	703.515	[M+COOH]-	C38H74NO8P	63885.4	24890.6	55239	7456.99	8790.46	7370.99	25312.3	27623	3332.9	1920.3	678.572	6576.36	9420.73	8070.76	3404.95	3366.81	41543	10012.1	7875.05	690.132	25603.1	31892	51787.4	4038.29	7504.4	48510.7	14828.5	190809	121743	51114.8	138125	171825	75060.8	59698.2	92961.8	83391.8	167605	103490	92144.8	118048	11346.5	158060	42906.2
LIPID-N-1026	GP	PC	798.529	753.531	[M+COOH]-	C42H76NO8P	6333.9	5214.86	6447.87	8588.63	7027.32	6349.65	7497.93	7934.66	6350.62	7144.36	7283.18	7426.29	6136.37	6852.97	7708.77	7145.42	5641.77	7521.33	6464.59	7404.22	7675.62	6016.15	8710.53	7271.51	6606.59	7436.61	7680.5	7397.5	6240.93	8333.59	7269.36	8585.6	6018.52	8020.3	6094.12	5832.07	6713.73	7149.59	7320.25	7750.68	8058.08	6970.3	7645.31
LIPID-N-0979	GP	PC	708.482	663.484	[M+COOH]-	C35H70NO8P	386980	409616	417437	437188	373561	405286	407654	393514	434885	422811	424900	405931	412954	396210	401749	396182	376520	430623	406667	400833	433847	416064	395549	383633	415849	425738	419729	409185	439498	438400	391094	421032	397977	420307	364676	382089	390355	417485	405715	406603	425573	386266	395519
LIPID-N-0202	GP	PC	722.497	677.5	[M+COOH]-	C36H72NO8P	53367.9	49469.1	33109.9	26290.8	27597.3	25299.8	32282.3	36620.1	38868.8	30738.8	28701.5	30210.5	21655.2	22256	27768.1	20147.2	47327	33883.6	12089.8	19726.4	28094	32357.1	25682.1	32284.2	65210.3	52175.7	35306.7	101341	61424.1	51719.8	147555	165582	36760.4	52675.4	34614.6	80405.6	80261.7	60696.2	74705.9	111042	43406.6	92377.6	48958.7
LIPID-N-0217	GP	PC	776.544	731.547	[M+COOH]-	C40H78NO8P	1.05468e+06	1.06695e+06	1.13507e+06	814529	569643	1.08038e+06	909038	848856	878863	974929	863121	1.25146e+06	725883	1.14879e+06	710905	993773	1.19188e+06	944905	758692	725942	1.14041e+06	1.19211e+06	894759	980481	1.25172e+06	1.20874e+06	939894	1.67681e+06	1.28162e+06	1.05546e+06	1.62068e+06	1.61347e+06	1.16991e+06	1.20472e+06	1.25179e+06	1.6514e+06	1.34236e+06	1.11167e+06	1.36713e+06	1.22058e+06	1.07484e+06	1.3431e+06	1.15167e+06
LIPID-N-0229	GP	PC	774.529	729.531	[M+COOH]-	C40H76NO8P	385175	369837	396646	188129	118920	336505	237911	192567	106221	172623	259012	227627	99522.8	333544	125290	293210	408115	210948	81235.1	108671	583926	566836	165127	237870	378279	642794	250599	825421	654472	374739	685336	1.16955e+06	466678	381016	544185	903247	734470	424340	829932	672695	408083	551380	419438
LIPID-N-0268	GP	PC	798.529	753.531	[M+COOH]-	C42H76NO8P	71728.3	52858.8	53548.5	69763.3	41917.1	59383.8	63449.1	83777.2	80641.4	80638.3	54796.9	92625.8	34751.3	62369.5	44101.9	69941.7	97110.5	57018.9	38315.5	51233.8	78290.1	79205.2	58688	68851.1	100813	128701	68847.5	162959	147490	88261.3	181259	184994	61478.7	85051.1	88200.2	186185	132796	99456.4	141418	118964	77853.9	138999	74721.6
LIPID-N-0300	GP	PC	822.529	777.531	[M+COOH]-	C44H76NO8P	11424.5	8786.36	6710.69	11404.8	5259.72	16821.3	9051.36	10471.3	15212.5	21073.7	11463.6	24859.5	5615.37	16130.9	4697.36	19244.6	20085.6	17546.6	9175.21	7921.04	20061	19458.6	20088.5	16034.9	20058.7	20644.9	9341.62	27327.6	35089.8	17549.5	46197.5	38665.7	16382.5	23349.4	14820.3	30414.5	31106.1	15701.3	38597.2	27904.4	20181.3	30705.5	15519.8
LIPID-N-0906	GP	PC	790.56	745.562	[M+COOH]-	C41H80NO8P	91087.5	117207	103096	66307.2	52949.5	98498.8	55751.7	55226.8	80488.4	82071.3	82079.4	92133.9	51895.6	132929	61957.8	117567	69426.6	88966.2	43283.8	60361.1	129205	150415	42365.4	82578.9	179556	93206.4	89221.9	126574	80760.4	68921.3	160474	163654	105912	88968.6	98498.8	137173	77305.5	98185.2	122332	79426.6	127617	81021.7	100627
LIPID-N-0253	GP	PC	814.56	769.562	[M+COOH]-	C43H80NO8P	145622	136150	148198	164093	220116	189768	208814	339018	219059	399889	260130	151959	183915	208812	217540	291727	281643	233521	284482	448442	212242	168871	263892	287806	376882	231611	217743	226201	346040	337897	180227	147730	164174	214907	154539	294726	226087	235632	230432	261698	153358	231547	187554
LIPID-N-0269	GP	PC	812.544	767.547	[M+COOH]-	C43H78NO8P	51350.1	29940.3	16434.1	58152.7	39428.2	23392.7	27404.9	63013.9	83650	47212.9	34140.6	71232.8	32302.5	47208.3	33271.6	51569.5	70397.8	55730.4	32305	39758	58863.6	70749.4	48036.4	63244.7	67988	48990.9	72426.5	45180.2	56317.5	49693.9	81165.7	73110.9	41633.2	41073.5	30800.8	65427.9	65754.8	25101.9	64606.1	44358.8	66248.3	48869.7	62946.2
LIPID-N-1044	GP	PC	836.544	791.547	[M+COOH]-	C45H78NO8P	30162.8	37714.7	58564.5	15085	32719.7	32767.8	44621.1	38118.7	16980.4	16074.8	22524.3	35823	26474.3	29304.6	34019.9	35910	45355.5	41588.9	38760.7	17882.6	44553.9	47322.4	42466.9	31682.6	45650.8	48445.3	32652.3	76404.7	59414.7	55554.7	26412.3	59500.4	20797.4	58699.7	47415.2	66958.7	52059.9	54973.7	51870.6	72078.7	38743.3	59560.1	81269.1
LIPID-N-0203	GP	PC	750.529	705.531	[M+COOH]-	C38H76NO8P	1.09693e+06	982490	724483	718274	652408	580317	809655	686696	802679	621415	634389	666520	434683	587643	724643	633642	924017	657958	481721	759806	662298	645880	652266	754175	1.27082e+06	795578	620105	975999	710694	818286	1.30126e+06	1.54927e+06	744841	853079	790888	1.20801e+06	878949	818941	1.05197e+06	1.20128e+06	742613	1.06617e+06	815908
LIPID-N-0206	GP	PC	778.56	733.562	[M+COOH]-	C40H80NO8P	9.74826e+06	1.07239e+07	1.02631e+07	9.28521e+06	9.79311e+06	8.8272e+06	8.54817e+06	7.91672e+06	1.07836e+07	1.0942e+07	9.21751e+06	8.22498e+06	6.67526e+06	8.92142e+06	1.22793e+07	1.18975e+07	9.80819e+06	7.45605e+06	9.14301e+06	1.1479e+07	1.04189e+07	1.0609e+07	7.55001e+06	9.32606e+06	1.44452e+07	8.774e+06	7.4309e+06	9.22711e+06	8.3246e+06	1.01198e+07	9.0195e+06	1.14213e+07	9.40025e+06	8.73485e+06	8.92317e+06	1.07757e+07	6.91967e+06	1.11005e+07	9.9352e+06	1.09293e+07	9.58704e+06	9.803e+06	1.03064e+07
LIPID-N-0216	GP	PC	776.544	731.547	[M+COOH]-	C40H78NO8P	2.15281e+06	3.12121e+06	1.76938e+06	4.25886e+06	2.24741e+06	2.40723e+06	2.8532e+06	2.56598e+06	2.80514e+06	8.38803e+06	2.59652e+06	6.85258e+06	2.20009e+06	3.39401e+06	3.67582e+06	4.55182e+06	3.10362e+06	2.69929e+06	2.88424e+06	4.07919e+06	2.43201e+06	1.96387e+06	1.86449e+06	3.25713e+06	6.83502e+06	2.02193e+06	1.70277e+06	2.50063e+06	2.69769e+06	1.80849e+06	2.40156e+06	2.46296e+06	1.98868e+06	2.27803e+06	1.9883e+06	4.35506e+06	1.29148e+06	2.23634e+06	1.98198e+06	2.09798e+06	2.00006e+06	2.234e+06	1.18776e+06
LIPID-N-1014	GP	PC	790.56	745.562	[M+COOH]-	C41H80NO8P	510919	393129	358997	675763	772582	705825	420417	674422	575658	955142	627828	1.03448e+06	863969	881623	778086	1.0692e+06	748151	961708	807236	919786	726364	770266	754303	968535	667773	518865	593573	580307	759282	808202	666699	853581	483339	719005	383354	643553	862594	430645	868332	868050	1.0092e+06	611112	727851
LIPID-N-0218	GP	PC	804.575	759.578	[M+COOH]-	C42H82NO8P	5.17478e+07	7.51823e+07	7.80968e+07	5.09755e+07	4.79756e+07	7.62648e+07	6.71874e+07	4.80652e+07	5.07397e+07	9.36869e+07	6.67224e+07	7.33404e+07	4.89301e+07	8.4164e+07	6.16178e+07	9.59774e+07	5.86451e+07	5.74647e+07	5.58971e+07	5.07861e+07	8.78925e+07	8.36508e+07	4.86655e+07	6.70416e+07	8.97477e+07	7.46992e+07	4.93907e+07	8.95721e+07	7.58922e+07	5.54743e+07	5.43136e+07	7.37e+07	7.29359e+07	6.19358e+07	7.9498e+07	9.16887e+07	5.26493e+07	6.71395e+07	8.20499e+07	5.9029e+07	6.41643e+07	5.68337e+07	5.60278e+07
LIPID-N-0232	GP	PC	802.56	757.562	[M+COOH]-	C42H80NO8P	2.97955e+07	4.26067e+07	4.0732e+07	2.98838e+07	2.44422e+07	3.92833e+07	3.37022e+07	2.68166e+07	2.02395e+07	3.67277e+07	3.78316e+07	3.01493e+07	2.807e+07	4.36779e+07	3.59572e+07	4.71834e+07	3.63216e+07	3.38737e+07	2.6781e+07	2.85004e+07	5.07204e+07	4.76745e+07	2.52073e+07	3.39261e+07	3.89622e+07	4.52275e+07	3.20944e+07	5.20591e+07	4.90054e+07	4.05498e+07	3.06675e+07	4.67998e+07	4.23158e+07	3.32333e+07	4.50116e+07	4.46911e+07	3.79472e+07	3.87619e+07	5.01181e+07	4.33506e+07	4.33861e+07	3.86086e+07	4.48757e+07
LIPID-N-0251	GP	PC	800.544	755.547	[M+COOH]-	C42H78NO8P	377850	634392	830022	785631	299539	649386	514303	296195	413850	1.08959e+06	959280	952488	501405	1.05492e+06	618175	1.09362e+06	654849	494582	388070	298125	1.30034e+06	1.35214e+06	386418	677698	1.50886e+06	781091	714668	1.29928e+06	1.22972e+06	538885	860631	1.29711e+06	947838	852820	909596	1.12316e+06	641525	454405	1.02448e+06	703108	970041	733974	983565
LIPID-N-1030	GP	PC	820.607	775.609	[M+COOH]-	C43H86NO8P	61391.6	45219.3	79776.6	40650.5	47193.6	46393.8	51247.3	43967.6	44556	43894.8	38969.5	45514.1	40732.3	45144.3	63671	53315.8	48378.5	37348.9	40735.6	52096.2	58699.5	63303.4	37205.6	43749	66023.2	47588.2	41853.3	61858.2	45671.4	53529.5	57861.5	72051.2	48569.1	54854.2	52574.6	55141.7	46244.9	62383.8	52205.9	58449.9	65146.2	57140	96557.7
LIPID-N-0255	GP	PC	828.575	783.578	[M+COOH]-	C44H82NO8P	5.53577e+06	5.28593e+06	5.92587e+06	1.16158e+07	6.08673e+06	6.23025e+06	8.08236e+06	1.13832e+07	7.64062e+06	1.10486e+07	8.27298e+06	8.2584e+06	7.77811e+06	8.66706e+06	6.86718e+06	1.01795e+07	7.43114e+06	9.11806e+06	9.4546e+06	1.12943e+07	8.50787e+06	6.69079e+06	9.15027e+06	8.12376e+06	1.17428e+07	9.07209e+06	6.30771e+06	9.87109e+06	9.75766e+06	9.02987e+06	6.72124e+06	7.10501e+06	5.86045e+06	8.17553e+06	5.97394e+06	9.34455e+06	7.41711e+06	6.86937e+06	8.76518e+06	7.9504e+06	6.54971e+06	7.25272e+06	6.88747e+06
LIPID-N-0272	GP	PC	826.56	781.562	[M+COOH]-	C44H80NO8P	1.15358e+07	9.97995e+06	9.0813e+06	1.7269e+07	1.40973e+07	1.58656e+07	1.3017e+07	1.57733e+07	1.7912e+07	1.9616e+07	1.27091e+07	1.6701e+07	1.57795e+07	1.35631e+07	1.7948e+07	1.79827e+07	1.79655e+07	1.44748e+07	1.78288e+07	1.7024e+07	1.3346e+07	1.65759e+07	1.51921e+07	1.71142e+07	1.49531e+07	1.54374e+07	1.55955e+07	1.49675e+07	1.5918e+07	1.55314e+07	1.48193e+07	1.56901e+07	1.17162e+07	1.15807e+07	1.31035e+07	1.64622e+07	1.49566e+07	1.38041e+07	1.60604e+07	1.30334e+07	1.37825e+07	1.3771e+07	1.52662e+07
LIPID-N-0284	GP	PC	824.544	779.547	[M+COOH]-	C44H78NO8P	412249	1.3533e+06	1.12264e+06	458779	297290	1.84591e+06	543159	204646	185533	613206	574265	704204	706430	744599	867829	1.00645e+06	512984	1.02127e+06	442821	716935	614558	473956	498837	399455	685988	465568	660463	587461	694528	454786	899501	660538	336910	468663	366214	521974	384410	346113	486944	409565	896339	747544	345139
LIPID-N-0211	GP	PC	862.654	817.656	[M+COOH]-	C46H92NO8P	4764.74	6906.12	8819.26	1854.09	4348.12	3557.88	4085.26	3755.65	3328.93	3004.52	3798.4	3574.75	3047.22	3793.75	4496.29	4058.74	2879.39	4019.09	2943.54	3058.94	6021.11	6520	2776.21	3600.48	6537.26	7373.05	3991.88	5533.61	7722.89	5426.24	4629.14	7178	5943.42	5597.32	6729.92	5882.07	6471.62	6322.13	6406.78	3339.13	6534.83	6010.92	6860.6
LIPID-N-0291	GP	PC	852.575	807.578	[M+COOH]-	C46H82NO8P	194394	347988	128801	104780	129577	358857	136131	146466	103828	201992	210727	163879	126732	198200	220141	309773	196532	330914	198221	233594	270480	282392	178168	175851	217858	137072	252297	269542	256384	249787	239215	234792	126707	134266	140825	145758	328395	119229	199155	177607	297399	138160	235383
LIPID-N-0303	GP	PC	850.56	805.562	[M+COOH]-	C46H80NO8P	1.49629e+06	1.59071e+06	1.37124e+06	2.97316e+06	1.914e+06	2.55276e+06	2.24307e+06	2.70995e+06	2.60101e+06	3.85046e+06	2.63666e+06	3.72716e+06	2.73071e+06	2.50273e+06	3.08272e+06	4.20923e+06	2.34098e+06	3.87084e+06	4.07753e+06	3.42953e+06	2.92305e+06	3.59833e+06	3.27054e+06	3.61236e+06	2.30028e+06	2.4641e+06	2.46742e+06	2.93663e+06	3.1336e+06	3.14396e+06	2.29292e+06	3.08047e+06	1.88583e+06	1.95841e+06	2.07213e+06	2.18291e+06	3.46505e+06	2.39232e+06	3.11431e+06	2.28689e+06	2.9392e+06	2.30133e+06	2.68486e+06
LIPID-N-0212	GP	PC	890.685	845.687	[M+COOH]-	C48H96NO8P	7591.28	7346.69	7295.69	5145.58	5820.75	6518.47	6264.3	6184.52	7162.22	5099.9	6667.38	7188.98	4901.22	6693.46	7024.48	6242.26	5392.87	7375.8	4670.22	5738.42	6249.58	7795.12	6139.67	7498.87	10077.3	6895.99	4913.08	7295.21	6021.17	5832.99	5943.7	7874.54	6905.82	8492.61	6539.23	6538.93	7361.02	7991	7508.49	7734.89	5739.86	6456.37	6293.69
LIPID-N-0213	GP	PC	918.716	873.719	[M+COOH]-	C50H100NO8P	3610.62	4897.27	3063.23	2557.79	2903.74	2941.61	2589.85	2757.39	6730.15	3035.64	4015.66	3325.59	2116.04	4060.53	2884.56	4295.41	2018.21	3063.46	2015.21	3874.44	2996.73	3516.01	2351.74	4185.04	4860.69	3310.46	2419.43	3366.05	3079.02	2790.25	2368.97	3844.79	3485.27	3369.99	3653.47	3356.46	2162.03	2115.86	3470.56	3313.55	3188.2	2771.42	2538.46
LIPID-N-0228	GP	PC	774.529	729.531	[M+COOH]-	C40H76NO8P	101244	143895	134822	312069	110830	140012	137100	162436	218432	827621	154715	1.1591e+06	125327	283624	175271	308081	236559	126262	149733	249188	147571	94317.4	102948	186360	656173	134205	64812.9	178849	221229	106360	232504	176248	115453	214856	108914	291880	55513.4	111109	140304	101085	130815	132529	52889.2
LIPID-N-0231	GP	PC	802.56	757.562	[M+COOH]-	C42H80NO8P	752628	1.20768e+06	1.3993e+06	815716	495325	1.43732e+06	934413	723192	742166	2.44541e+06	1.38692e+06	2.66251e+06	567249	2.11524e+06	832144	2.08312e+06	1.08298e+06	790044	704901	639960	1.44365e+06	1.65353e+06	663839	981723	2.37862e+06	1.32129e+06	597737	1.72648e+06	1.47606e+06	640935	1.15262e+06	1.5779e+06	1.31328e+06	1.4256e+06	1.28204e+06	1.92558e+06	580107	1.01081e+06	1.63713e+06	620924	971138	875173	621938
LIPID-N-0250	GP	PC	800.544	755.547	[M+COOH]-	C42H78NO8P	834146	1.22405e+06	1.14954e+06	796817	419348	1.31613e+06	686313	628953	624960	1.62154e+06	1.48743e+06	1.68325e+06	544669	1.98092e+06	610226	2.11788e+06	1.20407e+06	713600	390195	522640	1.85402e+06	2.07681e+06	429880	1.09537e+06	2.04046e+06	1.7727e+06	775625	1.95465e+06	1.9887e+06	746050	1.0731e+06	1.96085e+06	1.63084e+06	1.16895e+06	1.33408e+06	2.20858e+06	705021	702479	1.83822e+06	832577	1.24745e+06	827481	792901
LIPID-N-0266	GP	PC	798.529	753.531	[M+COOH]-	C42H76NO8P	7678.48	12047.3	18232.7	9339.07	6099.78	19503.2	9267.26	4079.95	9369.58	28354.5	23955.5	53835.6	11916.3	45487.2	17823.9	43470.8	20627.8	10855.4	6192.58	4981.72	50349.7	42486.1	6688.23	22994.8	67539.6	28234.5	14763	43650.1	35639.8	13151.4	20777.1	36671.7	27299.3	27942.2	28702.6	41769.1	13314.4	10189.2	26919.9	12068.6	35508.4	11746.1	14092.6
LIPID-N-1035	GP	PC	826.56	781.562	[M+COOH]-	C44H80NO8P	20693.6	26260.2	26942.4	66179.8	16024.2	31461.2	30426.6	52593.5	54624.7	97738.6	39947	111415	10772.5	56595.3	24968	44723.4	41169.2	33814.7	25103.2	53500.1	50227	46380.3	31936.8	46372.4	108739	45881.3	16735.3	57307.7	67410.4	34902.2	34514.8	35377.6	41373	55439.8	31853	74925.8	18128.8	36480.7	48606	19843.3	30817.3	22922.7	21490.4
LIPID-N-0313	GP	PC	848.544	803.547	[M+COOH]-	C46H78NO8P	10023.1	9708.52	11118.5	50657.1	12068.8	27486.1	17422.7	21444.2	32109.7	62801	26108.8	103820	22078.9	32715.9	23081.2	45737.6	32049.7	28379.1	23957.4	21703.8	39191	40400.9	25425.3	33333.9	44892	35843.1	19097.7	33532.1	48741.3	27767.3	49166.8	38225.1	23018.8	47467.5	18522.2	46159.8	21891.4	30301.8	49169.2	20901.6	33954.4	23084.6	23750.9
LIPID-N-1015	GP	PC	790.56	745.562	[M+COOH]-	C41H80NO8P	72190.9	113435	50748.7	185944	84797.6	109161	105912	86339.3	110097	407216	108111	278953	82432.8	125136	148920	194789	103379	105970	96137.5	178773	72395.8	80151.9	88291.1	117634	297415	74974.4	67727.2	97897.9	106488	94592.8	99241.6	113933	85721.2	106814	88219.6	189542	41750.6	73006.8	81202.5	91014.4	63162.5	82126.4	58502.5
LIPID-N-0219	GP	PC	818.591	773.593	[M+COOH]-	C43H84NO8P	2.68017e+06	3.87772e+06	4.00878e+06	2.78831e+06	2.50267e+06	4.04478e+06	3.4783e+06	2.38625e+06	2.50527e+06	5.24748e+06	3.27206e+06	3.46253e+06	2.57181e+06	4.33379e+06	3.21862e+06	4.87712e+06	2.97164e+06	2.87974e+06	2.9088e+06	2.72867e+06	4.32006e+06	4.50646e+06	2.38326e+06	3.64723e+06	4.72599e+06	3.78159e+06	2.42262e+06	4.77044e+06	3.88755e+06	2.7673e+06	2.7591e+06	3.79451e+06	3.65727e+06	3.25988e+06	4.05353e+06	4.86543e+06	2.58318e+06	3.17576e+06	4.02657e+06	2.98662e+06	3.38357e+06	2.9546e+06	2.84847e+06
LIPID-N-0234	GP	PC	816.575	771.578	[M+COOH]-	C43H82NO8P	1.30274e+06	2.15475e+06	2.35822e+06	1.37419e+06	1.15815e+06	2.08402e+06	1.6668e+06	1.3812e+06	976564	1.91928e+06	2.14201e+06	1.50534e+06	1.43373e+06	2.42384e+06	1.93804e+06	2.39702e+06	2.04023e+06	1.85661e+06	1.26706e+06	1.53328e+06	2.71714e+06	2.6615e+06	1.25402e+06	1.71343e+06	2.1817e+06	2.65868e+06	1.73366e+06	2.85641e+06	2.49364e+06	2.16032e+06	1.62071e+06	2.65083e+06	2.3006e+06	1.78605e+06	2.32334e+06	2.41002e+06	1.99902e+06	2.03979e+06	2.58135e+06	2.16931e+06	2.32341e+06	2.08243e+06	2.71339e+06
LIPID-N-0256	GP	PC	842.591	797.593	[M+COOH]-	C45H84NO8P	297783	291502	334738	615569	343659	396115	494489	566571	400084	647104	386710	499606	413203	485643	360857	618908	458324	523830	513653	632717	527370	404375	483216	550358	737270	491187	369399	577135	611275	497376	387890	379935	328280	391635	360584	557471	425518	403932	436134	443166	335558	416113	429165
LIPID-N-1043	GP	PC	838.56	793.562	[M+COOH]-	C45H80NO8P	16624.6	53323.3	49329.6	17266.4	11723.1	87720.3	23567.9	10448.3	9129.97	28674.8	22577.1	32335.7	30417.7	23298.9	32494.3	43801.7	26844.3	48666	22580.6	20746.6	27787.7	16059.2	17084	17366.4	36383.4	23434.6	23564.3	16125.9	28120.5	14647.6	41333.5	38851.4	10492.5	21618.1	14190.1	22684.5	14825.3	19252.5	19620.5	12418.8	45142.6	27181.9	18921.1
LIPID-N-0258	GP	PC	856.607	811.609	[M+COOH]-	C46H86NO8P	3.71603e+06	2.78892e+06	4.02288e+06	7.72355e+06	4.71048e+06	3.70553e+06	5.67776e+06	9.167e+06	5.20426e+06	5.29717e+06	4.30319e+06	4.02262e+06	6.05842e+06	5.06866e+06	4.55923e+06	5.15516e+06	6.06194e+06	6.03085e+06	6.36794e+06	8.16948e+06	5.78528e+06	4.61252e+06	7.41814e+06	6.12786e+06	7.86862e+06	5.79047e+06	4.54617e+06	6.02025e+06	6.50896e+06	4.86183e+06	4.37617e+06	4.48226e+06	4.16176e+06	5.427e+06	3.81074e+06	4.51287e+06	5.74749e+06	5.17699e+06	5.14887e+06	5.39587e+06	3.82604e+06	4.5005e+06	4.78012e+06
LIPID-N-0275	GP	PC	854.591	809.593	[M+COOH]-	C46H84NO8P	1.38138e+07	1.00068e+07	1.0308e+07	2.10772e+07	1.73727e+07	1.82365e+07	1.58502e+07	1.90929e+07	1.9092e+07	1.64979e+07	1.49858e+07	1.64901e+07	1.87717e+07	1.79312e+07	1.90537e+07	1.75825e+07	1.93401e+07	1.66799e+07	1.95687e+07	1.82242e+07	1.74638e+07	2.27303e+07	2.04002e+07	2.16617e+07	1.85871e+07	1.85818e+07	2.07002e+07	1.82644e+07	1.8222e+07	1.65965e+07	1.62815e+07	2.04805e+07	1.71554e+07	1.23768e+07	1.71497e+07	1.63953e+07	1.59982e+07	1.54716e+07	1.97117e+07	1.37055e+07	1.61401e+07	1.55765e+07	1.6253e+07
LIPID-N-0907	GP	PC	888.669	843.672	[M+COOH]-	C48H94NO8P	22260.3	24952.7	39645.1	32157.3	19381.9	50742.8	43163.5	33475.3	20432.3	14264.3	32057.8	31168.3	31194.6	43002.3	50875.9	43516.8	43775.4	52578.2	46450.8	26713.3	60782.4	49366.3	35649.5	55496.6	39681.9	58140	49333.8	57258.8	40103.1	40989.6	30242.2	52971.4	39362.6	27345.2	45807.1	54357.3	39700	47634.2	58812.8	40888	56146.7	68548.8	69507.6
LIPID-N-0296	GP	PC	880.607	835.609	[M+COOH]-	C48H86NO8P	109406	150285	72787.5	78779.7	91661.2	235644	126482	97831.1	87365.4	105539	160602	85941.6	74109.3	160426	170127	204512	130175	257891	124715	150442	190158	200743	145437	163495	178256	104999	153965	147801	191817	133961	143234	156895	117794	94746.7	98284.9	93866.4	214232	110604	128164	106764	167039	121870	158811
LIPID-N-0308	GP	PC	878.591	833.593	[M+COOH]-	C48H84NO8P	899468	890239	674269	1.64107e+06	1.28749e+06	1.62477e+06	1.66252e+06	1.87104e+06	1.26348e+06	1.69793e+06	1.53436e+06	1.76563e+06	1.76045e+06	1.54675e+06	1.7651e+06	2.12821e+06	1.64273e+06	2.59593e+06	2.39828e+06	2.25244e+06	1.68661e+06	2.3211e+06	2.29316e+06	2.37341e+06	1.52484e+06	1.44978e+06	1.35338e+06	1.80794e+06	1.83229e+06	1.66257e+06	1.29461e+06	1.90136e+06	1.29566e+06	1.32316e+06	1.34506e+06	1.03881e+06	2.23334e+06	1.52095e+06	1.92656e+06	1.38023e+06	1.66346e+06	1.34999e+06	1.59086e+06
LIPID-N-1033	GP	PC	814.56	769.562	[M+COOH]-	C43H80NO8P	174167	126700	188252	216195	192775	163401	210393	212818	157396	172204	262292	240712	231971	210385	229975	192283	182970	252607	218229	160468	228978	218704	194733	257858	232397	230941	225561	239568	227538	233175	224605	227046	185294	230475	238821	238291	250027	271598	231508	236659	194704	222635	222630
LIPID-N-0235	GP	PC	830.591	785.593	[M+COOH]-	C44H84NO8P	6.17718e+06	9.91647e+06	1.58992e+07	3.2637e+06	4.95999e+06	7.9959e+06	7.29129e+06	4.07089e+06	2.48654e+06	8.75453e+06	5.93567e+06	7.39156e+06	6.41743e+06	8.77722e+06	7.91101e+06	9.00625e+06	7.28688e+06	5.57535e+06	6.11079e+06	2.54289e+06	1.25436e+07	1.28125e+07	5.51244e+06	4.47284e+06	8.88002e+06	1.26019e+07	5.17423e+06	1.10931e+07	1.02365e+07	8.39434e+06	9.03908e+06	1.36448e+07	9.92553e+06	1.45592e+07	1.11734e+07	1.35709e+07	9.56988e+06	1.55551e+07	1.2686e+07	1.22685e+07	8.05552e+06	9.45046e+06	1.64121e+07
LIPID-N-0254	GP	PC	828.575	783.578	[M+COOH]-	C44H82NO8P	3.96545e+06	6.54688e+06	8.92542e+06	2.34081e+06	3.60874e+06	4.53626e+06	5.12343e+06	2.82388e+06	1.45853e+06	2.91374e+06	4.1307e+06	3.2666e+06	4.65795e+06	5.33866e+06	5.64733e+06	5.49272e+06	6.14547e+06	4.20579e+06	3.28082e+06	1.52723e+06	1.23024e+07	1.06728e+07	3.46316e+06	2.85191e+06	5.47669e+06	9.7739e+06	4.87792e+06	9.9649e+06	7.98657e+06	7.22369e+06	7.55026e+06	1.08497e+07	8.84183e+06	9.22811e+06	8.19129e+06	9.08365e+06	8.42624e+06	1.05026e+07	1.11656e+07	1.05347e+07	7.57433e+06	7.82202e+06	1.25165e+07
LIPID-N-1040	GP	PC	842.591	797.593	[M+COOH]-	C45H84NO8P	48841.1	116194	169355	65853	89739.9	91108.1	111307	66405.3	32950.9	59270.6	70452.5	59179	80883.3	125034	105285	112701	104220	80765.8	67725	41393.6	217882	206644	72420	51453.1	110310	200082	96286.4	181355	158266	137767	145995	172114	146858	168416	137429	195407	137430	191668	169348	183173	150020	125085	233903
LIPID-N-0290	GP	PC	852.575	807.578	[M+COOH]-	C46H82NO8P	640751	1.06107e+06	1.05277e+06	1.49784e+06	1.19768e+06	1.20037e+06	1.30167e+06	1.01312e+06	1.41281e+06	1.61339e+06	1.37092e+06	1.44927e+06	1.44751e+06	1.50941e+06	1.41997e+06	1.81314e+06	1.78089e+06	1.15647e+06	1.36333e+06	710085	2.031e+06	2.10761e+06	1.30189e+06	1.20149e+06	1.7269e+06	2.16781e+06	1.46691e+06	1.8259e+06	1.72535e+06	1.61286e+06	2.1063e+06	1.95199e+06	1.43231e+06	1.94596e+06	1.76421e+06	2.0459e+06	1.47285e+06	2.31949e+06	2.13676e+06	1.96104e+06	1.41499e+06	1.48193e+06	1.68867e+06
LIPID-N-0905	GP	PC	850.56	805.562	[M+COOH]-	C46H80NO8P	30361.5	91076.7	128862	50581.2	25410.6	166680	51030.3	16004.4	19307.3	50010.7	50955.8	71149	56920.5	72100.6	53236.7	71146.1	39848.9	73607.8	14302.9	40572.1	99489.3	74853.9	32529.8	14540.7	57391	57043.5	57049	70117.4	75888	44349.9	124085	72957	34105	79590.4	39135	67358.2	27682.1	63481.4	55030.4	47184.8	92821.4	67347.8	53128.4
LIPID-N-0225	GP	PC	888.669	843.672	[M+COOH]-	C48H94NO8P	23842.6	29672.3	31639.4	9299.84	14647.8	25491.2	22156.6	13259.3	11164.5	16048.4	16615.4	10255.5	18592	23970.3	21624.6	25363.6	19975.2	19533.9	15177.4	10701.1	35294.8	42097.5	15639	20673.1	27696.8	41717	16493.6	36075.8	33052	22636.6	25299.1	40005.2	33805	28089.3	34504.5	29861.6	28786	36996.4	36139	29797.2	19720.5	26839.1	23844.8
LIPID-N-0315	GP	PC	876.575	831.578	[M+COOH]-	C48H82NO8P	57780.5	119731	123307	158286	138224	152989	164346	101340	135159	232984	190902	287240	184047	212043	174272	241875	217866	239211	201869	151470	296723	312144	182540	187053	176744	275459	142468	242902	232990	204200	267155	201930	147908	325158	180095	200424	225532	272654	308873	269252	192576	186719	226322
LIPID-N-0243	GP	PC	914.685	869.687	[M+COOH]-	C50H96NO8P	11244.9	14481.2	14413.7	12062.2	8989.47	12541.5	10473.3	7684.61	13123.5	13122.4	8678.13	7375.27	10798	14542.4	14350	15114.9	10280.1	11122.4	8934.44	7962.46	11883.5	13315.9	9482.4	12235.2	20937.7	16030.1	10216.9	13769.2	12467.8	12994.8	12733.9	13703.1	11701	15835	14480	16287.1	12151.9	23893	14118.6	16279.5	11063.5	13628.4	11830.7
LIPID-N-0270	GP	PC	826.56	781.562	[M+COOH]-	C44H80NO8P	1.22356e+06	1.66574e+06	2.53546e+06	596266	855815	1.54512e+06	1.13643e+06	596077	423273	786617	1.43015e+06	937516	1.19645e+06	2.1215e+06	1.14622e+06	2.08238e+06	1.60019e+06	1.10397e+06	677755	296083	5.26029e+06	4.91705e+06	657501	869534	1.70302e+06	4.0034e+06	1.70578e+06	4.03549e+06	3.43365e+06	2.20642e+06	2.51918e+06	3.86495e+06	3.2736e+06	2.68228e+06	3.16143e+06	3.72853e+06	2.83935e+06	2.66456e+06	3.7541e+06	3.17168e+06	3.3041e+06	2.3726e+06	4.84659e+06
LIPID-N-0287	GP	PC	824.544	779.547	[M+COOH]-	C44H78NO8P	53022.4	72006.7	101916	26343.6	24319.1	82672.1	33665.4	23351.8	11694.6	30129.7	69617.1	43387.8	58248.8	131644	45923.8	106896	62626.9	28008.2	28378.3	4500.29	390677	332271	27007.3	46010.5	102046	196787	78871	202770	158273	62253.4	85018.3	232346	173135	114838	141392	174103	100079	94871.1	158281	100911	142515	79505	170646
LIPID-N-1041	GP	PC	840.575	795.578	[M+COOH]-	C45H82NO8P	57743.4	74679.7	114688	29504.3	36608.4	73773	47350.4	26219.4	15827.2	29384.4	49212.8	28874.3	45931.6	81365.7	64958.4	103009	91208	38511.4	30709.4	20346.9	237944	203203	36090.6	31571.3	58830.6	182191	70777	186960	145669	74117.6	91715.4	173038	148312	110097	150726	161434	129150	123532	135755	133481	123351	110231	248376
LIPID-N-0294	GP	PC	852.575	807.578	[M+COOH]-	C46H82NO8P	27985.4	56158.6	85311.4	143284	48289.1	74106.8	73237.9	80115.9	102399	74068.6	113764	73590.3	73189	141097	78553.2	154437	105913	58256.5	52033.5	66579	390414	191495	60541	61236.1	141663	233686	51398	215401	223363	94600.4	162349	165392	135126	182024	146971	222296	115435	91388.4	184095	155935	131631	104420	152697
LIPID-N-0304	GP	PC	850.56	805.562	[M+COOH]-	C46H80NO8P	178009	186722	275506	344961	260773	310553	247377	267491	449967	289841	341238	322645	334599	365810	271749	461915	403024	257110	187157	215531	763840	750319	193398	241470	366069	724175	395598	592409	628336	446600	557947	572895	475394	440641	467487	714300	485991	465485	653948	509598	507718	396386	607583
LIPID-N-0914	GP	PC	876.575	831.578	[M+COOH]-	C48H82NO8P	8215.82	6393.74	20371.8	2317.62	3496.04	18044	9925.94	12807.1	3483.69	8206.33	11092.8	18755.1	13485.5	18114.9	7594.86	35010.1	15757	8798.14	9898.36	5259.62	58412.1	36916.5	9406.01	11728.4	15761.7	33262.2	17672.3	37921	32090.2	22813.7	20580.6	70010.7	16239.6	68341.4	37339.3	42590	40834.4	32093.3	49133.4	44395.4	41604.5	42007.1	51998.9
LIPID-N-0320	GP	PC	874.56	829.562	[M+COOH]-	C48H80NO8P	34549.7	33573.4	43975.5	40227	44660.6	81280.3	44891.8	36648.7	32671.7	44011	67677.5	113748	81663.3	95200.2	50356.6	132937	76243.5	75760	31584.2	51722.2	151176	138698	49997.6	57861.4	56028.8	152996	61381.8	102890	102418	95281.7	99357.9	94818.6	69336.8	117268	89548	127957	93702.5	100319	122058	107001	107979	93002.9	113420
LIPID-N-0271	GP	PC	826.56	781.562	[M+COOH]-	C44H80NO8P	74227.9	123061	249886	65616.7	71593.7	108685	86085.3	45171.1	34876.9	108388	140293	146376	106712	200537	129092	168119	114805	64998.4	58518.4	17861.1	358111	410887	71829.9	74630.6	241350	265556	126170	235570	233489	118776	187774	307906	195750	262803	195925	247540	183285	156471	270327	213977	225801	172994	342703
LIPID-N-0222	GP	PC	846.622	801.625	[M+COOH]-	C45H88NO8P	550532	807301	905649	469755	521815	893024	655474	453068	424510	757478	748762	638003	544177	1.03077e+06	591432	1.00915e+06	506312	526722	502276	394761	1.09814e+06	1.13052e+06	524396	636088	1.06473e+06	841439	542956	1.19802e+06	961670	585218	584394	980274	818059	662549	953680	960392	562876	723315	939564	601162	668096	595653	683627
LIPID-N-0277	GP	PC	868.607	823.609	[M+COOH]-	C47H86NO8P	588623	420781	395428	880793	713845	724749	626257	778471	818896	687118	651135	683152	825878	687385	818646	729038	799239	670130	848658	795537	723207	911121	897550	861369	845295	786058	855112	732156	781278	677481	696761	784376	668551	524459	765973	766817	703562	683978	758915	632063	684068	646176	698313
LIPID-N-0295	GP	PC	880.607	835.609	[M+COOH]-	C48H86NO8P	31578.5	42876.9	42503.7	38940.1	31984.5	38006.3	36001.8	32770.4	34801.9	42073.1	42051.8	39236.5	49348.5	44933.3	59458.4	46111.6	62743.3	28386.8	42471.2	13757.9	106800	71594.6	39237.6	32362.4	48577.6	69642.6	53837.2	91093.1	56629.4	49406.8	77668.4	93938.7	46363.8	87773.6	66393.7	70857.7	71998.1	91080.2	71777.4	88186.1	43687.2	67602.4	64726
LIPID-N-0274	GP	PC	854.591	809.593	[M+COOH]-	C46H84NO8P	216839	558189	718658	903913	489668	535688	835058	741289	625769	1.00375e+06	817904	766364	663691	941615	620464	1.11607e+06	894369	707260	694354	491587	1.67539e+06	960586	743928	547359	1.36167e+06	1.21806e+06	495999	1.53161e+06	1.29031e+06	789895	923231	881556	892726	1.28671e+06	888335	1.29891e+06	757047	1.19351e+06	1.20397e+06	1.19901e+06	682434	824355	816203
LIPID-N-0316	GP	PC	876.575	831.578	[M+COOH]-	C48H82NO8P	14001.4	14876.2	16699.4	64138.7	42762.7	31984.8	21797.8	34726.6	69984.8	62847.6	28354.8	40925.8	32780.8	24023.9	20281.5	51603.1	23134.1	24499.8	16753.2	37209.4	48473.5	52006.1	23485.7	39536.6	43631.6	36026.8	17967.8	43251.6	63449	33247.1	42301.5	27539.1	30618.3	47451.6	27057.4	36739.1	27892	34264.7	46712.1	47692.7	31496.1	40754.5	33408.2
LIPID-N-0285	GP	PC	824.544	779.547	[M+COOH]-	C44H78NO8P	106939	123041	118023	383466	170095	201960	167192	280544	372129	516900	238263	608127	147755	325330	174074	366157	306988	217355	170079	213915	251897	224423	179547	259468	487910	254006	173595	261612	312186	159844	345889	306466	198702	289292	179987	402573	136207	146668	281815	171432	218822	170755	134507
LIPID-N-0273	GP	PC	840.56	795.578	[M+COOH]-	C45H82NO8P	196513	120076	118515	187131	172815	140158	115393	261547	269907	155775	161586	173110	155974	191282	205148	162997	216464	196538	168433	236309	250626	268661	224857	234758	193870	217982	260867	212123	179376	143988	281129	263669	202426	163148	196994	182126	225637	177006	221724	97609.3	169434	187182	207865
LIPID-N-0319	GP	PC	874.56	829.562	[M+COOH]-	C48H80NO8P	49040.5	19899.2	49792.4	182084	132636	67229.6	77266.9	118305	339834	159485	123288	226440	115933	73986.9	81114.5	142043	108487	77091.7	83647.1	150773	104714	106142	90543.6	100070	92150.9	130321	138244	93559.5	130078	113658	133758	80037.6	61814.2	104707	82832.7	152608	90255.6	100061	116293	89779.8	107793	97616.5	125027
LIPID-N-0292	GP	PC	852.575	807.578	[M+COOH]-	C46H82NO8P	134752	418032	421063	136668	100053	641511	217122	67886.9	83281.2	142944	209983	185360	245298	268987	363114	291378	171543	313544	126423	212272	264141	262382	186273	128947	238598	168885	222505	225833	280377	157437	417070	322683	176001	219808	221030	141510	160276	167966	203047	156347	356634	292245	128979
LIPID-N-0276	GP	PC	854.591	809.593	[M+COOH]-	C46H84NO8P	377723	430805	338835	548809	624768	569193	496440	768155	781948	990558	626820	719524	478965	794251	619849	879850	580501	617713	730146	570578	691369	684650	642017	910272	980672	560835	657707	728042	737259	669265	647500	612078	576985	565076	623281	858938	649655	596609	724411	532990	636314	612086	619583
LIPID-N-0297	GP	PC	880.607	835.609	[M+COOH]-	C48H86NO8P	20210.8	39109.3	22055	49486.9	44705.3	44972.2	54559.3	53285	44318.6	66437.9	92750.6	75645.5	43415.5	58545	53941.2	78944.6	58680.4	46402.6	73023.2	34867.5	69021.7	61791.1	66439.1	51274.7	81561.7	66391.7	42729.1	65734.8	68412.3	57885.4	69272.9	65889.7	55257.1	47331	54091	88815.1	57858.5	81512.2	76898.2	62509.6	59208.1	68417.8	50767.3
LIPID-N-0307	GP	PC	864.575	819.578	[M+COOH]-	C47H82NO8P	33099	71554.2	28921.3	76171.6	52395.1	60667.3	54965.1	72143.6	54251.1	79991.2	58842.1	86426	64362.5	79077	74474.9	120458	64410.7	95617.8	110346	68974.8	73064.4	101815	87338.1	101830	53301.2	81373.3	51490.2	68591.7	87428.3	71632.2	62449.4	63117.8	46908.9	58664.6	54059.2	58896.7	118039	59621.2	98382.1	54064.8	74471.2	62581.8	68038.8
LIPID-N-0227	GP	PC	916.701	871.703	[M+COOH]-	C50H98NO8P	20132.8	24541.2	26110.7	16997.9	16074.5	22459.9	22602.4	17762.6	27358.7	20776.7	18149.9	12896.6	20378.8	25741.5	28741.4	23879.2	19534.6	26238.4	14737.3	16514.7	25829.5	26742.9	19562.2	24629.3	32668.8	25602.8	18804.4	27239.1	26928.7	22544.9	26265.8	30630.9	27577.3	27599.1	24573.1	28217.3	23652.6	31643	31992.5	29678.8	18746.3	23976.1	16765.4
LIPID-N-0244	GP	PC	914.685	869.687	[M+COOH]-	C50H96NO8P	25149.2	26432.2	37332.6	12729	14493.1	21092.4	28464.7	20452	11277	10665.7	14845.3	8292.98	24796.8	20959.3	21683.2	20741.7	24051.1	20045.3	14994.4	11876	54394.3	52395.1	15178.6	18769.5	26796.4	50461.6	16685	49141.3	45517.5	28502.8	35898	67143.5	44266	36187.7	48757.2	35201.6	50838.2	38690.6	61164.5	44900.3	20625.8	37028.9	29046.4
LIPID-P-0531	GP	PC-O	692.559	691.552	[M+H]+	C38H78NO7P	2.41255e+06	2.95151e+06	1.87071e+06	1.57918e+06	2.591e+06	1.94528e+06	2.3236e+06	2.1858e+06	2.62965e+06	3.18956e+06	2.30753e+06	1.28959e+06	1.54047e+06	2.02524e+06	2.53133e+06	2.53594e+06	3.54015e+06	2.63127e+06	1.98459e+06	2.87544e+06	1.71316e+06	1.70694e+06	1.75741e+06	2.54043e+06	3.67899e+06	2.39555e+06	2.58189e+06	2.80757e+06	2.98714e+06	3.43215e+06	3.62389e+06	3.36858e+06	2.22705e+06	2.19642e+06	2.75105e+06	3.7136e+06	2.244e+06	3.07086e+06	2.9854e+06	3.74883e+06	1.89103e+06	3.43883e+06	2.39342e+06
LIPID-P-0536	GP	PC-O	690.544	689.536	[M+H]+	C38H76NO7P	6.46537e+06	4.35768e+06	6.14076e+06	3.11939e+06	4.26618e+06	5.17414e+06	5.35562e+06	5.20631e+06	4.80868e+06	6.45709e+06	5.63338e+06	3.23453e+06	3.96424e+06	7.16292e+06	6.85559e+06	9.07129e+06	7.10438e+06	6.88166e+06	4.39011e+06	4.3662e+06	6.30776e+06	7.60177e+06	3.67553e+06	5.70261e+06	9.65334e+06	7.1972e+06	5.18411e+06	7.83727e+06	6.68567e+06	7.33116e+06	7.54118e+06	9.22854e+06	6.87715e+06	5.79552e+06	6.21181e+06	8.43479e+06	6.64582e+06	6.60276e+06	7.48355e+06	6.31272e+06	5.4506e+06	5.75872e+06	7.2598e+06
LIPID-P-0532	GP	PC-O	720.591	719.583	[M+H]+	C40H82NO7P	4.27401e+07	5.25698e+07	4.32308e+07	4.01729e+07	5.43413e+07	4.89116e+07	4.3686e+07	4.21725e+07	6.26605e+07	7.86943e+07	5.67203e+07	3.34946e+07	3.44672e+07	5.4613e+07	6.36692e+07	7.0291e+07	5.86204e+07	4.14443e+07	4.7479e+07	6.31668e+07	4.6145e+07	5.04421e+07	3.89754e+07	5.08623e+07	8.77951e+07	4.82316e+07	4.26304e+07	4.98805e+07	6.15134e+07	6.53152e+07	4.58396e+07	4.31379e+07	4.84856e+07	3.9694e+07	4.88876e+07	7.29298e+07	3.42239e+07	5.49158e+07	4.97628e+07	4.85201e+07	3.95978e+07	4.97059e+07	4.09867e+07
LIPID-P-0537	GP	PC-O	718.575	717.567	[M+H]+	C40H80NO7P	1.54792e+07	1.12466e+07	5.88336e+06	9.71998e+06	1.20382e+07	9.63172e+06	9.13461e+06	1.01223e+07	1.2274e+07	2.24186e+07	1.2176e+07	8.0826e+06	8.71015e+06	1.09045e+07	1.29657e+07	1.47958e+07	1.31206e+07	1.61911e+07	1.04806e+07	1.55024e+07	7.98544e+06	7.63649e+06	8.34938e+06	1.29937e+07	1.59654e+07	9.43467e+06	9.9895e+06	1.05813e+07	1.06897e+07	1.25601e+07	1.54141e+07	1.50398e+07	7.56559e+06	7.4022e+06	1.39778e+07	1.61236e+07	1.10223e+07	1.02216e+07	1.40551e+07	1.55311e+07	1.16463e+07	9.3851e+06	5.28178e+06
LIPID-P-0544	GP	PC-O	744.591	743.583	[M+H]+	C42H82NO7P	1.22104e+07	1.63669e+07	1.91411e+07	1.14807e+07	1.34031e+07	1.96628e+07	1.28398e+07	1.18486e+07	1.37509e+07	1.52617e+07	2.27474e+07	8.16037e+06	9.30515e+06	2.28766e+07	1.65284e+07	2.52289e+07	2.07483e+07	1.38151e+07	1.10681e+07	1.53143e+07	2.99197e+07	2.16969e+07	8.76267e+06	1.7459e+07	2.5994e+07	2.32353e+07	1.7576e+07	2.92504e+07	2.95733e+07	2.42356e+07	2.03591e+07	2.54125e+07	2.18539e+07	1.87185e+07	2.28171e+07	2.38347e+07	1.70951e+07	1.40841e+07	2.62897e+07	2.36198e+07	1.69697e+07	1.91426e+07	1.8926e+07
LIPID-P-0554	GP	PC-O	768.591	767.583	[M+H]+	C44H82NO7P	7.48658e+07	8.28646e+07	7.78856e+07	8.59186e+07	1.27085e+08	1.11573e+08	1.08868e+08	1.30489e+08	1.30936e+08	1.86134e+08	1.28376e+08	1.02425e+08	1.05382e+08	1.27596e+08	1.65607e+08	1.55981e+08	1.52178e+08	1.24563e+08	1.3297e+08	1.40911e+08	1.1895e+08	1.11572e+08	1.16543e+08	1.29816e+08	1.61774e+08	1.48939e+08	1.31892e+08	1.15662e+08	1.49548e+08	1.61878e+08	1.26728e+08	1.04495e+08	1.08651e+08	1.09043e+08	1.03713e+08	1.61999e+08	1.10371e+08	1.37688e+08	1.35201e+08	1.32365e+08	1.16683e+08	1.35744e+08	1.09751e+08
LIPID-P-0535	GP	PC-O	804.685	803.677	[M+H]+	C46H94NO7P	1.0248e+06	904524	1.16698e+06	1.16741e+06	602338	851544	1.08845e+06	842719	1.31858e+06	926169	676196	610681	1.06116e+06	744278	794166	933229	1.19153e+06	861138	617093	845648	949683	1.86147e+06	320922	1.47511e+06	761693	1.19506e+06	819678	1.40108e+06	1.11689e+06	1.11975e+06	686425	843261	1.40303e+06	808903	1.15472e+06	803497	2568654	943150	1.00269e+06	810224	864902	1.01487e+06	1.89902e+06
LIPID-P-0543	GP	PC-O	716.559	715.552	[M+H]+	C40H78NO7P	818158	478177	674077	397467	505838	694752	511688	557021	713658	693086	744774	377657	401966	913797	849415	1.19401e+06	753142	863771	483608	614183	729050	678240	444236	837800	1.04013e+06	705182	530470	818585	662338	668746	888817	862940	687709	585881	555963	840901	635021	743050	818475	695608	570647	618547	692012
LIPID-P-0549	GP	PC-O	742.575	741.567	[M+H]+	C42H80NO7P	1.92332e+07	1.94929e+07	3.20369e+07	1.53394e+07	2.15925e+07	2.75771e+07	2.25607e+07	1.65182e+07	1.49576e+07	1.97032e+07	3.51308e+07	6.77976e+06	1.34846e+07	3.28817e+07	2.92375e+07	5.25524e+07	3.39474e+07	2.64858e+07	2.19029e+07	1.38379e+07	3.95559e+07	2.60159e+07	1.07901e+07	2.89093e+07	2.69179e+07	4.01263e+07	3.04922e+07	3.55595e+07	3.79845e+07	4.13613e+07	3.24657e+07	3.93256e+07	3.16119e+07	3.24215e+07	3.06932e+07	3.09279e+07	3.27805e+07	2.37596e+07	3.92446e+07	4.96334e+07	2.35011e+07	2.7495e+07	3.21085e+07
LIPID-P-0559	GP	PC-O	766.575	765.567	[M+H]+	C44H80NO7P	8.94359e+07	7.8359e+07	8.87314e+07	9.58615e+07	1.20456e+08	1.01581e+08	1.24327e+08	9.43085e+07	9.99167e+07	1.53367e+08	1.40326e+08	7.87514e+07	1.05346e+08	1.36333e+08	1.58304e+08	1.78775e+08	1.32613e+08	1.37367e+08	1.18889e+08	9.04126e+07	1.24353e+08	1.21067e+08	8.45533e+07	136625430	1.44689e+08	1.61565e+08	1.50741e+08	1.18189e+08	1.48052e+08	1.48137e+08	1.33936e+08	1.27366e+08	1.37306e+08	1.38563e+08	1.09398e+08	1.66199e+08	1.36149e+08	1.66851e+08	1.40827e+08	1.84074e+08	1.11398e+08	1.30299e+08	1.15117e+08
LIPID-P-0564	GP	PC-O	764.559	763.552	[M+H]+	C44H78NO7P	1.37635e+06	4.87465e+06	3.58897e+06	669549	914548	4.63004e+06	987729	714776	836159	1.38933e+06	1.52433e+06	500256	1.06122e+06	1.15347e+06	1.51783e+06	2.0812e+06	1.26104e+06	1.82617e+06	831768	983936	1.59762e+06	707508	808280	993032	1.19534e+06	1.49891e+06	2.51796e+06	1.10205e+06	1.66065e+06	1.25105e+06	2.03466e+06	1.59476e+06	1.04472e+06	1.39006e+06	1.09763e+06	1.45071e+06	1.33785e+06	1.48785e+06	1.22625e+06	2.22227e+06	2.53181e+06	1.54069e+06	1.12879e+06
LIPID-P-0568	GP	PC-O	790.575	789.567	[M+H]+	C46H80NO7P	7.55526e+06	5.98847e+06	6.9744e+06	9.61868e+06	1.1683e+07	9.8671e+06	1.13533e+07	9.48594e+06	8.21007e+06	1.78967e+07	1.46304e+07	8.18982e+06	1.14704e+07	1.36795e+07	1.87309e+07	2.16722e+07	1.13392e+07	2.0166e+07	1.45439e+07	1.21626e+07	1.12038e+07	1.06867e+07	9.98098e+06	1.64743e+07	1.15369e+07	1.43443e+07	1.47366e+07	1.01397e+07	1.50045e+07	1.54222e+07	1.46822e+07	1.23419e+07	1.13885e+07	1.41127e+07	8.48477e+06	1.21962e+07	1.34907e+07	1.71649e+07	1.26861e+07	1.81444e+07	8.66053e+06	1.29049e+07	7.66013e+06
LIPID-P-0533	GP	PC-O	748.622	747.614	[M+H]+	C42H86NO7P	5.53451e+06	6.67221e+06	5.627e+06	5.41316e+06	7.15025e+06	5.52529e+06	5.87627e+06	6.02463e+06	8.36929e+06	9.8705e+06	7.6863e+06	6.75284e+06	4.4793e+06	7.29093e+06	8.04955e+06	9.11289e+06	6.11421e+06	6.4919e+06	5.52387e+06	8.94153e+06	5.43968e+06	6.99178e+06	4.80043e+06	6.86081e+06	1.29195e+07	5.87411e+06	5.57906e+06	6.42436e+06	7.45017e+06	7.55234e+06	6.31539e+06	5.41618e+06	5.95524e+06	5.28747e+06	6.74461e+06	8.31076e+06	5.2936e+06	9.84384e+06	6.36626e+06	6.13638e+06	4.69181e+06	6.56616e+06	4.87705e+06
LIPID-P-0545	GP	PC-O	772.622	771.614	[M+H]+	C44H86NO7P	6.12643e+06	8.73328e+06	9.96882e+06	5.48863e+06	5.99988e+06	8.9358e+06	6.9519e+06	5.33025e+06	8.13238e+06	1.05028e+07	8.47191e+06	3.93019e+06	5.43433e+06	9.64609e+06	8.24652e+06	9.49034e+06	8.88063e+06	6.40576e+06	6.42716e+06	6.67056e+06	9.83873e+06	1.03388e+07	5.71958e+06	6.76428e+06	1.08235e+07	9.48573e+06	6.38337e+06	1.0708e+07	1.22997e+07	8.95358e+06	1.20995e+07	1.1956e+07	8.68238e+06	1.14017e+07	1.08646e+07	1.27187e+07	7.63596e+06	1.4639e+07	1.16287e+07	1.14008e+07	6.9306e+06	7.58517e+06	7.37153e+06
LIPID-P-0551	GP	PC-O	798.638	797.63	[M+H]+	C46H88NO7P	2.23597e+06	2.62327e+06	2.66358e+06	3.19973e+06	4.01461e+06	3.61968e+06	3.66823e+06	5.26376e+06	4.41645e+06	1.00183e+07	4.5728e+06	2.41723e+06	3.32359e+06	4.47456e+06	3.68452e+06	4.68875e+06	4.31752e+06	4.46203e+06	5.02206e+06	7.8513e+06	3.4523e+06	3.59257e+06	4.48764e+06	4.51741e+06	7.11909e+06	3.96837e+06	4.18584e+06	3.9545e+06	6.80936e+06	5.38791e+06	3.23688e+06	2.65863e+06	2.4141e+06	3.3605e+06	3.89204e+06	5.56061e+06	3.21112e+06	6.20302e+06	3.8242e+06	4.18781e+06	2.67432e+06	3.1415e+06	3.0395e+06
LIPID-P-0555	GP	PC-O	796.622	795.614	[M+H]+	C46H86NO7P	2.85327e+07	2.67987e+07	2.91916e+07	3.46867e+07	4.55797e+07	3.69857e+07	3.88563e+07	4.65611e+07	5.09492e+07	8.52307e+07	4.46305e+07	3.83617e+07	3.44438e+07	5.48336e+07	6.28389e+07	5.54017e+07	5.61407e+07	4.8075e+07	4.44292e+07	6.62009e+07	4.00519e+07	4.55941e+07	3.99266e+07	4.96968e+07	7.30768e+07	5.33817e+07	4.31145e+07	4.35458e+07	5.71226e+07	5.67908e+07	4.30397e+07	3.66788e+07	3.3883e+07	3.76223e+07	4.12116e+07	6.67832e+07	3.8541e+07	6.39136e+07	5.39057e+07	4.28239e+07	3.18259e+07	4.75989e+07	3.99235e+07
LIPID-P-0566	GP	PC-O	820.622	819.614	[M+H]+	C48H86NO7P	4.61122e+06	5.44347e+06	6.14832e+06	5.70299e+06	6.51221e+06	9.19213e+06	6.48939e+06	6.63714e+06	6.06363e+06	1.79753e+07	1.27279e+07	7.54237e+06	6.32085e+06	1.54454e+07	1.18463e+07	1.80768e+07	9.40276e+06	1.35751e+07	9.07789e+06	1.34261e+07	1.53659e+07	1.45318e+07	7.84514e+06	1.08477e+07	1.4546e+07	1.32178e+07	8.56253e+06	1.53426e+07	1.41983e+07	1.103e+07	8.24021e+06	1.03355e+07	9.00033e+06	7.66793e+06	1.06188e+07	1.43595e+07	8.84073e+06	1.27225e+07	1.474e+07	8.98072e+06	9.66673e+06	1.03329e+07	7.89001e+06
LIPID-P-0542	GP	PC-O	858.732	857.724	[M+H]+	C50H100NO7P	401174	319027	419838	164677	255193	416063	317078	242926	343464	340834	288423	141911	202820	444414	323644	258508	340451	230937	195402	335351	278931	390862	230498	268786	311062	342258	227676	337312	346410	276923	314140	236046	332745	280052	422863	203114	275255	428153	254736	240249	212615	245795	201847
LIPID-P-0538	GP	PC-O	746.606	745.599	[M+H]+	C42H84NO7P	4.93491e+07	7.17299e+07	6.9301e+07	4.73486e+07	6.03447e+07	6.87705e+07	5.59686e+07	4.95177e+07	6.53211e+07	8.93804e+07	6.99388e+07	3.59541e+07	5.10134e+07	7.47745e+07	8.05232e+07	8.26286e+07	7.20318e+07	5.35058e+07	5.79944e+07	5.31375e+07	7.91711e+07	7.76825e+07	5.32768e+07	5.96514e+07	1.05012e+08	6.87861e+07	5.51285e+07	9.34217e+07	9.28358e+07	8.82951e+07	9.47176e+07	8.09711e+07	6.81668e+07	8.92732e+07	8.12376e+07	1.02012e+08	6.35109e+07	1.11432e+08	8.24409e+07	8.47876e+07	6.01222e+07	7.18538e+07	6.1427e+07
LIPID-P-0550	GP	PC-O	770.606	769.599	[M+H]+	C44H84NO7P	4.72751e+06	5.02397e+06	5.60152e+06	5.65764e+06	8.07598e+06	6.40111e+06	7.66831e+06	1.34251e+07	8.65423e+06	1.437e+07	9.0299e+06	5.53309e+06	6.95392e+06	7.60729e+06	7.61158e+06	8.91018e+06	1.05881e+07	8.0867e+06	9.66014e+06	1.68706e+07	7.20919e+06	5.78476e+06	9.42331e+06	8.4592e+06	1.30504e+07	7.57167e+06	7.83697e+06	7.21222e+06	1.06774e+07	1.10987e+07	6.55546e+06	4.68554e+06	5.09105e+06	7.72632e+06	5.68373e+06	1.0411e+07	7.19684e+06	7.53411e+06	7.00132e+06	9.04656e+06	5.42182e+06	7.12166e+06	5.75804e+06
LIPID-P-0546	GP	PC-O	800.653	799.645	[M+H]+	C46H90NO7P	4.77806e+06	3.84019e+06	6.18835e+06	2.99473e+06	3.8024e+06	4.31725e+06	4.31279e+06	3.72652e+06	5.11857e+06	5.13314e+06	4.84198e+06	2.38241e+06	3.71281e+06	6.0877e+06	5.48828e+06	6.96728e+06	6.12723e+06	4.71685e+06	3.92153e+06	3.73867e+06	4.91685e+06	5.31286e+06	3.33871e+06	5.58829e+06	8.6091e+06	5.31189e+06	3.97017e+06	5.9437e+06	6.0677e+06	5.7902e+06	5.51478e+06	5.8577e+06	4.98902e+06	4.29245e+06	4.87225e+06	6.03813e+06	5.26708e+06	7.81222e+06	6.23989e+06	5.89702e+06	3.57611e+06	4.93751e+06	6.62521e+06
LIPID-P-0560	GP	PC-O	794.606	793.599	[M+H]+	C46H84NO7P	3.14458e+07	4.32702e+07	3.95194e+07	5.29025e+07	5.80967e+07	6.36858e+07	5.2871e+07	5.25115e+07	7.36123e+07	9.23728e+07	7.20193e+07	5.0338e+07	5.47352e+07	6.06461e+07	7.70335e+07	7.75743e+07	7.21031e+07	6.13256e+07	6.26033e+07	6.45421e+07	7.06208e+07	6.45643e+07	5.76108e+07	6.0789e+07	8.40156e+07	7.8552e+07	6.70885e+07	6.66334e+07	8.09577e+07	8.46492e+07	8.65102e+07	6.75947e+07	4.97212e+07	7.55944e+07	5.98656e+07	9.14244e+07	6.48601e+07	1.12704e+08	7.83898e+07	8.27693e+07	5.62549e+07	7.012e+07	6.01186e+07
LIPID-P-0541	GP	PC-O	830.7	829.692	[M+H]+	C48H96NO7P	2.98401e+06	2.21272e+06	2.61228e+06	1.44302e+06	1.81716e+06	2.60671e+06	2.03265e+06	2.35162e+06	2.2741e+06	2.73865e+06	2.44581e+06	1.48082e+06	1.80472e+06	3.28283e+06	3.00097e+06	2.48218e+06	3.10265e+06	3.33126e+06	1.53572e+06	2.32114e+06	2.29895e+06	3.3941e+06	1.60859e+06	2.96467e+06	2.74503e+06	2.35119e+06	2.20649e+06	2.53248e+06	2.68085e+06	2.55427e+06	3.0872e+06	2.9158e+06	2.88531e+06	1.9164e+06	3.01945e+06	2.22303e+06	3.27387e+06	2.74112e+06	2.64449e+06	2.45425e+06	2.03533e+06	2.05245e+06	2.47303e+06
LIPID-P-0547	GP	PC-O	828.685	827.677	[M+H]+	C48H94NO7P	1.07423e+06	1.2482e+06	885790	733708	870840	957470	881228	777341	1.10383e+06	1.41002e+06	1.14517e+06	616731	775630	1.262e+06	1.08848e+06	1.22047e+06	1.18881e+06	1.00017e+06	985487	1.47012e+06	694823	1.11468e+06	547181	1.26729e+06	1.23017e+06	1.35601e+06	827723	1.04834e+06	1.07862e+06	1.0602e+06	1.28123e+06	757898	1.55331e+06	1.01948e+06	1.28049e+06	1.28517e+06	1.24848e+06	1.43774e+06	1.12031e+06	1.20386e+06	804331	1.00811e+06	1.08901e+06
LIPID-P-0569	GP	PC-O	818.606	817.599	[M+H]+	C48H84NO7P	4.65e+06	6.37521e+06	5.52793e+06	7.4821e+06	9.74024e+06	9.79704e+06	8.7917e+06	7.24097e+06	8.67814e+06	1.67018e+07	1.33624e+07	8.28586e+06	9.90424e+06	1.02531e+07	1.53793e+07	1.56813e+07	1.13708e+07	1.41472e+07	1.2256e+07	1.18951e+07	1.27382e+07	1.24099e+07	1.10873e+07	1.1112e+07	1.08799e+07	1.45629e+07	8.77233e+06	1.07034e+07	1.38648e+07	1.83923e+07	1.62059e+07	1.29454e+07	8.53021e+06	1.45493e+07	9.02209e+06	1.31873e+07	1.35237e+07	2.38782e+07	1.52245e+07	1.37526e+07	9.73767e+06	1.28536e+07	1.0298e+07
LIPID-P-0548	GP	PC-O	856.716	855.708	[M+H]+	C50H98NO7P	559519	654820	989691	385174	551083	686571	573229	432103	607691	866371	676117	466692	521378	738522	570416	516391	704802	414230	483296	736064	769030	806612	344509	519197	720984	399750	490047	511414	695005	721358	700839	732631	790230	639215	1.05459e+06	555579	373081	1.11451e+06	443504	589410	364919	750910	723428
LIPID-P-0565	GP	PC-O	792.591	791.583	[M+H]+	C46H82NO7P	2.37435e+07	2.56745e+07	2.35166e+07	2.72914e+07	3.75644e+07	3.92023e+07	3.50497e+07	2.93945e+07	2.86515e+07	6.01538e+07	4.5566e+07	2.81128e+07	3.51948e+07	4.43602e+07	5.79362e+07	6.48229e+07	4.39998e+07	5.28214e+07	4.50166e+07	4.26062e+07	4.19103e+07	4.17771e+07	3.45128e+07	4.30923e+07	4.41624e+07	5.33126e+07	4.42828e+07	3.73189e+07	5.38572e+07	6.20014e+07	4.62134e+07	4.53699e+07	3.7624e+07	3.95778e+07	3.09011e+07	4.83091e+07	4.33471e+07	6.50253e+07	4.52526e+07	5.46326e+07	3.33887e+07	4.54568e+07	3.34531e+07
LIPID-P-0556	GP	PC-O	824.653	823.645	[M+H]+	C48H90NO7P	1.84058e+06	1.85802e+06	1.70656e+06	2.16912e+06	2.45605e+06	2.49049e+06	2.2075e+06	2.75531e+06	3.16579e+06	4.35658e+06	3.79948e+06	1.62534e+06	1.90323e+06	3.62116e+06	2.62994e+06	3.76212e+06	2.40521e+06	2.52814e+06	2.57832e+06	2.83076e+06	2.9556e+06	3.14458e+06	2.03273e+06	3.34519e+06	4.14526e+06	2.86252e+06	2.74656e+06	3.31566e+06	4.75411e+06	3.52658e+06	2.95202e+06	2.45875e+06	2.49355e+06	2.31519e+06	3.23057e+06	4.13805e+06	2.50776e+06	3.32634e+06	3.10206e+06	3.03386e+06	2.29795e+06	2.20191e+06	1.95172e+06
LIPID-P-0557	GP	PC-O	852.685	851.677	[M+H]+	C50H94NO7P	510804	446846	531056	543698	744964	572319	662015	686232	758106	1.18809e+06	702155	346210	911214	780710	697570	582466	1.00809e+06	633234	840220	980045	598853	795677	637661	771160	710916	763232	786537	790445	869297	817863	780847	465436	564458	688861	767573	909401	661919	1.41782e+06	865900	630348	490109	752186	999134
LIPID-P-0561	GP	PC-O	822.638	821.63	[M+H]+	C48H88NO7P	2.71558e+06	3.5181e+06	3.00452e+06	3.49414e+06	4.39977e+06	5.32611e+06	3.42865e+06	4.0957e+06	5.10518e+06	8.2893e+06	5.65317e+06	2.94825e+06	3.82538e+06	5.46147e+06	4.93242e+06	5.68462e+06	5.26148e+06	4.69125e+06	5.19572e+06	6.16046e+06	5.2599e+06	5.51115e+06	3.65217e+06	4.97916e+06	7.2116e+06	4.78562e+06	5.29407e+06	4.83305e+06	6.94472e+06	5.35809e+06	4.6663e+06	4.15123e+06	3.13172e+06	3.38223e+06	4.65021e+06	6.49472e+06	3.85719e+06	7.57128e+06	5.42176e+06	4.2929e+06	3.18277e+06	4.25811e+06	5.01521e+06
LIPID-P-0562	GP	PC-O	850.669	849.661	[M+H]+	C50H92NO7P	2.93915e+06	2.62901e+06	3.24221e+06	3.26068e+06	5.0489e+06	3.65662e+06	4.38891e+06	4.04392e+06	5.24396e+06	8.83911e+06	4.79553e+06	2.43644e+06	5.96423e+06	5.17248e+06	4.30859e+06	3.48293e+06	6.9135e+06	4.13903e+06	5.65323e+06	7.00403e+06	3.37725e+06	4.30472e+06	4.07112e+06	5.11824e+06	4.99434e+06	4.3734e+06	4.85928e+06	4.65249e+06	5.259e+06	5.6977e+06	4.79955e+06	2.50321e+06	3.43963e+06	4.36047e+06	4.93582e+06	6.14039e+06	4.03382e+06	1.0071e+07	5.34753e+06	4.13892e+06	3.21724e+06	4.81783e+06	7.15934e+06
LIPID-P-0567	GP	PC-O	848.653	847.645	[M+H]+	C50H90NO7P	1.67939e+06	1.05147e+06	1.55557e+06	1.97744e+06	2.69774e+06	2.11351e+06	1.95966e+06	2.31556e+06	2.81106e+06	3.56996e+06	2.71546e+06	1.4325e+06	1.89625e+06	3.04874e+06	3.12487e+06	2.96634e+06	4.07299e+06	2.16743e+06	2.56968e+06	4.01156e+06	1.72331e+06	2.04982e+06	1.51032e+06	3.13548e+06	3.22466e+06	2.8699e+06	2.27711e+06	2.59182e+06	2.94966e+06	3.15651e+06	3.11783e+06	1.82312e+06	1.76167e+06	2.16312e+06	1.87798e+06	3.88118e+06	3.24233e+06	3.24106e+06	3.33591e+06	2.98589e+06	1.47736e+06	3.38966e+06	4.0429e+06
LIPID-P-0558	GP	PC-O	880.716	879.708	[M+H]+	C52H98NO7P	1.07009e+06	956656	1.20772e+06	1.03656e+06	1.07064e+06	887630	1.36528e+06	1.21388e+06	1.58751e+06	2.54655e+06	1.61501e+06	1.09669e+06	1.40744e+06	1.68869e+06	2.09263e+06	1.37767e+06	1.82032e+06	1.45291e+06	1.28982e+06	2.4792e+06	1.2655e+06	1.77342e+06	1.27351e+06	1.59969e+06	1.77049e+06	1.67979e+06	1.32432e+06	1.46066e+06	1.24964e+06	1.89615e+06	1.72434e+06	1.11104e+06	1.41391e+06	1.42085e+06	1.47565e+06	1.69613e+06	1.5138e+06	1.81321e+06	1.54499e+06	1.37826e+06	1.07198e+06	1.58124e+06	1.4126e+06
LIPID-P-0563	GP	PC-O	878.7	877.692	[M+H]+	C52H96NO7P	4.82767e+06	3.11832e+06	4.67582e+06	6.02253e+06	7.23691e+06	5.64081e+06	7.42045e+06	5.39302e+06	8.94175e+06	1.42691e+07	8.29283e+06	4.53477e+06	1.00357e+07	7.9219e+06	7.60043e+06	6.02132e+06	1.08772e+07	7.00115e+06	8.6929e+06	1.25015e+07	5.49173e+06	7.29488e+06	7.13474e+06	8.35476e+06	8.28321e+06	7.20661e+06	8.38477e+06	7.43082e+06	6.97031e+06	9.53513e+06	9.13161e+06	4.05606e+06	5.23164e+06	7.82511e+06	7.78974e+06	9.38935e+06	7.24896e+06	1.67643e+07	8.06364e+06	7.52126e+06	5.09952e+06	8.7168e+06	9.15495e+06
LIPID-N-1048	GP	PE	606.413	607.421	[M-H]-	C31H62NO8P	278807	988706	366058	126192	202660	369777	142264	134330	203882	50096	87770	96965.4	102568	185706	119280	127190	184952	77253.9	100997	118690	91580.5	139870	71712	105952	73566	138043	65470.8	80562	69817	84520.6	48990.7	93106.6	367343	79417.6	133072	73102.4	65588.8	142849	69310.1	54598.9	156794	51050.5	149584
LIPID-N-1052	GP	PE	632.429	633.437	[M-H]-	C33H64NO8P	83940.3	119930	42968.9	18471	27829.7	51801.6	23089.1	23657.9	34670.3	6989.96	6211.6	12018.8	6553.57	34282.8	15170.4	18534.9	24653.2	10459.2	13901.7	15068	9892.55	18440.5	7540.07	16989.7	8270.64	13340.2	5877.36	9892.55	8298.89	8836.84	3767.82	11754	60201.5	5940.38	16465	4758.75	5594.96	10765.4	7164.26	4390.27	24284.5	7423.52	24060.9
LIPID-N-1051	GP	PE	648.46	649.468	[M-H]-	C34H68NO8P	55418.9	55785.2	62815.3	53642.4	52490.3	53868.9	52387.8	58622.4	51840.1	44380.6	51434.7	54955.6	51074.7	52139.6	51748.9	50169.4	52737.3	51425.8	51254.2	52917.9	55916.5	58498.6	49695.1	44555.7	56030.4	54425.4	55494.6	54053.1	50323.8	50914.2	53216.9	55047.6	53108.2	56893.7	52574	43659.4	50790.8	54858.1	53696.1	55573.8	58183.2	53852.3	51008
LIPID-N-1053	GP	PE	646.445	647.453	[M-H]-	C34H66NO8P	1.34191e+06	836366	1.23596e+06	1.40055e+06	1.21527e+06	1.12306e+06	1.28951e+06	1.29292e+06	1.21763e+06	1.10735e+06	1.33017e+06	1.33249e+06	1.24173e+06	1.18314e+06	1.3122e+06	1.4057e+06	1.27308e+06	1.42217e+06	1.31297e+06	1.36298e+06	1.33101e+06	1.38049e+06	1.35831e+06	1.25708e+06	1.31055e+06	1.30137e+06	1.35411e+06	1.32478e+06	1.26617e+06	1.33461e+06	1.49366e+06	1.29769e+06	1.1637e+06	1.3647e+06	1.35066e+06	1.25545e+06	1.33322e+06	1.32573e+06	1.28166e+06	1.4222e+06	1.34887e+06	1.39756e+06	1.30621e+06
LIPID-N-1054	GP	PE	660.46	661.468	[M-H]-	C35H68NO8P	63056.7	55274.9	58570.2	78297.2	66643.1	60821.1	74500.6	69917.3	63174.6	61819.6	60886.4	69055.8	61907.9	58581.5	72489.8	78297.5	69296.6	77490.5	68789.2	67888.8	72199.1	68323.7	64684.2	73829.9	68657	66324.8	63698.4	73573.1	64865.7	70057.5	75353.5	67277.6	58052.4	69867.6	68782.9	64432.4	71662.3	71431.2	59374.3	71099.1	67679.2	77676.5	72436.7
LIPID-N-1050	GP	PE	634.445	635.453	[M-H]-	C33H66NO8P	3.32662e+06	3.22142e+06	2.81651e+06	4.29125e+06	3.35115e+06	3.16269e+06	3.06922e+06	3.6957e+06	3.57704e+06	3.9024e+06	3.87881e+06	3.27392e+06	4.02412e+06	2.44362e+06	4.85731e+06	3.62257e+06	3.65963e+06	2.8696e+06	3.08563e+06	3.609e+06	3.52489e+06	4.12194e+06	3.541e+06	3.62207e+06	3.69821e+06	3.46534e+06	3.80937e+06	4.12566e+06	3.42883e+06	3.45885e+06	2.94515e+06	3.3863e+06	4.01227e+06	3.57365e+06	3.19617e+06	2.93803e+06	3.91086e+06	3.62368e+06	4.16373e+06	3.46622e+06	4.00549e+06	3.02069e+06	3.61462e+06
LIPID-N-1058	GP	PE	686.476	687.484	[M-H]-	C37H70NO8P	32932	35962.3	33620.6	45634.9	37612.5	37788.3	44894.7	41900.5	41751.7	44453.6	42879.1	39863.2	44175.5	37194.4	39614.4	38456.1	41423.2	47020.6	42443.5	42984.4	33774.1	37233.9	43889.5	41375.9	44714.6	40488.3	42387	37360.1	37629.5	43486	43007.3	38002.7	37904.2	44013.4	37660.9	38646.6	43132.9	42455.2	39675.9	46516	37453.6	42769.3	40619.8
LIPID-N-1073	GP	PE	696.46	697.468	[M-H]-	C38H68NO8P	595455	607429	616278	706784	576095	587640	621992	674160	621513	654444	686845	643930	702382	594050	681001	614942	630130	669258	650975	632783	655205	622753	642793	641473	653637	621845	667645	602789	606941	648254	635144	622115	637595	676655	617704	620112	664782	662722	640332	668470	657134	644670	663700
LIPID-N-1084	GP	PE	694.445	695.453	[M-H]-	C38H66NO8P	1.24682e+07	1.32861e+07	1.33149e+07	1.4303e+07	1.28646e+07	1.29494e+07	1.36028e+07	1.43713e+07	1.3464e+07	1.41529e+07	1.49261e+07	1.43602e+07	1.48732e+07	1.27538e+07	1.38971e+07	1.38007e+07	1.36977e+07	1.43123e+07	1.37252e+07	1.37438e+07	1.4184e+07	1.2934e+07	1.37699e+07	1.26615e+07	1.42507e+07	1.39158e+07	1.47672e+07	1.3199e+07	1.33545e+07	1.40759e+07	1.39322e+07	1.34138e+07	1.31224e+07	1.4554e+07	1.36545e+07	1.31669e+07	1.42733e+07	1.48169e+07	1.37967e+07	1.42808e+07	1.45052e+07	1.41898e+07	1.39828e+07
LIPID-N-1060	GP	PE	714.507	715.515	[M-H]-	C39H74NO8P	77657.9	66577.4	65067.7	19879.5	7013.76	30986.1	39843.3	31431.7	21762	26220.2	26548.9	19230.2	14365.8	33781.2	20403.2	53529.9	44567.3	26221.4	19309.7	11925.6	88539.6	70168.8	13535.6	35084.3	53566.5	100932	29031.9	159844	86438.1	57033.8	139957	179334	60918.5	41041.8	54889.6	90955.9	95182.2	50020.3	89515.8	92519.1	73975.9	76782.1	56022.8
LIPID-N-1059	GP	PE	700.492	701.5	[M-H]-	C38H72NO8P	68573.1	112624	168297	4365.9	28537.7	393706	34883.3	19212	2883.09	139583	284654	85114.8	6747.67	320643	16892.6	339210	41728.6	47783.7	4863.59	13524.6	367945	358657	23573.8	191160	327981	276323	154191	510163	400567	79737.3	64709.8	301200	143217	22683.9	223274	356259	17248.5	86575.5	310825	27026	361106	59932.8	122558
LIPID-N-0323	GP	PE	690.507	691.515	[M-H]-	C37H74NO8P	24968.1	50860.5	49206.9	38508.2	37942.4	60372.4	32452.8	43009.9	109294	29389.4	26882.8	68226.4	16995.2	45988.6	25639.5	50446.3	34951.4	31145.8	29775.2	66217.9	50861.6	46725.9	19390.2	39696	42858.4	49922.3	25640.6	58417.9	59121	44998.3	26467.9	70295.4	26630.9	40520.2	59549.1	48792.6	25640.6	25229	49328.8	32321.7	61197.6	33590.5	67268.2
LIPID-N-0334	GP	PE	716.523	717.531	[M-H]-	C39H76NO8P	587787	1.35564e+06	1.84211e+06	354197	449137	2.84192e+06	552030	539513	781360	1.02128e+06	1.73634e+06	1.57974e+06	321922	2.36309e+06	326818	2.49859e+06	365204	445221	341970	412834	3.04091e+06	2.81487e+06	312825	1.23842e+06	1.7897e+06	1.71894e+06	844791	3.3111e+06	2.57377e+06	782174	505705	2.89718e+06	1.37076e+06	907727	2.55473e+06	2.80408e+06	978506	683401	2.80213e+06	890882	2.30132e+06	1.05142e+06	1.28075e+06
LIPID-N-0383	GP	PE	738.507	739.515	[M-H]-	C41H74NO8P	416457	657391	838000	1.4191e+06	797864	1.63815e+06	1.51766e+06	1.21649e+06	933073	2.7238e+06	2.02656e+06	3.36568e+06	1.49043e+06	1.83039e+06	1.19047e+06	2.87091e+06	1.22122e+06	1.89541e+06	1.23124e+06	1.38165e+06	2.87085e+06	2.04007e+06	825391	1.64512e+06	2.34212e+06	1.79149e+06	1.86435e+06	2.25588e+06	3.1096e+06	1.80682e+06	1.67425e+06	2.91986e+06	886079	2.01269e+06	2.32414e+06	2.96562e+06	2.23555e+06	1.41498e+06	2.36236e+06	2.03049e+06	2.15595e+06	3.08511e+06	3.7228e+06
LIPID-N-0389	GP	PE	766.539	767.547	[M-H]-	C43H78NO8P	78326.8	119175	46476.2	85629	103293	98120.1	101997	155820	199231	169594	222155	339324	41749.7	94739.7	78725.6	117489	52860.2	101099	72361.5	149741	120083	142843	58514.5	133377	170452	120065	66718.7	173880	174700	127917	87328.9	169134	112400	134292	253746	149351	102846	87365.1	131663	68432.4	295371	121897	258762
LIPID-N-0336	GP	PE	730.54	731.547	[M-H]-	C40H78NO8P	138363	245672	184552	149551	188505	252756	227526	195317	261629	330002	230679	138458	142335	260678	219844	304752	268030	205175	183237	169342	253583	216970	157926	194949	249927	212137	227599	293409	331104	201471	226971	228327	195481	223161	293793	382250	129632	210806	246334	209384	212326	166351	171446
LIPID-N-0386	GP	PE	752.524	753.531	[M-H]-	C42H76NO8P	255315	325116	364094	274075	446235	566855	491535	499653	470415	821013	466904	359298	428139	492948	631076	539409	554985	518548	567548	482810	368007	482952	533106	611064	845566	639213	528323	390133	527511	812046	587940	615894	314028	491073	523578	646708	387809	582063	568921	427533	450578	593856	597918
LIPID-N-0414	GP	PE	776.52	777.531	[M-H]-	C44H76NO8P	13254.3	24073.3	30711.7	19642	57778.8	54783.4	39011	43751.4	29882	72206.5	50168.1	50626.1	32155.3	44713.2	83627	79487.5	62929.8	77579.5	37259.7	51111	78013.1	84661.3	32979.3	34776.7	70381	52014.3	34782.3	39844.2	71389.5	71278.4	64583.9	83834.5	45398	33964.9	38916.1	47317.6	48019.3	45396.8	69543.3	49798.9	48138.5	49682.7	56446.4
LIPID-N-0353	GP	PE	742.539	743.547	[M-H]-	C41H78NO8P	709824	1.58836e+06	2.61051e+06	435694	842344	3.60317e+06	1.35438e+06	775803	190285	1.18117e+06	2.41198e+06	1.91904e+06	1.08067e+06	2.74542e+06	778160	2.98975e+06	1.21621e+06	1.0693e+06	676371	529672	5.11514e+06	3.87662e+06	681158	1.68084e+06	2.23037e+06	3.14763e+06	1.75254e+06	4.06417e+06	4.09931e+06	1.63164e+06	1.06946e+06	4.8227e+06	1.87334e+06	1.87711e+06	3.43617e+06	3.52894e+06	2.52788e+06	1.70024e+06	3.96827e+06	2.06731e+06	3.62415e+06	2.8133e+06	3.57642e+06
LIPID-N-0392	GP	PE	794.57	795.578	[M-H]-	C45H82NO8P	18923	35800.7	26012.3	28321.8	25157.4	57171.4	23191.7	43420.9	25933.4	44985.8	98772.3	127996	14458	44922.6	19457.9	58466.4	21055.2	26890.6	26504	36131.7	67433.1	66568.1	20414.6	52663.5	65453.5	39068.1	39123.9	63841.2	70656	21790.1	17421.6	55131.2	29668.3	35362.5	89848.1	65451.3	47716.7	28052.7	64116.4	19890	81572.4	25387.7	62931.6
LIPID-N-0352	GP	PE	742.539	743.547	[M-H]-	C41H78NO8P	221375	377043	1.5466e+06	118380	410865	644435	388277	377075	118326	323228	547353	650294	439928	597731	392750	729062	496608	438803	324280	94062.8	1.91497e+06	1.81129e+06	403556	323621	509312	1.41083e+06	515192	2.20184e+06	1.98811e+06	986485	798510	3.07466e+06	658801	2.15732e+06	1.77179e+06	1.60929e+06	1.75653e+06	1.52856e+06	2.26281e+06	1.62632e+06	1.50173e+06	1.77675e+06	3.98336e+06
LIPID-N-0368	GP	PE	740.523	741.531	[M-H]-	C41H76NO8P	889631	1.35691e+06	5.14179e+06	415306	1.52615e+06	3.53198e+06	2.13902e+06	949178	300534	2.12849e+06	2.47321e+06	3.04316e+06	2.01342e+06	3.51996e+06	1.9439e+06	4.37855e+06	2.77343e+06	1.57116e+06	1.12612e+06	298086	1.20724e+07	8.4227e+06	1.18976e+06	1.23859e+06	3.99801e+06	6.99788e+06	1.95989e+06	6.9621e+06	6.94634e+06	3.77161e+06	3.10797e+06	1.13077e+07	3.71226e+06	7.17067e+06	6.28304e+06	8.81777e+06	5.67628e+06	6.6362e+06	8.74663e+06	5.47619e+06	5.5294e+06	7.47089e+06	1.02661e+07
LIPID-N-0388	GP	PE	766.539	767.547	[M-H]-	C43H78NO8P	2407.72	9121.97	20967.3	33250	11738.6	17910.1	31493.2	30215.7	9268.78	41991.7	43336.8	81116.6	35148.3	30405.4	10510.8	43283.1	26217.5	28438.2	33157.8	30009.1	126159	36759.8	24106.5	18613.9	80654.2	54261.9	56066	58311.7	108404	38406.4	48097	72759.9	22258.1	91874.7	54647.2	70293	47161.2	53861.4	81081	48113.2	46252.3	70910.9	65368.3
LIPID-N-0399	GP	PE	764.523	765.531	[M-H]-	C43H76NO8P	13676.8	8164.81	23595.9	38743.5	22695	48160.1	59932.8	33625.5	17279	68140	58063.4	97898	48063.3	52637	48193.7	90851	42643.7	36291.3	38051	22648.3	146687	78926.4	28133.5	29092.6	80702.8	70550.1	88139.6	88976.9	134211	88043	79955.8	114478	30910.1	117693	102464	119933	81765.2	87827.8	143558	82556.9	92819.4	110472	154177
LIPID-N-0362	GP	PE	798.601	799.609	[M-H]-	C45H86NO8P	18407.7	41264.3	57460.3	766.824	3630.14	96543.1	2364.01	2441.91	845.808	25968.6	63303.1	21389.4	810.87	73621.9	1521.18	82804.9	1854.22	1699.32	1538.74	2664.9	86067.8	79273.3	2459.45	29779.1	61047	47011.5	20542.7	87258.8	61915.3	3293.07	2341.4	56383.4	49796.9	2642.14	74685.1	83372.5	2732.8	3656.78	75685.7	2035.49	60663	3488.77	6248.22
LIPID-N-0377	GP	PE	796.586	797.593	[M-H]-	C45H84NO8P	8779.79	11409.3	22285.1	629.724	5941.19	42097.5	3733.42	2250.08	2524.43	14763.2	27853.9	13356.2	2805.7	33451.8	5761.33	36599.9	5209.39	6039.52	4246.42	1943.87	39219.5	35043.2	2904.2	13872.7	28110.4	21705.3	13413.4	36886.1	32788.5	10948.6	13549.9	37228.7	20343.5	10566.9	32361	43380.3	9884.49	13287.3	39185.8	10329.8	31539.8	5737.38	19125.8
LIPID-N-0350	GP	PE	714.507	715.515	[M-H]-	C39H74NO8P	1.39302e+06	3.15978e+06	5.13874e+06	799170	1.50701e+06	6.62825e+06	2.84572e+06	1.22365e+06	868848	4.0929e+06	5.10397e+06	4.5112e+06	1.79536e+06	5.69935e+06	1.84618e+06	8.08449e+06	2.62537e+06	2.28951e+06	1.34671e+06	1.03083e+06	1.02429e+07	7.62429e+06	1.16853e+06	3.09691e+06	7.01905e+06	6.11347e+06	2.76885e+06	9.00754e+06	7.66511e+06	3.53686e+06	2.32023e+06	9.46976e+06	4.09828e+06	3.7224e+06	6.82267e+06	8.55371e+06	4.82367e+06	3.7129e+06	9.71792e+06	4.5275e+06	6.18147e+06	6.20175e+06	6.29253e+06
LIPID-N-0382	GP	PE	738.507	739.515	[M-H]-	C41H74NO8P	39909.3	30627.3	69753.3	15812.6	27296.4	48807.8	58822.8	37255.7	15782.2	33471.8	45476.2	53001.7	52901.2	77955.5	26914.6	93919.2	74234.2	44492.4	21464.9	22247	235021	165600	25931.3	30022.7	52765.7	152291	65562.5	181130	207013	108574	84455.8	178355	57849.7	145568	123730	178206	166519	107358	206108	117363	176450	174515	153131
LIPID-N-0375	GP	PE	796.586	797.593	[M-H]-	C45H84NO8P	21157.1	38325.2	58418.5	514.56	102.912	102.912	102.912	102.912	102.912	102.912	102.912	29278.7	102.912	82717.4	736.92	82237.5	102.912	102.912	102.912	102.912	112920	98440.6	102.912	47020.7	97690.1	67840.4	102.912	121819	102.912	102.912	102.912	74604.9	38968	102.912	102.912	81821.7	2090.4	102.912	102.912	2034.04	102.912	102.912	4504
LIPID-N-1098	GP	PE	788.523	789.531	[M-H]-	C45H76NO8P	160355	212920	196485	97442.4	93460.9	187075	97809	89125.6	84594.6	117441	189059	127239	59571.3	254569	94557.5	224357	146364	138295	61780.7	87052.2	330421	380642	75012.5	184081	216665	262606	207305	328401	250273	133152	222906	408140	222902	151448	218140	244840	176822	148563	304491	185522	259048	161256	237051
LIPID-N-0328	GP	PE	774.601	775.609	[M-H]-	C43H86NO8P	24040.9	16734	25105.4	10522.2	24507	24713.1	25426.9	23883.2	18413.9	14033.5	17779.3	10583.5	14306.3	18901.5	16482.8	21281.4	15925.7	14152.2	13832.8	16792	35177.5	33312.2	14409.1	17609.6	20447.1	27265.2	19002.2	23674.9	20703.6	16740.1	19097.3	43514.6	20397.6	13429.6	21157.4	24695.2	18620.9	17229.8	27771.9	16698.2	25055.8	13430.2	32223.4
LIPID-N-0373	GP	PE	768.554	769.562	[M-H]-	C43H80NO8P	94180.3	427497	203395	1717.54	47893.3	266259	67134	39405.9	9535.63	59682.9	91478.9	36133.8	14113.2	157421	46583.3	189018	40272.3	39904	11339.2	18426.7	213247	168019	17536.4	113519	112292	128874	106737	308644	181878	59619.7	23176.8	225563	177988	29470.1	278535	107692	36626.8	36180.4	100572	31561.5	131652	35492.7	113808
LIPID-N-0354	GP	PE	742.539	743.547	[M-H]-	C41H78NO8P	14677.5	34313.1	40869.3	15820.3	7189.1	57957.1	11637.7	13600.8	18067.5	19816.8	29057.4	32636.7	6989.4	53012.3	4233.58	50002.7	11449.9	9709.08	14599.6	16801.1	103530	75902.2	8961.15	42038.5	45796.2	59737.1	24146.1	97143.8	69723.5	15492.5	17561.4	106636	29905.8	32208.7	60977.6	63426.1	39206.8	23651.3	69156	36137.8	45048.9	20802.1	45280.7
LIPID-N-1090	GP	PE	764.523	765.531	[M-H]-	C43H76NO8P	10789.3	13704.2	30017.3	4985.16	7563.19	19721.4	7001.8	4966.47	2366.32	5019.76	18740.7	7619.05	11425.9	27813.9	9667.66	24977	13471.6	7001.03	4118.73	561.66	100539	88170.6	5611.65	9375.68	23362.9	40978.4	22192.8	54015	40981.1	18155.7	34253.8	57080.4	43481.7	21904.4	37011	30445.4	28851.7	20110.5	38350.6	17312.6	29567	18239.3	39635.1
LIPID-N-1096	GP	PE	790.539	791.547	[M-H]-	C45H78NO8P	88023.3	76953	111814	175435	197608	131548	205371	237543	143301	259038	267561	313615	254368	124951	387533	201135	239768	290953	322569	294611	212018	274752	186384	244131	209029	275612	324022	291667	377369	418342	497345	253309	99384.7	356817	462240	347264	441031	434391	328252	448465	402204	356814	462991
LIPID-N-1105	GP	PE	814.539	815.547	[M-H]-	C47H78NO8P	78740.9	61552.5	104755	199917	256555	224047	350647	134553	191634	657599	360570	294494	293617	314425	419816	553847	237564	439484	392311	284319	451981	434450	207994	331647	461942	499987	310860	530736	519807	533400	578013	465594	158042	430232	326229	607934	493599	556155	598340	477759	537379	514467	583874
LIPID-N-0372	GP	PE	768.554	769.562	[M-H]-	C43H80NO8P	19828.6	39992.9	65177.5	50348.7	45015.5	111610	68653.2	57468.2	29495.8	74780.4	108200	137056	54690.5	99947.6	46209.8	140446	54413.4	79825.8	53187.1	53170.9	198509	160576	42453.8	80057.1	100459	120511	101965	158767	141547	79447.4	53720.8	181937	54557.2	79678.8	148463	142315	100001	72512	167753	73002	135451	118109	168078
LIPID-N-1106	GP	PE	812.523	813.531	[M-H]-	C47H76NO8P	35960.2	45430.6	47738.9	32634.2	57133.7	42263.4	47026.5	28342.1	26832.9	79048.8	51658.8	59217.9	35221	68476.3	74364.7	85309	43047.2	77599	44078.4	35273.4	54004.2	61390.8	32875.6	63485.3	64102.9	75136.3	66624.3	51654	67314.7	81480.7	48016.9	54723.9	55568.9	68476.3	57919	74357.5	50874.6	75126	65741.7	85301.3	45498.8	84527.3	52447.3
LIPID-N-0387	GP	PE	766.539	767.547	[M-H]-	C43H78NO8P	338023	697021	911118	971708	775679	1.91023e+06	1.1486e+06	1.0778e+06	462732	1.35806e+06	1.74339e+06	2.4296e+06	1.18026e+06	1.64705e+06	751515	2.15802e+06	977619	1.21e+06	885214	1.07437e+06	3.03389e+06	2.72573e+06	688541	1.45416e+06	1.70281e+06	1.80957e+06	1.5393e+06	2.49034e+06	2.43939e+06	1.1078e+06	880226	2.97675e+06	954571	1.30576e+06	2.46076e+06	2.39968e+06	1.67555e+06	1.06359e+06	2.69918e+06	1.14987e+06	2.22208e+06	2.05744e+06	2.70121e+06
LIPID-N-1104	GP	PE	786.507	787.515	[M-H]-	C45H74NO8P	2251.06	3431.86	7886.09	28667.9	30178	10785.8	20509.5	21565.7	32846.5	25875.4	42187.2	93365.1	15874.7	10477.1	11749.7	18006.5	14629.2	13781.2	12560.1	50063.7	15950.2	14756.4	10099.4	15379.3	18225.7	19663.2	14898.4	29610	31499.1	22504.7	21878.5	13676.8	6619.52	25903.7	26511.9	32844	19933.5	7300	29475.3	15398.9	33972.5	29448.1	23000.3
LIPID-N-1103	GP	PE	844.586	845.593	[M-H]-	C49H84NO8P	2904.27	4177.51	2213.02	3102.15	2770.17	7304.77	3441.8	2669.16	2784.67	6223.04	8925.89	7536.2	2573.75	5025.11	5335.89	9271.63	4293.23	5345.93	4496.68	6943.67	5258.35	8694.46	2197.56	3487.25	5798.22	6596.85	8179.4	8760.33	8045.81	3992.72	8461.89	11357	3551.42	4464.56	6388.83	7766.47	6608.21	6457.74	6956.49	6029.64	9041.6	8652.48	7838.61
LIPID-N-1102	GP	PE	816.554	817.562	[M-H]-	C47H80NO8P	21006.3	20762.1	47301.8	74913.8	89636.3	58910.9	98844.1	101840	59353.8	80066.9	68365.4	61371.1	137264	35425.2	201889	84938.4	126780	135923	148048	74859.2	136747	130581	90375.6	114890	99514.8	180222	120359	163563	203904	237589	250082	233882	56519	210934	177100	190017	230018	302664	166002	288825	159368	176326	241529
LIPID-N-0413	GP	PE	762.507	763.515	[M-H]-	C43H74NO8P	102058	240417	214312	581351	370658	825309	501103	547506	454346	1.22896e+06	632017	1.35932e+06	416127	579418	476199	1.27106e+06	576768	957526	797679	723531	1.16052e+06	760136	390983	836772	816242	641024	572495	740220	1.0299e+06	885502	759098	1.11969e+06	237870	886685	634448	765213	943561	503021	1.35376e+06	606393	923165	836034	1.00926e+06
LIPID-N-0415	GP	PE	790.539	791.547	[M-H]-	C45H78NO8P	117215	266489	328977	353808	368784	1.03236e+06	639662	463357	210715	792187	765066	1.22975e+06	495932	757777	493470	1.32586e+06	522574	828261	700798	586166	1.45672e+06	1.4087e+06	402749	1.10063e+06	777150	872491	585686	932643	1.17811e+06	616046	455159	1.53625e+06	398250	681436	927333	896859	1.06698e+06	677464	1.5188e+06	537718	960389	883462	1.15768e+06
LIPID-N-0426	GP	PE	788.523	789.531	[M-H]-	C45H76NO8P	6665.19	17167.2	31973.5	73574.6	58531	58911.7	49953.6	67970.6	40135.2	123280	76494.1	196393	97702.8	43955.9	70712.7	137606	90027	90671.3	71838	61314	205071	152480	51516.1	85580.5	102888	122726	74283	155185	156731	123074	122333	222980	45866.3	220972	102742	131872	176853	171180	250444	122271	153862	180123	255274
LIPID-N-0736	GP	PE-O	702.544	703.552	[M-H]-	C39H78NO7P	74839.2	147943	203125	11673	25921.5	326888	36403.1	19646.2	13906.7	102045	239424	103024	11906	249816	25888.3	264619	38893.6	27504	17826.5	18691.8	320056	269090	19744.9	114043	199564	175794	101670	312881	244005	40975.4	32635.7	234456	158338	28710.3	278036	297047	24537.3	41845.8	262768	40054.9	228730	28658.8	71166.3
LIPID-N-0749	GP	PE-O	700.528	701.536	[M-H]-	C39H76NO7P	90518.6	138526	205937	12193.2	32075.2	492081	18499	14122.5	2278.57	162499	345330	135755	8196.53	389671	22318.5	403809	16060	44232.2	38674.1	27676.6	445020	493148	22369.6	198686	411839	285446	199189	621286	470325	34542.2	95941.6	361337	161826	19689	331549	391597	40372.7	88121.9	372346	33569	395588	86612.2	74067.4
LIPID-N-0788	GP	PE-O	724.528	725.536	[M-H]-	C41H76NO7P	141694	58392.6	142887	186737	281566	91732.3	176913	362823	110361	211080	158633	190016	159950	143413	652440	168575	224857	438723	309409	231791	342764	278530	364559	236073	192460	336704	443247	643372	544189	594927	490260	250693	224843	245415	413247	467723	403098	444911	483641	307134	690173	430617	744987
LIPID-N-0792	GP	PE-O	752.559	753.567	[M-H]-	C43H80NO7P	35565.5	50048.4	72757.6	36822.7	42311.4	173727	23869.2	36257.3	42213.6	99670.7	174617	89830.4	34726.4	149880	37550.3	181294	29928	38538	38001.9	41917.6	178823	163892	34029.3	93767.4	159912	125068	84390.6	209751	200881	49906.4	38864.7	123219	61025.7	35106	149253	180722	39950.5	47424.1	147614	39661.4	160680	37549.1	58022.9
LIPID-N-0812	GP	PE-O	750.544	751.552	[M-H]-	C43H78NO7P	29812.7	53621.3	74757.8	14057.7	18344.7	197648	18465.9	20010.4	16644.4	130877	175044	69228	10243.1	145217	66639.5	233481	37346.3	41106.2	29897.9	23358	277048	213525	32187.7	123334	226032	138722	155338	282074	246736	79662.9	138248	196212	70792.5	39670.2	175280	199576	43583.5	56593.7	211717	38531.5	299164	60736.9	81626.6
LIPID-N-0839	GP	PE-O	748.528	749.536	[M-H]-	C43H76NO7P	86837.6	91307.5	135908	107653	156544	374976	177888	150685	78277	348246	364004	179759	137859	369257	400926	318416	176179	275972	205238	154348	466835	448826	187450	274831	279001	446503	334808	561330	533599	360132	412710	490073	152959	223915	387495	484306	282721	355040	532524	273815	518709	284677	474635
LIPID-N-0789	GP	PE-O	724.528	725.536	[M-H]-	C41H76NO7P	59086.4	55611.9	126436	87024	145211	76134	150060	212189	96343.9	143378	209044	119174	170122	109813	200652	205105	165473	213205	186355	187897	241526	212527	166185	179249	167620	226780	209951	303807	376841	308609	189565	211489	78887	211194	308542	267937	320218	211562	260698	326688	232316	239623	319382
LIPID-N-0809	GP	PE-O	722.512	723.52	[M-H]-	C41H74NO7P	648944	486847	803445	1.13654e+06	1.46359e+06	714766	1.22588e+06	1.85264e+06	940058	1.23642e+06	1.77946e+06	1.90073e+06	1.63834e+06	816691	2.26126e+06	1.35918e+06	1.49711e+06	1.69609e+06	1.90745e+06	1.50005e+06	1.50328e+06	1.75482e+06	1.33309e+06	1.39596e+06	1.1295e+06	1.97425e+06	1.92147e+06	1.66227e+06	2.43136e+06	2.61393e+06	2.49655e+06	1.92842e+06	818238	2.04276e+06	2.52564e+06	2.3369e+06	2.99225e+06	2.33418e+06	1.99718e+06	2.62875e+06	2.25133e+06	2.30598e+06	2.92447e+06
LIPID-N-0759	GP	PE-O	756.591	757.599	[M-H]-	C43H84NO7P	2017.96	3155.22	2687.07	3800.65	3550.91	3411.39	4862.6	3317.19	8538.09	5198.83	3813.69	4043.9	1820.24	2188.58	2462.83	2105.2	2219.64	4091.91	2994.5	4870.86	2197.31	3428.26	2276.03	1916.53	2340.63	1883.04	3759.34	2938.32	6130.41	2441.41	2662.72	1794.13	2072.5	4100.08	6198.24	2408.29	2357.75	3624.91	1860.02	2724.8	3776.13	2237.46	3103.68
LIPID-N-0840	GP	PE-O	748.528	749.536	[M-H]-	C43H76NO7P	53179.8	53183.8	92435.1	72155.8	100086	170355	152881	83571.4	70282	268595	157669	144363	172472	181949	242615	292696	158561	189344	202818	119607	243846	272391	95600.9	131702	264163	203469	167242	233111	294545	292533	232479	280658	118750	183642	215360	315550	221135	355892	267949	247649	245120	283797	210945
LIPID-N-0857	GP	PE-O	746.512	747.52	[M-H]-	C43H74NO7P	1.1944e+06	943759	2.62779e+06	2.05992e+06	3.14095e+06	4.11021e+06	3.78066e+06	2.08955e+06	1.95271e+06	7.3409e+06	4.59903e+06	3.78093e+06	3.33259e+06	4.18732e+06	6.36357e+06	7.09835e+06	3.5494e+06	4.47437e+06	4.05094e+06	2.73045e+06	6.22051e+06	6.76971e+06	2.4977e+06	3.46246e+06	6.00204e+06	5.18302e+06	3.50748e+06	6.29684e+06	6.62159e+06	6.68351e+06	6.27296e+06	6.78602e+06	3.00021e+06	4.53379e+06	5.39791e+06	6.71718e+06	5.69477e+06	7.56776e+06	7.12744e+06	5.77778e+06	5.92003e+06	5.50599e+06	6.00875e+06
LIPID-N-0811	GP	PE-O	736.528	737.536	[M-H]-	C42H76NO7P	53314.2	27195.6	61812.2	52676.7	91599.8	35289.2	86284.5	99011.1	40367.2	49448.5	86038.9	57556	113628	59725.8	199923	80837.4	120392	115888	113843	83875.1	138696	150962	89898.5	100804	81093.8	186590	148316	169325	174205	229817	191926	221832	65359.7	128152	189411	207513	277859	183230	235754	206149	146251	234271	268041
LIPID-N-0858	GP	PE-O	760.528	761.536	[M-H]-	C44H76NO7P	9926.75	5392.21	16462.8	28873	21404.6	23116.4	24764.3	30952.6	18056.7	31181	35078.2	35490.8	28932.5	31279.1	67902.6	65432.9	35078.2	66849.4	47456	32190.3	46498.1	41679.1	30952.6	46218.3	45393.2	68912.1	41412.7	67259.7	53499	76433.1	79236.2	83769.6	20226.2	46829.2	42648.3	68087	91611.5	88593.9	83532.1	52863.5	55709.3	70025.7	74284
LIPID-N-0738	GP	PE-O	730.575	731.583	[M-H]-	C41H82NO7P	137647	272919	409118	6843.48	16320.7	627563	12686.6	11481.8	12061.9	177122	447104	165421	8882.3	498343	15310.4	509965	9079.76	17225.3	11525.4	14043.4	613367	502028	12065.8	199818	437468	297322	158267	558710	415240	24318.7	23293.5	362878	297691	18191.1	549080	559827	16640.6	28444.4	470517	14848.6	401877	18233.6	36454.1
LIPID-N-0752	GP	PE-O	728.559	729.567	[M-H]-	C41H80NO7P	198885	374946	578803	5653.5	10407.8	1.14404e+06	9303.58	8156.43	5284.25	345800	828719	298646	5432.25	812129	12597.7	931954	9656.19	15412.4	5609.36	10947.5	1.11194e+06	927042	7859.56	488533	959460	681520	362348	1.20826e+06	981386	19782.5	22518.2	711407	381084	9381.84	684796	798543	22098.5	18816	741748	20263	919219	18023.7	34326.8
LIPID-N-0742	GP	PE-O	758.606	759.614	[M-H]-	C43H86NO7P	4435.75	9551.55	13048.1	3069.15	2857.81	18118.1	3507.96	2777.42	4923.52	6931.5	10557.2	5703.91	1409.27	11609.8	2725.69	11663.2	1711.24	1760.34	3080.42	2786.63	14224.2	13204.7	2722.36	5839.03	8920.8	7951.87	5324.31	13236.6	10612.6	1874.73	2998.64	11434.7	8184.52	3116.38	13457.4	13720	2337.71	3792.93	14290.2	2467.1	11522	1663.89	4176.61
LIPID-N-0793	GP	PE-O	752.559	753.567	[M-H]-	C43H80NO7P	40563.9	34035.2	49475.4	48655.9	93747.9	41862.5	79483.6	103785	47360.4	50926.9	78505.3	104591	95675.8	37883	125376	62078.8	94054.9	105188	122100	71608.5	90454.4	108070	86627.9	86443.2	53507.5	110781	101568	119415	123077	162664	146786	116120	53558.9	102626	137490	145715	175824	108625	130366	121133	105128	136421	143584
LIPID-N-0784	GP	PE-O	782.606	783.614	[M-H]-	C45H86NO7P	6728.62	14496.9	18617.7	5958.02	227.067	227.067	227.067	227.067	227.067	227.067	227.067	10445	227.067	31672.6	2424.92	31918.5	227.067	227.067	227.067	227.067	36163.9	33468.8	227.067	13664.8	27812.9	17387.1	227.067	33629.5	227.067	227.067	227.067	27235.4	18335.5	227.067	227.067	35500.1	2696.92	227.067	227.067	2777.32	227.067	227.067	3571.12
LIPID-N-0796	GP	PE-O	780.591	781.599	[M-H]-	C45H84NO7P	39257	75311.8	98907.7	17809.7	17658.3	235933	10687.3	19026.6	29294.8	93608.1	218157	84837.9	8564.88	185212	12204.1	223308	9758.92	13628.9	10921.3	19045.9	257933	217927	11210.5	104414	205602	154901	85209.7	263517	233141	20418.2	17147.4	174060	81270.2	13657.9	178886	206132	15848.3	18198.1	191657	11947.9	209997	17607.3	19061
LIPID-N-0817	GP	PE-O	778.575	779.583	[M-H]-	C45H82NO7P	15458.2	38556	50010	3447.85	5015.29	97063.5	1907.05	4155.01	4228.98	44979.1	99509.1	35788.9	2550.83	84317	2847.08	103929	1705.62	2975.82	4218.79	2426.57	117254	101540	4549.2	41563.5	93491.3	62757.8	33779.7	126859	103755	3528.95	3910.71	84201.7	42382.7	3677.17	94844.7	118316	1742.34	3929.84	108980	2539.6	77333	2424.28	6036.41
LIPID-N-0843	GP	PE-O	776.559	777.567	[M-H]-	C45H80NO7P	33247	48959	84307	28362.4	37454.1	279356	25365.5	31382.1	16649.1	123182	216332	84586.4	27601.1	194875	53231.8	230919	28650	65139.2	38974.4	33023.6	280717	282940	32363	130315	218741	184517	131728	288782	255674	58136.4	61643.7	210878	80356.7	37403.9	180409	237115	44641.7	60519.3	227323	39530.9	293426	43209.4	57590.3
LIPID-N-0758	GP	PE-O	756.591	757.599	[M-H]-	C43H84NO7P	14123.9	12822.8	18509.3	8042.96	15289.7	14343.9	19555	17028.1	24836.8	14528.9	8790	11620.7	8843.95	9740.79	12232.1	8697.61	9152.42	13009.9	15989	11236.4	14653.8	15620.2	11789.1	9472.52	11844.3	12734.9	15342	21566	22531.7	21233.9	14290.6	17509.4	9123.23	15785.2	31786.2	15734	20326.3	19218.6	13176.7	15787.9	17519.5	13591.2	23343
LIPID-N-0794	GP	PE-O	752.559	753.567	[M-H]-	C43H80NO7P	24244	23409	27367	32933.9	61358.3	26424.2	50527.3	76391.1	33636.3	39629	50115.8	72583.8	60410.3	25238.5	86201.7	34183	56345.9	72447.9	84015.4	49282.4	60326.5	79521.8	61001.9	52135.1	41265.9	67402.7	75308	70333.3	90040.7	104946	91947.8	72465.1	30048.8	62175.6	93185.9	86611.5	112973	74764.2	85793.1	77745.5	77888.7	89751.5	101719
LIPID-N-0763	GP	PE-O	784.622	785.63	[M-H]-	C45H88NO7P	2118.19	2597.45	1135	2249.9	3984.02	2037.94	2882.14	2603.26	5705.62	1669.75	3219.06	2309.48	836.104	793.059	1519.42	1433.99	744.119	2152.09	744.62	2436.33	2169.9	3868.14	1382.26	788.307	1331.15	2004.65	2183.97	1712.16	2701.76	2297.15	1032.05	1574.87	1615.85	2492.14	7245.88	1478.01	1369.25	3240.42	983.303	1859.95	3124.69	1573.07	2409.08
LIPID-N-0783	GP	PE-O	782.606	783.614	[M-H]-	C45H86NO7P	4036.25	5895.7	3473.29	5787.65	6011.83	5358.52	5657.2	9122.68	18794.9	6263.56	4923.13	5193.7	2090.74	3790.12	2484.47	3576.38	1559.67	3336.2	4672.75	6295.98	3704.18	3583.79	1737.01	4714.74	5774.22	3786.44	2535.98	6005.86	8312.77	4280.09	2334.25	3285.7	3578.43	3822.11	11566.3	4468.03	2339.81	6251.23	3642.6	2860.49	5457.87	2338.85	4954.78
LIPID-N-0859	GP	PE-O	774.544	775.552	[M-H]-	C45H78NO7P	143101	141135	197076	243515	298020	426361	329771	289878	187787	494309	462563	358480	355533	376543	575329	581150	333556	601103	462269	396140	601603	611786	313014	411736	509732	622560	452191	702085	753724	701609	639747	633621	248239	458498	569893	645748	721852	724798	778808	539847	668774	622191	599814
LIPID-N-0828	GP	PE-O	806.606	807.614	[M-H]-	C47H86NO7P	6430.71	9098.65	13136.5	7053.07	4751.45	26508.4	5166.3	5708.25	9446.27	13040.1	25069.2	14427.2	2997.94	25096.7	6690.86	28163	3705.83	6929.43	4852.85	8892.32	23901.9	24338.8	3541.86	15761.7	26072.2	20965.1	11003	30874	30650.1	6197.59	7418.05	22863.3	11668.1	7476.95	25748.4	23201.7	7673.47	7865.62	25994.6	6412.85	21967.9	6118.41	5528.47
LIPID-N-0774	GP	PE-O	726.544	727.552	[M-H]-	C41H78NO7P	86635.2	103204	238790	104148	149254	219874	165604	107696	152403	139162	205964	125697	164997	147239	218345	175974	175653	148056	182404	121215	330799	315994	116688	147489	188459	281289	183940	426136	381758	294737	471032	522527	143570	468630	361124	349128	319312	507259	338945	473137	329409	245865	414261
LIPID-N-0791	GP	PE-O	724.528	725.536	[M-H]-	C41H76NO7P	120073	159834	447770	83329	134354	625233	326742	103770	68842.7	277511	415409	185231	262681	347254	414566	495755	412391	219261	265667	95888.6	1.02936e+06	900534	120894	247571	460118	861698	369482	1.31131e+06	1.0204e+06	712410	1.0045e+06	1.5063e+06	297384	900756	922007	740226	816334	993628	1.03598e+06	1.25433e+06	882092	618209	1.09665e+06
LIPID-N-0837	GP	PE-O	748.528	749.536	[M-H]-	C43H76NO7P	187339	148126	335327	424808	684050	292343	702408	845885	423128	525073	600899	446456	1.08308e+06	324728	1.28226e+06	440203	885204	860757	1.03151e+06	497018	995593	1.02199e+06	653753	676609	627537	1.11853e+06	878481	1.02421e+06	1.39828e+06	1.61693e+06	1.77106e+06	1.45781e+06	350876	1.29778e+06	968688	1.22114e+06	1.5291e+06	1.9742e+06	1.18868e+06	1.74008e+06	1.04789e+06	1.20673e+06	1.46286e+06
LIPID-N-0871	GP	PE-O	772.528	773.536	[M-H]-	C45H76NO7P	199113	179464	468621	410562	694962	541530	872671	423455	340220	1.02941e+06	717225	589156	766584	619660	1.6771e+06	1.09887e+06	763966	1.03052e+06	923375	446053	1.47537e+06	1.51843e+06	531449	639249	1.13667e+06	1.53319e+06	700197	1.6718e+06	1.54349e+06	1.9201e+06	2.43068e+06	2.38753e+06	558009	1.70196e+06	1.20183e+06	1.48278e+06	1.59027e+06	3.03074e+06	1.86355e+06	2.08928e+06	1.3479e+06	1.59737e+06	1.74742e+06
LIPID-N-0790	GP	PE-O	724.528	725.536	[M-H]-	C41H76NO7P	10663	6538.35	21780.1	12731.1	11918.7	21633.9	16808.2	9842.07	19264.3	22857.3	15989.5	15169.3	12729.4	11891.6	31555.9	18775.7	22602.1	13121.1	17264.8	12286.1	39751.7	43437.6	13900.8	22543.5	14717.1	34424.1	15243.6	64328.4	31149.3	45125	73762.6	68025.1	16065.3	52042.2	41090.3	41799.1	48765.2	55732.4	49373.9	72948	35240.4	39337.9	58435.3
LIPID-N-0855	GP	PE-O	746.512	747.52	[M-H]-	C43H74NO7P	11007.5	6428.13	18997.5	41377	51835.1	34535.2	46376.1	46393.5	34106.7	45848.4	39463.7	32269.4	52555.5	30348.7	111278	52537.3	73584.6	70968.6	68237.4	53351.4	55482.5	85544	36723.1	75491.8	30815.4	81607.7	55473.9	68198.4	80215	119349	160033	140064	22943.7	65475	59849.4	101424	111539	87303.2	91037.6	133111	77426.4	109732	122311
LIPID-N-0741	GP	PE-O	758.606	759.614	[M-H]-	C43H86NO7P	7609.9	13774	26717.4	3191.11	7825.84	23416.7	8801.34	4838.86	3418.07	6960.06	11556.9	10451.3	7104.53	11154	9226.22	11506.7	7321	8227.56	8353.86	6531.2	20677.7	18818	6969.99	6739.73	11743.7	10800.2	9109.58	25548.8	21836	10566.1	12781.4	18903.8	11273.1	9088.59	27646	16755.2	12782.2	14832.6	15693.7	9928.23	16932.1	9421.2	14945.2
LIPID-N-0757	GP	PE-O	756.591	757.599	[M-H]-	C43H84NO7P	6949.37	17192.1	21855.5	1194.19	2790.98	38895.3	4022.44	3087.96	917.928	10613.4	23342.9	8153.12	2259.58	20739	4508.49	21614	2587.77	2812.86	2919.04	3985.64	32058.5	28147.6	2497.08	12306.5	26042.3	20790.4	13074.5	28817.8	25188.3	6856.93	6146.45	24906.1	13027.1	3068.24	24570.9	22016.3	6383.88	5926.06	22064.6	4643.83	30965.5	12241.1	17379
LIPID-N-0797	GP	PE-O	780.591	781.599	[M-H]-	C45H84NO7P	6989.49	4475.55	11344.9	6789.12	15275	4799.22	18450.4	13857.5	5956.65	7965.74	14542.7	17846.2	15709.5	4486.21	27618.9	7960.3	15441.7	17928.2	21092.6	16764.2	18511.9	17568.3	12575.6	11031.7	6151.18	16413.3	18770.8	21047.4	19302.3	22863.1	25513	18040.1	6446.12	15810.5	22547.5	24159.6	36171.7	15922.7	14084.1	16858.5	15347.6	27608.1	24918.2
LIPID-N-0760	GP	PE-O	756.591	757.599	[M-H]-	C43H84NO7P	55129.1	62712.4	128584	25795.6	67961.4	56348.2	82601.4	38860	32414.2	33617	46643.2	46822.2	48042.4	30290.1	75278.7	31826.7	53150.3	52922.2	69584.9	44458.8	83826.6	80682	45660.1	30150.5	34627.9	50656.1	50708	122919	109473	80283.4	100969	85212.6	46474.7	72201.6	125593	63726.6	113868	93810.3	64949.4	75359.2	64425.3	89946.9	97124.2
LIPID-N-0873	GP	PE-O	800.559	801.567	[M-H]-	C47H80NO7P	1613.75	804.698	3837.58	5483.05	4503.26	5614.93	8447.65	4010.3	4817.63	12342.5	5839.08	5296.2	9865.69	4950.62	17909.8	8265.61	7055.08	8008.86	20829.1	9850.98	9199.15	9577.63	8490.09	4983.57	8671.63	7726.37	7842.5	10915.9	19226.5	13276.7	19286.8	8160.62	2894.29	11998.4	12317.5	13291.1	23503.1	23250.8	11578.7	15354.2	9607.79	13754.9	18111.3
LIPID-N-0860	GP	PE-O	774.544	775.552	[M-H]-	C45H78NO7P	18951.7	14187.7	18527.3	45298.2	56808.7	31783.9	67137.8	65107.2	25385	59002.1	59816.1	68907.3	45222.2	54689.7	108953	79234.6	52537.5	55980.7	117159	89572.1	44667.6	55145.9	31439.2	78328.5	76993	82195.6	59833.3	84774.9	155061	58127.1	97338.3	72292.9	21992.8	59391.6	80096.8	146454	151091	90376.5	75719.6	94315.8	55549.6	111979	91735.6
LIPID-N-0765	GP	PE-O	784.622	785.63	[M-H]-	C45H88NO7P	8137.27	10058.3	21279.1	5935.57	11861.3	3682.42	15177.7	9029.79	5796.54	5565.11	8808.71	9085.11	12511.6	3852.14	19694.6	6342.05	13762	11772.4	13438.9	9867.54	22458.1	13855.9	9821.66	5498.19	6351.58	13852.7	10490.3	31572.1	21461.3	21824.9	24556.3	19594.4	8428.69	17816.9	29565.8	14225.9	25965	22692.7	11694.7	15546.1	11370.5	19209.1	21140.9
LIPID-N-0782	GP	PE-O	782.606	783.614	[M-H]-	C45H86NO7P	15716.4	6708.14	22376.4	6914.9	13730.9	9389.71	23058.2	9499.23	5220.75	4330.81	10364.5	9354.59	13793.3	6645.47	19754.5	9819.13	18665.1	15588.3	18437.4	13817.6	39334	26675.8	7466.94	7409.57	7410.77	17576.9	15331.7	44241.7	29242.8	31804.4	32510.1	37447.5	16870	26419.2	33411.3	21867.9	48924.6	25682.4	22286	24403.8	18984.6	33511.1	33348.4
LIPID-N-0825	GP	PE-O	806.606	807.614	[M-H]-	C47H86NO7P	54880	34089.2	70982.1	48655.7	116839	28030.5	102453	78540.1	41830.7	54759.8	86461.7	77999.2	94762.5	38906.7	146917	40226.5	81525.8	87515.1	126299	90006.6	101423	94640.2	70409.9	60916.7	49028.4	89032	91337	149782	120898	122697	147597	89518.8	39697.4	83966.6	118796	115684	216616	108544	103007	88096.5	70431.7	151707	110072
LIPID-N-0787	GP	PE-O	810.638	811.645	[M-H]-	C47H90NO7P	2387.99	1865.52	3726.62	1898.18	3075.98	2619.68	4540.74	2489.7	1715.44	1584.22	2354.77	3017.02	3137.95	1753.27	4423.52	2135.94	5162.61	3204.72	4026.79	4122.65	8227.14	5717.19	2391.36	2781.4	1933.9	4239.59	2901.95	9238.82	5545.24	5494.8	7844.85	7737.47	3158.75	5133.15	8507.71	6202.09	8682.25	5497.72	5194.41	5705.57	3379.58	6417.69	6026
LIPID-N-0829	GP	PE-O	834.638	835.645	[M-H]-	C49H90NO7P	8950.15	4676.73	8950.15	8544.09	14891.5	5374.3	13809.4	11968.4	7555.06	7761.63	15815.6	16081.1	15139.5	6197.3	22154.6	9335.76	13232.6	10618.1	19331.7	15114.6	17197.8	16615.6	11600.7	10729.8	10096.9	15180.6	12104.4	26167.6	18149.4	23707.1	27070.3	18745.8	7213.88	16186.3	22599	25139	30246.1	18614.4	18742.9	16778.7	11068.6	27347.4	21080.9
LIPID-N-0785	GP	PE-O	810.638	811.645	[M-H]-	C47H90NO7P	4804.68	7245.37	8430.58	3834.67	5832.89	4081.22	11186.1	4509.42	4824.37	4103.48	9430.58	15349.2	8739.81	2289.44	8118.05	2829.74	7198.72	4261.38	14117.6	9676.25	9230.15	8610	4812.47	4804.75	4058.59	6973.65	5880.36	13028.6	19989.9	9340.87	11547.6	7425.96	3404.35	10569.3	34299.5	6970.32	17615	14863	6753.51	8877.07	4576.46	8495.36	10382.5
LIPID-P-1309	GP	PE-P	676.528	675.52	[M+H]+	C37H74NO7P	47158.6	51552.5	68191.9	45145.6	46787	53765.2	58988.7	55033.7	56216.9	36869.1	51145.7	46707.9	39825.1	43255.8	64818.3	51173.7	57663	41723.5	48844	66780.3	62234.7	72520.9	32717.4	67433	69887	61307.9	45271	82607.3	82028.1	79295.5	75293.5	97122.8	66489.9	75413.5	93440.4	65742.4	71931.2	75953.3	71660.9	66554.7	61485.2	64588.2	86683.8
LIPID-P-1340	GP	PE-P	726.544	725.536	[M+H]+	C41H76NO7P	93482.5	65373.3	141114	133822	191032	115877	196106	276551	168852	193631	253177	202706	213108	114539	182784	189165	209494	263151	332182	301748	220804	142896	261139	249524	184871	211250	267250	283231	299398	366364	202955	186463	88179.3	247199	205690	288913	330376	189082	200569	330676	236944	246749	248663
LIPID-P-0652	GP	PE-P	724.528	723.52	[M+H]+	C41H74NO7P	78829.9	31142.3	72313.5	69597.7	81136.3	36956.7	91725.9	153979	83770	61644.3	105438	138491	109189	79018.3	197673	86700.6	127847	92226.4	133957	101393	109181	106813	65355.4	84095.5	87812.9	117428	116649	136984	140073	180879	190572	143795	55885.5	138856	177180	158368	198460	168109	130189	152553	153816	153946	207593
LIPID-P-1345	GP	PE-P	754.575	753.567	[M+H]+	C43H80NO7P	15490.2	25385.5	13919.8	37315	44363.4	37776.7	41409.1	46098.8	75558	65716.8	64938.8	29547.6	34318.4	26397.8	25804.6	34483.1	16381.8	43400.9	31671.2	54714.6	24780.3	42833.2	34374.7	29353.7	49328.6	32460.5	28278.8	34194.9	72332.3	37375.7	30267.3	23021.9	28433.2	40473.7	99704.2	41564.3	23355	50861.6	22538.7	28730.4	42325.8	29538.2	37037.9
LIPID-P-1355	GP	PE-P	752.559	751.552	[M+H]+	C43H78NO7P	355786	434578	378659	1.1532e+06	1.0715e+06	830631	903524	1.42386e+06	1.43714e+06	1.26354e+06	1.98265e+06	2.12539e+06	795345	941692	1.23115e+06	1.43423e+06	851463	1.28355e+06	1.05546e+06	1.49539e+06	1.13405e+06	1.23767e+06	874480	1.19284e+06	1.6106e+06	1.20066e+06	1.27843e+06	1.24507e+06	1.67421e+06	1.22955e+06	1.11831e+06	1.00538e+06	535633	1.3422e+06	1.66144e+06	1.65637e+06	1.37972e+06	1.37716e+06	1.16411e+06	1.36369e+06	1.50229e+06	1.2621e+06	1.45177e+06
LIPID-P-1374	GP	PE-P	750.544	749.536	[M+H]+	C43H76NO7P	112689	160904	165892	206954	184947	326684	204514	190644	194807	233556	467781	264641	158127	220920	429302	373995	237978	362736	228437	344112	378440	315224	155203	199221	315982	327463	497128	368806	545692	352392	645609	501726	149671	314731	332608	342044	437740	340413	320813	427598	460346	444378	472751
LIPID-P-0661	GP	PE-P	748.528	747.52	[M+H]+	C43H74NO7P	36039.2	35889.7	57382.2	94185.8	62883.8	124689	107492	70063.8	72513.9	122125	115801	74249.2	143829	66473.3	183320	149375	90313.8	133252	142729	139102	116933	130883	65310.2	93291	93160.3	131344	137657	95071.2	143195	167043	170354	152448	59014	159579	111359	144539	114225	163517	222612	132395	137119	140305	138752
LIPID-P-1366	GP	PE-P	780.591	779.583	[M+H]+	C45H82NO7P	11185.8	11008.4	10121.7	13226.8	13542.1	19412.3	13370.3	11119.3	17025.3	21581.4	39437.1	20590.9	17173.3	27007.2	15885.6	35251.3	18293.2	13680	9009.63	22701.2	34435.6	23974.8	6785.19	21803.4	34294.4	21033.3	18295.9	36953.3	33757	22582.3	16787.7	27160.9	11040.2	14668.8	37747.5	37141.5	17914	15653	22964.5	22231.6	21160.9	19479.1	14385.4
LIPID-P-1343	GP	PE-P	754.575	753.567	[M+H]+	C43H80NO7P	57138	49889.9	61518	72206.7	125507	67322.7	133060	209023	97944.3	98337.2	126939	162261	145763	70919.3	210313	105885	129283	169186	198121	114085	134717	194829	111810	137023	104617	176351	136838	203586	214102	267419	208110	215091	86260.1	196711	244119	226423	326955	174882	230471	172124	212574	190966	228393
LIPID-P-0648	GP	PE-P	740.559	739.552	[M+H]+	C42H78NO7P	83190.6	166094	204867	45776.8	62075.9	333859	73497	106640	117859	125752	239519	258299	49935.7	272069	43073.1	274064	56112.4	61777.5	54765.8	63604.6	260986	257375	40848.9	178775	209331	150850	108837	233554	271273	90870.9	78760.9	272815	151104	113766	252551	295123	104874	94412.4	253700	96909.1	265042	139380	150613
LIPID-P-0630	GP	PE-P	704.559	703.552	[M+H]+	C39H78NO7P	317979	554878	946113	71206.4	221217	1.11845e+06	192309	147848	66840.6	335692	660370	262531	153756	844457	431868	792936	218687	190611	140908	86589.2	1.33041e+06	1.07241e+06	154656	347305	711520	706918	398655	1.36854e+06	944105	490457	569465	969290	653610	410993	1.13506e+06	1.14686e+06	398470	524423	1.10595e+06	436634	890148	410901	922360
LIPID-P-0631	GP	PE-P	732.591	731.583	[M+H]+	C41H82NO7P	383248	834716	1.19597e+06	22629.1	34906.8	1.84273e+06	31610.5	37559.9	32059.9	397249	1.08097e+06	354893	20843.5	1.46768e+06	43373.7	1.53733e+06	32840.7	38086.8	25527	34214.7	1.8126e+06	1.56765e+06	26229.6	519393	1.20603e+06	826250	415024	1.58384e+06	1.15254e+06	62591.3	63811.3	1.23393e+06	928862	47467.3	1.50896e+06	1.35818e+06	49152.5	76356.9	1.25434e+06	32286.5	1.1411e+06	41369.6	90747.8
LIPID-P-1331	GP	PE-P	728.559	727.552	[M+H]+	C41H78NO7P	409195	609576	951039	146544	332296	1.79241e+06	430756	284349	134925	514304	1.12409e+06	547437	332668	893541	535963	1.10807e+06	484185	360226	409323	337249	1.81799e+06	1.47611e+06	262755	669894	932377	1.13418e+06	756807	2.09372e+06	1.67684e+06	864859	742464	1.494e+06	648149	685268	1.7834e+06	1.24474e+06	1.12501e+06	677352	1.36557e+06	878799	1.54828e+06	861334	1.16874e+06
LIPID-P-0649	GP	PE-P	754.575	753.567	[M+H]+	C43H80NO7P	168295	140657	129917	248231	493840	158475	206173	493557	225915	239744	246737	289841	207526	184465	449156	161912	234369	653713	349844	354651	285223	304849	369164	254919	220591	366829	530000	397037	413024	520933	459453	315757	187856	226773	455065	409956	425432	338412	334418	249642	746341	333085	615355
LIPID-P-0654	GP	PE-P	752.559	751.552	[M+H]+	C43H78NO7P	47507.1	42808.2	81940.6	55478	88435.2	68985.2	92702.7	159734	70522.9	86656.3	95768.4	103757	137608	67068.4	173346	71648.9	104933	124397	167805	81227.1	152915	157477	84710.4	102058	96752.4	148563	123796	187713	155801	199151	158417	150405	51118.2	104109	210158	160539	213570	144483	188661	139749	130598	134279	259305
LIPID-P-1375	GP	PE-P	750.544	749.536	[M+H]+	C43H76NO7P	19358.2	46771.7	73176.7	18172.8	40020.9	67014.5	60137.4	49219.6	21113.8	43133.6	43196.9	29292.5	44876.3	28349.7	87834.8	39514.5	33687.4	128435	57800.1	62180.2	74317.6	49893.6	76487.4	28407.4	22590.3	50112.7	124313	57424.9	82390.8	87150.1	176455	84446.1	30071.8	58732.1	59544.4	44929.9	102436	53632.8	53553.5	74860.3	70382.5	107743	52287.7
LIPID-P-0650	GP	PE-P	782.606	781.599	[M+H]+	C45H84NO7P	135495	270479	379776	61041.8	63238.8	856601	43522.5	54458.7	83122.4	296279	678890	263709	28430.5	617321	49593.2	689930	31615.2	37763.9	40546.9	71744.6	773743	781744	26026.1	361910	675147	468582	259785	908008	701593	56281.3	49398.2	488034	265168	43117.6	573696	572288	34136.1	54491.1	615205	38447.9	676433	60704.4	69683
LIPID-P-0655	GP	PE-P	780.591	779.583	[M+H]+	C45H82NO7P	65236	145190	179022	12938.2	21818.4	392062	20960	11786	9530.19	151812	305042	101650	4897.61	330314	7347.02	370944	1360.43	8138.52	22090	6241.5	432310	353414	14480.8	135443	323603	234630	98733.1	385255	335059	26213.8	25178.8	268090	147695	11613	299771	367541	7606.79	10184.1	301897	7134.81	256122	1103.79	36993.8
LIPID-P-0660	GP	PE-P	778.575	777.567	[M+H]+	C45H80NO7P	254024	438637	670838	218303	230965	2.27486e+06	193661	226855	159311	948666	1.55837e+06	582521	181977	1.48277e+06	349501	1.71902e+06	192888	455326	319311	229354	2.42661e+06	2.13548e+06	222223	872502	1.97733e+06	1.15763e+06	887911	2.29989e+06	2.06903e+06	400303	447186	1.50948e+06	627218	228602	1.3591e+06	1.86084e+06	309378	475644	1.65113e+06	227974	1.98315e+06	266982	431316
LIPID-P-0662	GP	PE-P	776.559	775.552	[M+H]+	C45H78NO7P	15466.1	36549.5	35240.4	40871.6	58456.1	91552.6	63352.6	51608.7	34099.7	107819	89754.5	82145.9	59903.6	69088.8	127818	95833.6	52849.9	94929.7	78943.8	87543.4	131794	94122.8	66603.2	79618.2	86563.5	144594	93688.1	139397	142297	136875	119959	123825	37211.3	100597	111475	127594	128537	116175	144427	88386.6	138401	117187	119274
LIPID-P-0647	GP	PE-P	726.544	725.536	[M+H]+	C41H76NO7P	222491	102756	130843	285036	411138	80666.6	182031	539092	158197	180363	142880	201833	242653	121457	602576	117901	260544	603212	327693	251477	297196	199286	513790	163770	134423	271462	681041	523630	472727	680104	626162	289719	209366	322610	427927	370618	472161	434708	431296	369321	688436	498059	763541
LIPID-P-1357	GP	PE-P	752.559	751.552	[M+H]+	C43H78NO7P	18622.2	21187.1	28791.3	43003.3	46705.2	33747.8	59958.2	90587.9	42697.9	63115.7	82076.8	47275.1	84203.7	27390.3	58284.9	60694.5	58280.2	66586.5	121594	63483.8	74882.2	45211.2	68591.7	73526.3	58976.3	92215	66546.7	100314	108160	141496	109237	59571.6	25026.4	97597.6	68414.8	105795	107815	112935	87805.4	135159	62861.8	78831	73210.5
LIPID-P-0658	GP	PE-P	750.544	749.536	[M+H]+	C43H76NO7P	330608	515549	818143	671717	938642	2.15017e+06	656753	827961	361977	1.7303e+06	1.87345e+06	933404	782494	1.67036e+06	1.8761e+06	2.34397e+06	875706	1.34766e+06	1.17925e+06	680735	2.60724e+06	2.20912e+06	892069	1.35143e+06	2.01305e+06	2.04994e+06	1.79347e+06	3.47138e+06	2.81519e+06	1.81241e+06	1.86446e+06	2.10698e+06	725864	1.17028e+06	2.05061e+06	2.66757e+06	1.36125e+06	1.59206e+06	2.6013e+06	1.42122e+06	3.38516e+06	1.40209e+06	2.36096e+06
LIPID-P-1377	GP	PE-P	778.575	777.567	[M+H]+	C45H80NO7P	53072.5	55243	54321.8	195805	149165	119452	157993	184113	244978	217850	317646	198710	148117	116269	165510	205227	146072	204990	180928	173828	211958	204758	168483	214582	290536	199005	188721	240826	312462	206320	282078	186508	72529.2	248303	258511	258118	215941	420636	248890	237192	219549	191487	220664
LIPID-P-1390	GP	PE-P	776.559	775.552	[M+H]+	C45H78NO7P	26603.9	30791	25440.9	80848.7	81005.5	72572.7	59807.3	100018	87826.3	177516	131573	83020.5	89081.4	79375.9	58077.2	102589	63383.1	75842.7	143349	57593	115035	109819	106901	91371.8	137818	107353	98537.8	133937	159454	115715	167911	73106.9	46485.3	85625	138374	185549	108261	175305	154543	131502	176016	51763.9	155384
LIPID-P-0664	GP	PE-P	774.544	773.536	[M+H]+	C45H76NO7P	5506.75	4500.5	12498.4	44152.8	32677.9	32626.7	37427.1	25677.3	20383.3	39749.6	36090.9	27868.4	54462.2	20560.1	96715.9	34893.8	58565.8	65093.9	52613.3	29694.8	47248.5	72137.2	27494	30385.6	30879.4	50594.4	55303.8	72240.6	67054.4	98960.7	97785.5	81877.4	22245.6	86683.8	38319.8	58209.6	81614.9	89514.3	106788	113744	81537.4	68736.4	89286.8
LIPID-P-1388	GP	PE-P	748.528	747.52	[M+H]+	C43H74NO7P	11822.6	825.35	20178.5	17545.4	33162.6	21485.7	36648.9	48684.3	24258.6	18072.3	42629.4	27555.9	39215.7	10548.6	59760.4	26682.4	44312.2	43016.9	33649.1	26176.9	41111.6	62010.7	24287.1	38579.8	26366.5	64293.2	51477	65061.2	51555.7	63855.2	101761	87699.1	15258	66381	27117.9	59868.9	120094	61897.9	60779.3	98897.1	64631.3	83970.1	74786.2
LIPID-P-1405	GP	PE-P	772.528	771.52	[M+H]+	C45H74NO7P	14536.6	8796.3	9881.01	42343.2	29621.2	19586.2	26527.1	25297.9	25061.3	32216.3	42464.2	23728.7	37090.5	33049.4	103468	32225.2	44512.1	39757.1	38581.4	46541.1	76959.5	73859.9	26362.3	30722.3	46611.6	80329.3	36119.9	72193.1	67200.9	79237.9	141460	93762.2	19914.4	66973.3	47865	60990.8	97659.6	111145	94480.6	148776	91533.3	83232.9	75122.9
LIPID-P-1322	GP	PE-P	758.606	757.599	[M+H]+	C43H84NO7P	32852.1	55115.5	102789	31260.2	76296.4	60402.6	63094.6	44240.9	25695	23082.8	28574.6	51409	54857.7	33117.6	89971.5	30882.8	54883.9	63120.4	68921.6	55351.8	110151	99919.1	69542.5	34175.1	33844.1	69014.7	56946.9	167510	105241	74228.7	104036	115229	46576.7	79238.1	150441	79015.2	148517	97746.7	51590.4	82715.4	56711.4	90157.9	127076
LIPID-P-1401	GP	PE-P	802.575	801.567	[M+H]+	C47H80NO7P	9093.8	8152.56	14363.2	28810.1	32012.5	24831.8	53473.7	28617.3	18079.4	57107.3	36543	31452.5	49886.9	33556.6	84800.4	40618.3	45937.8	58141.8	109172	49480.2	66422.6	37825.8	35710.3	35227.9	27824.4	52760	56190.8	67630.8	87567.7	70394.6	88789	58255.8	14426.2	68445	77240	67333	103115	128525	53352.9	60476.5	46253	74127.3	98952.3
LIPID-P-1407	GP	PE-P	800.559	799.552	[M+H]+	C47H78NO7P	8059.4	1390.55	15408.4	27455.8	26760.9	23289.8	25417.9	32325.8	19848	28441.8	36481.7	22195.3	16462.2	24719.8	56299.8	47934.5	37405.2	41617.5	49778.3	42387.1	31616.6	19805.4	26013.3	33764.5	36468.6	39190	35442.7	58703.8	59179.1	36409.6	58432.8	48042.8	11783.9	46859.9	26746.5	61558.2	97951.7	66678.3	38216.2	65789.9	31292	63122	63904
LIPID-P-1381	GP	PE-P	806.606	805.599	[M+H]+	C47H84NO7P	11764.4	23712	24941	22637.7	38393	17558.6	69076.1	33577.9	22695.9	44832.7	54013.3	53395.9	50031.4	31654.4	62388.3	22461.6	45245.3	26550.1	118224	58618.4	39792.9	42829.6	31061.5	38386.3	29766.5	34167.7	50838.5	70579.4	132799	54639.7	56888	30188	21650.6	40218.8	108512	63118.7	116932	62474.7	30642.7	37740.6	36420.6	57024.8	82306.9
LIPID-N-1109	GP	PG	609.377	610.385	[M-H]-	C30H59O10P	305883	345299	328381	330783	312433	304159	267038	277639	263711	199340	275189	265675	268625	268706	330951	292097	305001	311446	311865	322583	261571	299349	230930	243755	249598	300189	236044	272570	256494	259756	234774	282564	291634	276096	312431	245067	237094	382769	249251	238594	275454	264031	288198
LIPID-N-1125	GP	PG	635.392	636.4	[M-H]-	C32H61O10P	25152.2	25574.7	24910.4	25763.7	23125.3	25658.6	20854.7	20432.4	19237.7	15722.9	19184.9	19664.9	16840.3	21370.3	22756.5	22486.7	20834.1	24938.6	23180.3	21793.1	17071.9	22189.3	13965.1	17286.2	16173.1	23149.2	16649.2	18832.1	19236.6	17745.8	13059	17336	20803.4	20487.6	23898.8	19091.2	15818.2	27201.6	17739.2	15935.4	19341.5	17428.8	23499.7
LIPID-N-1110	GP	PG	651.424	652.432	[M-H]-	C33H65O10P	17858.7	19404.4	15546.2	13904.6	12477.4	16496.1	13200.2	11268.1	12029.3	9938.84	12833.7	10124.4	10693	12020.2	12480.6	12109.7	11777.8	13095.8	11411.1	11428.6	11308.5	10955.4	11757.5	12255	9811.07	14691.2	9513.98	11594.6	9855.22	11629	10005	11263.3	15909	11226.8	12594.3	10436	9433.18	12922.8	9513.79	10661.9	10024.9	11189.6	14855.6
LIPID-N-1127	GP	PG	663.424	664.432	[M-H]-	C34H65O10P	143329	87775.3	127297	91736.2	85777	125211	103699	94404.5	114013	84842.2	107307	101022	104904	105436	108172	98222	109176	114643	100486	91551.6	107869	114226	100972	101778	91737.8	95084.7	103492	97500.8	84830.9	99430.7	87716.9	99057.1	90863.5	97747.3	109466	70862.2	96077.9	84549.8	97797.1	78738.1	95233.1	89990.3	89467.5
LIPID-N-1128	GP	PG	677.439	678.447	[M-H]-	C35H67O10P	1.67104e+06	1.92346e+06	1.77686e+06	1.89136e+06	1.88656e+06	1.41687e+06	1.29312e+06	1.33012e+06	1.2371e+06	939437	1.33301e+06	1.2775e+06	1.18386e+06	1.26062e+06	2.00074e+06	1.65204e+06	1.6875e+06	1.61758e+06	1.6952e+06	1.98355e+06	1.28093e+06	1.68758e+06	1.06065e+06	1.0644e+06	1.07137e+06	1.70921e+06	1.05048e+06	1.341e+06	1.33381e+06	1.29997e+06	1.07113e+06	1.336e+06	1.39101e+06	1.55029e+06	1.81005e+06	1.22224e+06	1.10683e+06	2.64447e+06	1.18159e+06	1.15312e+06	1.44554e+06	1.19079e+06	1.54768e+06
LIPID-N-1129	GP	PG	691.455	692.463	[M-H]-	C36H69O10P	97712.9	112518	97649.7	94936.9	98938.3	73546.7	65646.3	67042.7	72403.3	46292	71710.8	69790.6	65860.9	64784.4	108753	93278.7	87109.2	76931.7	99042.9	99780.6	65602.2	90448.7	60361.7	56635.8	56167	80636.9	50081.5	69760.7	67927.8	66757.4	50878.9	68368.5	70645	83949.2	98085.9	65095.9	62556.6	143589	59670.3	57055.4	72287.1	61853.6	81346.3
LIPID-N-1203	GP	PG	739.455	740.463	[M-H]-	C40H69O10P	25791.9	29273	28016.3	27697.2	28310.2	25713	27053	29305.4	27561.4	20857.9	26539.5	28149.4	26485.2	27076.9	29654.3	33075.8	30668.8	27560.3	29382.7	32543	28288	27534.7	26323.7	29195.6	26677.2	29038.1	28339	27698.3	27130.9	25042	26219.1	26673.8	26274.2	28288	29199.7	29777.6	25086.8	30431.3	26328.2	27396.8	25734.3	28952.1	27455
LIPID-N-1126	GP	PG	635.392	636.4	[M-H]-	C32H61O10P	656761	904799	761821	712658	704702	788645	677702	625137	995353	643646	894569	764287	762932	658823	791974	676148	684914	949040	758297	685345	849864	874766	806302	647743	856062	775509	842713	775420	781056	1.06325e+06	811744	681311	627383	816364	722337	844715	800554	676947	729637	719299	1.00258e+06	1.01985e+06	1.31825e+06
LIPID-N-1152	GP	PG	717.471	718.478	[M-H]-	C38H71O10P	71427.3	137370	66878.9	183333	104565	92556.4	89345.8	99705.5	118106	370621	125054	244105	82212.3	145726	128581	233631	103244	60934.4	77447.6	123362	78900.6	81995.8	72548.3	139028	240335	105523	60289	111967	99999.2	89810.6	112386	117765	67012	100814	78296.8	118109	49790.1	71471.6	66663.8	79173.3	110885	89535.4	53332.2
LIPID-N-1173	GP	PG	743.486	744.494	[M-H]-	C40H73O10P	979183	1.08763e+06	1.03608e+06	895579	1.12542e+06	1.11547e+06	867949	694928	331430	880459	710877	848870	732365	1.35469e+06	1.53502e+06	2.01231e+06	952676	872848	623223	909088	1.54636e+06	1.34994e+06	591571	827944	1.36076e+06	1.55453e+06	652553	1.45516e+06	1.5287e+06	1.30823e+06	778960	1.9961e+06	1.12017e+06	862580	1.10814e+06	1.76747e+06	971411	1.47349e+06	1.49355e+06	1.51492e+06	1.23472e+06	1.05321e+06	1.98625e+06
LIPID-N-1113	GP	PG	763.549	764.557	[M-H]-	C41H81O10P	404224	317134	332158	319975	443114	296050	381923	232854	374843	533794	412636	206335	245100	442061	453681	584109	363369	419161	319494	327642	259684	332432	217742	455040	544747	432498	419493	346551	412254	419096	323214	391064	369915	354043	292795	485264	283229	483349	364402	527010	283948	373176	271826
LIPID-N-1115	GP	PG	777.565	778.572	[M-H]-	C42H83O10P	365351	495644	311915	609706	325089	367180	426611	406896	453828	1.13035e+06	420621	966702	304954	545612	535042	618343	521630	363879	367786	599307	340118	299811	259353	436034	933304	316648	236727	369259	435624	310879	410134	400317	343943	360829	274289	735220	200778	265843	344438	292556	309189	302561	211180
LIPID-N-1205	GP	PG	767.486	768.494	[M-H]-	C42H73O10P	471930	442228	372205	710215	578883	580388	497941	1.02446e+06	481455	1.11722e+06	554876	741002	1.10337e+06	752929	921958	993800	691680	847694	599445	911363	543164	733594	661549	1.00233e+06	584671	566678	536368	664238	585114	776554	693417	965897	571802	666347	496863	677884	568013	592180	667953	646156	811697	589184	548104
LIPID-N-1118	GP	PG	791.58	792.588	[M-H]-	C43H85O10P	236571	327578	371175	227344	265347	280834	252330	207132	286489	350688	331628	179077	272449	330935	391278	336529	353583	246263	290221	219137	386959	345318	266502	248312	492386	329357	261673	430373	392385	483793	494345	436074	335984	496328	406296	434742	356747	621647	411181	474142	304007	390043	319688
LIPID-N-1120	GP	PG	805.596	806.604	[M-H]-	C44H87O10P	4.88458e+06	7.41821e+06	7.37309e+06	4.63633e+06	4.42998e+06	7.27843e+06	5.85127e+06	4.46666e+06	4.60282e+06	8.56663e+06	6.15082e+06	6.74774e+06	4.59677e+06	8.35694e+06	6.0869e+06	8.99673e+06	5.56315e+06	5.2036e+06	5.42451e+06	4.61395e+06	7.83384e+06	8.04747e+06	4.41972e+06	5.88703e+06	8.30212e+06	7.13948e+06	4.55244e+06	8.68309e+06	6.99538e+06	5.49585e+06	5.51585e+06	7.31314e+06	6.63558e+06	6.08447e+06	7.28631e+06	8.62346e+06	5.14161e+06	6.87935e+06	7.97182e+06	5.95633e+06	6.04948e+06	5.81835e+06	6.22752e+06
LIPID-N-1140	GP	PG	803.58	804.588	[M-H]-	C44H85O10P	3.06814e+06	3.86413e+06	4.0326e+06	2.46822e+06	2.36963e+06	3.7051e+06	3.21032e+06	2.38727e+06	1.75639e+06	3.58041e+06	3.6751e+06	3.00239e+06	2.71943e+06	4.16598e+06	3.47357e+06	4.71935e+06	3.44261e+06	3.41835e+06	2.5718e+06	2.56846e+06	5.31182e+06	5.04419e+06	2.39039e+06	3.13181e+06	4.02888e+06	4.78699e+06	2.98032e+06	5.13422e+06	4.44399e+06	3.82336e+06	2.95445e+06	5.05866e+06	3.94041e+06	3.44141e+06	4.30371e+06	4.74615e+06	4.09278e+06	3.67532e+06	5.04108e+06	3.86122e+06	4.27901e+06	3.64188e+06	5.20171e+06
LIPID-N-1121	GP	PG	833.627	834.635	[M-H]-	C46H91O10P	47231.8	52262.4	80302.1	32222.9	35268	48621	44129.2	32060.7	31203.7	55886.2	45954.3	49581.1	34726.9	49683.1	59097.7	53366.7	42104.2	36976.6	46269.5	27486.3	73530.9	68704.6	34730.4	41140.8	63896.3	57280.5	44773.9	73416.5	54400.4	53428.2	51820.5	59938.5	55457.1	69108.7	61874.1	64967.3	48727.4	82036.2	56555.4	66238.8	57275.3	52714.7	77537.9
LIPID-N-1146	GP	PG	831.612	832.619	[M-H]-	C46H89O10P	95619.7	91771.1	117265	133432	85422.9	103684	98256.5	136270	129527	149260	106407	114794	68675	135991	109367	163676	96706.1	90039.5	105321	131755	189219	136261	83379.3	145217	188949	134414	74647.6	164261	147308	120921	109654	148749	121292	115354	127312	154446	124043	129789	148536	155804	100428	111971	122776
LIPID-N-1188	GP	PG	769.502	770.51	[M-H]-	C42H75O10P	438346	373959	1.1164e+06	865108	589522	490985	659301	888402	844382	1.09043e+06	718299	850926	793411	768114	528171	721973	402489	726137	766581	946248	510693	543209	790131	865177	735725	563189	557007	967539	946533	574984	433620	513917	578442	637560	580055	892191	791174	420269	699706	1.05373e+06	568170	619068	615872
LIPID-N-1114	GP	PG	763.549	764.557	[M-H]-	C41H81O10P	8435.18	34562.3	42534.2	85138.2	49025.7	134554	93541.4	93553.6	79593.1	233199	129010	220101	87081.9	86144.3	79591.9	232318	98323.4	121610	125505	139574	165325	146015	64497.3	128380	145433	96313.9	105586	193075	173366	134618	78653.2	198222	34825.6	132087	115438	113300	157953	89835.6	247289	103688	135777	159986	167643
LIPID-N-1143	GP	PG	817.596	818.604	[M-H]-	C45H87O10P	52921.6	59602.4	56937.3	21693.9	28748.6	45336	32616.4	30076.4	14929.9	21142.1	38142.8	29086.8	48648.6	53068.8	57490.1	36488	55272.5	46438.6	21877	17690.2	94519.6	86233.9	38696.7	42243.7	30957.2	76831.3	34558.1	80665.7	51399.9	55227.7	71755.2	95086.7	70210.2	36933.4	61911.4	40239.7	75160.8	49753.1	74905.4	59719.4	63424.1	49612.1	81267.5
LIPID-N-1135	GP	PG	747.518	748.525	[M-H]-	C40H77O10P	197394	171178	361517	406895	420781	625708	613751	355465	274452	1.19121e+06	710025	580041	492217	645313	1.01199e+06	1.15564e+06	642981	773701	660016	466271	900876	863414	369183	572668	958721	953618	661083	1.12403e+06	1.1349e+06	981400	967576	1.00334e+06	474030	664382	822022	1.0855e+06	810698	1.08777e+06	1.2368e+06	1.03559e+06	925645	872738	1.09489e+06
LIPID-N-0440	GP	PG	775.557	776.557	[M-H]-	C42H81O10P	22362.8	65238.3	86799.1	24273.7	37738.4	70332	63391.6	61364.4	14208.4	26718.6	48606.5	98718.6	56471.7	113564	25742.7	84835.2	39581.9	60973.5	32607.4	36490.5	129209	69736.6	32547.4	38267	41885.3	67322.4	57079.2	66107	78815.2	47394.2	18766.1	66408.5	56452.2	35022.6	117430	100218	71717	43479.2	100256	54043.9	79853.1	70200.5	145072
LIPID-N-0447	GP	PG	773.541	774.541	[M-H]-	C42H79O10P	58082.2	187337	195117	36150.1	65808.9	250661	105782	69274.9	22547.9	58957.1	104919	131812	77185.6	209914	40757.4	217734	102206	104916	68412	71956.3	315020	175186	47689.1	103179	157669	186256	76295.8	143785	162194	48604	36299.3	251556	160246	42592.2	207919	192555	124878	59748.2	233333	86697.9	112709	95271.7	125749
LIPID-N-1119	GP	PG	791.58	792.588	[M-H]-	C43H85O10P	43556.6	90668	108650	122751	97068.3	356416	209766	171997	67989.4	268876	249449	325654	173165	235913	163234	408284	170564	246888	233397	188029	459216	453205	133873	299194	242747	259664	209354	325202	406625	185836	150236	480578	117568	226277	298942	299796	371136	190162	509630	186617	336337	248970	370706
LIPID-N-1122	GP	PG	833.627	834.635	[M-H]-	C46H91O10P	808926	1.19642e+06	1.35268e+06	742452	798720	1.39034e+06	973143	700805	632051	1.16832e+06	1.09519e+06	936752	742868	1.54763e+06	898145	1.52903e+06	743557	812571	756671	595326	1.67985e+06	1.7297e+06	792981	998226	1.47531e+06	1.29975e+06	813249	1.68103e+06	1.42154e+06	856329	965641	1.5474e+06	1.21414e+06	987236	1.42825e+06	1.46666e+06	829095	1.04435e+06	1.4482e+06	887726	1.07808e+06	880150	1.09374e+06
LIPID-N-1147	GP	PG	831.612	832.619	[M-H]-	C46H89O10P	1.98338e+06	2.57648e+06	3.02955e+06	1.73671e+06	2.08829e+06	2.41639e+06	2.58363e+06	1.71774e+06	1.1076e+06	1.73436e+06	2.15763e+06	1.64219e+06	2.22959e+06	2.83128e+06	2.64408e+06	2.80098e+06	2.65004e+06	2.14123e+06	1.73865e+06	1.70144e+06	4.07621e+06	3.82929e+06	1.90935e+06	2.15567e+06	2.48834e+06	3.47968e+06	2.39726e+06	4.23601e+06	3.6081e+06	3.00692e+06	2.6983e+06	4.02326e+06	3.3842e+06	2.77543e+06	3.40799e+06	2.97439e+06	3.2016e+06	2.85652e+06	3.88611e+06	3.1223e+06	3.18305e+06	3.07199e+06	4.24681e+06
LIPID-N-1123	GP	PG	861.658	862.666	[M-H]-	C48H95O10P	4390.85	5970.54	8032.92	4286.4	4152.67	6115.28	6366.09	4672.04	3236.3	7121.9	5426.81	3135.04	4815.73	6249.19	5356.42	7354.04	3574.85	3815.58	5650.33	4507.62	10161.4	6275.78	4540.61	5008.65	7601.37	5729.08	5296.01	9330.35	6183.19	5181.15	4390.61	6191.84	6592.35	5966.83	6594.96	6992.58	4188.1	6558.75	6014.93	4490.37	4492.49	3950.69	6219.98
LIPID-N-1167	GP	PG	857.627	858.635	[M-H]-	C48H91O10P	344961	292895	356044	713272	428138	357618	547088	773458	485838	514282	437516	454585	526092	477565	404119	522331	470723	563879	581623	747243	514353	487761	739188	595802	696895	486220	395642	562171	612180	476936	418889	448923	385847	459334	347816	437040	533375	426021	505334	515847	402332	435889	484374
LIPID-N-1189	GP	PG	769.502	770.51	[M-H]-	C42H75O10P	135113	227119	388510	89469.9	106805	124008	154427	96742	63539.2	99722.5	152154	116488	182143	228135	204138	237853	163634	152489	141798	48602.2	433706	472358	168462	73388.8	183493	328686	160148	311403	314347	366128	199544	437217	226495	472823	292161	362335	208537	315673	492167	400777	343780	293335	519945
LIPID-N-1164	GP	PG	815.58	816.588	[M-H]-	C45H85O10P	57485.3	48053.2	74688.8	107348	76040.3	73204	83982.9	70052.4	64664.6	68710.6	87127.3	72298.4	86236.7	68263.1	78596.7	70062.8	79494.9	68883.2	79492.8	81289.2	79035	85778.3	92967.5	73646.1	86219.1	93415	89823.1	80830.2	83988.3	89598	93416	78145.9	56248.4	77348.9	85896.4	86679.8	91732.9	96229.7	74279.4	78144.8	76339.5	88638.8	85887.7
LIPID-N-1179	GP	PG	813.565	814.572	[M-H]-	C45H83O10P	86445.2	112459	131577	121864	87722.5	110066	113550	97106	102405	129290	113417	109913	99407.4	109837	107246	123045	100020	120686	100899	101164	151370	119194	94068.8	118441	133686	108483	108632	147382	113110	133283	110001	94695.9	97878.9	124162	137488	118813	115068	144980	127660	133321	106637	123777	123820
LIPID-N-1211	GP	PG	793.502	794.51	[M-H]-	C44H75O10P	54774.1	82467.8	92989.9	66025.6	61990.5	73844.1	86957.5	51634.1	50356.1	74769.1	62559.6	75594.8	68682.6	96521.4	72230.4	98167.2	66990	69546	64292.8	67718.8	118877	108537	36466.7	80960.6	65403.9	86059.1	79180.9	88638.8	104259	98178.8	66034.2	95561.8	81791.9	62851.6	77449.9	95629.5	68015.8	74037.6	79005.6	84968.8	67761	65195.3	109476
LIPID-N-1219	GP	PG	819.518	820.525	[M-H]-	C46H77O10P	53970.1	66956.7	72515.8	33105	35379.4	55751.9	55250.6	49208.8	30472.4	69741.4	73132.5	67037.1	50562.6	96781.7	66224.7	83624.9	66959.5	77578.9	50529.4	45219.5	105352	94148.7	57455	56115.2	69898.2	92376	62166.3	86329.6	85311.8	70438.5	40002.2	113125	76721.2	68199.8	97568.1	89731.8	54261.9	65604.4	93925.6	66085.9	61739.9	69685.5	99241.4
LIPID-N-1193	GP	PG	811.549	812.557	[M-H]-	C45H81O10P	373300	381654	430035	427648	665676	496688	609588	385890	472168	850339	664348	376036	481991	672734	842042	1.02967e+06	656417	608901	498041	348755	597633	631330	389435	639732	716001	850761	759826	556924	729640	742932	747899	658557	647977	636275	561934	845804	638375	986841	736717	929779	478853	694635	559902
LIPID-N-1212	GP	PG	807.518	808.525	[M-H]-	C45H77O10P	43780.8	43076.1	77926.3	84023.3	61004.5	96746.7	113957	65650.6	67086.5	132967	93356.8	231361	81179	98290.2	73516.8	148966	60708.4	105892	75146.4	56478.1	100296	94898.2	45184.3	92153.2	106611	85566.1	113944	96173.5	119322	105906	106793	168819	36682.7	96083.5	120895	144284	118878	80187.1	125905	93538.5	100593	181051	167609
LIPID-N-1196	GP	PG	825.565	826.572	[M-H]-	C46H83O10P	38445.6	37047.2	46953.6	119369	44362.7	62485.6	68951.4	90342.7	131674	175846	64844.4	193381	51404.4	102224	57829.8	120575	96383.3	74089.5	58219.5	81201	77497.2	92117.2	54692.6	76896.2	160502	89920.7	48144.7	86377.1	108660	53515.8	86214	105204	57501.1	90324.1	59435.1	139976	43075.9	58840.5	99400.9	48453.3	55275.3	71738.5	56449.6
LIPID-N-1124	GP	PG	861.658	862.666	[M-H]-	C48H95O10P	4271.71	4731.34	8194.71	2060.3	2656.25	3110.94	3958.43	3109.73	1909.32	2414.73	2393.86	3277.67	3208.05	3041.65	3969.26	4772.08	3156.68	3015.08	3397.56	2732.15	5690	6518.24	2414.95	2391.39	4325.26	6719.98	2697.82	5634.05	5338.84	4174.29	3813.98	6354.84	5239.95	6597.9	5971.2	5201.82	7028.85	6694.33	5842.58	5356.71	4321.93	5097.67	6260.73
LIPID-N-1169	GP	PG	857.627	858.635	[M-H]-	C48H91O10P	26592	35653	52452.5	4357.53	9773.84	10729.1	29292.9	7886.5	4782.49	9926.46	9980.36	10959.7	20318.9	14387.6	46555.1	12042.7	30500.6	13008.5	10657.8	2965.41	76070.9	40823.7	10318.8	8909.14	15587.8	41933.3	16045.4	63241.5	34462.4	46092.9	39741.2	67208	33225.1	61402.8	44261.8	29296	47432.6	42395.1	50187.7	77690.1	22355.3	70884	72502.7
LIPID-N-1223	GP	PG	841.502	842.51	[M-H]-	C48H75O10P	365.294	365.294	365.294	365.294	3524.98	3482.48	3354.84	3437.06	8134.76	6473.49	3496.44	365.294	3027.8	365.294	365.294	365.294	4120.66	4350.42	3810.55	7397.46	365.294	365.294	6809.42	365.294	365.294	365.294	6359.98	365.294	3306.13	6411.9	2565.45	365.294	365.294	1826.47	3615.43	365.294	365.294	2552.32	4543.08	365.294	5817.87	3966.89	365.294
LIPID-N-1198	GP	PG	839.58	840.588	[M-H]-	C47H85O10P	97851	133230	118299	182348	215629	227820	168606	186865	309605	336758	215611	179104	185763	187423	274568	274836	248235	208987	249370	236638	249928	226691	231561	200680	328490	282552	213980	238835	314119	284535	294469	257146	158127	262611	189078	349851	230583	435322	286414	282093	204521	233881	216185
LIPID-N-1207	GP	PG	837.565	838.572	[M-H]-	C47H83O10P	22717.5	32347.2	34416	42669.1	35790.6	53996.4	50244.8	37902.4	36592	70978.3	55748.3	26154	48184.6	58170.3	43419.8	73645.3	57483.4	54372.7	51621.5	31067.6	46110.1	44874.3	31071.6	53067.5	70202.7	79151.2	63320	49551.2	69520.1	60622.5	60081.5	68142	54162.8	51784	41990.3	75101.8	78006	97732.3	61936.3	94407.4	26220.2	47495.6	68136.9
LIPID-N-1141	GP	PG	803.58	804.588	[M-H]-	C44H85O10P	89471.5	162563	160931	136075	67380.5	181272	109602	96609.5	85959.2	351240	159889	400081	100178	260321	128300	221920	155418	117010	72113.5	78661.2	159715	180432	80038.2	114838	307466	149210	72754.1	177261	162586	95858.1	140749	186084	149904	184238	156586	299244	67072.8	140925	177540	90887.5	113706	103921	89704.2
LIPID-N-1148	GP	PG	831.612	832.619	[M-H]-	C46H89O10P	1.30594e+06	2.26986e+06	3.31898e+06	726013	1.10797e+06	1.8252e+06	1.61046e+06	966198	545290	1.85798e+06	1.40602e+06	1.67433e+06	1.31259e+06	1.96962e+06	1.73432e+06	1.92117e+06	1.61418e+06	1.14656e+06	1.36842e+06	538746	2.73191e+06	2.78168e+06	1.14282e+06	1.05163e+06	2.04345e+06	2.77608e+06	1.18836e+06	2.66736e+06	2.01898e+06	1.92964e+06	2.02789e+06	2.85769e+06	2.08808e+06	3.20265e+06	2.60293e+06	2.83185e+06	2.07448e+06	3.30573e+06	2.82776e+06	2.7309e+06	1.8574e+06	2.13222e+06	3.38585e+06
LIPID-N-1150	GP	PG	859.643	860.651	[M-H]-	C48H93O10P	15516.9	17935.7	27576.2	5681.88	9432.2	14274.3	12899.6	9755.96	7007.36	19403.2	11866	11605.8	14467.6	14841	18995.5	13948.7	14851.6	12442.5	11672.4	5078	30195.5	18128.6	8300.71	10709.7	15602.4	23212.4	9464.51	29960.2	17830	18421.8	19284.8	30367.8	17552.4	29862.9	26370.5	21912.3	20730.3	28566.9	22757.5	26515.7	15045.5	24928.4	30783.2
LIPID-N-1170	GP	PG	857.627	858.635	[M-H]-	C48H91O10P	16756.1	28405.8	35512.7	27052.4	15335.7	19826.3	32712.9	27339.2	21996.6	41450.2	32273.2	31255.9	21053.6	43941.4	25109.3	37099.8	24366.4	19206.1	21581.5	14219	68355.6	37811.3	24349.1	27954.2	56916.6	47513.9	16926.3	52371.3	60473.5	20202.7	33984.1	43107.3	33469.3	53816.8	38066.6	59261.7	27137.2	50076.3	42774.7	52113.9	24602.5	31704	34517.1
LIPID-N-1185	GP	PG	855.612	856.619	[M-H]-	C48H89O10P	79337.8	148387	223056	205230	135241	150754	231975	186332	201296	261528	212510	205758	181316	241797	138314	270564	246812	184917	199290	129490	406270	241360	190893	133445	339005	348363	135977	349080	346222	193510	274498	261226	241057	331066	204587	322144	209649	309432	303350	280967	195201	195342	224384
LIPID-N-1200	GP	PG	853.596	854.604	[M-H]-	C48H87O10P	230567	318828	327857	530184	417084	498473	432937	369368	523574	497228	549259	530623	541954	504126	514136	627323	644140	426487	500948	270841	756012	803258	462633	429724	590100	888172	520706	626529	663108	569952	753706	764489	576509	718956	661836	754715	551510	856648	696212	682736	583448	508501	621238
LIPID-N-1208	GP	PG	851.58	852.588	[M-H]-	C48H85O10P	10882	44967	56746.7	18432.7	10023	71887.2	18215.6	8461.16	7535.47	17792.9	27314.2	18152.6	14996.8	39766.1	34141.9	27315.5	14405.8	35813.2	10777.7	7464.07	34009	27450.2	11666.2	15806.2	35887.7	32546.6	27057.4	27542.8	30493.2	11690.5	57448	39229.4	24858.7	44077.2	13674.8	25819.3	19134.2	33382.3	35046.9	17481.4	50793.6	31640.3	17377.5
LIPID-N-1216	GP	PG	877.596	878.604	[M-H]-	C50H87O10P	20881	42554.2	27143.8	43740.9	30834	43165	51451.5	26164.1	19022.5	50589.7	48515.4	72253.2	46775.9	59187	66549.3	97925.4	69528.7	55983.2	56198	29484.6	81394	107486	48677.8	51453.9	51451.5	60852.2	29880.8	64549.1	70635.5	74045.6	79706.4	51350.2	31460.4	79457.4	42998	62625.6	65388.5	80385.8	79050.6	64490.9	70017.5	49439	75838.1
LIPID-N-1225	GP	PG	865.502	866.51	[M-H]-	C50H75O10P	1985.24	4847.93	2042.59	9216.75	4676.46	5880.06	4694.97	2992.34	6809.8	10335.9	5754.73	15933.8	4113.98	3852.52	16337.4	6930.62	4300.15	8851.57	7445.43	23946.1	4285.74	2000.22	12131.3	6654.26	1553.93	4303	7595.47	1852.56	4519.94	6856.79	3361.36	2963.45	3524.43	3423.28	3575.74	2721.21	7685.19	4354.07	4387.69	4612.68	8371.18	5668.42	4052.74
LIPID-N-1149	GP	PG	859.643	860.651	[M-H]-	C48H93O10P	41359	59725.3	83865.6	14323.1	25019.3	39239	41256.2	18331.6	13385.2	33259.8	30681.4	32500.3	33044.8	38674.6	58280.6	34804.3	41641.2	25164.5	33739.5	12770	84177.9	60006.8	24879.3	20249.2	39718.7	57870.4	34124.9	78660.8	54172.5	58707.3	61545.8	79228.9	51666.5	95723	66495.1	64972.7	52917.8	82202.2	63366.3	87530.2	36248.8	69935.2	94366.1
LIPID-N-1168	GP	PG	857.627	858.635	[M-H]-	C48H91O10P	99538.5	105821	179435	16480.9	46529.4	41778.8	88293.2	24758.1	13162.4	24721.9	37020.3	20444.5	76005.4	62243.3	150113	52681.8	115946	39283.9	44966.3	13415.9	269407	133288	42463.7	26798.6	52007	165455	54761.2	204426	136187	154866	142160	227105	126936	209636	163165	116361	149870	153974	155793	275358	85155.7	255107	265884
LIPID-N-1201	GP	PG	881.627	882.635	[M-H]-	C50H91O10P	22289.5	17472.3	25713.6	16563.2	18533.5	19546.8	27425.8	25026.8	25372.5	27431.8	27084.4	19528	32913.8	22991.7	45600.2	23302.8	31202.2	19919.3	30170.5	13377.8	54508.5	52445	18519	31195.3	35654.9	35683.3	33602.9	49023.7	41818	41176	40459	65829.7	32573	46618.3	36348.2	39764	46628	47999.9	36754.5	59989.5	28795.8	42856.5	40455.7
LIPID-N-1186	GP	PG	699.424	700.432	[M-H]-	C37H65O10P	20754.6	12539.1	40224.4	14375.7	21256.2	26703.4	21765.6	19102.8	13869.3	11766.7	14987	10309.2	10686.1	20645.1	16722.3	23702.8	17633.7	13677.7	13066.6	14379.1	20616.5	22866.1	14499.7	14880	14238.2	20499.3	16179	30753.6	23539.7	19476.1	17844.7	18510.1	23290.5	14703.3	19315.2	16527.9	12209.7	9463.21	15654	11927.2	16567.2	12781.9	18191.3
LIPID-N-1371	GP	PI	669.362	670.369	[M-H]-	C31H59O13P	6689.12	8448.82	6554.98	7756.3	7301.05	7243.36	7424.95	7304.13	5960.63	4776.13	6142.75	5644.67	6020.74	6810.54	9239.77	7416.89	7083.88	9603.11	7842.57	8752.33	7547.23	6695.73	5267.4	4994.23	6974.4	7364.18	7546.49	6614.06	6871.25	5899.92	4746.47	5894.25	7599.74	6696.39	8276.52	5782.5	6639.08	11557.2	5474.96	6384.95	6719.56	5414.25	7477.59
LIPID-N-1373	GP	PI	725.424	726.432	[M-H]-	C35H67O13P	76818.2	88046.9	96036.9	92841.8	92941.4	91048.1	82659.4	94144.1	84684.1	93194.9	75767.6	88681.4	97335.6	74125.2	93640.7	94077.5	84504.9	74806.4	79107.9	93893.5	81680.5	92468.7	94639.4	86793.2	95998.3	97588.9	77170.6	89403	81658.2	93323.1	83409.5	77755.8	101985	98277.2	89330.5	77494.1	92000.6	91572.6	80578.5	90580.4	69531.9	85988.4	78819.5
LIPID-N-1374	GP	PI	781.487	782.495	[M-H]-	C39H75O13P	71466.2	85812.9	77898	110702	91541.9	77015.1	90591.4	96230.7	84442.4	109776	98381.7	127144	105378	77566	99507.9	96475.1	85229.8	91683.1	89093.8	95190.6	87364.3	98050.9	93994.7	103733	86041.6	95678.9	99109.9	95441	83698.9	108375	108423	87815.3	82387	109951	95078.8	106942	100351	109793	95169.9	101392	97159.6	97488.6	100660
LIPID-N-1386	GP	PI	779.471	780.479	[M-H]-	C39H73O13P	744369	699737	802700	840633	668904	857096	954605	846161	821447	653033	854792	841352	929645	919938	858841	868378	897675	1.03768e+06	823185	814673	958373	866268	802110	926485	1.12375e+06	874689	903758	967127	941946	966792	772899	922823	805765	832947	820704	899799	872431	867038	930778	1.02534e+06	950658	839406	911512
LIPID-N-1428	GP	PI	829.487	830.495	[M-H]-	C43H75O13P	12903.9	14360.5	14530.7	17215	16653.7	11409.8	12051.2	11974.5	11980.6	12250.7	11690.8	13495.8	13381.3	11220.5	16399.5	14827	15780.7	15001.6	15723.9	17847.5	14361.7	14145.4	11631.2	13154	11345.1	14476	12257.5	13794	12560.9	12038.2	12619.4	12975.3	13107.2	15598.7	15847.8	12337.9	12352.5	20078.2	11922.4	13606.2	12735.1	14195.2	16859.4
LIPID-N-1404	GP	PI	805.487	806.495	[M-H]-	C41H75O13P	97607.1	195348	184347	137945	93914.7	168920	144092	129399	81700.3	119519	189880	132510	111675	194609	158872	200988	154003	123953	114642	137958	263135	218611	94848.2	115271	137445	244894	143174	263524	247058	160609	124902	219387	214450	172915	178570	204738	185971	185293	231863	197721	157657	171921	179267
LIPID-N-1405	GP	PI	819.502	820.51	[M-H]-	C42H77O13P	39066.3	45143.8	57686.2	27720.8	24961	50387.5	44773.3	25840	26050.5	41678.6	46083.9	33043.5	41675.4	75603.1	48664.6	74758.9	40858.9	55636.5	34779	27870	95524.3	84419	36430	52497.1	58519.6	74908.1	40474.1	70564.5	69506.4	61574.7	45967.7	61955.7	59995.6	47356.6	64572.6	58243.6	59405.6	46472.3	61684.8	61573.6	59898.8	64290.3	52903.2
LIPID-N-1392	GP	PI	835.534	836.541	[M-H]-	C43H81O13P	70081.2	93204.6	113694	24364.1	47148	63028	84110.2	58027	64648.1	17728.1	43034.5	84095.2	43924.3	28832.1	69123.2	67276.9	74729.9	71008.9	70092.1	34585	94664.4	56089.3	57839.4	60790	59158.3	79200.5	63555.3	127113	83166.1	97955	69147.2	73521.7	42048.6	90269.1	70000.6	122402	92823.7	75531.3	102557	123086	55127.4	93454.1	150469
LIPID-N-1407	GP	PI	833.518	834.526	[M-H]-	C43H79O13P	73111.6	85493.1	92900.4	33436.7	47120.1	107774	105605	44979.1	25505	32714.7	47644.6	99493.1	40494.6	62208.4	68608.9	70062.7	80705.4	77060.2	61654.7	42187.2	156030	110452	29249.6	50102.6	76252.3	87110.6	56362.1	138936	105737	101250	81551.5	160011	86050.5	104763	80842.2	97313.9	100775	76298.1	115880	127631	101793	120358	142090
LIPID-N-1397	GP	PI	863.565	864.573	[M-H]-	C45H85O13P	60212.7	60122.2	154632	22689.8	63973.3	67247.5	86078.8	66318.3	18353.3	13193.8	32455.5	40910.8	56391.2	20704.2	48403.3	45188.1	87497.4	76312.4	61087.7	20248.4	141468	88347.9	58328	37626.2	32948.9	100196	46052.9	109986	77751.4	76291.3	66734.1	110904	46569.2	135343	85151.1	108194	112319	88908.5	96571.9	110995	90224.1	110080	215773
LIPID-N-0473	GP	PI	779.471	780.479	[M-H]-	C39H73O13P	19884.3	19867.5	30848.3	13767.5	8357.62	39893.7	28182.9	15235	6776.76	21178.4	6992.03	12601	9044.8	30483.9	25060.4	26428.9	21218.8	10754.1	8102.89	14438.6	65188.7	13225.6	8017.62	25112.8	17854.6	18599.7	15289	17082	23526.6	14488.5	7651.8	25384.5	25166.8	14045.6	36100.8	9838.58	7700.57	4572.17	16935	2979.73	14074.4	18429.3	21465.5
LIPID-N-0475	GP	PI	807.51	808.51	[M-H]-	C41H77O13P	42786.2	43191.7	25772.9	34130.8	37591.4	45623.4	89530.1	86379.1	47934.4	59194.9	29084.3	118051	24326.4	38657	44847	73202.8	46394.4	56186.2	82480	59796.8	36125.8	18939.1	27841.2	50253	73290.8	25778.9	30888.8	43980.4	46911.4	39179.2	29147.8	40308.6	18117.7	33201.4	21709.1	51700.8	29845.4	14992.8	22386.4	31766	29900.8	37118.4	28105.8
LIPID-N-0478	GP	PI	835.541	836.541	[M-H]-	C43H81O13P	184126	192277	286300	59425.1	167321	203570	181476	167292	90128.8	72863.9	80417.7	200429	139048	102587	245439	131311	220555	238261	212937	102644	239218	170544	124421	141762	134687	233507	170138	314144	233055	281486	191365	246760	122715	326453	209395	302982	348621	257168	315821	334208	220056	244609	377202
LIPID-N-1380	GP	PI	851.565	852.573	[M-H]-	C44H85O13P	292795	342152	271760	552464	427393	500217	466352	444470	446660	709093	561832	706136	575248	540474	595650	876812	537596	873826	755529	675070	614103	740712	688674	778766	529933	458166	469466	652470	602590	791489	411806	565921	398432	467274	415993	407977	584850	543222	682024	500402	600554	469824	545351
LIPID-N-0522	GP	PI	857.526	858.526	[M-H]-	C45H79O13P	176712	237488	204734	209335	238525	236820	345712	303906	201333	207350	145525	391976	181638	192025	284575	321339	245135	314161	325684	248437	294434	290529	225984	311109	365198	359631	282150	364074	351955	270892	270313	422580	171230	323348	199160	294992	338461	280774	310359	282164	350875	302096	430911
LIPID-N-0491	GP	PI	833.526	834.526	[M-H]-	C43H79O13P	30598.1	48424.5	44611.6	26296	22137.8	52411.5	51259.4	26808	23093.3	48292.7	18978.4	172944	24245.5	38935.5	39833.9	66972.1	52671.8	28864.7	48671.9	38677.9	46377.6	28764.6	15592	37570	94364.8	40385.7	15853.2	44027.7	47337.6	31175.5	38675.2	47551.9	30016.4	52829.8	25731.4	79089.2	22314.6	43825.8	44343.7	38485.7	33485	50222.1	30020.7
LIPID-N-1381	GP	PI	851.565	852.573	[M-H]-	C44H85O13P	47963.6	51733	54801.6	81986.2	56514.7	103426	81576	107390	87126.6	147844	92025.2	121402	89083.8	85666.4	91934.5	126284	84183.3	141961	173358	128257	110477	142042	99850.8	125718	77845.1	53929.8	80835	95143.6	107693	115512	87040.7	106522	72476.3	93092.4	84570.8	93005.9	104160	92133.4	116499	71973.7	115531	97895.9	104753
LIPID-N-0493	GP	PI	847.534	848.541	[M-H]-	C44H81O13P	98190.8	74714	77518.4	97291.1	69693	73002.3	97769.6	73205.4	78551.9	41955.6	86594.5	84973.6	70514.9	83998.3	96408.4	74972	68867.7	90160.9	76764.8	80334.4	86321.7	68668.8	76767.1	89843.9	84641	77513.6	96139.4	67885.9	96410.8	88378.5	68176.6	68693.5	69875.9	91608.6	64398.2	98195.6	74875.8	106579	68736.1	86113.8	86588.9	92120.8	73344
LIPID-N-1388	GP	PI	793.487	794.495	[M-H]-	C40H75O13P	161143	135410	132059	112971	118679	122046	107580	118841	97550.6	125450	89230.9	120825	113319	112428	95521.5	106752	94453.7	101016	70310.1	89030.9	93721	113418	96538.3	95683.6	96835.2	95004	104069	106644	89910.9	107299	114042	79198.6	125866	110625	95894.4	101818	89332.6	117341	94367.8	107885	97236.2	103647	79307.1
LIPID-N-1390	GP	PI	807.502	808.51	[M-H]-	C41H77O13P	200279	167592	146651	133335	120887	154973	122330	141971	136447	145661	111616	127962	124088	135922	119552	123917	116856	127173	107127	125196	114445	126329	118936	116212	112049	119202	110860	122684	123195	109662	117114	105111	135905	133384	114445	112975	118248	122954	117292	121898	104600	126216	94542.2
LIPID-N-0482	GP	PI	863.573	864.573	[M-H]-	C45H85O13P	204672	200170	505242	55222.2	179939	219902	237396	218555	69559.1	42178.6	76276.1	128402	158384	101843	176796	129213	230695	293807	188910	74073.7	363192	290858	192073	128765	106340	302061	195644	422483	270207	247579	233090	341822	193401	399565	303891	300704	373363	297161	285728	312416	279601	293104	644664
LIPID-N-0495	GP	PI	861.557	862.557	[M-H]-	C45H83O13P	333136	426027	739194	58539.4	233762	600262	344024	153101	47192.9	72806.7	302252	157620	156725	350624	285245	336793	489504	293553	237785	91494.3	1.61865e+06	1.0325e+06	111432	225618	342237	680209	265489	698232	578466	379882	358550	882607	644722	494934	611974	612217	626509	526757	632104	686521	493871	510363	1.0532e+06
LIPID-N-1383	GP	PI	879.596	880.604	[M-H]-	C46H89O13P	292885	272514	224998	477834	390188	476967	507612	516424	388116	521388	424185	587500	571635	529386	548774	678596	495964	728041	723043	670624	472822	674778	693057	729560	536470	452423	391117	544413	501345	531467	421334	540918	381632	389706	405750	326040	652311	439368	604552	426573	528306	376941	468953
LIPID-N-0502	GP	PI	889.588	890.588	[M-H]-	C47H87O13P	8988.57	32699.1	11189.9	33117.8	24836.5	23817.3	27399.2	16894.3	17250.9	24435.6	12223.5	19126.4	22671.8	18350.3	16253.7	24905.1	12280.6	18044.2	33233.9	3605.95	22280.2	27055.9	16253.7	22648.3	66040.2	15097.8	10856.5	24957.8	31663.1	18687.9	23747.9	15515.4	10142.3	37690.4	35197.3	40300.7	15845.1	57521.7	16535	19129.9	26265.7	13040.5	11461.2
LIPID-N-1423	GP	PI	887.565	888.573	[M-H]-	C47H85O13P	174749	203068	266544	206758	278154	362814	342629	267420	195529	145369	281592	318494	261531	343460	391620	296639	379992	437668	327727	183234	458436	422120	240924	326490	346305	445232	338925	335063	327725	387501	344943	423877	329229	325788	424711	414832	419222	452895	325025	399772	427298	412964	466022
LIPID-N-0524	GP	PI	885.557	886.557	[M-H]-	C47H83O13P	1.04227e+06	1.80474e+06	1.96102e+06	1.50177e+06	2.08368e+06	2.85466e+06	2.15847e+06	1.80304e+06	1.09383e+06	1.0844e+06	1.58841e+06	2.13678e+06	2.15675e+06	2.07657e+06	1.89938e+06	2.50427e+06	2.68455e+06	2.66323e+06	2.16329e+06	1.22899e+06	3.23724e+06	2.73149e+06	1.66564e+06	2.03783e+06	2.03823e+06	2.77757e+06	2.17262e+06	2.63536e+06	2.4455e+06	2.3642e+06	2.46782e+06	2.6996e+06	2.08023e+06	2.10056e+06	2.69765e+06	3.45551e+06	2.49607e+06	2.86009e+06	2.49451e+06	2.77953e+06	2.69535e+06	2.58716e+06	3.26409e+06
LIPID-N-0551	GP	PI	909.557	910.557	[M-H]-	C49H83O13P	13304.8	18829.3	11218.9	28382.2	28114.2	26272.1	27136.3	20590.1	15191	19073.2	30368.8	28508.6	52278.9	37070.5	28489.8	36120	33269.6	65653.6	35176.7	21770.7	25266.2	33701.2	19965.2	31813.3	28074.9	28071.9	31813.3	30874.4	43722.9	36061.3	24717.3	29943.2	17955.6	27140.3	36491.6	35171.8	47712	29940.8	34181.5	35579.2	32160.4	30423.6	49427.3
LIPID-N-1418	GP	PI	845.518	846.526	[M-H]-	C44H79O13P	103155	111378	120625	116394	131886	141585	130946	102887	164681	106938	122420	129063	125982	126203	101550	124320	115773	135454	117675	121477	122542	111324	117666	155237	102880	145911	94470.9	129075	120811	106938	123376	116918	119672	111294	124396	131665	130917	139366	88186.3	139528	134748	119573	157113
LIPID-N-0496	GP	PI	861.557	862.557	[M-H]-	C45H83O13P	213976	209354	803091	44107.9	137890	167594	190517	164214	37647.3	56922.8	88381	263795	215079	125200	289462	100064	284978	225919	180470	55133.1	561362	237577	138758	110678	146994	377580	188457	417925	339880	393219	429956	532217	180271	973196	286382	423516	447899	511396	370202	673949	405088	536632	1.38064e+06
LIPID-N-0508	GP	PI	859.541	860.541	[M-H]-	C45H81O13P	150509	163125	311670	20886.9	89441.3	192727	140137	65580.1	19459.9	43747.2	109956	135920	88554.9	144566	103800	145343	184536	115659	90034.7	21745.3	579858	296915	50414.1	93968.8	158016	360938	99118.6	309429	204688	185676	202439	440137	290130	365975	232613	236620	236126	271390	369491	305341	256624	248907	411114
LIPID-N-1441	GP	PI	883.534	884.541	[M-H]-	C47H81O13P	120557	289208	432936	220284	268976	412929	572269	212754	278665	254035	312660	1.01056e+06	279252	449202	363647	528495	510222	339587	393430	173270	1.12661e+06	403099	268727	283514	1.03232e+06	844697	274584	640191	560620	405259	639577	917552	482077	915728	504332	836650	452557	772784	895637	703375	587381	605867	663370
LIPID-N-0490	GP	PI	833.526	834.526	[M-H]-	C43H79O13P	189836	207751	262781	47999.8	98598.7	217256	198423	127996	55342.8	39144.1	90905.6	79617.2	71660.7	112807	151959	169231	149298	155949	124088	88253.8	312506	288264	114138	111232	115263	198384	148101	284930	236303	196450	168575	355370	177846	202435	174935	179181	254743	157262	264882	253590	212774	217711	367831
LIPID-N-0514	GP	PI	887.573	888.573	[M-H]-	C47H85O13P	118101	183969	301702	175573	205641	262774	217330	255986	116589	108090	218081	221106	209440	340393	169650	362829	286573	257915	217325	153860	392596	312830	199880	222611	347392	305513	238181	413733	315126	223046	221152	242021	183437	280160	300576	413535	286597	299763	322698	368919	283532	299220	319944
LIPID-N-0538	GP	PI	883.541	884.541	[M-H]-	C47H81O13P	84091.2	129033	177218	94328.9	99985.3	188633	245642	97459	134035	92863.1	135272	479088	130902	248755	181413	255720	203232	153654	200746	73338.7	462417	220276	127706	142397	501703	388836	138479	350150	271856	195398	288414	417378	226932	425894	215842	354889	209308	388220	403667	290234	301015	288406	281415
LIPID-N-1443	GP	PI	925.581	926.588	[M-H]-	C50H87O13P	23642.6	28669.8	16749.6	23928.9	25885.4	30952.9	39586.4	36031.8	24144.4	26441	12479.1	49881.1	21951.6	17464.7	29677.2	30493.1	24444	39410.2	41904.5	19620.3	40595.1	27403	34705.6	33506.3	40600.5	31462.4	36540.7	33003	37489.5	40409.9	33696	42625.4	20456	23351.9	25882.7	46773.6	28647.7	35638.6	32193.5	38873.2	37217.4	34703.2	45394.1
LIPID-N-1227	GP	PS	664.419	665.427	[M-H]-	C33H64NO10P	26363.2	14740.5	23408	15692.1	16007.6	24493.7	16823.9	20238.1	21751.3	16668.3	20487.2	19004.9	20622.8	21112	18370.6	19428.8	18838.2	18690.1	20022.4	14042.9	20419.5	19659.3	16957.4	20665.4	17670	16254.2	16849.8	17828.1	17655.2	19760.3	15564	20176.6	16010.8	19921	18698.3	14029.8	16193	18037.7	15375.6	16396.7	17035.8	17580.5	16776.8
LIPID-N-1253	GP	PS	662.403	663.411	[M-H]-	C33H62NO10P	20408.5	41014.1	58980.7	20531.1	25542.1	59906.7	24129.4	39439.1	27007.2	15345.3	24103.7	35447.8	20746.2	38875.2	24239.4	20478.9	25405.1	21573.3	19177.4	19313.1	35547	49758.8	17741.3	21389.8	23646.7	35543.7	49020.8	25565.8	23282.7	15618.7	13542.1	31034.4	38091.8	26316.5	28356.5	21093.9	20168	21318.2	25996.1	20951.5	29040.1	22017	25064.7
LIPID-N-1228	GP	PS	678.435	679.442	[M-H]-	C34H66NO10P	440535	452473	443880	460565	459626	385263	316477	321571	315752	245912	324659	305503	296244	316328	493210	405809	423906	418928	452305	460209	318124	418453	262633	275799	258350	392704	260203	340043	333293	319332	257515	352160	346500	359890	464866	305360	270407	633937	290800	283524	350843	299245	394784
LIPID-N-1284	GP	PS	702.435	703.442	[M-H]-	C36H66NO10P	25644.5	33861.5	24417	32765.3	20768.5	26378.9	29865.9	32234	30376.9	25806.1	29849.1	31551.2	32259.9	28012.8	36649.3	28533.2	34788.7	26294.8	30727.1	30178.9	26467.3	27378.9	32471.2	29761	34817.2	26818.9	28119.7	30269.6	26295.6	30011.9	36240	30732.8	30381.2	36067.5	36645.9	30870.7	30822.6	31231.8	33975	37355.7	37388.2	31032.8	30175.7
LIPID-N-1231	GP	PS	748.513	749.521	[M-H]-	C39H76NO10P	63463.9	59681.4	35296.9	80682	30148.7	34063.8	47820.1	36015.5	50070	96846.2	35115.6	122573	26966	51149	43194	40327.7	73611.4	48698.9	32849.1	41817.6	38143.8	30301.8	47178.3	54467.2	122989	47826.4	29986.3	91101.3	69666.2	57776	113098	108940	45469.8	59450.4	28837.5	92069.6	45872.5	57167.3	69909.7	64783.1	49130.2	67628.8	31608
LIPID-N-1239	GP	PS	790.56	791.568	[M-H]-	C42H82NO10P	60403.2	98202.8	85988.7	39232.5	47357.7	75216.3	51539.8	56166.2	64770.3	69635.9	54777.1	87743.9	32039.6	108312	45069.9	82519.8	73509.2	84693.1	29819.2	46656.3	103451	103454	38138.5	60330.9	122747	85302.7	83215	108865	68956.6	42529.3	116661	121363	90142.1	75213.9	106101	110407	64761.9	75800.6	92329.9	56857.8	78356.8	64573.3	76385.8
LIPID-N-1240	GP	PS	790.56	791.568	[M-H]-	C42H82NO10P	90679.2	129066	103052	119680	60026.5	109453	65937.3	95162.4	120353	129628	97064.1	137960	49188.2	127725	120701	129322	88767.4	104346	53561.9	108816	144039	104980	84314.8	115227	193518	91964.3	69621.8	106643	88353	83109	129009	142417	109205	77923.8	81101.3	128695	51723.8	112387	110747	77279.5	112015	88141.6	92191.6
LIPID-N-1264	GP	PS	788.544	789.552	[M-H]-	C42H80NO10P	26736.2	35562.9	37683.6	30344.1	32099.1	39716.1	36255.4	35122.2	53457.5	33988.3	57478	32076.8	17639.1	67670.5	40474.1	50466.5	50785.5	23604.4	21772	39243.8	95017.3	63726.1	14956.4	41525	82664	46527	25955.1	64973.9	58590.3	38185.9	58802.7	64979.6	73096.2	54119.9	43475.5	40710.1	41476	48141.1	64613.2	50100.4	38189.3	43477.8	38568.4
LIPID-N-1307	GP	PS	784.513	785.521	[M-H]-	C42H76NO10P	44257.8	108910	168786	41794.6	44888.4	248883	67488.8	52533.1	56752	95338.9	147042	145305	33585	211063	36920.2	234730	42261.7	47237.5	37851.8	52574	280402	271845	27227.1	130523	182961	171412	67239	309932	273237	87344	63940.8	322779	121518	121208	293471	312558	90309.3	95592.7	292945	108666	266908	118137	168910
LIPID-N-1246	GP	PS	832.607	817.583	[M-H]-	C44H84NO10P	239521	291833	419676	159042	206491	250861	250126	182299	163429	316732	255131	253012	206572	285211	312552	298908	235614	197389	263209	163941	389539	344556	180620	199660	340675	296773	247615	378985	311064	277879	286701	353457	306631	361721	348374	357125	285574	421406	311161	363343	259579	313751	397854
LIPID-N-1244	GP	PS	818.591	791.474	[M-H]-	C43H70NO10P	183811	244392	261254	111528	153220	216791	132229	142672	150551	153758	181193	163365	120112	246997	192346	258978	172030	183977	132053	108823	264035	328051	132954	208960	242400	232744	199261	291314	227294	169534	223052	297143	238718	161400	243702	233613	195496	240916	261461	165535	201911	193382	191584
LIPID-N-1259	GP	PS	746.497	749.521	[M-H]-	C39H76NO10P	285845	275518	594563	513510	570528	871953	772848	472401	395106	1.48213e+06	1.01001e+06	800348	689382	884903	1.63642e+06	1.6224e+06	814228	895384	921477	686783	1.56896e+06	1.37154e+06	505921	850524	1.53106e+06	1.37446e+06	849598	1.53864e+06	1.45431e+06	1.45654e+06	1.26414e+06	1.51251e+06	753914	918854	1.13966e+06	1.43171e+06	1.0878e+06	1.61912e+06	1.40495e+06	1.44153e+06	1.42186e+06	1.25916e+06	1.52611e+06
LIPID-N-0568	GP	PS	760.513	761.521	[M-H]-	C40H76NO10P	125812	130765	107836	145599	122594	100134	156659	89002.9	140655	231646	183160	77902.5	103373	137793	172968	211403	132705	155776	117284	100126	119002	94173.9	82331.6	158134	192043	151489	147304	121773	124964	95931.3	116404	116439	108743	145495	81341.2	173907	83184.6	154968	127559	189533	84784.3	100869	65924.4
LIPID-N-0563	GP	PS	790.56	791.568	[M-H]-	C42H82NO10P	128134	310239	350757	326403	385980	997797	615644	492062	212301	836669	752823	1.15545e+06	506946	766674	476521	1.47085e+06	539234	832047	761227	609817	1.44605e+06	1.36253e+06	400160	907130	769191	836198	584392	1.10392e+06	1.31011e+06	589250	458234	1.54865e+06	409369	718913	978054	988385	1.07675e+06	686200	1.54927e+06	541079	1043487	844162	1.17657e+06
LIPID-N-0570	GP	PS	788.544	789.552	[M-H]-	C42H80NO10P	41652.7	190794	50970.2	49306.1	53769	42224	39237.1	64378.9	82207.4	20375	137381	340200	36488.2	20246.9	20055.7	38278.7	25024.4	21569.7	20457	87680.4	26979.3	51579.9	6390.07	35558.1	24308.9	39190	25642.9	41204.2	32611.3	34557.7	15641.2	23949	36309.9	57112.6	252034	21370.4	49963.8	32190.5	17322	25024.6	93790.4	28467.1	56552.1
LIPID-N-1297	GP	PS	814.56	817.583	[M-H]-	C44H84NO10P	33679.9	33061.5	38638.1	91091.8	84192	76714.1	91048.1	91045.8	58172.1	204667	132368	117173	132357	112120	225169	189738	86834	143305	147549	112131	166116	152609	77460.6	102012	170334	175424	142499	241186	244494	200115	186354	184699	74182.1	161886	129008	242900	185480	215025	229221	215040	182305	194805	179646
LIPID-N-0589	GP	PS	810.529	811.536	[M-H]-	C44H78NO10P	816839	833772	831355	816305	1.208e+06	1.09621e+06	1.25385e+06	829593	905547	1.61929e+06	1.25827e+06	757381	1.03685e+06	1.42661e+06	1.58375e+06	2.13949e+06	1.37273e+06	1.33522e+06	1.06975e+06	800108	1.23004e+06	1.21722e+06	777149	1.29941e+06	1.54969e+06	1.72513e+06	1.39093e+06	1.23361e+06	1.55992e+06	1.51284e+06	1.3439e+06	1.37551e+06	1.52098e+06	1.34612e+06	1.22066e+06	1.85497e+06	1.35112e+06	1.78527e+06	1.42455e+06	1.89667e+06	1.04967e+06	1.33364e+06	1.19283e+06
LIPID-N-1247	GP	PS	832.607	817.583	[M-H]-	C44H84NO10P	5.09242e+06	7.48278e+06	8.14888e+06	4.452e+06	5.00735e+06	8.58568e+06	5.9436e+06	4.27912e+06	3.83982e+06	6.99431e+06	6.90356e+06	5.95803e+06	5.04772e+06	9.51437e+06	5.56229e+06	9.3542e+06	4.60062e+06	5.05053e+06	4.66376e+06	3.75072e+06	1.04701e+07	1.04103e+07	4.91236e+06	6.25958e+06	9.15946e+06	7.8644e+06	5.31677e+06	1.02912e+07	8.71996e+06	5.26388e+06	5.75586e+06	9.29354e+06	7.95834e+06	6.28592e+06	8.67761e+06	8.86283e+06	5.21739e+06	6.62953e+06	9.29157e+06	5.59805e+06	6.7187e+06	5.48388e+06	6.63536e+06
LIPID-N-1249	GP	PS	846.622	829.583	[M-H]-	C45H84NO10P	178155	279542	291594	155621	168884	312547	214799	155357	140235	252683	236140	198045	180754	350401	189331	340944	158862	177632	166080	128258	378513	373842	174889	220903	334763	283736	181229	385203	308703	177857	184283	339625	288427	215027	309988	315499	193515	225990	331643	182621	229441	187560	240151
LIPID-N-1278	GP	PS	844.607	829.583	[M-H]-	C45H84NO10P	436827	549714	641062	358622	443372	510092	532267	370078	260702	366467	429406	343610	497641	598344	550469	611549	533488	478777	382578	346278	949757	827578	430089	457243	555386	734063	524311	925051	689212	681374	571662	866366	716383	600094	719601	623704	683234	623059	804047	715192	717782	655070	900034
LIPID-N-0595	GP	PS	836.544	837.552	[M-H]-	C46H80NO10P	16127.7	42233.2	47595.2	32049.6	71732.4	121757	47634.5	61879.6	68257.3	89773.3	46721.9	53898.9	40534.9	88380	78358.9	94385	57717.3	67233.6	68540.3	68541.5	94571.9	61665	40531.3	50503.5	64940.3	72066.4	46143.7	55844	60069.1	113619	56750.8	60209.1	48389.7	41485.7	37636.5	69898.7	56812.8	72622.4	74846.5	47798.6	61960.3	61054.5	64041.4
LIPID-N-1250	GP	PS	860.638	861.646	[M-H]-	C47H92NO10P	29236	34168.7	46893.7	26008	29441.3	41575.6	34543.5	32481.8	22721.9	44171.8	32951.2	27126	31931	44378.3	32237	43401.6	25456.9	31649.3	35575	24287.2	56446.1	48472.2	32068.9	32459.2	48217.6	40243.1	32505	59427.5	43651.8	24681.9	30550.5	48510.2	42397.5	35769.8	45573	43519.1	30157.3	40921	45810.3	31166.7	37838	31342.4	40066.7
LIPID-N-1252	GP	PS	874.654	845.521	[M-H]-	C47H76NO10P	7591.18	5930.88	4141.85	6490.82	5286.7	6031.06	5685.37	4893.84	6546.2	9691.36	4168.92	4301.37	2405.23	4055.35	5978.35	4226.54	3996.31	5455.49	2740.4	6001.58	4706.72	6073.58	4195.72	3831.15	3950.35	4022.26	5455.53	3652.27	4030.85	3657.9	4060	4507.51	2853.18	2701.73	3743.22	4420.42	3983.57	5265.75	3333.81	4309.56	3199.19	4991.86	3019.21
LIPID-N-0571	GP	PS	802.56	803.568	[M-H]-	C43H82NO10P	50367.9	45384.6	50370.6	37712.7	57082.5	53747	45947.5	33501.3	46119.4	61218.7	53732.8	24121	42987.5	67209.5	55609.8	74657	52749.4	50366.9	47790.3	32571.4	41874.6	46019.6	34702.5	47647.3	60427.5	72432.2	50538.9	50619.8	70076.1	56643.2	47880.7	53977.8	50127.2	59901.7	57871.3	75038.5	44249.5	64503.2	52860	65022.6	33404.4	42371.1	39892.6
LIPID-N-1312	GP	PS	812.544	817.583	[M-H]-	C44H84NO10P	270253	342896	415817	325254	213824	335589	314150	247188	238624	363500	289092	339813	258535	412928	221813	436801	247795	249912	344165	280926	443869	362746	298852	323263	387964	466500	234061	450492	386019	283621	297999	338555	315895	282917	385057	419925	299436	345013	415030	327948	313227	367406	363382
LIPID-N-1322	GP	PS	810.529	817.583	[M-H]-	C44H84NO10P	50041.5	91322.2	395126	31233.4	110301	172167	113532	98533.4	41893.6	82419.1	149442	180909	121274	172861	99385	160786	120401	116173	58855.3	44265.1	433479	420809	93363.6	85299.7	135028	319010	134124	425568	480732	255546	231142	668535	193873	670447	431164	407710	410945	404443	548520	440375	370319	416101	892999
LIPID-N-1331	GP	PS	808.513	817.583	[M-H]-	C44H84NO10P	18378.2	43307.5	123888	21565.4	48500	91241.8	58029.3	50238.3	24366.5	81409.2	90079.8	91801.3	65825.1	95279.4	57162	150908	82289.2	73069.9	43305.2	26871.4	329924	193181	52201	46109.4	98754.6	186291	52734.8	279929	264587	127634	92979.9	277706	87483.6	277300	194950	238500	188600	176755	291560	189733	201045	199283	330001
LIPID-N-1316	GP	PS	840.575	841.583	[M-H]-	C46H84NO10P	70536	119956	103211	49151.1	60238.9	123687	68395.1	45530.7	46650.8	96197.8	80581.7	79261.5	66389.9	144862	69015	140562	67637.4	57207.8	64316.7	44018.1	103799	145617	62601.2	65767.2	121252	98402.5	65291.5	145265	113852	61886.8	70869.1	136296	112874	77744.6	105843	103163	64845	88768.8	122592	75259.1	92392	62817.2	76719.4
LIPID-N-1335	GP	PS	836.544	825.458	[M-H]-	C46H68NO10P	53129.8	34165.1	76619.6	12343.3	39280.9	55813.1	53423.1	48917.6	31385.6	24569.8	32208.5	44684	51958.5	39747.9	51354.2	34292	54204	50381.8	59897.5	30433.8	71288.7	78369.9	32365.2	37495.4	32870	54242.9	51558	55208.1	76853.8	50216.9	49437.3	46801	40656.9	98429.3	41154.7	65608.1	91721.9	73782.2	71871.3	57087.6	69258.4	63721.4	113869
LIPID-N-1321	GP	PS	782.497	785.521	[M-H]-	C42H76NO10P	76366.6	185240	326045	86161.7	84072.7	471789	192724	118227	57054.9	334770	406714	367161	176073	422415	159422	540164	148916	200605	121748	91965.6	866493	592197	119984	251108	524430	497960	237433	802277	704540	320907	213362	723752	236573	362853	540945	690351	424262	275104	789815	433068	487508	549791	616704
LIPID-N-1323	GP	PS	810.529	817.583	[M-H]-	C44H84NO10P	162907	220363	169719	102794	95925.8	152478	128141	126501	73617.4	133644	163669	128521	146233	153476	127871	129120	150877	146376	151746	146510	217397	248020	89884.9	123947	155363	201138	177472	267421	198280	118223	91369.6	209617	212927	181263	158913	173601	160467	117141	209770	176135	185769	118384	244084
LIPID-N-1332	GP	PS	808.513	817.583	[M-H]-	C44H84NO10P	52262.6	94430.6	284724	51813.5	62944.9	167786	182142	90639.6	16004	148562	144365	199003	151933	226676	159342	280046	215901	111258	87290.3	21837.8	775258	393997	97795.5	98631.2	228380	512663	169273	572402	473605	297670	233629	671833	167051	579059	354490	547993	464922	440318	706824	514239	448940	580754	766115
LIPID-N-1365	GP	PS	830.497	825.458	[M-H]-	C46H68NO10P	9595.46	19094.5	29316.6	65194.4	35979.2	63685.5	58792.9	49234.9	37569.9	103603	67322.4	131979	33524.4	48895.2	50812.4	101704	70036.2	107370	75155.3	66171.8	74700.9	98675.3	43074.1	80469.2	90099.2	50256.8	65327.7	73008.8	84776.5	64437	65189.6	113792	22029.3	74628	70176.2	93454.2	87230.8	54046.9	161103	59740.4	86277	139052	108875
LIPID-N-1269	GP	PS	802.56	803.568	[M-H]-	C43H82NO10P	873031	1.45328e+06	1.59594e+06	1.04863e+06	587824	1.52632e+06	1.0392e+06	874288	787010	2.4422e+06	1.36824e+06	3.20697e+06	700079	2.32096e+06	886018	2.17397e+06	1.25723e+06	797905	643673	768017	1.76272e+06	1.79213e+06	639638	1.12128e+06	2.551e+06	1.44146e+06	686909	1.85928e+06	1.6472e+06	604932	1.38557e+06	1.63593e+06	1.51882e+06	1.64202e+06	1.42829e+06	2.18064e+06	670835	1.02563e+06	1.76079e+06	726537	1.18492e+06	901611	605794
LIPID-N-0590	GP	PS	824.544	825.552	[M-H]-	C45H80NO10P	49157.7	52614.7	57827.2	37167.3	68256.7	55072.1	90319.9	36725.1	54632.8	93632.2	69532.7	90829.9	77706.5	77117.9	64037.1	90881.7	68861.8	81606.8	63005.1	41575.9	50485.9	66094.5	31124.5	71242.1	75733.3	128597	80224.1	71600.3	80936.6	74096.1	52671.4	92944.6	71601.5	85376.4	66092.1	267500	205172	88114.7	106586	112208	54748.5	76859.4	56827
LIPID-N-1273	GP	PS	816.575	817.583	[M-H]-	C44H84NO10P	76913.1	170761	180857	80542.1	37673.1	167624	63673.6	45941.6	70696.5	103828	88103.3	115787	51762.4	170772	63563.5	125236	89853.9	70705.4	47972.6	32099.3	150171	138001	54219.5	81058.2	151673	128380	81180.9	136097	112028	60468.7	150689	158168	124747	94395.4	85995	151372	64306.1	112649	122458	69307.8	147846	71640.6	69435.9
LIPID-N-1298	GP	PS	814.56	817.583	[M-H]-	C44H84NO10P	77365.4	151242	160245	85674	75918	193627	91237.2	77714.5	100713	157883	192937	74908.5	67220.5	193955	110629	196424	140102	77931.1	57072.7	105032	288052	216292	58465.4	146617	212749	230605	118254	309409	283434	168694	200415	306240	173140	175317	224770	196090	146993	182830	246173	207350	146039	142839	151607
LIPID-N-1324	GP	PS	838.56	839.568	[M-H]-	C46H82NO10P	457939	520180	512003	849456	858630	836428	757873	778373	1.04613e+06	1.44175e+06	980447	763801	861515	858154	1.07507e+06	1.06671e+06	1.06763e+06	801072	907421	839145	990793	941935	962173	833810	1.28993e+06	1.08356e+06	925809	946614	1.20563e+06	1.19317e+06	1.27509e+06	933855	691355	1.12866e+06	812154	1.36205e+06	916262	1.89563e+06	1.11654e+06	1.05099e+06	823027	942850	836393
LIPID-N-1251	GP	PS	860.638	861.646	[M-H]-	C47H92NO10P	26277.2	37984.3	55765.8	12587.1	18804.4	27151.8	25244.6	18173.6	13607.6	20649.5	21086.4	18766.2	19629	27827.8	29269.9	26767.3	22979.7	21769.5	20019.7	12549.1	45356.8	42014.5	22932.7	21026.7	26377.6	42531.9	22858.2	54386.4	39877.1	31586.8	33464.3	43194	42986.3	52698.9	44590.3	39205.6	44734	43133	44771.6	33356.3	28702.7	36597.6	43231.4
LIPID-N-1326	GP	PS	866.591	867.599	[M-H]-	C48H86NO10P	40427.8	66693.5	52150.4	79181.1	93952.2	87287.3	72355.7	93660.2	105304	160140	127996	71066.6	92500.7	100766	118543	116663	99217.8	92601.9	93897	75372.8	115965	104729	103095	95489.4	156876	129851	99392.8	122744	156635	139085	168217	119243	80565	137563	107920	165217	106787	217415	132908	127630	82211.6	96872.8	84069
LIPID-N-1350	GP	PS	862.56	863.568	[M-H]-	C48H82NO10P	19952.9	28724.4	22684.2	20440.6	37180.9	45414.6	34686.4	31916.1	28724.4	85376.5	43354.5	38016.7	36571.2	48691	61443.7	71375.1	41358	58277.9	48689.8	55362.3	67813.1	54699.5	41355.3	47208.4	58033.6	69381.1	44028.9	56026.7	50692.5	89478	74805.5	86050.2	43885	68698.9	38690.7	68703	50751.5	107402	74789.7	67366.6	44076.9	92056.5	50035.1
LIPID-N-1336	GP	PS	836.544	825.458	[M-H]-	C46H68NO10P	87024.2	124866	114822	149131	156394	191820	172770	111369	120730	287912	210592	93100	181996	194624	185263	259312	202681	198666	174673	110763	172220	198411	126742	227027	187943	270262	242255	191707	260556	229686	220632	223400	156114	188676	161292	241909	197795	386012	184027	319615	142691	119898	186243
LIPID-N-1361	GP	PS	832.513	825.458	[M-H]-	C46H68NO10P	24267	29663.2	85603.1	50274	55712.5	86350.6	81745.2	98925.2	42276.9	102791	95610.3	169583	80269.8	95693.7	71243.6	118602	72029.9	68401.4	49584.5	21634	214782	148470	52315.9	64037.4	111439	167833	131574	133716	142532	116163	126693	205755	43238.1	192965	154530	206697	156381	123127	196821	134113	133381	177716	170333
LIPID-N-1270	GP	PS	802.56	803.568	[M-H]-	C43H82NO10P	374039	634057	637579	479983	271892	628960	466776	365226	366903	1.35014e+06	616247	1.55163e+06	359495	922493	439805	999993	647205	395016	363147	385121	700593	763911	286005	480291	1.22931e+06	669054	324859	731201	604242	306049	594249	684377	587305	642144	589974	1.00308e+06	273930	544098	672494	367559	493627	454482	290588
LIPID-N-1274	GP	PS	816.575	817.583	[M-H]-	C44H84NO10P	25521.3	72602.4	76302.6	31318.2	25666.9	71172.9	29461	24836.8	33287.2	43936.7	32663.5	69154.4	21166.7	67328	31328	64037.8	42266.1	42396.8	26900.7	11568	73857.5	61477.5	25056.4	33282.4	66224.4	72363.3	37782.9	50585.8	42912.3	31869.5	64239.3	64685.9	52309.5	35170	58688.5	78299.7	39185.4	63396.8	51667.9	32664.7	58497.4	42913.5	26899.5
LIPID-N-1315	GP	PS	826.56	827.568	[M-H]-	C45H82NO10P	67415.5	104352	168455	45345.9	47422.7	83536.5	71229.4	53066.5	32021.2	88440.3	103269	144927	63321.2	152949	119210	135412	105955	61200	44302.7	12569.9	339734	319383	59072.2	60344.5	213695	203590	95536.5	206385	185105	79957.2	175879	308669	190959	245372	197631	165617	166472	142106	185674	188667	154392	139313	303985
LIPID-N-1280	GP	PS	858.622	859.63	[M-H]-	C47H90NO10P	94470.8	127132	229415	47364.6	66843.5	96003.4	101855	49437.3	42720.3	108224	79267.7	82477.6	86757.5	110337	125139	94823.8	95859.5	67635.2	88400.1	37858.8	199418	144558	72023.4	59992.7	107490	149033	82345.5	183696	134790	128131	135391	184852	115944	208437	174928	162700	140092	182536	148350	206836	84422.8	157764	207983
LIPID-N-1354	GP	PS	876.575	889.677	[M-H]-	C49H96NO10P	26335.9	66169.1	57614.4	67311.6	66227.3	92421	78596.3	63347.9	72188.7	122163	130263	187100	114599	114605	110228	159994	99888.5	130718	110433	60739.4	134321	160083	96423.3	93978.8	106716	128610	72838.6	138224	132908	107350	99498.1	110378	89158.2	136129	90089.8	83889.9	128438	144750	174619	115017	114880	98711.2	142435
LIPID-N-1283	GP	PS	914.685	885.552	[M-H]-	C50H80NO10P	3868.46	6917.44	6206.9	3541.53	3300.09	4521.13	4922.29	3735.65	7563.78	4178.03	4058.47	3705.31	3195.12	5838.25	5404.72	5190.74	4412.95	4702	3518.61	3720.97	5318.11	6283.97	3977.84	5553.22	8859.64	5695.08	3247.32	3486.85	5922.82	4536.55	6972.35	6174.81	4546.63	8413.25	5229.22	5952.1	5587.35	11589.9	5674.34	6242.9	5510.8	7195.51	5784
LIPID-N-1348	GP	PS	848.544	849.552	[M-H]-	C47H80NO10P	7694.15	23804	27007.7	30128.4	22764.2	46589.5	31813.7	34067.9	14510.3	32564.8	42841.7	54353.9	34927.5	45785.2	26258.9	74769.3	30425.3	33314.9	21919.2	30811.9	89269.8	66262.4	20047.2	31881	50760.9	62050	43509.2	87163.3	84492.3	29058.1	33068.5	67630.5	28133.5	37289.8	70088.4	69382.3	49485	29396.2	70513.9	48021.7	62019.8	75032.3	76785.7
LIPID-N-1353	GP	PS	862.56	863.568	[M-H]-	C48H82NO10P	61388.1	56602.4	48884.9	109617	81307.2	89813.2	88477.4	99908.7	101610	96457.6	88215.9	86621.9	112185	73601.5	91927.1	82551.5	86355.5	76158.8	86358.8	105747	79712.1	122762	98311.5	116650	81571.4	75453.9	91135.3	68015.2	86627.7	77932.7	78384.5	99366.8	81305.2	61380.3	83969	55181.8	102567	59524.3	91607.8	72545.9	93265.3	59545	84229.9
LIPID-N-1281	GP	PS	858.622	859.63	[M-H]-	C47H90NO10P	252892	316054	560186	92075.2	151345	212073	246748	106764	84453.6	221585	184575	180413	217121	241735	349214	243436	247480	155173	195832	63427.7	503408	370538	158520	139843	248578	406060	200002	466080	333443	333819	370614	493147	301478	555564	420449	393548	379768	481751	381537	580896	222037	447283	562773
LIPID-N-1303	GP	PS	856.607	857.615	[M-H]-	C47H88NO10P	466579	614212	993607	91526.6	230853	259013	474989	162122	83196.8	164438	228973	158133	395244	311076	862003	296290	673936	215970	268318	59438	1.49638e+06	791617	240322	158524	277561	834607	310760	1.1384e+06	651362	870352	848796	1.25168e+06	622644	1.18852e+06	914894	645147	853739	775145	838538	1.41551e+06	444182	1.29009e+06	1.47647e+06
LIPID-N-1327	GP	PS	880.607	889.677	[M-H]-	C49H96NO10P	85817.3	86382.3	116308	99103.8	79963.9	84993.3	111540	72616.3	87531.5	102784	107283	93148.5	119741	110204	183800	117438	144398	74758	109563	54983	245945	195156	91772	91182.6	111039	210403	121800	211961	168267	157415	206679	243678	135355	180690	171149	171702	182102	214505	170037	210694	108392	156271	180175
LIPID-N-1282	GP	PS	886.654	889.677	[M-H]-	C49H96NO10P	14716.6	17852	21434.1	8485.94	9719.38	15164.3	10878.8	9300.72	11251.5	13938.4	10328.9	9082.85	10648	13287.8	16924.8	12559.1	12708.1	10598.4	12074.2	7217.52	20237.6	16712.2	10306.8	10943.7	17217.5	16777.3	12039.2	20355.4	16178	14130.2	20551.9	17661.6	14554.9	20945.7	16434.6	17950.8	14784.3	25845.4	14074.1	20320.8	13189.2	16909.7	16530.7
LIPID-P-0100	SP	SPH	380.257	379.249	[M+H]+	C18H38NO5P	67335.5	86445.6	149446	202968	176637	152175	123630	189650	242355	106205	55718.7	229598	76458.2	61643.4	196846	115274	114205	15402.8	145775	24134.6	103253	26003.8	13447.2	111907	145701	151677	234231	124571	8457.2	252459	62273.9	60955	190109	83968.4	77368.1	59815.8	36825.9	147107	27671.3	94830.7	76600.7	14647	90944.8
LIPID-P-0101	SP	SPH	378.241	377.233	[M+H]+	C18H36NO5P	38979.9	23501.1	47831.3	62893.1	48329.8	43383.3	98812.4	91979.6	152159	41864.6	28686.2	54939.4	56792.5	60454.3	208504	74123.9	66205.8	14487.3	66097.9	21877.2	66947.1	20937.6	13639.7	140206	104026	107455	140318	81268.3	10411.4	187154	59704.6	59484.4	53581	46445	29783.6	24874.6	13043.1	66328.1	23107.2	36369.3	62652.9	10962.8	29306.3
LIPID-P-0331	SP	SHexCer	796.8	795.517	[M+H]+	C40H77NO12S	247213	689942	804922	57143.3	86185	1.02677e+06	114077	72059.7	83946.4	272671	421250	170209	33940.1	745834	120359	688527	64743.8	67983.1	67199.1	115873	925434	836271	51305.5	276930	501921	505160	258358	904033	684111	89978.2	72004.2	641963	591797	76024	667139	521778	93628.8	175073	545885	158034	322857	116203	103432
LIPID-P-0332	SP	SHexCer	780.8	779.522	[M+H]+	C40H77NO11S	632256	847954	915314	531500	697981	1.30292e+06	737761	477823	492320	1.01253e+06	613700	474504	180732	720279	851331	898866	577294	460274	507058	862940	736898	1.10403e+06	343074	461337	713231	766734	1.08907e+06	623716	1.02969e+06	515592	322293	829874	532407	429858	717457	767690	593322	975924	908869	604514	502342	482060	493659
LIPID-P-0334	SP	SHexCer	892.8	891.647	[M+H]+	C48H93NO11S	65028.2	168144	206850	63911.7	128963	201265	114275	85457.1	48906.7	66192.9	67207.5	62554.5	60565	91132.6	84958.2	222000	111221	88575.4	115613	56698	153519	204529	54524.9	45314.2	106801	105543	103203	177228	117812	144654	53879.7	160447	86624.1	44998.7	108471	91653.7	87997.7	81775	181867	70911.7	123474	54306.7	268404
LIPID-P-0727	SP	SM	649.528	648.521	[M+H]+	C35H73N2O6P	1.42268e+06	944064	1.8561e+06	320648	285904	595762	974319	400999	361041	357229	598982	272838	524393	2.0484e+06	567018	696821	1.28604e+06	300057	122891	120433	4.70997e+06	2.61667e+06	173381	356846	622059	2.09897e+06	370201	5.06035e+06	1.33627e+06	1.16668e+06	1.84015e+06	3.36511e+06	1.47526e+06	690924	1.76154e+06	1.88583e+06	1.07612e+06	1.14166e+06	2.21831e+06	1.93208e+06	639614	1.90354e+06	1.30125e+06
LIPID-P-0729	SP	SM	677.56	676.552	[M+H]+	C37H77N2O6P	7.35995e+06	5.67921e+06	7.8244e+06	6.28908e+06	3.62816e+06	4.67821e+06	5.95943e+06	4.06736e+06	4.5759e+06	5.36456e+06	3.79624e+06	3.00735e+06	3.82074e+06	5.25057e+06	4.10337e+06	5.19606e+06	5.67253e+06	4.14605e+06	4.40183e+06	4.92224e+06	1.24119e+07	7.4085e+06	4.27247e+06	3.76775e+06	5.97024e+06	8.84246e+06	3.30181e+06	1.30616e+07	6.2998e+06	6.08072e+06	1.13917e+07	1.19364e+07	5.681e+06	5.40754e+06	7.04615e+06	9.07516e+06	5.64399e+06	7.20107e+06	8.98181e+06	8.23449e+06	4.91742e+06	8.66243e+06	8.44231e+06
LIPID-P-0730	SP	SM	705.591	704.583	[M+H]+	C39H81N2O6P	2.0527e+06	1.32108e+06	1.93746e+06	2.39314e+06	1.81817e+06	1.93291e+06	2.00286e+06	1.58191e+06	2.30827e+06	2.32883e+06	1.5707e+06	1.34453e+06	1.72125e+06	1.73385e+06	1.66268e+06	2.0794e+06	1.72364e+06	1.73089e+06	1.48924e+06	1.59544e+06	2.03213e+06	2.05376e+06	1.04986e+06	1.37478e+06	1.88483e+06	2.02995e+06	1.2763e+06	2.19971e+06	1.53293e+06	1.6207e+06	2.07324e+06	1.89859e+06	1.86585e+06	1.5823e+06	1.76848e+06	2.12454e+06	1.4081e+06	1.57547e+06	1.75104e+06	1.74011e+06	1.74258e+06	1.8409e+06	1.72923e+06
LIPID-P-0731	SP	SM	719.607	718.599	[M+H]+	C40H83N2O6P	5.61962e+06	5.8649e+06	4.3488e+06	6.37145e+06	6.75039e+06	5.1153e+06	4.69785e+06	6.01099e+06	7.6635e+06	1.00932e+07	6.54433e+06	4.42711e+06	4.79051e+06	6.80455e+06	7.02467e+06	7.75819e+06	7.40729e+06	6.16649e+06	5.32258e+06	8.04832e+06	5.55991e+06	5.17561e+06	4.21133e+06	7.03987e+06	8.59877e+06	5.69262e+06	5.37456e+06	6.56612e+06	5.64803e+06	6.2556e+06	6.69346e+06	5.16656e+06	4.63822e+06	4.00188e+06	5.05834e+06	8.40047e+06	3.78495e+06	5.76321e+06	4.81534e+06	5.46647e+06	4.91182e+06	5.89965e+06	4.98404e+06
LIPID-P-0732	SP	SM	733.622	732.615	[M+H]+	C41H85N2O6P	6.82474e+07	5.32465e+07	7.47778e+07	1.20085e+08	1.07433e+08	8.43287e+07	9.21839e+07	8.36057e+07	8.4673e+07	1.06762e+08	6.8028e+07	5.67002e+07	8.78917e+07	9.25232e+07	8.45985e+07	1.02179e+08	8.61886e+07	8.27441e+07	6.78197e+07	7.40116e+07	8.88409e+07	8.36766e+07	3.84117e+07	6.50042e+07	6.94256e+07	7.97369e+07	5.32926e+07	1.143e+08	6.22395e+07	6.58122e+07	8.31472e+07	4.57185e+07	5.51807e+07	4.63682e+07	7.32265e+07	9.58299e+07	5.62014e+07	7.66097e+07	6.23313e+07	6.20604e+07	7.03068e+07	9.31052e+07	8.9035e+07
LIPID-P-0733	SP	SM	761.654	760.646	[M+H]+	C43H89N2O6P	1.94058e+07	1.29245e+07	2.34812e+07	2.82448e+07	1.78641e+07	1.81634e+07	2.20019e+07	1.84269e+07	2.26669e+07	1.7775e+07	1.48051e+07	1.22367e+07	1.7204e+07	2.05939e+07	1.8173e+07	1.82841e+07	1.88469e+07	1.74235e+07	1.22047e+07	1.48795e+07	2.12558e+07	2.12773e+07	1.01067e+07	1.68852e+07	1.74276e+07	1.99223e+07	1.26136e+07	2.67129e+07	1.51047e+07	1.63109e+07	2.10157e+07	1.39994e+07	1.46855e+07	1.52868e+07	1.79948e+07	1.87502e+07	1.50191e+07	2.01391e+07	1.69771e+07	1.66861e+07	1.56771e+07	2.07397e+07	2.29595e+07
LIPID-P-0734	SP	SM	789.685	788.677	[M+H]+	C45H93N2O6P	2.35747e+07	1.31219e+07	2.64525e+07	3.22581e+07	1.97935e+07	2.53698e+07	2.82977e+07	2.15408e+07	2.7441e+07	2.13439e+07	1.53777e+07	1.59504e+07	1.85271e+07	2.27931e+07	2.26367e+07	1.93299e+07	2.40526e+07	2.51716e+07	1.54484e+07	1.7273e+07	2.54641e+07	3.02956e+07	1.38424e+07	2.24221e+07	1.67199e+07	2.76372e+07	1.47704e+07	2.96311e+07	1.96655e+07	2.31472e+07	2.32609e+07	1.52893e+07	2.30548e+07	1.86596e+07	2.37814e+07	1.82851e+07	2.1546e+07	1.89325e+07	1.88336e+07	1.74368e+07	2.11433e+07	2.49196e+07	2.37608e+07
LIPID-P-0735	SP	SM	647.513	646.505	[M+H]+	C35H71N2O6P	3.38771e+06	1.9897e+06	4.07531e+06	922255	1.36886e+06	1.27255e+06	3.15621e+06	1.88628e+06	1.36856e+06	1.59051e+06	1.28701e+06	693353	1.03407e+06	2.23793e+06	1.26761e+06	1.57977e+06	4.23676e+06	2.27235e+06	1.03555e+06	1.27969e+06	2.33766e+06	1.96299e+06	1.4958e+06	1.617e+06	2.46906e+06	4.26608e+06	1.68683e+06	7.03022e+06	3.76813e+06	3.74075e+06	8.26924e+06	8.16794e+06	2.989e+06	3.89789e+06	4.1499e+06	4.3712e+06	4.78133e+06	4.76455e+06	6.69038e+06	7.39012e+06	1.93822e+06	5.90162e+06	3.95484e+06
LIPID-P-0736	SP	SM	675.544	674.536	[M+H]+	C37H75N2O6P	794131	558191	943138	391922	438475	847297	668147	508849	520567	958912	772746	351322	489537	890447	682469	839827	862097	664219	395075	464995	810655	831931	423631	660804	1.0668e+06	957738	607418	999194	957829	734843	999255	1.3811e+06	822885	671973	863806	1.05836e+06	957501	824095	1.08212e+06	900512	730401	842778	869428
LIPID-P-0737	SP	SM	689.56	688.552	[M+H]+	C38H77N2O6P	2.80437e+07	1.8452e+07	2.72622e+07	1.37281e+07	1.83789e+07	2.13673e+07	2.08043e+07	2.18661e+07	2.28814e+07	2.9279e+07	2.33383e+07	1.36743e+07	1.78676e+07	2.79058e+07	3.03146e+07	3.62403e+07	2.96834e+07	2.82737e+07	2.00559e+07	1.88969e+07	2.77611e+07	2.99005e+07	1.59806e+07	2.51933e+07	4.28472e+07	3.38423e+07	2.15952e+07	3.30011e+07	2.69684e+07	3.10134e+07	3.23742e+07	4.03736e+07	2.844e+07	2.39475e+07	2.76009e+07	3.17786e+07	2.73341e+07	2.93151e+07	3.57152e+07	2.76874e+07	2.23804e+07	2.94054e+07	2.80752e+07
LIPID-P-0738	SP	SM	703.575	702.568	[M+H]+	C39H79N2O6P	9.75304e+06	1.01474e+07	1.29892e+07	7.79946e+06	9.72228e+06	1.1227e+07	1.00497e+07	8.58825e+06	8.95913e+06	1.29377e+07	1.08421e+07	6.45805e+06	7.96132e+06	1.18846e+07	1.05134e+07	1.54922e+07	1.03778e+07	9.74066e+06	8.38796e+06	8.17884e+06	1.32638e+07	1.30138e+07	7.67825e+06	1.04648e+07	1.54127e+07	1.13069e+07	9.56214e+06	1.28588e+07	1.41147e+07	1.15383e+07	1.05772e+07	1.17175e+07	1.18401e+07	9.54063e+06	1.17442e+07	1.34374e+07	8.58851e+06	1.17133e+07	1.19943e+07	1.07797e+07	9.30379e+06	1.1352e+07	8.74103e+06
LIPID-P-0750	SP	SM	701.56	700.552	[M+H]+	C39H77N2O6P	2.05433e+06	1.15939e+06	1.77476e+06	1.2331e+06	1.38209e+06	2.2148e+06	1.85459e+06	1.44256e+06	1.56856e+06	2.82117e+06	1.97957e+06	1.18861e+06	1.17114e+06	1.83812e+06	1.84896e+06	2.94728e+06	1.64747e+06	1.78921e+06	1.38482e+06	1.52863e+06	1.84526e+06	1.48026e+06	1.1384e+06	2.08946e+06	2.33159e+06	1.91946e+06	1.33699e+06	2.12191e+06	1.97341e+06	1.65678e+06	1.71364e+06	1.98602e+06	1.55901e+06	1.51645e+06	1.64176e+06	2.58233e+06	1.30243e+06	1.4449e+06	1.81855e+06	1.61006e+06	1.73661e+06	1.79377e+06	1.30105e+06
LIPID-P-0739	SP	SM	717.591	716.583	[M+H]+	C40H81N2O6P	2.25692e+07	1.52293e+07	1.79926e+07	1.18643e+07	2.01633e+07	1.65567e+07	1.68409e+07	1.57974e+07	1.9817e+07	1.86747e+07	1.95912e+07	9.35077e+06	1.34336e+07	2.42166e+07	2.56744e+07	2.81809e+07	2.1967e+07	2.06565e+07	1.44987e+07	1.56847e+07	1.76072e+07	1.91784e+07	1.23929e+07	1.9188e+07	2.52948e+07	1.83889e+07	1.84413e+07	1.68737e+07	1.68721e+07	1.99e+07	1.98365e+07	2.12657e+07	1.92246e+07	1.44676e+07	1.78333e+07	2.10645e+07	1.57093e+07	2.35167e+07	1.91316e+07	1.99752e+07	1.48562e+07	1.90632e+07	1.8838e+07
LIPID-P-0751	SP	SM	715.575	714.568	[M+H]+	C40H79N2O6P	2.55186e+06	1.53948e+06	2.34611e+06	1.39364e+06	1.76755e+06	2.072e+06	1.90003e+06	2.1344e+06	2.53457e+06	2.29958e+06	2.1945e+06	1.25545e+06	1.43946e+06	3.05918e+06	2.83602e+06	3.73483e+06	2.59623e+06	2.85225e+06	1.36683e+06	2.18968e+06	2.32324e+06	2.43403e+06	1.48004e+06	2.91659e+06	3.56182e+06	2.51473e+06	1.84634e+06	2.59489e+06	2.01582e+06	2.18178e+06	3.04386e+06	3.27249e+06	2.32082e+06	2.03969e+06	2.09428e+06	3.00315e+06	2.30898e+06	2.46057e+06	2.71975e+06	2.57086e+06	2.20664e+06	2.24066e+06	2.45937e+06
LIPID-P-0740	SP	SM	731.607	730.599	[M+H]+	C41H83N2O6P	2.32078e+06	1.58926e+06	2.08318e+06	1.86851e+06	2.75194e+06	2.08074e+06	2.32093e+06	2.26713e+06	2.27977e+06	2.60819e+06	2.48656e+06	1.26614e+06	2.13065e+06	2.81635e+06	2.57784e+06	3.53783e+06	2.64998e+06	2.73866e+06	2.48329e+06	2.59085e+06	2.1943e+06	1.98431e+06	1.61191e+06	2.13362e+06	2.77909e+06	2.36126e+06	2.18744e+06	2.17747e+06	2.43815e+06	2.68639e+06	2.18396e+06	2.09911e+06	1.90736e+06	1.78013e+06	1.97206e+06	2.80871e+06	1.78118e+06	2.99213e+06	2.42166e+06	2.55021e+06	2.13863e+06	2.4731e+06	2.31134e+06
LIPID-P-0752	SP	SM	729.591	728.583	[M+H]+	C41H81N2O6P	1.57732e+06	900916	1.38664e+06	1.09827e+06	1.41662e+06	1.27311e+06	1.51151e+06	1.44249e+06	1.42569e+06	1.6491e+06	1.85241e+06	890942	1.15943e+06	1.66035e+06	1.54948e+06	2.11342e+06	1.32991e+06	1.95299e+06	1.21031e+06	1.84387e+06	1.06897e+06	1.05042e+06	1.07053e+06	1.72079e+06	1.72498e+06	1.31109e+06	1.21906e+06	1.33096e+06	1.28687e+06	1.37558e+06	1.37995e+06	1.20661e+06	1.11745e+06	1.12895e+06	1.07433e+06	1.76684e+06	905399	1.6289e+06	1.30781e+06	1.65997e+06	1.30156e+06	1.36314e+06	1.06835e+06
LIPID-P-0741	SP	SM	745.622	744.615	[M+H]+	C42H85N2O6P	2.00761e+07	1.64258e+07	2.20028e+07	1.34687e+07	1.95531e+07	1.95703e+07	2.03889e+07	1.58427e+07	1.99911e+07	2.3354e+07	2.23983e+07	9.17943e+06	1.45941e+07	2.69718e+07	2.60914e+07	3.36042e+07	2.31685e+07	2.40496e+07	1.89142e+07	1.79821e+07	2.16428e+07	2.1143e+07	1.48495e+07	2.27665e+07	2.9678e+07	2.65682e+07	2.15075e+07	2.56635e+07	2.79422e+07	2.563e+07	2.29442e+07	2.33805e+07	2.09658e+07	2.18409e+07	2.22965e+07	2.83037e+07	1.98575e+07	2.82642e+07	2.58462e+07	2.94172e+07	1.7004e+07	2.0146e+07	1.98352e+07
LIPID-P-0742	SP	SM	759.638	758.63	[M+H]+	C43H87N2O6P	1.47686e+06	1.1592e+06	1.6074e+06	861825	1.37556e+06	1.31233e+06	1.64119e+06	1.35801e+06	979018	1.70187e+06	1.33352e+06	855801	1.02722e+06	1.60734e+06	1.48595e+06	1.78722e+06	1.66049e+06	1.66986e+06	1.21027e+06	1.46552e+06	1.37293e+06	1.26711e+06	958835	1.39977e+06	1.82637e+06	1.77678e+06	1.27767e+06	1.46257e+06	1.54711e+06	1.5685e+06	1.48911e+06	1.61037e+06	1.28092e+06	1.34002e+06	1.53554e+06	1.8564e+06	1.47356e+06	2.1175e+06	1.56083e+06	1.63019e+06	1.31747e+06	1.5366e+06	1.71462e+06
LIPID-P-0754	SP	SM	757.622	756.615	[M+H]+	C43H85N2O6P	6.45208e+07	3.07895e+07	5.27349e+07	4.66382e+07	5.18538e+07	5.34698e+07	5.972e+07	6.16405e+07	7.48315e+07	6.78538e+07	5.78433e+07	3.77665e+07	4.54372e+07	6.67606e+07	5.67372e+07	7.04998e+07	5.09318e+07	7.41775e+07	5.16684e+07	8.89117e+07	3.57398e+07	3.90447e+07	4.39195e+07	7.04415e+07	7.20812e+07	4.8171e+07	4.77492e+07	4.31067e+07	4.88628e+07	4.79272e+07	4.89093e+07	3.66824e+07	3.8985e+07	4.00047e+07	4.35827e+07	6.91625e+07	3.75352e+07	5.69444e+07	4.84097e+07	4.87844e+07	4.21513e+07	5.03036e+07	4.58621e+07
LIPID-P-0743	SP	SM	773.654	772.646	[M+H]+	C44H89N2O6P	1.4295e+07	1.05903e+07	1.64319e+07	5.02935e+06	1.06245e+07	1.09656e+07	1.47406e+07	1.00287e+07	8.18897e+06	1.29601e+07	9.1846e+06	5.20517e+06	9.17614e+06	1.3415e+07	1.48963e+07	1.59656e+07	1.71958e+07	1.36211e+07	9.95962e+06	1.07228e+07	1.26873e+07	1.72605e+07	7.87194e+06	1.03675e+07	1.5284e+07	1.65739e+07	1.3205e+07	1.82089e+07	1.81383e+07	1.65823e+07	1.30231e+07	2.11319e+07	1.54122e+07	1.28093e+07	1.75821e+07	1.54377e+07	2.10398e+07	1.96544e+07	1.9292e+07	1.66022e+07	1.25438e+07	1.52935e+07	1.73729e+07
LIPID-P-0755	SP	SM	771.638	770.63	[M+H]+	C44H87N2O6P	3.18017e+06	2.91698e+06	3.86862e+06	1.6823e+06	2.27294e+06	3.54961e+06	2.86495e+06	2.32237e+06	3.17895e+06	3.97473e+06	3.11786e+06	1.42738e+06	1.424e+06	4.40713e+06	3.20807e+06	6.61599e+06	3.77102e+06	3.62491e+06	2.6263e+06	3.50475e+06	3.67974e+06	4.24139e+06	1.50602e+06	3.68793e+06	4.8524e+06	4.28065e+06	3.5353e+06	4.78075e+06	5.30734e+06	3.58864e+06	3.55619e+06	4.97837e+06	3.88299e+06	2.99181e+06	4.01368e+06	5.08108e+06	3.6709e+06	4.33347e+06	5.56067e+06	4.08305e+06	3.23358e+06	3.19695e+06	3.29392e+06
LIPID-P-0744	SP	SM	787.669	786.661	[M+H]+	C45H91N2O6P	1.41604e+06	1.17894e+06	2.13249e+06	833637	1.52519e+06	1.92923e+06	1.87816e+06	1.33056e+06	1.0363e+06	2.09646e+06	1.35914e+06	1.07949e+06	990515	1.90388e+06	1.75294e+06	2.16246e+06	1.79519e+06	1.8491e+06	1.355e+06	1.40283e+06	1.56183e+06	1.60426e+06	1.09324e+06	1.2766e+06	1.66407e+06	1.85102e+06	1.24788e+06	1.68577e+06	1.76573e+06	1.79669e+06	1.52173e+06	1.66366e+06	1.51177e+06	1.40742e+06	1.53358e+06	1.80928e+06	1.41705e+06	1.85152e+06	1.71621e+06	1.60293e+06	1.44167e+06	1.69985e+06	1.577e+06
LIPID-P-0756	SP	SM	785.654	784.646	[M+H]+	C45H89N2O6P	9.74555e+07	3.88442e+07	7.56735e+07	4.95372e+07	6.16781e+07	1.04058e+08	9.23712e+07	8.02133e+07	8.19729e+07	1.11053e+08	7.75991e+07	5.11585e+07	5.08285e+07	9.9911e+07	9.05556e+07	1.10629e+08	8.12068e+07	1.22975e+08	7.01172e+07	1.10655e+08	6.14527e+07	7.22452e+07	7.01727e+07	1.0871e+08	1.05314e+08	7.94792e+07	6.74769e+07	6.5868e+07	8.61794e+07	7.92196e+07	6.82825e+07	6.63825e+07	6.54142e+07	6.33976e+07	6.25579e+07	1.0254e+08	6.35374e+07	7.99352e+07	7.64727e+07	7.92373e+07	6.27124e+07	7.06936e+07	6.25598e+07
LIPID-P-0745	SP	SM	801.685	800.677	[M+H]+	C46H93N2O6P	2.66175e+07	2.58736e+07	4.10978e+07	1.34735e+07	2.39599e+07	3.29929e+07	3.19132e+07	1.92469e+07	1.95948e+07	3.83778e+07	2.14083e+07	1.51487e+07	1.69477e+07	2.8397e+07	3.16423e+07	3.97163e+07	3.72625e+07	2.82578e+07	2.4597e+07	2.54029e+07	2.9027e+07	4.37566e+07	1.57081e+07	2.06698e+07	3.09899e+07	3.51098e+07	2.87801e+07	3.79499e+07	3.92915e+07	3.59022e+07	2.6099e+07	3.94033e+07	3.96571e+07	2.89257e+07	3.74507e+07	3.43767e+07	3.79987e+07	3.64675e+07	4.20778e+07	3.366e+07	2.70646e+07	3.43844e+07	2.80594e+07
LIPID-P-0757	SP	SM	799.669	798.661	[M+H]+	C46H91N2O6P	1.01837e+07	7.38365e+06	1.1287e+07	4.41106e+06	6.32162e+06	1.23571e+07	1.06769e+07	6.30563e+06	8.3504e+06	1.52982e+07	7.2409e+06	4.56189e+06	4.71507e+06	9.21048e+06	9.35e+06	1.56609e+07	1.09628e+07	9.89601e+06	9.30149e+06	1.13658e+07	6.50142e+06	1.33129e+07	5.07427e+06	9.3447e+06	1.11636e+07	9.83762e+06	1.02125e+07	9.33657e+06	1.47005e+07	1.0226e+07	7.1517e+06	1.25482e+07	1.23561e+07	9.63624e+06	9.72797e+06	1.10818e+07	1.20215e+07	1.10858e+07	1.34735e+07	1.01207e+07	7.91495e+06	8.94171e+06	7.75895e+06
LIPID-P-0746	SP	SM	815.701	814.693	[M+H]+	C47H95N2O6P	1.65965e+06	929052	1.93721e+06	949675	1.58568e+06	2.24063e+06	1.90757e+06	1.61162e+06	1.46359e+06	2.04072e+06	1.60175e+06	1.22573e+06	975440	2.06828e+06	1.7448e+06	2.12574e+06	1.67848e+06	2.17109e+06	1.56883e+06	1.72077e+06	1.63933e+06	1.87025e+06	1.3139e+06	1.79665e+06	1.85109e+06	1.79607e+06	1.22568e+06	1.52286e+06	1.71888e+06	2.07066e+06	1.51881e+06	1.67111e+06	2.26667e+06	1.52851e+06	1.75575e+06	1.92887e+06	1.61137e+06	1.67883e+06	1.86642e+06	1.82592e+06	1.40533e+06	1.85705e+06	1.45881e+06
LIPID-P-0758	SP	SM	813.685	812.677	[M+H]+	C47H93N2O6P	2.55202e+06	2.28167e+06	4.46899e+06	2.2176e+06	2.64193e+06	3.52416e+06	3.55624e+06	2.13279e+06	2.70533e+06	3.76532e+06	3.2481e+06	1.80187e+06	2.47324e+06	3.56945e+06	3.14444e+06	4.26192e+06	3.43149e+06	2.83141e+06	2.77874e+06	2.16055e+06	3.34723e+06	3.24338e+06	2.10987e+06	2.78734e+06	4.87682e+06	3.3074e+06	2.25393e+06	3.39673e+06	3.54189e+06	3.6934e+06	3.04509e+06	3.18994e+06	3.04014e+06	2.99876e+06	3.21903e+06	4.11895e+06	2.68426e+06	5.48711e+06	3.89787e+06	3.93916e+06	2.40679e+06	3.21484e+06	3.07398e+06
LIPID-P-0747	SP	SM	829.716	828.708	[M+H]+	C48H97N2O6P	3.71405e+06	2.30168e+06	2.87468e+06	1.5865e+06	2.28514e+06	2.63887e+06	2.20408e+06	3.3972e+06	2.90441e+06	3.04316e+06	3.31734e+06	1.59434e+06	2.51258e+06	3.77333e+06	4.19992e+06	3.45209e+06	3.77546e+06	4.8832e+06	1.78799e+06	2.64715e+06	2.94485e+06	4.98335e+06	2.00319e+06	4.32814e+06	3.36095e+06	3.24512e+06	2.79404e+06	3.5375e+06	3.63908e+06	3.13252e+06	3.92376e+06	3.71244e+06	3.43999e+06	2.31804e+06	3.53016e+06	2.81154e+06	5.33766e+06	2.90799e+06	3.33293e+06	3.29514e+06	2.56416e+06	3.0848e+06	4.13545e+06
LIPID-P-0759	SP	SM	827.701	826.693	[M+H]+	C48H95N2O6P	2.69094e+06	1.223e+06	1.61153e+06	1.62321e+06	1.43786e+06	1.09754e+06	946072	2.579e+06	3.11859e+06	2.02653e+06	3.19877e+06	1.05463e+06	2.01252e+06	2.86223e+06	3.30341e+06	1.94513e+06	2.78789e+06	3.69768e+06	657832	1.56582e+06	2.17473e+06	3.04068e+06	1.50988e+06	3.89564e+06	3.95943e+06	1.82024e+06	2.85471e+06	3.40289e+06	1.78862e+06	1.7618e+06	5.50655e+06	3.04637e+06	1.72787e+06	1.56042e+06	3.04503e+06	2.17174e+06	2.87553e+06	3.18707e+06	2.44622e+06	2.29175e+06	2.50258e+06	2.24435e+06	5.45267e+06
LIPID-P-1568	SP	SM	843.7	842.724	[M+H]+	C49H99N2O6P	1.34475e+06	1.02822e+06	1.07384e+06	726059	1.10135e+06	1.20263e+06	1.41873e+06	1.18437e+06	1.63029e+06	1.10367e+06	969785	1.02699e+06	575282	1.45054e+06	1.29829e+06	1.33213e+06	942022	1.23913e+06	809997	1.05547e+06	917177	1.14424e+06	727726	1.1348e+06	1.03502e+06	1.13819e+06	670722	904406	1.03779e+06	1.20875e+06	823920	984046	1.21324e+06	849158	1.10606e+06	1.09426e+06	1.14197e+06	883022	1.03797e+06	1.1248e+06	1.02266e+06	1.02465e+06	893323
LIPID-P-0760	SP	SM	841.716	840.708	[M+H]+	C49H97N2O6P	2.42921e+06	2.18813e+06	3.06979e+06	2.25075e+06	2.17253e+06	2.91033e+06	2.78948e+06	1.91036e+06	2.9494e+06	2.54629e+06	2.76278e+06	1.70636e+06	1.94412e+06	3.11384e+06	2.33095e+06	2.5979e+06	2.45183e+06	1.7199e+06	1.80167e+06	1.68299e+06	2.9455e+06	3.22947e+06	1.62533e+06	2.59139e+06	3.01255e+06	2.36914e+06	1.56172e+06	2.87246e+06	2.14122e+06	2.8383e+06	2.43356e+06	2.18081e+06	2.227e+06	1.96109e+06	2.94793e+06	2.71824e+06	2.34761e+06	3.57278e+06	2.45816e+06	2.60311e+06	2.16106e+06	2.14605e+06	2.29114e+06
LIPID-P-0749	SP	SM	673.528	672.521	[M+H]+	C37H73N2O6P	6.22489e+06	3.32673e+06	4.83158e+06	3.49727e+06	3.84054e+06	4.60772e+06	5.95555e+06	4.86041e+06	4.95742e+06	5.69427e+06	3.32676e+06	2.47838e+06	2.72163e+06	5.17346e+06	3.66448e+06	5.17505e+06	5.29854e+06	4.94504e+06	2.71596e+06	4.20483e+06	3.98093e+06	3.84373e+06	3.02247e+06	4.65344e+06	5.47681e+06	5.4572e+06	3.63102e+06	7.4488e+06	5.40293e+06	4.48622e+06	8.987e+06	8.12725e+06	3.70163e+06	4.89442e+06	4.66869e+06	7.53685e+06	4.99693e+06	5.01729e+06	6.9095e+06	7.19912e+06	3.90291e+06	5.41128e+06	4.50017e+06
LIPID-P-0761	SP	SM	727.575	726.568	[M+H]+	C41H79N2O6P	3.47983e+06	2.68665e+06	5.66645e+06	2.4742e+06	2.22869e+06	4.71935e+06	3.88473e+06	2.57469e+06	2.8217e+06	3.95103e+06	4.19025e+06	2.21961e+06	2.3616e+06	6.06144e+06	3.39997e+06	5.99558e+06	3.99929e+06	3.73992e+06	2.4765e+06	2.04892e+06	6.41516e+06	5.28562e+06	1.74645e+06	3.65751e+06	5.52994e+06	4.99738e+06	3.23942e+06	6.4462e+06	5.77528e+06	3.1773e+06	4.78367e+06	6.43093e+06	4.55478e+06	3.6915e+06	4.39829e+06	6.30135e+06	3.41409e+06	4.97381e+06	5.39234e+06	4.43143e+06	4.26699e+06	3.82043e+06	4.79712e+06
LIPID-P-0762	SP	SM	755.607	754.599	[M+H]+	C43H83N2O6P	2.07533e+06	1.50259e+06	2.27257e+06	2.04967e+06	1.79373e+06	1.7168e+06	1.74004e+06	1.84499e+06	744624	2.10047e+06	2.29639e+06	1.11097e+06	1.41264e+06	3.05984e+06	1.90706e+06	2.81451e+06	2.53179e+06	1.83382e+06	1.30789e+06	1.77465e+06	3.34118e+06	2.27978e+06	1.0375e+06	2.42434e+06	2.94477e+06	2.27958e+06	1.80848e+06	3.84587e+06	2.32419e+06	1.65082e+06	2.9668e+06	2.97098e+06	2.44013e+06	1.93916e+06	2.08118e+06	2.34961e+06	1.7833e+06	2.0924e+06	2.62661e+06	2.17869e+06	2.07008e+06	2.07094e+06	2.29672e+06
LIPID-P-0763	SP	SM	783.638	782.63	[M+H]+	C45H87N2O6P	1.12202e+07	1.00376e+07	1.32849e+07	7.80689e+06	9.02734e+06	1.05888e+07	8.9564e+06	9.83779e+06	1.20147e+07	1.15205e+07	1.24841e+07	6.54502e+06	7.39558e+06	1.7632e+07	1.0849e+07	1.91793e+07	1.47971e+07	11310222	7.96783e+06	1.13224e+07	1.49071e+07	1.11659e+07	6.02263e+06	1.23519e+07	1.58736e+07	1.37805e+07	8.26937e+06	1.58391e+07	1.49896e+07	1.20903e+07	1.34491e+07	1.68487e+07	1.32721e+07	1.08237e+07	1.07856e+07	1.48953e+07	1.23857e+07	1.08285e+07	1.52192e+07	1.49656e+07	9.71332e+06	1.2662e+07	1.33813e+07
LIPID-P-0764	SP	SM	797.654	796.646	[M+H]+	C46H89N2O6P	9.16176e+06	8.40427e+06	8.5854e+06	1.00494e+07	1.38653e+07	1.10484e+07	1.15888e+07	1.41027e+07	1.5708e+07	2.59006e+07	1.30125e+07	1.1625e+07	9.74526e+06	1.68748e+07	1.82281e+07	1.53068e+07	1.72955e+07	1.4934e+07	1.32546e+07	2.02157e+07	1.20019e+07	1.31029e+07	1.20549e+07	1.51888e+07	2.29544e+07	1.52038e+07	1.27056e+07	1.29437e+07	1.64442e+07	1.6209e+07	1.31922e+07	1.07663e+07	1.04525e+07	1.08442e+07	1.23967e+07	2.06225e+07	1.18564e+07	1.99948e+07	1.68089e+07	1.26455e+07	1.02635e+07	1.44548e+07	1.32687e+07
LIPID-P-0765	SP	SM	811.669	810.661	[M+H]+	C47H91N2O6P	2.00739e+06	1.33116e+06	2.27385e+06	1.5056e+06	1.7602e+06	2.13462e+06	1.99609e+06	1.62643e+06	2.1016e+06	2.196e+06	2.09527e+06	1.20956e+06	1.50209e+06	2.51873e+06	2.11003e+06	3.27559e+06	2.19797e+06	2.17085e+06	1.80506e+06	2.20583e+06	2.01866e+06	2.14475e+06	1.47456e+06	2.59954e+06	2.86764e+06	2.34001e+06	1.74974e+06	2.11167e+06	2.32535e+06	2.45234e+06	2.07107e+06	2.20595e+06	1.80895e+06	1.93108e+06	1.79078e+06	2.69495e+06	2.02978e+06	2.56372e+06	2.45649e+06	2.80652e+06	1.79478e+06	2.14983e+06	1.99885e+06
LIPID-P-0768	SP	SM	807.638	806.63	[M+H]+	C47H87N2O6P	4.1319e+06	9.2331e+06	7.98016e+06	7.43508e+06	6.31746e+06	1.61541e+07	6.28687e+06	5.24657e+06	9.93105e+06	7.3469e+06	8.65864e+06	7.38937e+06	6.6357e+06	1.08711e+07	6.54407e+06	1.17211e+07	1.04526e+07	5.84741e+06	3.8846e+06	4.42713e+06	2.10866e+07	1.87877e+07	3.94073e+06	4.89248e+06	9.30675e+06	1.88982e+07	1.0158e+07	1.61285e+07	1.60992e+07	1.05877e+07	1.53748e+07	1.59494e+07	1.01987e+07	1.28853e+07	1.25868e+07	1.87563e+07	1.09285e+07	1.13966e+07	1.55534e+07	1.14897e+07	1.31052e+07	1.1083e+07	1.50115e+07
LIPID-P-0766	SP	SM	825.685	824.677	[M+H]+	C48H93N2O6P	842084	814270	1.09052e+06	865509	1.28789e+06	996289	1.10028e+06	1.21554e+06	1.22825e+06	2.49463e+06	1.21992e+06	808251	1.17034e+06	1.57901e+06	1.56933e+06	1.20238e+06	1.81982e+06	1.42144e+06	1.31064e+06	2.19689e+06	1.01542e+06	1.25595e+06	1.1469e+06	1.42387e+06	1.53474e+06	1.47391e+06	1.2414e+06	1.35432e+06	1.54309e+06	1.61832e+06	1.38925e+06	889998	1.06908e+06	1.10204e+06	1.19776e+06	1.78696e+06	1.27868e+06	1.91147e+06	1.38219e+06	1.20504e+06	910602	1.53159e+06	1.35534e+06
LIPID-P-0767	SP	SM	839.701	838.693	[M+H]+	C49H95N2O6P	3.4564e+06	2.7138e+06	4.09966e+06	2.65784e+06	2.85209e+06	3.18093e+06	3.1435e+06	2.84845e+06	3.82625e+06	3.31936e+06	3.62783e+06	1.91719e+06	1.88255e+06	4.8011e+06	3.62769e+06	6.48601e+06	3.37734e+06	3.07975e+06	2.30943e+06	3.4227e+06	4.00362e+06	3.79076e+06	1.83739e+06	4.38e+06	5.03325e+06	4.08083e+06	2.25211e+06	4.19138e+06	3.53413e+06	3.46475e+06	3.51977e+06	4.07823e+06	3.31941e+06	2.85815e+06	2.77595e+06	4.38107e+06	3.25574e+06	3.62397e+06	3.88698e+06	4.98095e+06	2.8033e+06	3.66765e+06	3.40452e+06
LIPID-P-0748	SP	SM	843.732	842.724	[M+H]+	C49H99N2O6P	1.63219e+06	1.22672e+06	1.37155e+06	882324	1.12321e+06	1.38073e+06	1.45359e+06	1.53542e+06	1.93492e+06	1.32024e+06	1.49365e+06	1.04584e+06	721140	1.54492e+06	1.45627e+06	1.58529e+06	1.1251e+06	1.45441e+06	909752	1.33002e+06	1.14525e+06	1.19907e+06	917688	1.27926e+06	1.11695e+06	1.47822e+06	858378	950276	1.20642e+06	1.40251e+06	950997	1.18214e+06	1.42434e+06	1.13793e+06	1.26693e+06	1.22262e+06	1.33467e+06	1.01304e+06	1.14113e+06	1.18033e+06	1.18717e+06	1.15055e+06	939263
LIPID-P-0094	SP	SPH	302.306	301.298	[M+H]+	C18H39NO2	41251.4	98706.3	96266.9	73184.1	427959	116232	157377	202550	112479	149973	178093	90118.5	61415.8	69729.2	70235.1	188393	81791.7	106755	106543	210808	65180.2	149362	63946.4	92318.5	113714	47824.6	43780.2	179049	151776	112232	117515	108526	38742.2	49377.7	149297	52853.2	47879.8	88557.4	63417.3	64118.9	60254.2	178920	74753.3
LIPID-P-0096	SP	SPH	300.29	299.282	[M+H]+	C18H37NO2	288158	346779	592310	677447	3.48988e+06	906256	1.4894e+06	2.37618e+06	1.10823e+06	1.71597e+06	1.16093e+06	734952	566809	651277	567855	2.43223e+06	738741	1.00464e+06	1.1718e+06	1.37409e+06	554378	1.26868e+06	749986	876192	1.3403e+06	298349	305511	1.72804e+06	2.07424e+06	927891	1.14569e+06	935733	280776	313777	1.21413e+06	458364	330703	760567	470195	641008	368184	1.71327e+06	640311
LIPID-P-0097	SP	SPH	298.275	297.267	[M+H]+	C18H35NO2	134912	123580	127257	185546	489612	182508	333096	474446	320438	388542	255106	185775	132402	184895	207456	464790	142973	241902	250981	490792	138525	269193	171648	291115	364137	96711.5	141574	499951	550328	338469	383516	291182	80777.5	93877.8	280559	157851	127543	167259	167473	177194	146713	421489	157422
LIPID-P-2271	GL	TG	600.52	582.486	[M+NH4]+	C35H66O6	71863.8	677268	53894.7	5283.89	24000.8	42589	150564	44426.9	5132.72	57817.9	89488.1	168022	43804.2	179734	8434.6	342217	396418	16923.1	51965.8	3116.15	245992	572120	21342.3	24609.7	29834	470692	20883.4	975329	760066	1.29818e+06	52021.8	1.9083e+06	514779	28650.4	1.15677e+06	215376	1.45958e+06	456650	670129	405606	66389.5	803583	27229
LIPID-P-2272	GL	TG	628.55	610.517	[M+NH4]+	C37H70O6	151054	2.40235e+06	230680	7059.28	96539.7	7489.43	361427	360151	3465.26	7293.14	10462	7061.81	28943.9	16621.7	8393.17	17665.3	555226	51356.6	103046	5817.6	48889.2	50984.1	84222.4	4696.04	6090.07	1.16993e+06	66475.5	2.4041e+06	1.15157e+06	3.90135e+06	235362	3.63355e+06	1.30056e+06	85655.5	2.31775e+06	409446	2.81914e+06	1.08521e+06	1.57623e+06	864279	163528	1.93189e+06	154804
LIPID-P-0769	GL	TG	656.578	638.549	[M+NH4]+	C39H74O6	129210	1.64775e+06	152785	5487.79	84761.6	94991.9	503460	233627	9371.04	21771.9	54895.8	119253	1.12809e+06	172224	239011	274780	856998	42655.7	139729	9232.56	3.23245e+06	2.28051e+06	55964.2	64386.5	45952.4	1.01693e+06	113545	1.86156e+06	1.43026e+06	2.53076e+06	165108	3.68402e+06	1.24639e+06	53595.3	1.75795e+06	596920	2.40173e+06	923578	1.29511e+06	863181	286035	1.48998e+06	105928
LIPID-P-0821	GL	TG	710.629	692.595	[M+NH4]+	C43H80O6	423192	2.78866e+06	370462	6730.84	394759	13934.4	1.48574e+06	746031	3157.1	4034.53	8069.38	38454.4	826797	33162.4	158450	27731.3	1.82098e+06	243946	413718	2709.06	1.46104e+06	700933	204463	18876.6	7164.94	2.89776e+06	307334	3.3019e+06	3.90844e+06	7.04166e+06	335735	8.72044e+06	2.90049e+06	254292	3.13248e+06	1.21105e+06	5.36838e+06	2.15089e+06	3.00371e+06	2.38051e+06	487340	3.68117e+06	454815
LIPID-P-0877	GL	TG	708.614	690.58	[M+NH4]+	C43H78O6	150379	1.56237e+06	165767	158.984	91836	2329.49	545747	239052	1582.49	1059.67	2188.55	7513.96	287374	9419.86	30512.3	11036.1	963908	89028.8	157487	794.92	1.19588e+06	743073	43697.5	6133.72	158.984	1.68642e+06	47085	1.56921e+06	1.25651e+06	3.32534e+06	133770	6.73818e+06	1.57621e+06	81338.6	2.33693e+06	489506	2.18076e+06	865819	1.3804e+06	1.02444e+06	264284	1.31434e+06	141275
LIPID-P-0818	GL	TG	682.599	664.564	[M+NH4]+	C41H76O6	234833	2.06441e+06	221759	3194.31	62779.5	408099	1.31285e+06	56675.8	3595.16	34418	209483	463421	4.525e+06	888881	1.08296e+06	753703	1.87288e+06	36152.3	460268	2923.65	1.29304e+07	8.99518e+06	26169.8	106661	152708	2.46492e+06	84089.9	2.47763e+06	1.90351e+06	2.71404e+06	66864	7.40309e+06	2.20242e+06	13869.8	2.57235e+06	821227	2.88634e+06	796782	1.97807e+06	803426	264430	1.67998e+06	36956.3
LIPID-P-0773	GL	TG	712.643	694.611	[M+NH4]+	C43H82O6	300050	1.87098e+06	406616	10713.4	292176	44630.7	415105	1.32221e+06	11409.8	13673.2	3688.56	28903	152974	26715.9	46516.3	20222.9	426195	129699	97623.5	4110.84	340147	281204	230825	44629.3	22176.1	671375	266703	1.43623e+06	1.32538e+06	2.89049e+06	444828	1.69056e+06	1.28551e+06	150137	1.7354e+06	644829	1.97593e+06	1.00153e+06	1.1079e+06	711552	1.1178e+06	1.10554e+06	399119
LIPID-P-0953	GL	TG	734.629	716.595	[M+NH4]+	C45H80O6	18265.5	88709.2	18045.4	166.83	34340.4	2049.92	42635.9	26165.1	166.83	1228.67	1235.19	2497.74	45374.5	5532.25	6966.44	166.83	82994.1	15927.9	16059.3	1238.94	139574	87221.2	8931.54	3305.36	2040.74	134288	11453.3	150216	94848.3	174885	45721.1	440693	94276.8	16387.1	130221	48427.8	173549	81134.5	74834.1	52910.6	82727.7	75451	11876.5
LIPID-P-0771	GL	TG	684.613	666.58	[M+NH4]+	C41H78O6	523030	2.88327e+06	896987	53275.9	484235	38051.1	633987	2.63027e+06	42082.9	25878.3	38330.1	41975.4	176815	32760.1	32861.7	41533.9	828937	281891	178588	18871.7	328929	226604	1.16687e+06	74942.9	20102.7	1.31541e+06	390462	3.44461e+06	3.21762e+06	8.4121e+06	1.14647e+06	6.46878e+06	2.23608e+06	449299	4.11597e+06	1.23819e+06	3.96482e+06	2.7753e+06	2.77588e+06	2.25213e+06	1.01418e+06	3.09502e+06	865065
LIPID-P-0824	GL	TG	738.661	720.627	[M+NH4]+	C45H84O6	245585	1.42287e+06	244696	6848.09	179984	165007	642073	222957	1398.68	48347.5	49422.4	391416	664162	220413	134504	285849	772910	84469.7	199983	2688.03	2.38938e+06	1.03823e+06	96025.6	80437.9	123071	1.45727e+06	212390	1.52279e+06	1.54907e+06	1.77802e+06	158526	3.74513e+06	1.57064e+06	53766.6	2.08819e+06	624287	2.30706e+06	723655	1.08646e+06	582223	417953	1.11399e+06	182887
LIPID-P-0828	GL	TG	766.692	748.658	[M+NH4]+	C47H88O6	948270	3.06945e+06	898169	8431.29	266895	705826	1.50137e+06	462434	1461.87	127839	331767	1.14036e+06	2.9789e+06	1.31485e+06	1.08192e+06	974590	1.68287e+06	192241	494038	17325.7	9.27559e+06	5.26268e+06	251135	354372	605733	3.40973e+06	398306	4.26263e+06	4.43453e+06	3.41916e+06	314319	5.51304e+06	3.25213e+06	263738	9.98256e+06	1.34997e+06	3.16405e+06	1.39375e+06	3.09942e+06	1.8562e+06	1.45038e+06	2.33723e+06	938419
LIPID-P-0888	GL	TG	764.672	746.642	[M+NH4]+	C47H86O6	1.06136e+06	6.15849e+06	1.97462e+06	16838.4	1.05283e+06	253327	2.00825e+06	3.23391e+06	3474.86	29360.8	197610	216987	3.85262e+06	816915	899319	1123711	2.33322e+06	553735	605352	5771.21	6.5452e+06	5.74012e+06	784596	260554	207407	4.0971e+06	603593	5.31027e+06	4.57936e+06	9.24931e+06	1.70236e+06	1.43253e+07	5.84335e+06	783327	1.03927e+07	1.96444e+06	8.47005e+06	2.91276e+06	5.10329e+06	3.14774e+06	3.13797e+06	3.30652e+06	2.72895e+06
LIPID-P-0957	GL	TG	762.659	744.627	[M+NH4]+	C47H84O6	53315.2	244836	112468	4115.35	20220.6	44247.4	96568.3	24404.8	275.161	2240.3	30212.3	37118.9	336322	82680.2	141361	94284.7	133309	29873.9	36150	4544.07	1.13645e+06	711033	23380	13550.8	24896.7	283719	34790	287812	277142	284850	37029	632196	257494	24407.3	264316	107096	245269	102860	193864	113356	205688	208517	122265
LIPID-P-1026	GL	TG	760.639	742.611	[M+NH4]+	C47H82O6	100154	752539	131637	1247.23	37761.8	178706	495843	24940.4	1209.62	57191.5	218744	220380	2.15355e+06	790152	382614	1.40933e+06	869936	32509.7	272274	2804.15	4.91736e+06	5.23038e+06	13189.2	143923	131850	1.99794e+06	56982.4	1.01986e+06	1.21949e+06	895528	33880.1	4.8839e+06	957032	17319.5	1.1563e+06	318679	1.09804e+06	611170	1.0655e+06	380178	333249	624941	69586.4
LIPID-P-0962	GL	TG	790.69	772.658	[M+NH4]+	C49H88O6	824305	5.17911e+06	1.2722e+06	17676.7	536495	495415	2.62791e+06	685863	9266.16	77528.6	263311	548731	8.12814e+06	1.51443e+06	2.7874e+06	1.68718e+06	3.25807e+06	400326	1.22947e+06	10992	2.51692e+07	1.86781e+07	211481	200528	192276	7.85413e+06	377538	3.6157e+06	5.62806e+06	5.37949e+06	476183	2.0942e+07	5.24428e+06	435926	4.15255e+06	2.3223e+06	8.77993e+06	2.20094e+06	4.20453e+06	2.09039e+06	1.95021e+06	3.3048e+06	2.00478e+06
LIPID-P-1028	GL	TG	788.673	770.642	[M+NH4]+	C49H86O6	83137.4	408354	209598	2724.05	84943.6	57381.5	335277	54612.4	2734.09	11291.5	46634.7	46013.4	1.03141e+06	162040	311603	201233	579974	47819.4	88110.2	1355.71	3.46594e+06	3.04822e+06	29829.1	24308.4	39829.5	921197	95780.3	422859	603478	575261	88933	2.94409e+06	596474	69595.3	485619	188616	689101	287934	481262	229945	371745	294716	277518
LIPID-P-0778	GL	TG	740.677	722.642	[M+NH4]+	C45H86O6	67175.4	212534	47331.5	4836.54	59341.4	16593.8	136050	295456	972.057	5841.29	16784.7	8247.09	75614.2	18390.2	31630.9	32063.1	108097	32551.3	36593.8	194.411	181643	55700.6	57809.3	11798.4	2527.55	192385	50286.7	237701	305255	309031	69402.3	337777	245884	31289.1	273353	140011	335006	105003	223316	163959	48954.5	140085	103494
LIPID-P-0777	GL	TG	740.677	722.642	[M+NH4]+	C45H86O6	753375	2.56965e+06	1.25263e+06	20130.1	629918	225372	812235	2.20288e+06	32158.3	96033.6	129956	278316	1.184e+06	298861	545629	352492	805222	356434	257637	33303.8	2.08294e+06	1.25626e+06	696482	177355	126029	1.57596e+06	481198	3.1578e+06	2.93725e+06	3.86323e+06	738906	2.7426e+06	2.41619e+06	722563	2.25278e+06	1.23766e+06	4.36599e+06	1.53023e+06	2.02092e+06	1.70232e+06	1.48031e+06	2.0407e+06	1.03495e+06
LIPID-P-0823	GL	TG	738.66	720.627	[M+NH4]+	C45H84O6	327285	1.5513e+06	344789	7375.16	277286	66482.5	736578	330418	11517.7	18734.1	32084.4	67585.2	643568	109712	141408	60448.6	988091	129946	281441	7953.56	1.7926e+06	1.12123e+06	129259	32696.6	26969.7	1.33515e+06	299071	1.71089e+06	1.60225e+06	2.29213e+06	249906	5.02682e+06	1.76262e+06	122778	2.10503e+06	649372	3.44253e+06	895658	1.49478e+06	593296	614789	1.54965e+06	241420
LIPID-P-0783	GL	TG	768.706	750.674	[M+NH4]+	C47H90O6	137153	252638	91578.2	4501.5	107374	37118.9	157780	453859	7414.43	13685.9	16472.2	40139.3	158144	35514.3	68060.9	42770.6	124371	47694.6	73289.9	11600.1	183749	147673	148892	27608.3	13908.2	255309	110963	172006	263611	170397	78813.5	348396	294846	48611.4	331045	131318	347469	131489	185751	116025	120246	148392	103830
LIPID-P-0829	GL	TG	766.692	748.658	[M+NH4]+	C47H88O6	1.22715e+06	5.95357e+06	2.83312e+06	111123	1.4157e+06	519824	1.66898e+06	9.95294e+06	64735.4	71116.2	77093.8	196535	210960	113799	71607.8	54705.2	1.70606e+06	878682	559114	42975	297906	244031	2.14195e+06	163884	62819.4	3.00761e+06	1.19203e+06	7.45185e+06	7.38769e+06	1.09721e+07	3.31266e+06	9.2701e+06	6.04866e+06	1.70821e+06	8.94518e+06	2.7073e+06	9.23171e+06	4.11312e+06	5.08718e+06	3.40529e+06	3.0973e+06	6.62756e+06	4.0096e+06
LIPID-P-0886	GL	TG	764.676	746.642	[M+NH4]+	C47H86O6	578302	4.16879e+06	1.88117e+06	28059.8	779956	60901.1	1.0166e+06	3.94722e+06	15130.4	12033.9	18223.8	44280.6	98637.6	26665.2	14054.1	19980.3	922437	430225	320563	8437.49	168145	142413	780374	45892.1	5000.38	1.89422e+06	432254	2.97846e+06	3.11469e+06	5.76208e+06	1.35916e+06	7.60437e+06	3.32417e+06	697575	4.75673e+06	1.13212e+06	5.1089e+06	2.6033e+06	2.98157e+06	1.58802e+06	2.16142e+06	2.22859e+06	2.37275e+06
LIPID-P-0831	GL	TG	780.703	762.674	[M+NH4]+	C48H90O6	52170.5	175772	95975.7	8714.76	134754	38752.8	53086	183010	12612.6	3884.85	10552	12292.3	66621.3	23764.4	27685.9	23610.2	71451.3	133829	29870.7	13322.8	98054.5	90054.3	36800.9	13662.6	8306.55	127991	183123	167901	145536	156892	270939	185612	179310	27025.1	90785.7	53310.1	133890	135868	83188.1	82928.2	417901	106219	107957
LIPID-P-0891	GL	TG	778.693	760.658	[M+NH4]+	C48H88O6	13843.6	54352.8	42049.2	1520.05	52027.8	1451.84	22791.6	70353.8	11879.8	5365.78	2024.71	8900.93	11402.9	2978.46	4473.4	4535.2	20960.6	29176.7	8043.03	290.368	10500.5	18395.8	19870	3007.34	4470.6	53052.8	43448.6	46955.9	79878.8	47922	106433	124848	62628.9	10989.5	55413.1	12466.8	100884	24837.7	55160.6	20811.9	128505	47176	63440.4
LIPID-P-0784	GL	TG	768.707	750.674	[M+NH4]+	C47H90O6	580187	1.68549e+06	2.2379e+06	80201.5	613106	41227.9	442031	2.00378e+06	19704.1	43926.6	29922.1	73160.1	108503	45699.9	49641	41331.6	431300	329799	252519	69722.9	127631	93284.8	1.61343e+06	151193	28995.2	425115	530218	1.63175e+06	1.68527e+06	1.65295e+06	597178	945027	1.75053e+06	1.13081e+06	1.71197e+06	1.01865e+06	2.24767e+06	1.01955e+06	1.59603e+06	716688	2.12984e+06	1.8458e+06	2.8776e+06
LIPID-P-0827	GL	TG	766.692	748.658	[M+NH4]+	C47H88O6	260827	512958	297874	65191	185835	327054	284439	652030	66102.4	63162	135186	198510	134566	135310	62594.9	149975	263261	170282	113307	57544.2	273356	146170	221335	77523.1	95027	345412	226498	968178	1.03875e+06	529875	304464	581334	335681	109488	577676	256770	318312	200003	286683	297825	452665	370836	404583
LIPID-P-0833	GL	TG	794.724	776.689	[M+NH4]+	C49H92O6	5.83661e+06	1.34571e+07	1.31008e+07	333571	5.88372e+06	594956	4.08952e+06	1.22867e+07	74568.8	170027	277596	636428	2.12148e+06	680659	555768	580338	4.79903e+06	3.39922e+06	2.3785e+06	225777	2.65941e+06	3.76302e+06	7.79201e+06	1.14974e+06	245089	6.19653e+06	3.3332e+06	1.48943e+07	1.70276e+07	1.35629e+07	4.55843e+06	1.17681e+07	1.21468e+07	8.39975e+06	1.53577e+07	9.76945e+06	1.82977e+07	1.14068e+07	9.66064e+06	6.73489e+06	9.78311e+06	1.59725e+07	1.38488e+07
LIPID-P-0893	GL	TG	792.707	774.674	[M+NH4]+	C49H90O6	2.59172e+06	1.06293e+07	6.88731e+06	64853.2	2.3972e+06	243908	2.6445e+06	9.06216e+06	16044.5	14593.8	237135	180074	1.14494e+06	428780	308478	345539	1.9822e+06	1.64044e+06	944300	29363.2	3.53071e+06	2.49965e+06	2.48165e+06	400871	137917	5.73805e+06	1.94319e+06	1.02931e+07	1.00178e+07	1.16667e+07	3.88215e+06	1.36109e+07	1.03883e+07	2.68111e+06	1.26668e+07	3.8747e+06	1.14467e+07	5.63879e+06	7.54991e+06	4.51017e+06	8.59947e+06	5.69237e+06	1.329e+07
LIPID-P-2273	GL	TG	790.69	772.658	[M+NH4]+	C49H88O6	229527	1.317e+06	1.02853e+06	10769.2	318515	34713	230950	957587	2567.63	1468.39	7945.63	24722	112781	52755.4	26527.3	56868.6	431253	146616	86939.4	2464.28	491501	426633	346757	56757.3	16321.5	822475	297479	1.15342e+06	1.6757e+06	2.12025e+06	514529	1.78297e+06	1.45361e+06	469811	1.24671e+06	701835	1.24654e+06	516813	865854	650972	1.40943e+06	639157	1.70699e+06
LIPID-P-1089	GL	TG	842.726	824.689	[M+NH4]+	C53H92O6	76335.2	390538	194855	9341.2	11022.4	473261	43562.1	28334.3	14302.3	14051.1	24052.4	115745	14916.3	87426.5	9000	138884	51187.3	19981.1	9976.31	21546.5	160532	138848	30694.6	30878.5	51836.4	80514.3	39835.4	89219	131218	53919.5	62426.2	115632	73426	21020	54564.4	35744.9	74302.3	12432.9	87176.2	22445.6	378618	33820.5	185019
LIPID-P-1132	GL	TG	840.707	822.674	[M+NH4]+	C53H90O6	164286	843140	286834	33095.2	22301.9	270117	175659	401650	4880.16	15310.6	26714	67240.4	79762.1	54788	32237.3	100387	145970	139972	59856.3	34388.1	234938	146376	286393	56314.8	3427.6	287938	96590.8	265259	525586	608021	181403	596034	321628	110891	281444	222680	676225	191426	331611	351201	412774	292877	720034
LIPID-P-0963	GL	TG	790.695	772.658	[M+NH4]+	C49H88O6	329670	1.01703e+06	888308	13921.4	273664	18275.5	205966	607254	5946.73	3398.78	20379.4	31582.7	64465.7	69687.4	12032.5	62692.6	358449	158309	100802	1433.41	496424	299089	291301	64196.1	15106.7	703594	212492	1.48423e+06	1.5112e+06	1.10616e+06	475592	2.07159e+06	1.20901e+06	274801	920369	515360	1.28927e+06	410885	800060	451857	955676	764060	1.38361e+06
LIPID-P-2274	GL	TG	838.7	820.658	[M+NH4]+	C53H88O6	14344.5	145094	32712.1	13577.9	7689.63	74702.8	62574.8	43013.5	2249.49	19392.4	27508	87517.7	263479	108914	98579.1	255490	100373	28268.8	55113.3	19514.7	865875	719010	41747.3	70030.5	17054.7	238329	23406.7	113207	193155	174636	54796	570586	128477	12145.4	104984	104888	246712	74519.7	157010	131815	102069	127901	102619
LIPID-P-2275	GL	TG	788.68	770.642	[M+NH4]+	C49H86O6	321589	2.64732e+06	347254	2695.72	246464	317336	1.47985e+06	189222	1378.12	49286.2	160425	294574	5.50733e+06	1.45821e+06	1.17146e+06	1.34886e+06	1.80683e+06	186648	447350	3209.66	1.8726e+07	1.39703e+07	56770.5	179798	200567	3.94161e+06	203579	2.37489e+06	2.53159e+06	3.02626e+06	252732	1.23703e+07	2.31445e+06	172088	3.37621e+06	1.03619e+06	2.50261e+06	914467	2.08213e+06	1.25456e+06	974432	1.09547e+06	652386
LIPID-P-1032	GL	TG	816.708	798.674	[M+NH4]+	C51H90O6	412479	2.0611e+06	1.66898e+06	16574.8	509576	117022	574698	1.42474e+06	3942.26	16329.4	17778.7	62673.6	262188	119806	47345.3	124915	762099	346077	324916	8417.51	1.29395e+06	853056	592477	86103.6	18095.7	2.17497e+06	385015	1.73166e+06	2.52882e+06	3.04499e+06	922113	5.94858e+06	2.48305e+06	784019	2.21432e+06	927138	3.20264e+06	1.14049e+06	1.84482e+06	1.22158e+06	1.51218e+06	1.56498e+06	2.9759e+06
LIPID-P-2276	GL	TG	866.72	848.689	[M+NH4]+	C55H92O6	148902	657574	282651	119367	87441.3	510096	274931	307178	20963.6	139227	117594	755937	147885	128687	149336	500618	361337	223650	196043	149852	341686	388371	471169	226085	53398.3	614276	205407	373789	1.0051e+06	1.01033e+06	650690	1.1308e+06	432169	260343	365654	421149	1.4075e+06	377985	691066	805916	686430	646623	1.06924e+06
LIPID-P-1031	GL	TG	816.708	798.674	[M+NH4]+	C51H90O6	703548	4.28273e+06	2.18136e+06	13730.7	773555	27599.6	1.16722e+06	2.77954e+06	290.822	3386.03	29105	27431.9	426559	101162	70244.5	127133	1.66585e+06	535468	481418	1454.11	1.94013e+06	1.88228e+06	867524	77330.5	18516	4.65928e+06	478269	4.12781e+06	4.21433e+06	5.49996e+06	1.72371e+06	1.258e+07	6.31328e+06	1.07708e+06	4.55434e+06	1.98576e+06	8.29011e+06	2.27199e+06	4.02042e+06	2.1889e+06	2.74011e+06	3.07231e+06	4.20577e+06
LIPID-P-1082	GL	TG	814.69	796.658	[M+NH4]+	C51H88O6	114584	610969	681776	5920.29	249638	28026.4	263706	642478	360.717	3634.18	8161.51	23968.7	110593	44696.8	27630.1	70157.3	413004	111798	126807	2722.55	766714	631829	176861	20872.6	5459.56	940576	152615	1.03037e+06	1.22702e+06	1.4016e+06	419988	2.92504e+06	913609	196678	945556	403301	1.678e+06	615649	743710	464016	722240	552110	1.19634e+06
LIPID-P-0782	GL	TG	768.708	750.674	[M+NH4]+	C47H90O6	1.50441e+06	3.72566e+06	3.77513e+06	298332	1.45521e+06	209519	981240	4.91286e+06	111102	164103	133053	233183	349277	123905	244463	180864	1.02275e+06	770076	576282	208804	512575	431138	3.5473e+06	410684	156658	1.31643e+06	1.42733e+06	3.6415e+06	4.43844e+06	3.9961e+06	1.29919e+06	3.36388e+06	4.15715e+06	2.42836e+06	5.80473e+06	2.37002e+06	4.46385e+06	2.30042e+06	3.33401e+06	1.98153e+06	3.78964e+06	3.79543e+06	5.10953e+06
LIPID-P-2284	GL	TG	766.69	748.658	[M+NH4]+	C47H88O6	1.86725e+06	8.49898e+06	3.85352e+06	129073	1.48193e+06	472959	1.46486e+06	9.56882e+06	62624.9	110157	106939	258301	231151	76152.3	97904.8	73264.1	1.69385e+06	859206	840800	41613	376106	281196	2.39348e+06	177644	97223.2	2.73792e+06	1.55266e+06	6.73643e+06	6.56088e+06	1.08115e+07	2.78218e+06	8.56055e+06	6.76605e+06	1.60362e+06	7.71443e+06	4.13062e+06	8.95469e+06	5.67309e+06	5.94702e+06	3.97979e+06	4.00105e+06	6.55105e+06	4.02023e+06
LIPID-P-0884	GL	TG	764.673	746.642	[M+NH4]+	C47H86O6	202312	462557	231623	34867.5	76250.7	249322	288134	172026	41059.2	106272	86173.3	738186	451333	554574	139951	385192	254084	70034.9	78101.3	19351.5	1.70647e+06	794414	90189.9	157969	163684	437906	84735.4	742599	703012	375019	87594.4	1.06935e+06	487886	66740.9	527402	212523	307056	123068	404541	117570	237381	291221	171073
LIPID-P-0894	GL	TG	792.708	774.674	[M+NH4]+	C49H90O6	2.28375e+06	15094101	4.94722e+06	91365.8	1.36885e+06	2.07498e+06	5.38317e+06	2.25983e+06	14894.9	359368	882460	2.67022e+06	1.50761e+07	3.743e+06	6.0293e+06	2.95669e+06	5.51913e+06	1.33198e+06	2.45146e+06	43775	3.19848e+07	2.62862e+07	1.37925e+06	788323	1.0902e+06	1.15649e+07	1.4732e+06	1.15615e+07	1.3663e+07	9.23994e+06	2.99084e+06	3.58723e+07	1.19428e+07	1.50457e+06	1.13885e+07	5.33661e+06	1.55809e+07	4.31215e+06	9.52263e+06	4.42414e+06	4.95166e+06	7.2231e+06	5.26418e+06
LIPID-P-0832	GL	TG	780.703	762.674	[M+NH4]+	C48H90O6	65187.5	174710	90928.2	35137.9	120367	68157.7	52572.8	301697	47159.8	53745	44462.7	30545	55791.3	35134.7	33615.2	27535.3	89732.1	127752	79841.2	29339.5	32246.6	61279.8	51712.8	50279.6	49548.5	105786	164071	129261	110566	150696	191910	137441	134065	59680.8	95428.2	84066	163685	92766.3	54536.9	82569.1	393324	97370.5	133767
LIPID-P-0836	GL	TG	808.736	790.705	[M+NH4]+	C50H94O6	128320	357069	183040	58426.9	316371	87785	141301	464899	55138.9	44920.1	46885	82742.4	75544.8	82165.1	44415.3	60669	106952	211068	68252.3	41202.6	116928	89006.9	110334	64562.6	36000.2	144612	429259	199320	236652	226470	358346	350416	158499	87182.8	250873	131891	283769	168389	206655	119029	670150	145090	232286
LIPID-P-0898	GL	TG	806.722	788.689	[M+NH4]+	C50H92O6	47973.2	143220	52600	6433.24	154421	35815.8	47442	122889	7326.49	1092.32	15469.9	9198.5	32037.3	39587.4	12410.1	30182.5	57476.9	82626.4	12189.6	4711.97	74963.8	88629.4	28111.6	25561.6	13580.1	82092.4	232070	113464	111708	124203	143977	212800	118140	22326.4	94925.3	56011.8	164277	71780.7	115566	45463.8	436023	46381.2	92812.7
LIPID-P-0786	GL	TG	796.739	778.705	[M+NH4]+	C49H94O6	1.33985e+06	3.40184e+06	1.90804e+06	840887	2.21923e+06	873258	1.48443e+06	4.13931e+06	732074	789455	505477	946944	567071	438067	638654	447881	1.27314e+06	1.0811e+06	631537	1.53281e+06	614489	390112	1.55018e+06	780252	504881	904885	2.66717e+06	2.00435e+06	2.7945e+06	2.07635e+06	878875	1.09356e+06	2.07877e+06	1.02989e+06	1.75326e+06	1.48217e+06	1.62842e+06	1.27481e+06	1.02515e+06	1.17366e+06	2.92102e+06	1.75567e+06	1.94741e+06
LIPID-P-0834	GL	TG	794.724	776.689	[M+NH4]+	C49H92O6	1.37254e+06	3.26374e+06	1.85976e+06	463887	2.02963e+06	973228	1.28788e+06	3.69295e+06	260349	390860	355768	1.63741e+06	406289	522390	302395	748778	1.19817e+06	770247	644679	626677	727874	880456	1.23512e+06	520938	659917	1.30548e+06	1.87915e+06	3.00297e+06	3.41618e+06	2.24283e+06	2.16017e+06	2.84727e+06	1.97654e+06	949096	2.59826e+06	1.75648e+06	4.08424e+06	2.17358e+06	1.57267e+06	1.25058e+06	3.56477e+06	3.23782e+06	1.46741e+06
LIPID-P-0838	GL	TG	822.755	804.721	[M+NH4]+	C51H96O6	6.22948e+06	1.45421e+07	8.20312e+06	2.6385e+06	5.86846e+06	2.87694e+06	5.12146e+06	1.13621e+07	1.22264e+06	1.94506e+06	2.03641e+06	5.82707e+06	2.19978e+06	2.20102e+06	2.00934e+06	2.48059e+06	5.47567e+06	3.53985e+06	2.899e+06	2.53184e+06	4.19555e+06	3.41294e+06	6.94109e+06	2.97295e+06	2.50344e+06	5.68073e+06	6.06775e+06	1.02084e+07	1.21761e+07	7.88475e+06	5.81019e+06	8.98601e+06	1.00372e+07	4.75579e+06	8.88956e+06	5.26116e+06	9.13268e+06	5.87656e+06	7.39101e+06	7.17787e+06	1.31727e+07	8.79389e+06	1.42197e+07
LIPID-P-0902	GL	TG	820.739	802.705	[M+NH4]+	C51H94O6	3.80789e+06	8.60027e+06	3.99394e+06	644652	2.88939e+06	1.5434e+06	2.56928e+06	6.40604e+06	303739	378453	1.20575e+06	1.25874e+06	1.08093e+06	1.85169e+06	592237	2.13971e+06	3.0712e+06	1.96773e+06	1.1942e+06	683316	3.70419e+06	3.26053e+06	3.03151e+06	1.62715e+06	1.00383e+06	4.71199e+06	2.85979e+06	7.23958e+06	6.05882e+06	6.13731e+06	3.59561e+06	7.1127e+06	5.64626e+06	2.83051e+06	8.18459e+06	2.99283e+06	7.39742e+06	2.95854e+06	4.50591e+06	2.70533e+06	9.43342e+06	5.55152e+06	8.2364e+06
LIPID-P-1040	GL	TG	844.74	826.705	[M+NH4]+	C53H94O6	318768	1.00138e+06	430293	119924	288133	385654	242071	525949	104946	102787	132398	247134	116721	178831	50235.9	338701	379842	186735	145588	104932	497219	433412	365113	272082	201294	495594	249599	757990	748655	672780	366997	855350	565544	155469	634385	298328	676285	195392	741285	267010	938245	287936	1.04591e+06
LIPID-P-0799	GL	TG	880.833	862.799	[M+NH4]+	C55H106O6	27370.5	99699.4	113612	9213.04	69813.4	11183.9	41525.2	169554	16552.7	12537.4	1933.98	12674.6	15177.8	6002.07	8870.68	6766.36	30926.5	44782.1	13063.2	5859.82	12067.4	15044.8	33655.8	13864.3	9156.42	46037.1	32954	24158.7	91973.3	25131.4	19228.8	58185.4	82486	19931.7	62093.5	48926.6	122360	25472.7	50300.1	28971.1	52784.2	27665.4	66570.5
LIPID-P-0900	GL	TG	806.722	788.689	[M+NH4]+	C50H92O6	36881.7	105271	30939.2	19825.8	83384.9	59739.6	41047.4	82301.9	14106.8	10543.1	26130.9	48948.9	36235.9	36761.9	19205.2	27864.5	60391	34119.8	23111	10264.9	34878	39991.6	22170.1	14609.3	18882.4	35100.7	143377	54968.8	59875.9	58487.6	68062.6	112799	42680	30139.7	43174.2	31398.5	47953.3	34033.4	39837.4	31320.8	219896	41584.7	44640.2
LIPID-P-0904	GL	TG	820.739	802.705	[M+NH4]+	C51H94O6	3.16829e+06	7.72782e+06	3.3687e+06	1.20856e+06	2.05213e+06	2.17434e+06	2.98977e+06	5.47173e+06	409631	1.05034e+06	1.26601e+06	5.45535e+06	1.31032e+06	2.27955e+06	1.01333e+06	3.10381e+06	3.49403e+06	1.93339e+06	1.47521e+06	983744	3.17754e+06	3.06687e+06	2.96564e+06	2.25368e+06	2.00756e+06	3.89572e+06	2.34902e+06	6.17853e+06	5.23826e+06	4.23339e+06	3.33521e+06	5.76833e+06	4.27783e+06	2.19419e+06	6.4778e+06	2.69401e+06	5.27336e+06	1.81891e+06	4.07857e+06	2.23067e+06	7.9868e+06	4.41451e+06	6.76714e+06
LIPID-P-0967	GL	TG	818.724	800.689	[M+NH4]+	C51H92O6	534656	2.04374e+06	970028	110442	362676	548328	387104	609700	52439.4	141557	337947	1.0187e+06	189355	861194	136247	927635	665607	329384	202943	74477.8	1.26424e+06	880231	317323	471146	440100	1.00986e+06	554376	1.39453e+06	1.94942e+06	894092	655009	1.7013e+06	1.04301e+06	347905	1.02446e+06	756536	977488	321963	1.05762e+06	488675	1.84694e+06	530912	1.33e+06
LIPID-P-1033	GL	TG	816.708	798.674	[M+NH4]+	C51H90O6	40774.3	216336	111250	33819	43749.1	196146	68326	38558.6	15935.1	37300	41560.1	315903	28600.5	151260	22130.5	193867	64945.3	32147.4	32211.7	17435.3	217277	158767	34580.5	57198.1	50835.5	149529	84088.2	219971	207331	107586	76683.9	257264	156055	32277.4	99124.2	77329.1	99998.8	38498.5	112027	39495.4	252960	54367.4	111772
LIPID-P-1090	GL	TG	842.724	824.689	[M+NH4]+	C53H92O6	274201	1.17167e+06	401687	50246.9	186256	191960	448075	666853	16614.7	44786.8	44922.6	280223	143303	124548	44289.9	154964	383848	242382	208949	32938.6	451612	577635	469347	88936.3	91867.5	1.68691e+06	217644	1.07241e+06	1.7902e+06	1.17824e+06	723733	3.55963e+06	1.30154e+06	341394	971668	580036	1.69757e+06	605542	1.08167e+06	641722	841597	577711	2.07866e+06
LIPID-P-1131	GL	TG	840.707	822.674	[M+NH4]+	C53H90O6	11409.1	98477.5	77048.3	1960.58	16591.8	242393	5903.21	16335.8	272.143	1488.8	6765.41	9556.18	6052.59	13646.2	1398.68	7274.86	26542.2	8836.52	1960.58	1360.72	39724.5	72633.3	17535.2	1792.24	2530.05	21431.3	22736.5	52881	27665.1	27836	32418.1	91412.3	29992.8	10587.8	15962.8	12772.4	49569.5	2246.15	42766.5	22319.8	151792	22514.4	44214.2
LIPID-P-0911	GL	TG	848.771	830.736	[M+NH4]+	C53H98O6	5.75417e+06	1.02855e+07	9.03263e+06	1.34173e+06	4.11455e+06	2.93647e+06	5.67841e+06	9.21929e+06	525748	1.45785e+06	1.88783e+06	5.97923e+06	2.46155e+06	2.8891e+06	2.27535e+06	3.19511e+06	5.14491e+06	4.03111e+06	2.68271e+06	1.27725e+06	5.83541e+06	4.48325e+06	6.4865e+06	2.35836e+06	2.2823e+06	6.44991e+06	4.9828e+06	9.82168e+06	8.24961e+06	7.4299e+06	7.23452e+06	1.60255e+07	9.62724e+06	6.19205e+06	9.30156e+06	6.27384e+06	1.32362e+07	7.85857e+06	7.82085e+06	6.62393e+06	6.89157e+06	8.86764e+06	1.40823e+07
LIPID-P-0798	GL	TG	880.833	862.799	[M+NH4]+	C55H106O6	133479	522724	959333	131492	291600	251617	227131	408849	76538.5	91114.9	54568.6	160687	64497.6	101583	119431	93235.1	108760	128568	116021	200081	70069.6	139633	114514	105370	47229.3	171757	96780.6	83123.8	307736	118174	25616.6	70187.5	264493	134033	142969	142033	182340	65769.1	127023	51714.6	391133	59983.3	572793
LIPID-P-0918	GL	TG	876.802	858.768	[M+NH4]+	C55H102O6	46564.7	148792	82012.1	21287.5	49500.3	41877	60443.3	91779.1	10084.2	23242.6	26312.2	52070.8	28034.2	38666.7	36405.4	58666.4	87740.9	62485.6	35480.1	16952.4	91876	77686.8	68399.2	35395.4	32602.7	87054.5	81917.6	147095	143313	76343.2	58941.3	164070	44642	54652.4	138124	86270.2	184352	70157.2	102477	53433.5	82746.4	99821.6	147328
LIPID-P-1036	GL	TG	844.74	826.705	[M+NH4]+	C53H94O6	1.03092e+06	5.02926e+06	2.14182e+06	82867.4	1.07942e+06	788493	1.05432e+06	2.88133e+06	29588	128269	803148	600242	713356	1.24404e+06	284275	1.55891e+06	1.684e+06	858142	442146	41474.1	4.60292e+06	5.33458e+06	784085	633382	504301	3.37543e+06	1.43531e+06	3.34902e+06	5.01175e+06	3.73976e+06	2.02172e+06	9.25342e+06	3.57916e+06	1.02849e+06	4.4356e+06	1.93314e+06	4.97813e+06	1.43852e+06	4.01937e+06	1.82347e+06	5.29676e+06	1.83538e+06	5.49229e+06
LIPID-P-1087	GL	TG	842.724	824.689	[M+NH4]+	C53H92O6	165006	745178	506721	17290.1	304365	188125	196248	432490	995.988	31387.8	198364	214068	165105	343674	48599.1	462647	324231	159223	62508.3	21327.9	1.17249e+06	1.84088e+06	79849	139477	136576	1.00361e+06	331471	851310	868865	579443	415368	2.24561e+06	795019	219467	747307	358686	945825	287796	734709	260706	1.48309e+06	282765	1.1735e+06
LIPID-P-2289	GL	TG	920.76	902.736	[M+NH4]+	C59H98O6	1.10091e+06	7.41724e+06	1.97842e+06	3.0747e+06	1.54994e+06	6.99731e+06	3.12825e+06	1.99463e+06	414281	3.41172e+06	6.5794e+06	1.40384e+07	4.46267e+06	5.93241e+06	4.48953e+06	2.14121e+07	6.13112e+06	7.36148e+06	3.28323e+06	5.10329e+06	1.24896e+07	7.87868e+06	4.85574e+06	9.56979e+06	2.23537e+06	6.06916e+06	5.25247e+06	2.45728e+06	6.27938e+06	7.3045e+06	4.65944e+06	6.62671e+06	4.2211e+06	1.5323e+06	2.69545e+06	2.82863e+06	6.33588e+06	1.80465e+06	6.50858e+06	4.94629e+06	8.77622e+06	3.05311e+06	9.7031e+06
LIPID-P-2290	GL	TG	916.73	898.705	[M+NH4]+	C59H94O6	13060.3	124119	18594.7	26038.2	13963.7	270781	9688.7	17646.8	5203.03	31865.6	62291.5	158318	21164.5	100847	45861.3	385611	60837	50415.7	15994.8	28103.9	151528	176383	26797.3	89076.3	18946.4	59118.6	46926.7	27171.2	64401.2	82692.2	38832.7	93655.9	64107.3	18274.7	25572.4	36843.7	74646.2	13755.2	64653.2	33923.7	192928	38121	95241.7
LIPID-P-1239	GL	TG	940.739	922.705	[M+NH4]+	C61H94O6	5822.42	68455.8	22284.8	9931.79	6340.07	223060	5881.49	11409.8	1792.91	10001.8	4679.09	22919	9981.04	16710.2	11280.6	91691.2	24860.8	31058.4	3200.32	32173.1	57843.4	50517.8	19870.4	38322.4	8127.11	28926.5	17642.6	5422.12	12509.6	46862.7	22078.9	13995.2	13855.6	2696.05	4061.41	7774.19	40986.7	3591.15	23850.2	31129	165920	5384.03	29760.2
LIPID-P-0955	GL	TG	762.656	744.627	[M+NH4]+	C47H84O6	46275.2	195839	28265	1806.94	30514.6	64237.2	76370.9	18872.8	5394.97	10786.1	36316.3	184458	163538	190559	52115.8	161879	70934.3	24177.1	13463.1	10826.2	1.2828e+06	694726	5833.27	47627.6	74319.4	268209	17969.8	262203	280014	155812	31813.1	517662	197751	11656.5	170841	71861.6	123215	51013.4	135282	52113	126345	75662	43579.3
LIPID-P-0892	GL	TG	792.708	774.674	[M+NH4]+	C49H90O6	2.05581e+06	7.74355e+06	6.00294e+06	109936	1.51006e+06	221469	1.96909e+06	6.29942e+06	36220.4	129719	112863	414356	548622	294853	165665	207666	1.88437e+06	1.19308e+06	893897	89017.7	1.52366e+06	1.10476e+06	2.2957e+06	338736	108227	4.44324e+06	1.37339e+06	9.15451e+06	7.46827e+06	9.04758e+06	2.53863e+06	1.03938e+07	7.94377e+06	2.04859e+06	1.04192e+07	3.41544e+06	9.70803e+06	3.77211e+06	5.80898e+06	3.5032e+06	5.02608e+06	5.06196e+06	1.09809e+07
LIPID-P-0960	GL	TG	790.688	772.658	[M+NH4]+	C49H88O6	23883.5	47604.7	115960	27845.4	39044.4	29331.7	31746.2	46660	15057.3	23575.9	21655.8	123612	27143.6	37907.5	24056.3	30658.1	33677.3	42323.9	7378.9	9135.93	58972.6	75261.5	11703.3	17678.3	23308.4	61082.5	82784.8	63976.1	57609.8	61853.7	111206	280238	58662	51855.5	51952.8	40413.3	60882.9	45211.5	29275.6	32419.7	189509	42977.2	305850
LIPID-P-0964	GL	TG	818.724	800.689	[M+NH4]+	C51H92O6	626998	2.09633e+06	818895	672210	541320	1.38733e+06	929782	955120	233490	1.18778e+06	681699	1.26152e+07	461169	1.89708e+06	627546	2.23808e+06	1.16688e+06	471114	639636	444934	1.41433e+06	1.09156e+06	467744	632811	2.00764e+06	1.02563e+06	457303	1.80873e+06	2.58337e+06	653179	994626	1.7956e+06	1.22764e+06	409138	795501	727339	707823	281694	1.38417e+06	334837	1.5774e+06	578704	1.3052e+06
LIPID-P-2292	GL	TG	838.69	820.658	[M+NH4]+	C53H88O6	26023.6	114008	52380.1	182.706	6733.53	196542	11260.5	8978.52	182.706	1481.76	182.706	6276.95	1480.51	16301.5	1354.05	4938.15	10303.5	15239.1	2715.07	2708.07	36706.1	25932	17485.2	2245.91	3134.91	11655	9491.7	35396.4	31855.8	34061	47428.4	70087.2	15697.5	4016.18	21916	13904.1	40334.8	6281.5	18770.7	10710.7	126647	10780.9	24263.3
LIPID-P-1193	GL	TG	864.705	846.674	[M+NH4]+	C55H90O6	43613.1	258129	67811.7	7701.79	17215.8	104422	35891.1	113232	646.882	8090.24	9351.68	97324.9	41340.7	35261.1	5880.96	100362	177569	79655.4	56707	22206.5	204105	211905	101261	33452.8	3234.41	286029	38104.3	152131	378951	372243	177934	684443	234146	55376.3	152289	153142	569098	124941	321936	252708	192625	180523	346241
LIPID-P-1088	GL	TG	842.726	824.689	[M+NH4]+	C53H92O6	17809.3	50757	76913.2	8775.85	46005.5	36045	29189.3	27707.2	1464.92	291.181	21733.3	66855.9	40771.4	66559.4	25818.7	94446.3	31649	18793.7	6827.83	1455.91	219675	327923	11851.8	15298.4	25670.1	102348	49274.4	97011.5	126953	57351.4	88616.6	401987	108425	40076.5	80576.3	45352.3	85786.7	48953.6	82094.9	41569.8	279614	22256.2	424899
LIPID-P-1129	GL	TG	840.704	822.674	[M+NH4]+	C53H90O6	21374	79722.7	50469.9	1481.59	36548.9	42454.1	10015.5	41726.9	277.33	9137.3	17744.1	50344.4	11371	38827.2	9922.07	73310.5	25935.1	10499.3	1481.62	1481.62	166626	192356	12269	17282.8	16913.7	109001	61206.6	126440	90008.2	76813.2	58200	265631	76804.9	26737	71926.9	35469.2	77222.5	28870.7	90687.3	23805.6	266980	48574.1	172674
LIPID-P-2293	GL	TG	866.71	848.689	[M+NH4]+	C55H92O6	15929	58004	53412.8	3918.22	15597.8	14175.8	24774.3	26665.2	4114.11	14614.6	18770.1	36464.4	29505.6	26930.3	2688.03	28300.6	16226.1	10451.1	11433.1	2874.31	106192	236311	15202.3	13240.9	13476.5	105585	31379.1	98055	90555.5	60930.7	110522	424825	63194.3	37952.8	68017.8	57191.9	84783.9	58474.6	81810.3	66145.2	196931	35195	271444
LIPID-P-0787	GL	TG	810.752	792.721	[M+NH4]+	C50H96O6	327549	377408	393280	302745	499330	352137	368540	709187	366159	339575	302258	292460	333062	290636	404294	431793	541336	439883	387972	527812	377678	289261	296947	287817	368269	386194	647517	355010	374911	334165	383292	377736	365822	323145	302344	371650	356887	341167	306506	327098	981218	343504	492232
[truncated: 228 more rows]
[truncated: 58 more columns]
